# Supplementary material for: Highly diastereoselective annulation of 2-substituted 3-nitro-2H-chromenes with hemicurcuminoids and curcuminoids via a double and triple Michael reaction cascade
Source: Royal Society of Chemistry journal article supplement (doi:10.1039/d2nj02019j), 2022-01-01

# Supporting Information

## for

### **Highly diastereoselective annulation of 2-substituted 3-nitro-2*H*-chromenes with hemicurcuminoids and curcuminoids *via* a double and triple Michael reaction cascade**

Nikolay S. Zimnitskiy, Alexey Yu. Barkov, Ivan A. Kochnev, Igor B. Kutyashev, Vladislav Yu. Korotaev\*, Vyacheslav Ya. Sosnovskikh

## Table of Contents

|                                                                                      |           |
|--------------------------------------------------------------------------------------|-----------|
| General procedures and compound characterization                                     | S2–S48    |
| X-ray crystallography data                                                           | S49–S52   |
| References                                                                           | S53       |
| <sup>1</sup> H and <sup>13</sup> C NMR spectra of synthesized compounds              | S54–S127  |
| 2D <sup>1</sup> H– <sup>1</sup> H NOESY spectra of compounds <b>8f</b> and <b>10</b> | S139–S140 |

## General procedures

IR spectra were recorded on a Shimadzu IRSpirit-T spectrometer equipped with an ATR accessory. NMR spectra were recorded on Bruker Avance III-500 ( $^1\text{H}$ , 500 MHz;  $^{19}\text{F}$ , 376 MHz;  $^{13}\text{C}$ , 126 MHz) and Bruker Avance NEO ( $^1\text{H}$ , 600 MHz;  $^{13}\text{C}$ , 151 MHz) spectrometers in  $\text{CDCl}_3$ . The chemical shifts ( $\delta$ ) are reported in ppm relative to the internal standard TMS ( $^1\text{H}$ ,  $^{19}\text{F}$  NMR) or residual signal of the solvent ( $^{13}\text{C}$  NMR, 77.16 ppm). 2D  $^1\text{H}$ - $^1\text{H}$  NOESY spectra were acquired on a Bruker AVANCE NEO (600 MHz) spectrometer with 0.3 s mixing time. The HRMS spectra were obtained using the UHR-QqTOF maXis Impact HD (Bruker Daltonics) mass spectrometer. Elemental analysis was performed on a PerkinElmer PE 2400 automatic analyser. Melting points were determined on an SMP40 apparatus. All solvents used were dried and distilled by standard procedures. The starting chromenes **1a-g**,<sup>1a</sup> **1k-m**,<sup>1b</sup> **2a-c**,<sup>1c</sup> enediones **3a-p**<sup>2a</sup>, **3q**<sup>2b</sup> and curcuminoids **4a,b**<sup>2c</sup> were prepared according to described procedures. Curcumin **4c** was purchased from Sigma-Aldrich and used as is.

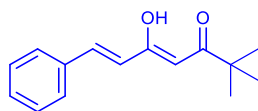

(*4Z,6E*)-5-Hydroxy-2,2-dimethyl-7-phenylhepta-4,6-dien-3-one (**3r**). 5,5-Dimethylhexane-2,4-dione (1 g, 7 mmol) has been added to a mixture of  $\text{B}_2\text{O}_3$  (0.34 g, 4.9 mmol) in EtOAc (5 mL) and  $\text{B}(\text{OMe})_3$  (5 mL) and stirred at 60 °C for 30 min. After that the reaction was cooled down and a benzaldehyde (0.75 g, 7 mmol) was added to it, followed by dropwise addition of a 20% solution of  $\text{BnNH}_2$  (0.5 mL) in EtOAc within 1 h. The reaction was stirred overnight, then acidified with 1M HCl (4 ml) and stirred at 50 °C for 1 h. The resulting mixture was diluted with  $\text{H}_2\text{O}$  (20 mL) and the precipitate was collected by filtration. Yellowish precipitate was washed with water (100 mL), dried under reduced pressure and recrystallized from MeOH (7 mL) to give the target enedione. Yield 903 mg (56%), light yellow powder, mp 102–103 °C (lit.<sup>3</sup> 101 °C). IR (ATR): 2977, 1639, 1585, 1564, 1471, 1423  $\text{cm}^{-1}$ ;  $^1\text{H}$  NMR (500 MHz,  $\text{CDCl}_3$ )  $\delta$  1.21 (s, 9H), 5.80 (s, 1H), 6.53 (d,  $J = 15.9$  Hz, 1H), 7.32–7.41 (m, 3H), 7.53 (dd,  $J = 7.7, 1.6$  Hz, 2H), 7.59 (d,  $J = 15.9$  Hz, 1H), 15.67 (s, 1H);  $^{13}\text{C}\{^1\text{H}\}$  NMR (126 MHz,  $\text{CDCl}_3$ )  $\delta$  27.3 (3C), 40.9, 97.0, 123.5, 128.1 (2C), 129.0 (2C), 129.9, 135.3, 139.4, 178.1, 207.0. Anal. Calcd for  $\text{C}_{15}\text{H}_{18}\text{O}_2$ : C, 78.23; H, 7.88. Found: C, 78.22; H, 7.88.

**General procedure for the synthesis of 10-arylhexahydro-9H-benzo[*c*]chromen-9-ones 5.** A mixture of the appropriate 2*H*-nitrochromene **1** (0.25 mmol), enedione **3** (0.25 mmol) and  $\text{K}_2\text{CO}_3$  (9 mg, 0.06 mmol) was dissolved in dichloromethane (2 mL) and stirred for 48 h at room temperature (TLC control,  $\text{CH}_2\text{Cl}_2$ -hexane (1:1)). Upon completion of the reaction, formed orange solution was quenched with hexane (5 ml), precipitate was filtered off and the residue was evaporated under reduced pressure

to complete dryness. Residue was washed with cold methanol to give target products **5**.

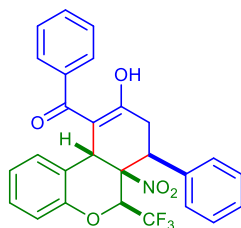

((6*S*\*,6*aR*\*,7*S*\*,10*aR*\*)-9-Hydroxy-6*a*-nitro-7-phenyl-6-(trifluoromethyl)-6*a*,7,8,10*a*-tetrahydro-6*H*-benzo[*c*]chromen-10-yl)(phenyl)methanone (**5aa**). Obtained from **1a** (61 mg) and **3a** (63 mg) according to the general procedure. Yield 122 mg (98%), white powder, mp 210–211 °C. IR (ATR): 1600, 1583, 1553, 1486, 1454, 1374, 1270 cm<sup>-1</sup>; <sup>1</sup>H NMR (500 MHz, CDCl<sub>3</sub>) δ 2.72 (dd, *J* = 19.1, 5.4 Hz, 1H), 3.05 (dd, *J* = 19.1, 13.4 Hz, 1H), 3.74 (dd, *J* = 13.4, 5.4 Hz, 1H), 4.93 (q, <sup>3</sup>*J*<sub>H,F</sub> = 7.0 Hz, 1H), 5.20 (s, 1H), 7.01 (t, *J* = 7.5 Hz, 1H), 7.04–7.11 (m, 2H), 7.22–7.33 (m, 3H), 7.39–7.52 (m, 6H), 7.79–7.87 (m, 2H), 16.32 (s, 1H); <sup>19</sup>F NMR (376 MHz, CDCl<sub>3</sub>) δ 91.19 (d, *J* = 7.0 Hz, CF<sub>3</sub>); <sup>13</sup>C{<sup>1</sup>H} NMR (126 MHz, CDCl<sub>3</sub>) δ 35.3 (q, <sup>3</sup>*J*<sub>C,F</sub> = 1.6 Hz, C-6*a*), 36.7, 41.5, 74.0 (q, <sup>2</sup>*J*<sub>C,F</sub> = 31.1 Hz, C-6), 85.5, 106.8, 116.9, 122.9, 123.1, 123.3 (q, <sup>1</sup>*J*<sub>C,F</sub> = 287.6 Hz, CF<sub>3</sub>), 127.8 (2C), 128.8 (2C), 128.9 (2C), 129.2, 129.3, 129.6, 129.7 (2C), 131.4, 134.1, 136.1, 149.0, 187.1, 190.3. HRMS (ESI) *m/z*: [M + H]<sup>+</sup> calcd for C<sub>27</sub>H<sub>21</sub>F<sub>3</sub>NO<sub>5</sub> 496.1366, found 496.1359.

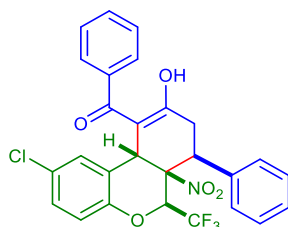

((6*S*\*,6*aR*\*,7*S*\*,10*aR*\*)-2-Chloro-9-hydroxy-6*a*-nitro-7-phenyl-6-(trifluoromethyl)-6*a*,7,8,10*a*-tetrahydro-6*H*-benzo[*c*]chromen-10-yl)(phenyl)methanone (**5ba**). Obtained from **1b** (70 mg) and **3a** (63 mg) according to the general procedure. Yield 122 mg (92%), white powder, mp 180–181 °C. IR (ATR): 1600, 1557, 1481, 1454, 1379, 1274 cm<sup>-1</sup>; <sup>1</sup>H NMR (500 MHz, CDCl<sub>3</sub>) δ 2.75 (dd, *J* = 19.1, 5.5 Hz, 1H), 3.06 (dd, *J* = 19.1, 13.4 Hz, 1H), 3.68 (dd, *J* = 13.4, 5.5 Hz, 1H), 4.92 (q, <sup>3</sup>*J*<sub>H,F</sub> = 7.0 Hz, 1H), 5.18 (s, 1H), 7.00 (d, *J* = 8.7 Hz, 1H), 7.05 (s, 1H), 7.20 (d, *J* = 8.7 Hz, 1H), 7.23–7.26 (m, 2H), 7.39–7.46 (m, 3H), 7.46–7.53 (m, 3H), 7.78–7.84 (m, 2H), 16.37 (s, 1H); <sup>19</sup>F NMR (376 MHz, CDCl<sub>3</sub>) δ 91.20 (d, *J* = 7.0 Hz, CF<sub>3</sub>); <sup>13</sup>C{<sup>1</sup>H} NMR (126 MHz, CDCl<sub>3</sub>) δ 35.2, 36.6 (q, <sup>3</sup>*J*<sub>C,F</sub> = 1.5 Hz, C-6*a*), 41.6, 74.0 (q, <sup>2</sup>*J*<sub>C,F</sub> 31.0 Hz, C-6), 85.2, 106.3, 118.3, 123.2 (q, <sup>1</sup>*J*<sub>C,F</sub> 287.6 Hz, CF<sub>3</sub>), 124.6, 127.7 (2C), 128.4, 128.9 (2C), 129.1 (3C), 129.4, 129.6, 129.7 (2C), 131.5, 133.8, 135.9, 147.6, 187.2, 190.6. HRMS (ESI) *m/z*: [M + H]<sup>+</sup> calcd for C<sub>27</sub>H<sub>20</sub>ClF<sub>3</sub>NO<sub>5</sub> 530.0977, found 530.0994.

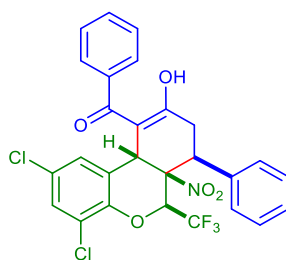

((6*S*\*,6*aR*\*,7*S*\*,10*aR*\*)-2,4-Dichloro-9-hydroxy-6*a*-nitro-7-phenyl-6-(trifluoromethyl)-6*a*,7,8,10*a*-tetrahydro-6*H*-benzo[*c*]chromen-10-yl)(phenyl)methanone (**5ca**). Obtained from **1c** (79 mg) and **3a** (63 mg) according to the general procedure. Yield 136 mg (96%), white powder, mp 178–179 °C. IR (ATR): 1603, 1554, 1491, 1449, 1378, 1276 cm<sup>-1</sup>; <sup>1</sup>H NMR (500 MHz, CDCl<sub>3</sub>) δ 2.77 (dd, *J* = 19.1, 5.5 Hz, 1H), 3.07 (dd, *J* = 19.1, 13.4 Hz, 1H), 3.62 (dd, *J* = 13.4, 5.5 Hz, 1H), 5.04 (q, <sup>3</sup>*J*<sub>H,F</sub> = 6.9 Hz, 1H), 5.20 (s, 1H), 6.96 (d, *J* = 1.4 Hz, 1H), 7.21–7.26 (m, 2H), 7.33 (d, *J* = 1.4 Hz, 1H), 7.41–7.47 (m, 3H), 7.47–7.54 (m, 3H), 7.76–7.82 (m, 2H), 16.36 (s, 1H); <sup>19</sup>F NMR (376 MHz, CDCl<sub>3</sub>) δ 91.17 (d, *J* = 6.9 Hz, CF<sub>3</sub>); <sup>13</sup>C{<sup>1</sup>H} NMR (126 MHz, CDCl<sub>3</sub>) δ 35.2, 36.9 (q, <sup>3</sup>*J*<sub>C,F</sub> = 1.6 Hz, C-6*a*), 41.8, 74.3 (q, <sup>2</sup>*J*<sub>C,F</sub> = 31.4 Hz, C-6), 85.0, 106.0, 123.0 (q, <sup>1</sup>*J*<sub>C,F</sub> = 287.6 Hz, CF<sub>3</sub>), 123.3, 125.9, 127.6 (3C), 128.2, 129.1 (2C), 129.2 (2C), 129.6, 129.7 (2C), 129.9, 131.6, 133.5, 135.8, 143.8, 187.2, 190.7. Anal. Calcd for C<sub>27</sub>H<sub>18</sub>Cl<sub>2</sub>F<sub>3</sub>NO<sub>5</sub>·H<sub>2</sub>O: C, 55.69; H, 3.46; N, 2.41. Found: C, 55.41; H, 3.14; N, 2.40.

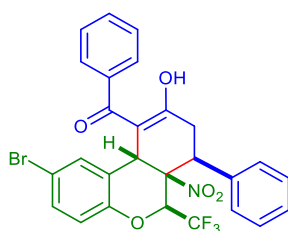

((6*S*\*,6*aR*\*,7*S*\*,10*aR*\*)-2-Bromo-9-hydroxy-6*a*-nitro-7-phenyl-6-(trifluoromethyl)-6*a*,7,8,10*a*-tetrahydro-6*H*-benzo[*c*]chromen-10-yl)(phenyl)methanone (**5da**). Obtained from **1d** (81 mg) and **3a** (63 mg) according to the general procedure. Yield 131 mg (91%), white powder, mp 173–174 °C. IR (ATR): 1600, 1577, 1556, 1478, 1421, 1378, 1274 cm<sup>-1</sup>; <sup>1</sup>H NMR (500 MHz, CDCl<sub>3</sub>) δ 2.76 (dd, *J* = 19.1, 5.5 Hz, 1H), 3.06 (dd, *J* = 19.1, 13.4 Hz, 1H), 3.67 (dd, *J* = 13.4, 5.5 Hz, 1H), 4.91 (q, <sup>3</sup>*J*<sub>H,F</sub> = 6.9 Hz, 1H), 5.18 (s, 1H), 6.95 (d, *J* = 8.7 Hz, 1H), 7.19 (d, *J* = 1.8 Hz, 1H), 7.23–7.27 (m, 2H), 7.34 (dd, *J* = 8.6, 1.8 Hz, 1H), 7.41–7.45 (m, 3H), 7.48–7.52 (m, 3H), 7.78–7.83 (m, 2H), 16.38 (s, 1H); <sup>19</sup>F NMR (376 MHz, CDCl<sub>3</sub>) δ 91.18 (d, *J* = 6.9 Hz, CF<sub>3</sub>); <sup>13</sup>C{<sup>1</sup>H} NMR (126 MHz, CDCl<sub>3</sub>) δ 35.2, 36.7 (q, <sup>3</sup>*J*<sub>C,F</sub> = 2.3 Hz, C-6*a*), 41.6, 74.0 (q, <sup>2</sup>*J*<sub>C,F</sub> = 31.0 Hz, C-6), 85.1, 106.2, 115.6, 118.7, 123.1 (q, <sup>1</sup>*J*<sub>C,F</sub> = 287.6 Hz, CF<sub>3</sub>), 125.0, 127.6 (2C), 128.9 (2C), 129.1 (2C), 129.4, 129.7 (2C), 131.5, 132.0, 132.5, 133.8, 135.9, 148.2, 187.1, 190.8. HRMS (ESI) *m/z*: [M + H]<sup>+</sup> calcd for C<sub>27</sub>H<sub>20</sub>BrF<sub>3</sub>NO<sub>5</sub> 574.0471, found 574.0464.

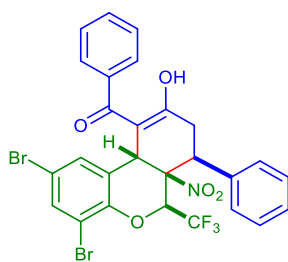

((6*S*\*,6*aR*\*,7*S*\*,10*aR*\*)-2,4-Dibromo-9-hydroxy-6*a*-nitro-7-phenyl-6-(trifluoromethyl)-6*a*,7,8,10*a*-tetrahydro-6*H*-benzo[*c*]chromen-10-yl)(phenyl)methanone (**5ea**). Obtained from **1e** (101 mg) and **3a** (63 mg) according to the general procedure. Yield 131 mg (80%), white powder, mp 219–220 °C. IR (ATR): 1604, 1553, 1492, 1442, 1376, 1273 cm<sup>-1</sup>; <sup>1</sup>H NMR (500 MHz, CDCl<sub>3</sub>) δ 2.77 (dd, *J* = 19.1, 5.5 Hz, 1H), 3.07 (dd, *J* = 19.1, 13.4 Hz, 1H), 3.61 (dd, *J* = 13.4, 5.5 Hz, 1H), 5.03 (q, <sup>3</sup>*J*<sub>H,F</sub> = 6.9 Hz, 1H), 5.22 (s, 1H), 7.14 (d, *J* = 1.5 Hz, 1H), 7.22–7.27 (m, 2H), 7.42–7.47 (m, 3H), 7.47–7.53 (m, 3H), 7.62 (d, *J* = 1.5 Hz, 1H), 7.74–7.83 (m, 2H), 16.37 (s, 1H); <sup>19</sup>F NMR (376 MHz, CDCl<sub>3</sub>) δ 91.13 (d, *J* = 6.9 Hz, CF<sub>3</sub>); <sup>13</sup>C{<sup>1</sup>H} NMR (126 MHz, CDCl<sub>3</sub>) δ 35.2, 36.8 (q, <sup>3</sup>*J*<sub>C,F</sub> = 1.3 Hz, C-6*a*), 41.7, 74.4 (q, <sup>2</sup>*J*<sub>C,F</sub> = 31.5 Hz, C-6), 84.9, 106.0, 112.0, 115.5, 122.9 (q, <sup>1</sup>*J*<sub>C,F</sub> = 287.5 Hz, CF<sub>3</sub>), 126.1, 127.6 (2C), 129.1 (2C), 129.2 (2C), 129.6, 129.7 (2C), 131.3, 131.6, 133.4, 135.5, 135.8, 145.2, 187.1, 190.9. HRMS (ESI) *m/z*: [M + H]<sup>+</sup> calcd for C<sub>27</sub>H<sub>19</sub>Br<sub>2</sub>F<sub>3</sub>NO<sub>5</sub> 651.9577, found 651.9568.

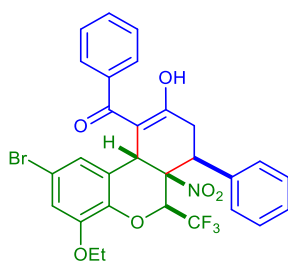

((6*S*\*,6*aR*\*,7*S*\*,10*aR*\*)-2-Bromo-4-ethoxy-9-hydroxy-6*a*-nitro-7-phenyl-6-(trifluoromethyl)-6*a*,7,8,10*a*-tetrahydro-6*H*-benzo[*c*]chromen-10-yl)(phenyl)methanone (**5fa**). Obtained from **1f** (92 mg) and **3a** (63 mg) according to the general procedure. Yield 138 mg (89%), white powder, mp 226–227 °C. IR (ATR): 1603, 1573, 1549, 1468, 1454, 1374, 1264 cm<sup>-1</sup>; <sup>1</sup>H NMR (500 MHz, CDCl<sub>3</sub>) δ 1.45 (t, *J* = 7.0 Hz, 3H), 2.75 (dd, *J* = 19.1, 5.6 Hz, 1H), 3.05 (dd, *J* = 19.1, 13.2 Hz, 1H), 3.71 (dd, *J* = 13.2, 5.6 Hz, 1H), 4.10 (dq, *J* = 9.7, 7.0 Hz, 1H), 4.11 (dq, *J* = 9.7, 7.0 Hz, 1H), 5.01 (q, <sup>3</sup>*J*<sub>H,F</sub> = 7.0 Hz, 1H), 5.16 (s, 1H), 6.78 (s, 1H), 6.94 (s, 1H), 7.23–7.29 (m, 2H), 7.40–7.45 (m, 3H), 7.46–7.52 (m, 3H), 7.77–7.82 (m, 2H), 16.34 (s, 1H); <sup>19</sup>F NMR (376 MHz, CDCl<sub>3</sub>) δ 91.36 (d, *J* = 7.0 Hz, CF<sub>3</sub>); <sup>13</sup>C{<sup>1</sup>H} NMR (126 MHz, CDCl<sub>3</sub>) δ 14.8, 35.3, 36.7 (q, <sup>3</sup>*J*<sub>C,F</sub> = 1.3 Hz, C-6*a*), 41.7, 65.7, 74.0 (q, <sup>2</sup>*J*<sub>C,F</sub> = 31.1 Hz, C-6), 85.3, 106.4, 115.0, 116.8, 123.1, 123.2 (q, <sup>1</sup>*J*<sub>C,F</sub> = 287.9 Hz, CF<sub>3</sub>), 125.4, 128.97 (2C), 129.0 (2C), 129.0 (2C), 129.3, 129.7 (2C), 131.4, 134.0, 136.0, 138.4, 148.7, 187.2, 190.6. HRMS (ESI) *m/z*: [M + H]<sup>+</sup> calcd for C<sub>29</sub>H<sub>24</sub>BrF<sub>3</sub>NO<sub>6</sub> 618.0734, found 618.0722.

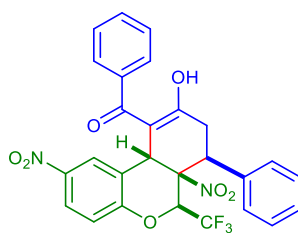

((6*S*\*,6*aR*\*,7*S*\*,10*aR*\*)-9-Hydroxy-2,6*a*-dinitro-7-phenyl-6-(trifluoromethyl)-6*a*,7,8,10*a*-tetrahydro-6*H*-benzo[*c*]chromen-10-yl)(phenyl)methanone (**5ga**). Obtained from **1g** (73 mg) and **3a** (63 mg) according to the general procedure. Yield 116 mg (82%), white powder, mp 222–223 °C. IR (ATR): 1605, 1585, 1557, 1530, 1476, 1382, 1344, 1271 cm<sup>-1</sup>; <sup>1</sup>H NMR (500 MHz, CDCl<sub>3</sub>) δ 2.78 (dd, *J* = 19.1, 5.2 Hz, 1H), 3.09 (dd, *J* = 19.1, 13.5 Hz, 1H), 3.58 (dd, *J* = 13.5, 5.2 Hz, 1H), 5.03 (q, <sup>3</sup>*J*<sub>H,F</sub> = 6.8 Hz, 1H), 5.28 (s, 1H), 7.19 (d, *J* = 8.9 Hz, 1H), 7.22–7.25 (m, 2H), 7.43–7.52 (m, 6H), 7.86–7.91 (m, 2H), 8.08 (d, *J* = 2.4 Hz, 1H), 8.13 (dd, *J* = 8.9, 2.4 Hz, 1H), 16.45 (s, 1H); <sup>19</sup>F NMR (376 MHz, CDCl<sub>3</sub>) δ 91.25 (d, *J* = 6.8 Hz, CF<sub>3</sub>); <sup>13</sup>C{<sup>1</sup>H} NMR (126 MHz, CDCl<sub>3</sub>) δ 35.1, 36.6 (q, <sup>3</sup>*J*<sub>C,F</sub> = 1.5 Hz, C-6*a*), 41.7, 74.4 (q, <sup>2</sup>*J*<sub>C,F</sub> = 31.5 Hz, C-6), 84.7, 105.7, 117.8, 122.9 (q, <sup>1</sup>*J*<sub>C,F</sub> = 287.3 Hz, CF<sub>3</sub>), 124.1, 125.3, 125.7, 127.6 (2C), 129.1 (2C), 129.2 (2C), 129.6 (2C), 129.7, 131.6, 133.3, 135.8, 143.5, 153.8, 186.9, 191.4. HRMS (ESI) *m/z*: [M + H]<sup>+</sup> calcd for C<sub>27</sub>H<sub>20</sub>F<sub>3</sub>N<sub>2</sub>O<sub>7</sub> 541.1217, found 541.1211.

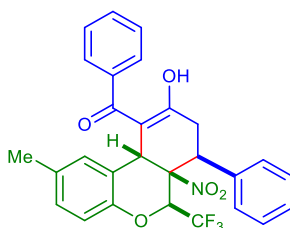

((6*S*\*,6*aR*\*,7*S*\*,10*aR*\*)-9-Hydroxy-2-methyl-6*a*-nitro-7-phenyl-6-(trifluoromethyl)-6*a*,7,8,10*a*-tetrahydro-6*H*-benzo[*c*]chromen-10-yl)(phenyl)methanone (**5ha**). Obtained from **1h** (65 mg) and **3a** (63 mg) according to the general procedure. Yield 116 mg (81%), white powder, mp 186–187 °C. IR (ATR): 1601, 1591, 1557, 1549, 1494, 1374, 1342, 1271 cm<sup>-1</sup>; <sup>1</sup>H NMR (500 MHz, CDCl<sub>3</sub>) δ 2.26 (s, 3H), 2.72 (dd, *J* = 19.1, 5.6 Hz, 1H), 3.05 (dd, *J* = 19.1, 13.4 Hz, 1H), 3.75 (dd, *J* = 13.4, 5.6 Hz, 1H), 4.89 (q, <sup>3</sup>*J*<sub>H,F</sub> = 7.1 Hz, 1H), 5.16 (s, 1H), 6.86 (s, 1H), 6.95 (d, *J* = 8.3 Hz, 1H), 7.04 (d, *J* = 8.3 Hz, 1H), 7.26–7.30 (m, 2H), 7.39–7.44 (m, 3H), 7.44–7.50 (m, 3H), 7.79–7.85 (m, 2H), 16.33 (s, 1H); <sup>19</sup>F NMR (376 MHz, CDCl<sub>3</sub>) δ 91.20 (d, *J* = 7.1 Hz, CF<sub>3</sub>); <sup>13</sup>C{<sup>1</sup>H} NMR (126 MHz, CDCl<sub>3</sub>) δ 20.9, 35.3, 36.6 (q, <sup>3</sup>*J*<sub>C,F</sub> = 1.3 Hz, C-6*a*), 41.5, 73.9 (q, <sup>2</sup>*J*<sub>C,F</sub> = 31.0 Hz, C-6), 85.7, 106.9, 116.7, 122.4, 123.4 (q, <sup>1</sup>*J*<sub>C,F</sub> = 287.9 Hz, CF<sub>3</sub>), 127.8 (2C), 128.8 (2C), 128.9 (2C), 129.3, 129.6, 129.7 (2C), 130.1, 131.3, 132.5, 134.2, 136.3, 146.8, 187.0, 190.6. HRMS (ESI) *m/z*: [M + H]<sup>+</sup> calcd for C<sub>28</sub>H<sub>23</sub>F<sub>3</sub>NO<sub>5</sub> 510.1523, found 510.1516.

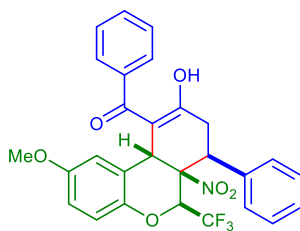

((6*S*\*,6*aR*\*,7*S*\*,10*aR*\*)-9-Hydroxy-2-methoxy-6*a*-nitro-7-phenyl-6-(trifluoromethyl)-6*a*,7,8,10*a*-tetrahydro-6*H*-benzo[*c*]chromen-10-yl)(phenyl)methanone (**5ia**). Obtained from **1i** (69 mg) and **3a** (63 mg) according to the general procedure. Yield 122 mg (92%), white powder, mp 146–147 °C. IR (ATR): 1603, 1553, 1492, 1467, 1373, 1357, 1271 cm<sup>-1</sup>; <sup>1</sup>H NMR (500 MHz, CDCl<sub>3</sub>) δ 2.73 (dd, *J* = 19.1, 5.6 Hz, 1H), 3.05 (dd, *J* = 19.1, 13.4 Hz, 1H), 3.73 (s, 3H), 3.77 (dd, *J* = 13.4, 5.6 Hz, 1H), 4.88 (q, <sup>3</sup>*J*<sub>H,F</sub> = 7.2 Hz, 1H), 5.22 (s, 1H), 6.56 (d, *J* = 2.7 Hz, 1H), 6.78 (dd, *J* = 8.9, 2.7 Hz, 1H), 6.98 (d, *J* = 8.9 Hz, 1H), 7.26–7.31 (m, 2H), 7.39–7.44 (m, 3H), 7.45–7.52 (m, 3H), 7.82–7.88 (m, 2H), 16.37 (s, 1H); <sup>19</sup>F NMR (471 MHz, CDCl<sub>3</sub>) δ 91.27 (d, *J* = 7.2 Hz, CF<sub>3</sub>); <sup>13</sup>C{<sup>1</sup>H} NMR (126 MHz, CDCl<sub>3</sub>) δ 35.4, 36.9 (br. s, C-6*a*), 41.6, 55.9, 74.0 (q, <sup>2</sup>*J*<sub>C,F</sub> = 30.9 Hz, C-6), 85.8, 106.9, 113.9, 115.4, 117.6, 123.4 (q, <sup>1</sup>*J*<sub>C,F</sub> = 288.1 Hz, CF<sub>3</sub>), 123.6, 127.8 (2C), 128.8 (2C), 129.0 (2C), 129.3, 129.8 (2C), 131.5, 134.3, 136.2, 142.7, 155.2, 187.3, 190.3. HRMS (ESI) *m/z*: [M + H]<sup>+</sup> calcd for C<sub>28</sub>H<sub>23</sub>F<sub>3</sub>NO<sub>6</sub> 526.1472, found 526.1474.

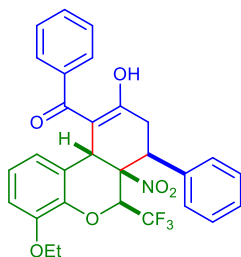

((6*S*\*,6*aR*\*,7*S*\*,10*aR*\*)-4-Ethoxy-9-hydroxy-6*a*-nitro-7-phenyl-6-(trifluoromethyl)-6*a*,7,8,10*a*-tetrahydro-6*H*-benzo[*c*]chromen-10-yl)(phenyl)methanone (**5ja**). Obtained from **1j** (72 mg) and **3a** (63 mg) according to the general procedure. Yield 121 mg (90%), white powder, mp 195–196 °C. IR (ATR): 1602, 1585, 1553, 1472, 1377, 1324, 1273 cm<sup>-1</sup>; <sup>1</sup>H NMR (500 MHz, CDCl<sub>3</sub>) δ 1.44 (t, *J* = 6.9 Hz, 3H), 2.72 (dd, *J* = 19.0, 5.5 Hz, 1H), 3.04 (dd, *J* = 19.0, 13.1 Hz, 1H), 3.78 (dd, *J* = 13.1, 5.5 Hz, 1H), 4.13 (q, *J* = 6.9 Hz, 2H), 5.04 (q, *J* = 6.9 Hz, 1H), 5.19 (s, 1H), 6.67 (d, <sup>3</sup>*J*<sub>H,F</sub> = 7.8 Hz, 1H), 6.85 (d, *J* = 7.8 Hz, 1H), 6.92 (t, *J* = 7.8 Hz, 1H), 7.23–7.32 (m, 2H), 7.37–7.52 (m, 6H), 7.78–7.86 (m, 2H), 16.28 (s, 1H); <sup>19</sup>F NMR (376 MHz, CDCl<sub>3</sub>) δ 91.43 (d, *J* = 6.9 Hz, CF<sub>3</sub>); <sup>13</sup>C{<sup>1</sup>H} NMR (126 MHz, CDCl<sub>3</sub>) δ 14.9, 35.4, 36.8 (br. s, C-6*a*), 41.6, 65.3, 73.9 (q, <sup>2</sup>*J*<sub>C,F</sub> = 31.0 Hz, C-6), 85.5, 107.0, 113.7, 120.5, 122.6, 123.3 (q, <sup>1</sup>*J*<sub>C,F</sub> = 287.8 Hz, CF<sub>3</sub>), 124.0, 127.9 (2C), 128.88 (2C), 128.9 (2C), 129.2, 129.7 (2C), 131.3, 134.3, 136.1, 139.2, 147.9, 187.2, 190.1. HRMS (ESI) *m/z*: [M + H]<sup>+</sup> calcd for C<sub>29</sub>H<sub>25</sub>F<sub>3</sub>NO<sub>6</sub> 540.1628, found 540.1627.

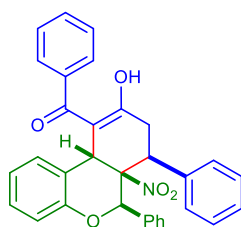

((6*S*\*,6*aR*\*,7*S*\*,10*aR*\*)-9-Hydroxy-6*a*-nitro-6,7-diphenyl-6*a*,7,8,10*a*-tetrahydro-6*H*-benzo[*c*]chromen-10-yl)(phenyl)methanone (**5ka**). Obtained from **1k** (64 mg) and **3a** (63 mg) according to the general procedure. Yield 113 mg (90%), white powder, mp 198–199 °C. IR (ATR): 1616, 1603, 1581, 1544, 1483, 1451, 1399, 1278, 1224 cm<sup>-1</sup>; <sup>1</sup>H NMR (500 MHz, CDCl<sub>3</sub>) δ 2.74 (dd, *J* = 19.0, 5.1 Hz, 1H), 3.11 (dd, *J* = 19.0, 13.6 Hz, 1H), 3.74 (dd, *J* = 13.6, 5.1 Hz, 1H), 5.07 (s, 1H), 5.45 (s, 1H), 6.83 (d, *J* = 7.5 Hz, 2H), 6.97 (t, *J* = 7.4 Hz, 1H), 7.03–7.09 (m, 2H), 7.13 (t, *J* = 7.5 Hz, 2H), 7.23–7.33 (m, 4H), 7.37–7.47 (m, 6H), 7.64 (d, *J* = 7.4 Hz, 2H), 16.44 (s, 1H); <sup>13</sup>C{<sup>1</sup>H} NMR (126 MHz, CDCl<sub>3</sub>) δ 35.58, 35.64, 41.4, 78.2, 91.2, 106.6, 116.6, 121.7, 123.3, 126.9 (2C), 127.8 (2C), 128.5 (2C), 128.6 (3C), 128.7 (2C), 129.1, 129.4, 129.5, 130.2 (2C), 131.0, 135.4, 135.9, 136.4, 151.1, 187.4, 191.5. HRMS (ESI) *m/z*: [M + H]<sup>+</sup> calcd for C<sub>32</sub>H<sub>26</sub>NO<sub>5</sub> 504.1805, found 504.1807.

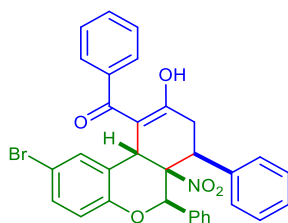

((6*R*\*,6*aR*\*,7*S*\*,10*aR*\*)-2-Bromo-9-hydroxy-6*a*-nitro-6,7-diphenyl-6*a*,7,8,10*a*-tetrahydro-6*H*-benzo[*c*]chromen-10-yl)(phenyl)methanone (**5la**). Obtained from **1l** (83 mg) and **3a** (63 mg) according to the general procedure. Yield 117 mg (80%), white powder, mp 197–198 °C. IR (ATR): 1622, 1596, 1544, 1472, 1454, 1398, 1263, 1227 cm<sup>-1</sup>; <sup>1</sup>H NMR (500 MHz, CDCl<sub>3</sub>) δ 2.78 (dd, *J* = 19.2, 5.4 Hz, 1H), 3.12 (dd, *J* = 19.2, 13.5 Hz, 1H), 3.67 (dd, *J* = 13.5, 5.4 Hz, 1H), 5.06 (s, 1H), 5.43 (s, 1H), 6.79 (d, *J* = 7.7 Hz, 2H), 6.94 (d, *J* = 8.6 Hz, 1H), 7.13–7.18 (m, 3H), 7.28–7.37 (m, 4H), 7.40 (d, *J* = 7.8 Hz, 2H), 7.41–7.47 (m, 4H), 7.61 (d, *J* = 7.5 Hz, 2H), 16.48 (s, 1H); <sup>13</sup>C{<sup>1</sup>H} NMR (126 MHz, CDCl<sub>3</sub>) δ 35.5 (2C), 41.5, 78.3, 90.7, 106.0, 114.1, 118.4, 125.4, 126.8 (2C), 127.6 (2C), 128.5 (2C), 128.7 (3C), 128.8 (2C), 129.6, 130.2 (2C), 131.2, 131.9, 132.4, 135.1, 135.4, 136.2, 150.2, 187.4, 191.9. HRMS (ESI) *m/z*: [M + Na]<sup>+</sup> calcd for C<sub>32</sub>H<sub>24</sub>BrNNaO<sub>5</sub> 604.0730, found 604.0727.



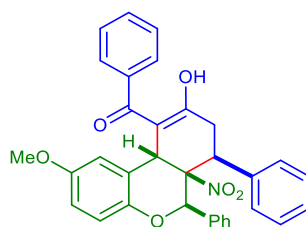

((6*R*\*,6*aR*\*,7*S*\*,10*aR*\*)-9-Hydroxy-2-methoxy-6*a*-nitro-6,7-diphenyl-6*a*,7,8,10*a*-tetrahydro-6*H*-benzo[*c*]chromen-10-yl)(phenyl)methanone (**5ma**). Obtained from **1m** (71 mg) and **3a** (63 mg) according to the general procedure. Yield 105 mg (79%), white powder, mp 185–186 °C. IR (ATR): 1600, 1577, 1541, 1489, 1429, 1403, 1264, 1237 cm<sup>-1</sup>; <sup>1</sup>H NMR (500 MHz, CDCl<sub>3</sub>) δ 2.75 (dd, *J* = 19.1, 5.4 Hz, 1H), 3.12 (dd, *J* = 19.1, 13.6 Hz, 1H), 3.75 (s, 3H), 3.77 (dd, *J* = 13.6, 5.4 Hz, 1H), 5.09 (s, 1H), 5.40 (s, 1H), 6.56 (s, 1H), 6.80–6.87 (m, 3H), 6.98 (d, *J* = 8.8 Hz, 1H), 7.14 (t, *J* = 7.6 Hz, 2H), 7.25–7.34 (m, 3H), 7.38–7.48 (m, 6H), 7.65 (d, *J* = 7.5 Hz, 2H), 16.50 (s, 1H); <sup>13</sup>C{<sup>1</sup>H} NMR (126 MHz, CDCl<sub>3</sub>) δ 35.6, 35.9, 41.5, 55.8, 78.1, 91.4, 106.6, 113.7, 115.5, 117.3, 124.0, 126.9 (2C), 127.8 (2C), 128.4 (2C), 128.6, 128.62 (2C), 128.7 (2C), 129.4, 130.3 (2C), 131.2, 135.4, 136.0, 136.4, 144.8, 154.3, 187.7, 191.4. HRMS (ESI) *m/z*: [M + Na]<sup>+</sup> calcd for C<sub>33</sub>H<sub>28</sub>NO<sub>6</sub> 534.1911, found 534.1907.

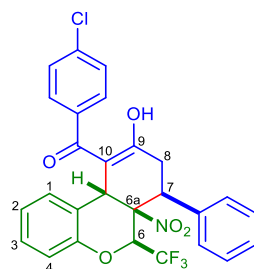

(4-Chlorophenyl)((6*S*\*,6*aR*\*,7*S*\*,10*aR*\*)-9-hydroxy-6*a*-nitro-7-phenyl-6-(trifluoromethyl)-6*a*,7,8,10*a*-tetrahydro-6*H*-benzo[*c*]chromen-10-yl)methanone (**5ab**). Obtained from **1a** (61 mg) and **3b** (71 mg) according to the general procedure. Yield 130 mg (98%), white powder, mp 163–164 °C. IR (ATR): 1634, 1585, 1549, 1484, 1454, 1374, 1273 cm<sup>-1</sup>; <sup>1</sup>H NMR (500 MHz, CDCl<sub>3</sub>) δ 2.73 (dd, *J* = 19.1, 5.6 Hz, 1H), 3.05 (dd, *J* = 19.1, 13.4 Hz, 1H), 3.74 (dd, *J* = 13.4, 5.6 Hz, 1H), 4.93 (q, <sup>3</sup>*J*<sub>H,F</sub> = 7.1 Hz, 1H), 5.12 (s, 1H), 7.01–7.03 (m, 2H), 7.09 (d, *J* = 8.1 Hz, 1H), 7.26–7.30 (m, 3H), 7.40–7.47 (m, 5H), 7.76–7.81 (m, 2H), 16.22 (s, 1H); <sup>19</sup>F NMR (376 MHz, CDCl<sub>3</sub>) δ 91.18 (d, *J* = 7.1 Hz, CF<sub>3</sub>); <sup>13</sup>C{<sup>1</sup>H} NMR (126 MHz, CDCl<sub>3</sub>) δ 35.3, 36.8 (q, <sup>3</sup>*J*<sub>C,F</sub> = 1.2 Hz, C-6*a*), 41.5, 74.0 (q, <sup>2</sup>*J*<sub>C,F</sub> = 31.0 Hz, C-6), 85.5, 106.8, 117.1, 122.7, 123.2, 123.3 (q, <sup>1</sup>*J*<sub>C,F</sub> = 287.8 Hz, CF<sub>3</sub>), 128.9 (2C), 129.0 (2C), 129.3 (2C), 129.3 (2C), 129.4, 129.7, 129.7, 134.0, 134.5, 137.8, 149.1, 187.3, 189.0. HRMS (ESI) *m/z*: [M + H]<sup>+</sup> calcd for C<sub>27</sub>H<sub>20</sub>ClF<sub>3</sub>NO<sub>5</sub> 530.0977, found 530.0976.

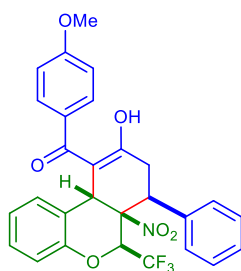

((6*S*\*,6*aR*\*,7*S*\*,10*aR*\*)-9-hydroxy-6*a*-nitro-7-phenyl-6-(trifluoromethyl)-6*a*,7,8,10*a*-tetrahydro-6*H*-benzo[*c*]chromen-10-yl)(4-methoxyphenyl)methanone (**5ac**). Obtained from **1a** (61 mg) and **3c** (70 mg) according to the general procedure. Yield 123 mg (94%), white powder, mp 154–155 °C. IR (ATR): 1597, 1584, 1547, 1484, 1454, 1374, 1272 cm<sup>-1</sup>; <sup>1</sup>H NMR (500 MHz, CDCl<sub>3</sub>) δ 2.70 (dd, *J* = 19.0, 5.6 Hz, 1H), 3.04 (dd, *J* = 19.0, 13.4 Hz, 1H), 3.74 (dd, *J* = 13.4, 5.6 Hz, 1H), 3.83 (s, 3H), 4.94 (q, <sup>3</sup>*J*<sub>H,F</sub> = 7.1 Hz, 1H), 5.27 (s, 1H), 6.95 (d, *J* = 8.8 Hz, 2H), 7.00 (t, *J* = 7.6 Hz, 1H), 7.07 (d, *J* = 8.4 Hz, 2H), 7.23–7.30 (m, 3H), 7.40–7.44 (m, 3H), 7.83 (d, *J* = 8.8 Hz, 2H), 16.43 (s, 1H); <sup>19</sup>F NMR (376 MHz, CDCl<sub>3</sub>) δ 91.20 (d, *J* = 7.1 Hz, CF<sub>3</sub>); <sup>13</sup>C{<sup>1</sup>H} NMR (126 MHz, CDCl<sub>3</sub>) δ 35.1, 36.8 (q, <sup>3</sup>*J*<sub>C,F</sub> = 1.4 Hz, C-6*a*), 41.4, 55.5, 74.0 (q, <sup>2</sup>*J*<sub>C,F</sub> = 31.1 Hz, C-6), 85.6, 106.6, 114.3 (2C), 116.9, 123.1, 123.1, 123.4 (q, <sup>1</sup>*J*<sub>C,F</sub> = 287.9 Hz, CF<sub>3</sub>), 128.8 (2C), 129.2, 129.3, 129.5, 129.7, 129.7 (2C), 130.0 (2C), 134.2, 149.0, 162.2, 186.1, 190.2. HRMS (ESI) *m/z*: [M + H]<sup>+</sup> calcd for C<sub>28</sub>H<sub>23</sub>F<sub>3</sub>NO<sub>6</sub> 526.1472, found 526.1468.

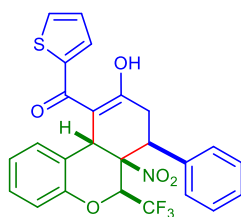

((6*S*\*,6*aR*\*,7*S*\*,10*aR*\*)-9-Hydroxy-6*a*-nitro-7-phenyl-6-(trifluoromethyl)-6*a*,7,8,10*a*-tetrahydro-6*H*-benzo[*c*]chromen-10-yl)(thiophen-2-yl)methanone (**5ad**). Obtained from **1a** (61 mg) and **3d** (64 mg) according to the general procedure. Yield 119 mg (95%), white powder, mp 168–169 °C. IR (ATR): 1697, 1582, 1547, 1484, 1454, 1374, 1278 cm<sup>-1</sup>; <sup>1</sup>H NMR (500 MHz, CDCl<sub>3</sub>) δ 2.74 (dd, *J* = 19.2, 5.7 Hz, 1H), 3.03 (dd, *J* = 19.2, 13.4 Hz, 1H), 3.78 (dd, *J* = 13.4, 5.7 Hz, 1H), 4.96 (q, <sup>3</sup>*J*<sub>H,F</sub> = 7.1 Hz, 1H), 5.41 (s, 1H), 7.01–7.06 (m, 1H), 7.12 (dd, *J* = 4.8, 4.1 Hz, 1H), 7.17 (dd, *J* = 8.2, 0.9 Hz, 1H), 7.22 (d, *J* = 7.9 Hz, 1H), 7.29 (dd, *J* = 5.6, 3.7 Hz, 2H), 7.33 (t, *J* = 7.8 Hz, 1H), 7.40–7.45 (m, 3H), 7.67–7.71 (m, 2H), 17.15 (s, 1H); <sup>19</sup>F NMR (376 MHz, CDCl<sub>3</sub>) δ 90.94 (d, *J* = 7.1 Hz, CF<sub>3</sub>); <sup>13</sup>C{<sup>1</sup>H} NMR (126 MHz, CDCl<sub>3</sub>) δ 35.3, 37.4 (q, <sup>3</sup>*J*<sub>C,F</sub> = 1.6 Hz, C-6*a*), 41.3, 73.9 (q, <sup>2</sup>*J*<sub>C,F</sub> = 31.0 Hz, C-6), 85.5, 105.7, 117.1, 121.9, 123.1, 123.5 (q, <sup>1</sup>*J*<sub>C,F</sub> = 286.3 Hz, CF<sub>3</sub>), 128.7, 128.8 (2C), 129.3, 129.8 (2C), 129.9, 130.3, 132.2, 133.4, 134.1, 139.6, 149.6, 181.2, 187.4. HRMS (ESI) *m/z*: [M + H]<sup>+</sup> calcd for C<sub>25</sub>H<sub>19</sub>F<sub>3</sub>NO<sub>5</sub>S 502.0931, found 502.0924.

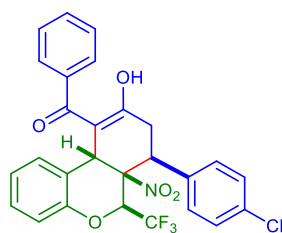

((6*S*\*,6*aR*\*,7*S*\*,10*aR*\*)-7-(4-Chlorophenyl)-9-hydroxy-6*a*-nitro-6-(trifluoromethyl)-6*a*,7,8,10*a*-tetrahydro-6*H*-benzo[*c*]chromen-10-yl)(phenyl)methanone (**5ae**). Obtained from **1a** (61 mg) and **3e** (71 mg) according to the general procedure. Yield 125 mg (94%), white powder, mp 162–163 °C. IR (ATR): 1645, 1586, 1549, 1485, 1456, 1374, 1277 cm<sup>-1</sup>; <sup>1</sup>H NMR (500 MHz, CDCl<sub>3</sub>) δ 2.70 (dd, *J* = 19.0, 5.5 Hz, 1H), 2.99 (dd, *J* = 19.0, 13.4 Hz, 1H), 3.72 (dd, *J* = 13.4, 5.5 Hz, 1H), 4.88 (q, <sup>3</sup>*J*<sub>H,F</sub> = 7.0 Hz, 1H), 5.21 (s, 1H), 7.02 (dd, *J* = 11.0, 4.1 Hz, 1H), 7.07 (t, *J* = 8.4 Hz, 2H), 7.22 (d, *J* = 8.6 Hz, 2H), 7.23–7.27 (m, 1H), 7.40 (d, *J* = 8.6 Hz, 2H), 7.44–7.51 (m, 3H), 7.83 (dd, *J* = 7.5, 2.0 Hz, 2H), 16.31 (s, 1H); <sup>19</sup>F NMR (376 MHz, CDCl<sub>3</sub>) δ 91.01 (d, *J* = 7.0 Hz, CF<sub>3</sub>); <sup>13</sup>C{<sup>1</sup>H} NMR (126 MHz, CDCl<sub>3</sub>) δ 35.2, 36.7 (d, <sup>3</sup>*J*<sub>C,F</sub> = 1.1 Hz, C-6*a*), 41.0, 74.0 (q, <sup>2</sup>*J*<sub>C,F</sub> = 31.2 Hz, C-6), 85.5, 106.7, 116.9, 122.9, 123.2, 123.2 (q, <sup>1</sup>*J*<sub>C,F</sub> = 287.8 Hz, CF<sub>3</sub>), 127.8 (2C), 129.0 (2C), 129.1 (2C), 129.2, 129.7, 131.1 (2C), 131.5, 132.7, 135.4, 136.1, 148.9, 186.5, 190.6. HRMS (ESI) *m/z*: [M + H]<sup>+</sup> calcd for C<sub>27</sub>H<sub>20</sub>ClF<sub>3</sub>NO<sub>5</sub> 530.0977, found 530.0985.

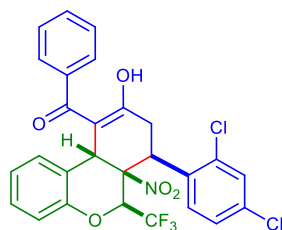

((6*S*\*,6*aR*\*,7*S*\*,10*aR*\*)-7-(2,4-Dichlorophenyl)-9-hydroxy-6*a*-nitro-6-(trifluoromethyl)-6*a*,7,8,10*a*-tetrahydro-6*H*-benzo[*c*]chromen-10-yl)(phenyl)methanone (**5af**). Obtained from **1a** (61 mg) and **3f** (80 mg) according to the general procedure. Yield 132 mg (94%), white powder, mp 162–163 °C. IR (ATR): 1645, 1586, 1549, 1485, 1456, 1374, 1277 cm<sup>-1</sup>; <sup>1</sup>H NMR (500 MHz, CDCl<sub>3</sub>) δ 2.61 (dd, *J* = 18.2, 7.4 Hz, 1H), 2.67 (dd, *J* = 18.2, 8.8 Hz, 1H), 4.54 (dd, *J* = 8.8, 7.4 Hz, 1H), 5.11 (s, 1H), 5.15 (q, <sup>3</sup>*J*<sub>H,F</sub> = 6.5 Hz, 1H), 6.99 (d, *J* = 8.0 Hz, 1H), 7.04 (t, *J* = 7.5 Hz, 1H), 7.10 (d, *J* = 8.5 Hz, 1H), 7.16 (d, *J* = 7.6 Hz, 1H), 7.23–7.31 (m, 2H), 7.42–7.52 (m, 4H), 7.75–7.80 (m, 2H), 16.35 (s, 1H); <sup>19</sup>F NMR (376 MHz, CDCl<sub>3</sub>) δ 92.20 (d, *J* = 6.5 Hz, CF<sub>3</sub>); <sup>13</sup>C{<sup>1</sup>H} NMR (126 MHz, CDCl<sub>3</sub>) δ 37.5 (q, <sup>3</sup>*J*<sub>C,F</sub> = 1.7 Hz, C-6*a*), 38.1, 38.2, 75.0 (q, <sup>2</sup>*J*<sub>C,F</sub> = 30.8 Hz, C-6), 86.6, 107.2, 117.4, 122.0, 123.2 (q, <sup>1</sup>*J*<sub>C,F</sub> = 290.0 Hz, CF<sub>3</sub>), 123.3, 127.7 (2C), 128.0, 128.6, 129.0 (2C), 129.6, 130.0, 130.3, 131.6, 132.9, 135.3, 135.6, 136.3, 149.9, 188.1, 189.6. HRMS (ESI) *m/z*: [M + H]<sup>+</sup> calcd for C<sub>27</sub>H<sub>19</sub>Cl<sub>2</sub>F<sub>3</sub>NO<sub>5</sub> 564.0587, found 564.0582.

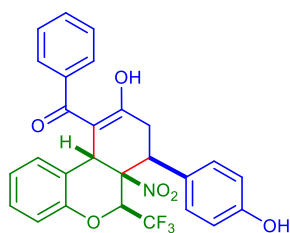

((6*S*\*,6*aR*\*,7*S*\*,10*aR*\*)-9-Hydroxy-7-(4-hydroxyphenyl)-6*a*-nitro-6-(trifluoromethyl)-6*a*,7,8,10*a*-tetrahydro-6*H*-benzo[*c*]chromen-10-yl)(phenyl)methanone (**5ag**). Obtained from **1a** (61 mg) and **3g** (67 mg) according to the general procedure. Yield 99 mg (77%), yellow powder, mp 159–160 °C. IR (ATR): 3330, 1600, 1585, 1549, 1484, 1454, 1371, 1268 cm<sup>-1</sup>; <sup>1</sup>H NMR (500 MHz, CDCl<sub>3</sub>) δ 2.69 (dd, *J* = 19.1, 5.5 Hz, 1H), 2.98 (dd, *J* = 19.1, 13.4 Hz, 1H), 3.68 (dd, *J* = 13.4, 5.5 Hz, 1H), 4.92 (s, 1H), 4.93 (q, <sup>3</sup>*J*<sub>H,F</sub> = 7.1 Hz, 1H), 5.18 (s, 1H), 6.87 (d, *J* = 8.7 Hz, 2H), 7.00 (t, *J* = 7.5 Hz, 1H), 7.03–7.09 (m, 2H), 7.14 (d, *J* = 8.7 Hz, 2H), 7.24 (d, *J* = 7.6 Hz, 1H), 7.44–7.49 (m, 3H), 7.80–7.84 (m, 2H), 16.31 (s, 1H); <sup>19</sup>F NMR (376 MHz, CDCl<sub>3</sub>) δ 91.15 (d, *J* = 7.1 Hz, CF<sub>3</sub>); <sup>13</sup>C{<sup>1</sup>H} NMR (126 MHz, CDCl<sub>3</sub>) δ 35.6, 36.7 (q, <sup>3</sup>*J*<sub>C,F</sub> = 1.3 Hz, C-6*a*), 40.9, 74.0 (q, <sup>2</sup>*J*<sub>C,F</sub> = 30.9 Hz, C-6), 85.6, 106.9, 115.7 (2C), 116.9, 123.0, 123.1, 123.4 (q, <sup>1</sup>*J*<sub>C,F</sub> = 287.7 Hz, CF<sub>3</sub>), 126.2, 127.8 (2C), 128.9 (2C), 129.2, 129.5, 131.0 (2C), 131.4, 136.1, 149.1, 156.3, 187.2, 190.3. HRMS (ESI) *m/z*: [M + Na]<sup>+</sup> calcd for C<sub>27</sub>H<sub>20</sub>F<sub>3</sub>NNaO<sub>6</sub> 534.1135, found 534.1132.

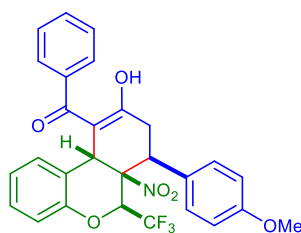

((6*S*\*,6*aR*\*,7*S*\*,10*aR*\*)-9-Hydroxy-7-(4-methoxyphenyl)-6*a*-nitro-6-(trifluoromethyl)-6*a*,7,8,10*a*-tetrahydro-6*H*-benzo[*c*]chromen-10-yl)(phenyl)methanone (**5ah**). Obtained from **1a** (61 mg) and **3h** (70 mg) according to the general procedure. Yield 129 mg (98%), white powder, mp 181–182 °C. IR (ATR): 1610, 1601, 1585, 1547, 1487, 1454, 1373, 1258 cm<sup>-1</sup>; <sup>1</sup>H NMR (500 MHz, CDCl<sub>3</sub>) δ 2.70 (dd, *J* = 19.1, 5.5 Hz, 1H), 2.99 (dd, *J* = 19.1, 13.4 Hz, 1H), 3.70 (dd, *J* = 13.4, 5.5 Hz, 1H), 3.85 (s, 3H), 4.94 (q, <sup>3</sup>*J*<sub>H,F</sub> = 7.1 Hz, 1H), 5.19 (s, 1H), 6.94 (d, *J* = 8.8 Hz, 2H), 7.00 (t, *J* = 7.5 Hz, 1H), 7.06 (dd, *J* = 15.0, 8.0 Hz, 2H), 7.19 (d, *J* = 8.8 Hz, 2H), 7.24 (d, *J* = 7.6 Hz, 1H), 7.43–7.50 (m, 3H), 7.81–7.84 (m, 2H), 16.32 (s, 1H); <sup>19</sup>F NMR (376 MHz, CDCl<sub>3</sub>) δ 91.16 (d, *J* = 7.1 Hz, CF<sub>3</sub>); <sup>13</sup>C{<sup>1</sup>H} NMR (126 MHz, CDCl<sub>3</sub>) δ 35.5, 36.6 (br. s, C-6*a*), 40.8, 55.4, 74.0 (q, <sup>2</sup>*J*<sub>C,F</sub> = 31.1 Hz, C-6), 85.6, 106.9, 114.2 (2C), 116.9, 123.0, 123.1, 123.4 (q, <sup>1</sup>*J*<sub>C,F</sub> = 287.5 Hz, CF<sub>3</sub>), 125.9, 127.8 (2C), 128.9 (2C), 129.2, 129.5, 130.8 (2C), 131.4, 136.1, 149.1, 160.2, 187.2, 190.3. HRMS (ESI) *m/z*: [M + H]<sup>+</sup> calcd for C<sub>28</sub>H<sub>23</sub>F<sub>3</sub>NO<sub>6</sub> 526.1472, found 526.1467.

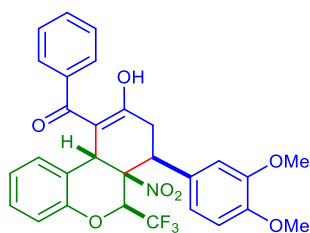

((6*S*\*,6*aR*\*,7*S*\*,10*aR*\*)-7-(3,4-Methoxyphenyl)-9-hydroxy-6*a*-nitro-6-(trifluoromethyl)-6*a*,7,8,10*a*-tetrahydro-6*H*-benzo[*c*]chromen-10-yl)(phenyl)methanone (**5ai**). Obtained from **1a** (61 mg) and **3i** (78 mg) according to the general procedure. Yield 126 mg (90%), light-yellow powder, mp 183–184 °C. IR (ATR): 1607, 1595, 1583, 1552, 1485, 1453, 1373, 1249 cm<sup>-1</sup>; <sup>1</sup>H NMR (500 MHz, CDCl<sub>3</sub>) δ 2.72 (dd, *J* = 19.0, 5.5 Hz, 1H), 2.99 (dd, *J* = 19.0, 13.4 Hz, 1H), 3.69 (dd, *J* = 13.4, 5.5 Hz, 1H), 3.90 (s, 3H), 3.92 (s, 3H), 4.97 (q, <sup>3</sup>*J*<sub>H,F</sub> = 7.1 Hz, 1H), 5.20 (s, 1H), 6.78 (s, 1H), 6.83 (dd, *J* = 8.4, 1.8 Hz, 1H), 6.89 (d, *J* = 8.3 Hz, 1H), 6.99–7.05 (m, 2H), 7.08 (d, *J* = 7.8 Hz, 1H), 7.24 (d, *J* = 7.7 Hz, 1H), 7.44–7.50 (m, 3H), 7.81–7.85 (m, 2H), 16.34 (s, 1H); <sup>19</sup>F NMR (376 MHz, CDCl<sub>3</sub>) δ 91.16 (d, *J* = 7.1 Hz, CF<sub>3</sub>); <sup>13</sup>C{<sup>1</sup>H} NMR (126 MHz, CDCl<sub>3</sub>) δ 35.5, 36.7 (q, <sup>3</sup>*J*<sub>C,F</sub> = 1.5 Hz, C-6*a*), 41.3, 56.0, 56.1, 74.0 (q, <sup>2</sup>*J*<sub>C,F</sub> = 30.8 Hz, C-6), 85.6, 106.8, 111.1, 112.6, 116.7, 122.3, 123.0, 123.1, 123.4 (q, <sup>1</sup>*J*<sub>C,F</sub> = 287.4 Hz, CF<sub>3</sub>), 126.2, 127.8 (2C), 128.9 (2C), 129.2, 129.6, 131.4, 136.1, 148.9, 149.1, 149.8, 187.2, 190.4. HRMS (ESI) *m/z*: [M + H]<sup>+</sup> calcd for C<sub>29</sub>H<sub>25</sub>F<sub>3</sub>NO<sub>7</sub> 556.1578, found 556.1574.

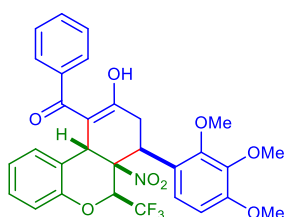

((6*S*\*,6*aR*\*,7*S*\*,10*aR*\*)-9-Hydroxy-6*a*-nitro-6-(trifluoromethyl)-7-(3,4,5-methoxyphenyl)-6*a*,7,8,10*a*-tetrahydro-6*H*-benzo[*c*]chromen-10-yl)(phenyl)methanone (**5aj**). Obtained from **1a** (61 mg) and **3j** (85 mg) according to the general procedure. Yield 125 mg (85%), light-yellow powder, mp 171–172 °C. IR (ATR): 1592, 1552, 1484, 1452, 1372, 1257 cm<sup>-1</sup>; <sup>1</sup>H NMR (500 MHz, CDCl<sub>3</sub>) δ 2.73 (dd, *J* = 19.0, 5.5 Hz, 1H), 2.98 (dd, *J* = 19.0, 13.4 Hz, 1H), 3.66 (dd, *J* = 13.4, 5.5 Hz, 1H), 3.87 (s, 6H), 3.91 (s, 3H), 5.01 (q, <sup>3</sup>*J*<sub>H,F</sub> = 7.1 Hz, 1H), 5.21 (s, 1H), 6.48 (s, 2H), 6.98–7.05 (m, 2H), 7.09 (d, *J* = 7.9 Hz, 1H), 7.24 (d, *J* = 8.0 Hz, 1H), 7.43–7.51 (m, 3H), 7.80–7.86 (m, 2H), 16.34 (s, 1H); <sup>19</sup>F NMR (376 MHz, CDCl<sub>3</sub>) δ 91.21 (d, *J* = 7.1 Hz, CF<sub>3</sub>); <sup>13</sup>C{<sup>1</sup>H} NMR (126 MHz, CDCl<sub>3</sub>) δ 35.6, 36.8 (q, <sup>3</sup>*J*<sub>C,F</sub> = 1.1 Hz, C-6*a*), 41.9, 56.4 (2C), 61.1, 74.0 (q, <sup>2</sup>*J*<sub>C,F</sub> = 31.1 Hz, C-6), 85.7, 106.8, 107.1 (2C), 116.7, 123.0, 123.2, 123.4 (q, <sup>1</sup>*J*<sub>C,F</sub> = 287.7 Hz, CF<sub>3</sub>), 127.8 (2C), 128.9 (2C), 129.2, 129.3, 129.6, 131.4, 136.1, 139.0, 149.1, 153.3 (2C), 187.0, 190.5. HRMS (ESI) *m/z*: [M + H]<sup>+</sup> calcd for C<sub>30</sub>H<sub>27</sub>F<sub>3</sub>NO<sub>8</sub> 586.1683, found 586.1686.

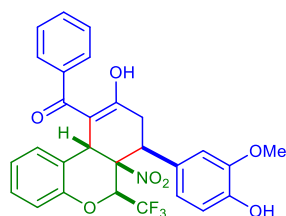

((6*S*\*,6*aR*\*,7*S*\*,10*aR*\*)-9-Hydroxy-7-(4-hydroxy-3-methoxyphenyl)-6*a*-nitro-6-(trifluoromethyl)-6*a*,7,8,10*a*-tetrahydro-6*H*-benzo[*c*]chromen-10-yl)(phenyl)methanone (**5ak**). Obtained from **1a** (61 mg) and **3k** (74 mg) according to the general procedure. Yield 134 mg (98%), yellow powder, mp 127–128 °C. IR (ATR): 3505, 1610, 1585, 1520, 1487, 1454, 1376, 1250 cm<sup>-1</sup>; <sup>1</sup>H NMR (500 MHz, CDCl<sub>3</sub>) δ 2.72 (dd, *J* = 18.9, 5.3 Hz, 1H), 2.97 (dd, *J* = 18.9, 13.5 Hz, 1H), 3.67 (dd, *J* = 13.5, 5.3 Hz, 1H), 3.92 (s, 3H), 4.98 (q, <sup>3</sup>*J*<sub>H,F</sub> = 7.0 Hz, 1H), 5.19 (s, 1H), 5.72 (s, 1H), 6.73 (s, 1H), 6.79 (d, *J* = 7.9 Hz, 1H), 6.93 (d, *J* = 8.1 Hz, 1H), 6.97–7.12 (m, 3H), 7.23 (d, *J* = 7.5 Hz, 1H), 7.47 (s, 3H), 7.79–7.86 (m, 2H), 16.34 (s, 1H); <sup>19</sup>F NMR (376 MHz, CDCl<sub>3</sub>) δ 91.16 (d, *J* = 7.0 Hz, CF<sub>3</sub>); <sup>13</sup>C{<sup>1</sup>H} NMR (126 MHz, CDCl<sub>3</sub>) δ 35.6, 36.7 (br. s, C-6a), 41.4, 56.2, 74.0 (q, <sup>2</sup>*J*<sub>C,F</sub> = 31.0 Hz, C-6), 85.7, 106.8, 111.7, 114.5, 116.8, 122.9, 123.1, 123.2, 123.4 (q, <sup>1</sup>*J*<sub>C,F</sub> = 287.3 Hz, CF<sub>3</sub>), 125.7, 127.8 (2C), 128.9 (2C), 129.2, 129.5, 131.4, 136.1, 146.5, 146.6, 149.1, 187.2, 190.4. HRMS (ESI) *m/z*: [M + H]<sup>+</sup> calcd for C<sub>28</sub>H<sub>23</sub>F<sub>3</sub>NO<sub>7</sub> 542.1421, found 542.1412.

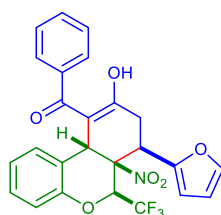

((6*S*\*,6*aS*\*,7*S*\*,10*aR*\*)-7-(Furan-2-yl)-9-hydroxy-6*a*-nitro-6-(trifluoromethyl)-6*a*,7,8,10*a*-tetrahydro-6*H*-benzo[*c*]chromen-10-yl)(phenyl)methanone (**5al**). Obtained from **1a** (61 mg) and **3l** (60 mg) according to the general procedure. Yield 118 mg (97%), white powder, mp 159–160 °C. IR (ATR): 1610, 1603, 1585, 1553, 1485, 1455, 1375, 1279 cm<sup>-1</sup>; <sup>1</sup>H NMR (500 MHz, CDCl<sub>3</sub>) δ 2.81 (dd, *J* = 19.3, 5.8 Hz, 1H), 3.03 (dd, *J* = 19.3, 13.2 Hz, 1H), 3.85 (dd, *J* = 13.2, 5.8 Hz, 1H), 5.21 (s, 1H), 5.34 (q, <sup>3</sup>*J*<sub>H,F</sub> = 7.1 Hz, 1H), 6.40 (d, *J* = 2.9 Hz, 1H), 6.43–6.50 (m, 1H), 6.94–7.07 (m, 3H), 7.22 (t, *J* = 7.6 Hz, 1H), 7.42–7.50 (m, 3H), 7.51 (s, 1H), 7.80–7.87 (m, 2H), 16.36 (s, 1H); <sup>19</sup>F NMR (376 MHz, CDCl<sub>3</sub>) δ 90.72 (d, *J* = 7.1 Hz, CF<sub>3</sub>); <sup>13</sup>C{<sup>1</sup>H} NMR (126 MHz, CDCl<sub>3</sub>) δ 32.9, 36.0, 36.2 (q, <sup>3</sup>*J*<sub>C,F</sub> = 1.4 Hz), 74.2 (q, <sup>2</sup>*J*<sub>C,F</sub> = 31.3 Hz), 84.7, 106.4, 110.7, 111.0, 117.0, 122.6, 123.1, 123.3 (q, <sup>1</sup>*J*<sub>C,F</sub> = 287.3 Hz), 127.8 (2C), 128.9 (2C), 129.0, 129.5, 131.4, 136.1, 143.6, 148.4, 149.2, 185.8, 191.0. HRMS (ESI) *m/z*: [M + Na]<sup>+</sup> calcd for C<sub>25</sub>H<sub>18</sub>F<sub>3</sub>NNaO<sub>6</sub> 508.0978, found 508.0979.

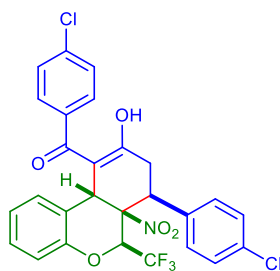

(4-Chlorophenyl)((6*S*\*,6*aR*\*,7*S*\*,10*aR*\*)-7-(4-chlorophenyl)-9-hydroxy-6*a*-nitro-6-(trifluoromethyl)-6*a*,7,8,10*a*-tetrahydro-6*H*-benzo[*c*]chromen-10-yl)methanone (**5am**). Obtained from **1a** (61 mg) and **3m** (80 mg) according to the general procedure. Yield 131 mg (93%), white powder, mp 212–213 °C. IR (ATR): 1612, 1585, 1551, 1495, 1456, 1369, 1264 cm<sup>-1</sup>; <sup>1</sup>H NMR (500 MHz, CDCl<sub>3</sub>) δ 2.70 (dd, *J* = 19.0, 5.5 Hz, 1H), 2.99 (dd, *J* = 19.0, 13.4 Hz, 1H), 3.72 (dd, *J* = 13.4, 5.5 Hz, 1H), 4.88 (q, <sup>3</sup>*J*<sub>H,F</sub> = 7.0 Hz, 1H), 5.13 (s, 1H), 6.99–7.05 (m, 2H), 7.08 (d, *J* = 8.1 Hz, 1H), 7.21 (d, *J* = 8.5 Hz, 2H), 7.25–7.30 (m, 1H), 7.41 (d, *J* = 8.5 Hz, 2H), 7.45 (d, *J* = 8.5 Hz, 2H), 7.79 (d, *J* = 8.5 Hz, 2H), 16.20 (s, 1H); <sup>19</sup>F NMR (376 MHz, CDCl<sub>3</sub>) δ 91.00 (d, *J* = 7.0 Hz, CF<sub>3</sub>); <sup>13</sup>C{<sup>1</sup>H} NMR (126 MHz, CDCl<sub>3</sub>) δ 35.2, 36.7 (q, <sup>3</sup>*J*<sub>C,F</sub> = 1.3 Hz, C-6*a*), 41.0, 74.0 (q, <sup>2</sup>*J*<sub>C,F</sub> = 31.2 Hz, C-6), 85.4, 106.7, 117.1, 122.6, 123.2 (q, <sup>1</sup>*J*<sub>C,F</sub> = 287.7 Hz, CF<sub>3</sub>), 123.3, 128.9, 129.1 (2C), 129.3 (2C), 129.3 (2C), 129.8, 131.1 (2C), 132.5, 134.4, 135.5, 137.8, 148.9, 186.6, 189.4. HRMS (ESI) *m/z*: [M + H]<sup>+</sup> calcd for C<sub>27</sub>H<sub>19</sub>Cl<sub>2</sub>F<sub>3</sub>NO<sub>5</sub> 564.0587, found 564.0578.

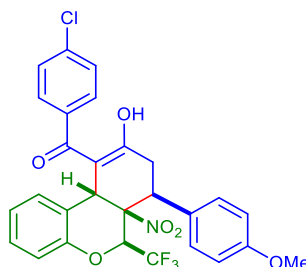

(4-Chlorophenyl)((6*S*\*,6*aR*\*,7*S*\*,10*aR*\*)-9-hydroxy-7-(4-methoxyphenyl)-6*a*-nitro-6-(trifluoromethyl)-6*a*,7,8,10*a*-tetrahydro-6*H*-benzo[*c*]chromen-10-yl)methanone (**5an**). Obtained from **1a** (61 mg) and **3n** (79 mg) according to the general procedure. Yield 131 mg (93%), white powder, mp 230–231 °C. IR (ATR): 1609, 1585, 1548, 1487, 1457, 1367, 1258 cm<sup>-1</sup>; <sup>1</sup>H NMR (500 MHz, CDCl<sub>3</sub>) δ 2.70 (dd, *J* = 19.1, 5.5 Hz, 1H), 2.99 (dd, *J* = 19.1, 13.5 Hz, 1H), 3.69 (dd, *J* = 13.5, 5.5 Hz, 1H), 3.85 (s, 3H), 4.93 (q, <sup>3</sup>*J*<sub>H,F</sub> = 7.1 Hz, 1H), 5.10 (s, 1H), 6.94 (d, *J* = 8.7 Hz, 2H), 6.98–7.03 (m, 2H), 7.07 (d, *J* = 8.1 Hz, 1H), 7.18 (d, *J* = 8.7 Hz, 2H), 7.24–7.29 (m, 1H), 7.44 (d, *J* = 8.5 Hz, 2H), 7.78 (d, *J* = 8.5 Hz, 2H), 16.22 (s, 1H); <sup>19</sup>F NMR (376 MHz, CDCl<sub>3</sub>) δ 91.14 (d, *J* = 7.1 Hz, CF<sub>3</sub>); <sup>13</sup>C{<sup>1</sup>H} NMR (126 MHz, CDCl<sub>3</sub>) δ 35.5, 36.7 (q, <sup>3</sup>*J*<sub>C,F</sub> = 1.5 Hz, C-6*a*), 40.9, 55.5, 74.0 (q, <sup>2</sup>*J*<sub>C,F</sub> = 30.9 Hz, C-6), 85.6, 106.9, 114.2 (2C), 117.0, 122.8, 123.1, 123.4 (q, <sup>1</sup>*J*<sub>C,F</sub> = 287.7 Hz, CF<sub>3</sub>), 125.8, 128.9, 129.3 (2C), 129.3 (2C), 129.7, 130.8 (2C), 134.5, 137.7, 149.1, 160.3, 187.3, 189.1. HRMS (ESI) *m/z*: [M + H]<sup>+</sup> calcd for

C<sub>28</sub>H<sub>22</sub>ClF<sub>3</sub>NO<sub>6</sub> 560.1082, found 564.1078.

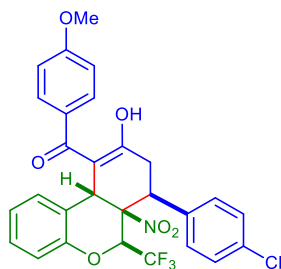

((6*S*\*,6*aR*\*,7*S*\*,10*aR*\*)-7-(4-Chlorophenyl)-9-hydroxy-6*a*-nitro-6-(trifluoromethyl)-6*a*,7,8,10*a*-tetrahydro-6*H*-benzo[*c*]chromen-10-yl)(4-methoxyphenyl)methanone (**5ao**). Obtained from **1a** (61 mg) and **3o** (79 mg) according to the general procedure. Yield 132 mg (94%), white powder, mp 195–196 °C. IR (ATR): 1607, 1585, 1549, 1490, 1454, 1366, 1252 cm<sup>-1</sup>; <sup>1</sup>H NMR (500 MHz, CDCl<sub>3</sub>) δ 2.68 (dd, *J* = 18.9, 5.5 Hz, 1H), 2.98 (dd, *J* = 18.9, 13.4 Hz, 1H), 3.71 (dd, *J* = 13.4, 5.5 Hz, 1H), 3.83 (s, 3H), 4.88 (q, <sup>3</sup>*J*<sub>H,F</sub> = 7.1 Hz, 1H), 5.28 (s, 1H), 6.96 (d, *J* = 8.8 Hz, 2H), 7.01 (d, *J* = 7.5 Hz, 1H), 7.06 (dd, *J* = 7.9, 3.9 Hz, 2H), 7.19–7.28 (m, 3H), 7.40 (d, *J* = 8.5 Hz, 2H), 7.83 (d, *J* = 8.8 Hz, 2H), 16.42 (s, 1H); <sup>19</sup>F NMR (376 MHz, CDCl<sub>3</sub>) δ 91.02 (d, *J* = 7.1 Hz, CF<sub>3</sub>); <sup>13</sup>C{<sup>1</sup>H} NMR (126 MHz, CDCl<sub>3</sub>) δ 35.0, 36.7 (br. s, C-6*a*), 40.9, 55.5, 73.9 (q, <sup>2</sup>*J*<sub>C,F</sub> = 31.0 Hz, C-6), 85.5, 106.4, 114.3 (2C), 116.9, 123.0, 123.2 (q, *J* = 287.7 Hz, CF<sub>3</sub>), 123.3, 128.5, 129.0 (2C), 129.3, 129.6, 130.0 (2C), 131.1 (2C), 132.7, 135.3, 148.9, 162.2, 185.4, 190.5. HRMS (ESI) *m/z*: [M + H]<sup>+</sup> calcd for C<sub>28</sub>H<sub>22</sub>ClF<sub>3</sub>NO<sub>6</sub> 560.1082, found 564.1076.

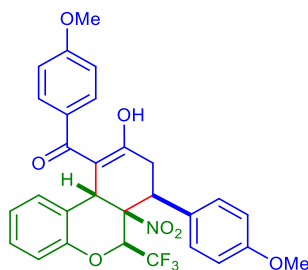

((6*S*\*,6*aR*\*,7*S*\*,10*aR*\*)-9-Hydroxy-7-(4-methoxyphenyl)-6*a*-nitro-6-(trifluoromethyl)-6*a*,7,8,10*a*-tetrahydro-6*H*-benzo[*c*]chromen-10-yl)(4-methoxyphenyl)methanone (**5ap**). Obtained from **1a** (61 mg) and **3p** (79 mg) according to the general procedure. Yield 131 mg (94%), yellow powder, mp 189–190 °C. IR (ATR): 1606, 1583, 1553, 1483, 1454, 1370, 1249 cm<sup>-1</sup>; <sup>1</sup>H NMR (500 MHz, CDCl<sub>3</sub>) δ 2.68 (dd, *J* = 19.1, 5.4 Hz, 1H), 2.98 (dd, *J* = 19.1, 13.5 Hz, 1H), 3.69 (dd, *J* = 13.5, 5.4 Hz, 1H), 3.83 (s, 3H), 3.85 (s, 3H), 4.94 (q, <sup>3</sup>*J*<sub>H,F</sub> = 7.0 Hz, 1H), 5.25 (s, 1H), 6.90–7.02 (m, 5H), 7.06 (d, *J* = 7.8 Hz, 2H), 7.19 (d, *J* = 8.7 Hz, 2H), 7.21–7.26 (m, 1H), 7.82 (d, *J* = 8.7 Hz, 2H), 16.43 (s, 1H); <sup>19</sup>F NMR (376 MHz, CDCl<sub>3</sub>) δ 91.16 (d, *J* = 7.0 Hz, CF<sub>3</sub>); <sup>13</sup>C{<sup>1</sup>H} NMR (126 MHz, CDCl<sub>3</sub>) δ 35.3, 36.7 (q, <sup>3</sup>*J*<sub>C,F</sub> = 1.2 Hz, C-6*a*), 40.8, 55.5, 55.5, 74.0 (q, <sup>2</sup>*J*<sub>C,F</sub> = 31.1 Hz, C-6), 85.7, 106.6, 114.1 (2C), 114.3 (2C), 116.8, 123.1,



123.2, 123.4 (q,  $^1J_{C,F} = 287.3$  Hz, CF<sub>3</sub>), 126.0, 128.6, 129.3, 129.5, 130.0 (2C), 130.8 (2C), 149.1, 160.2, 162.1, 186.2, 190.2. HRMS (ESI)  $m/z$ : [M + H]<sup>+</sup> calcd for C<sub>29</sub>H<sub>25</sub>F<sub>3</sub>NO<sub>7</sub> 556.1578, found 556.1572.

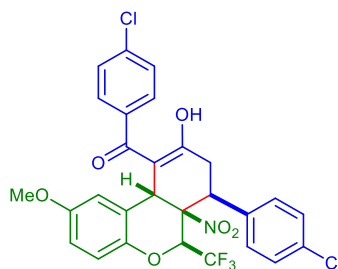

(4-Chlorophenyl)((6*S*\*,6*aR*\*,7*S*\*,10*aR*\*)-7-(4-chlorophenyl)-9-hydroxy-2-methoxy-6*a*-nitro-6-(trifluoromethyl)-6*a*,7,8,10*a*-tetrahydro-6*H*-benzo[*c*]chromen-10-yl)methanone (**5im**). Obtained from **1i** (69 mg) and **3m** (80 mg) according to the general procedure. Yield 136 mg (91%), white powder, mp 187–188 °C. IR (ATR): 1595, 1547, 1492, 1418, 1374, 1271 cm<sup>-1</sup>; <sup>1</sup>H NMR (500 MHz, CDCl<sub>3</sub>) δ 2.71 (dd,  $J = 19.0, 5.5$  Hz, 1H), 2.99 (dd,  $J = 19.0, 13.5$  Hz, 1H), 3.72 (s, 3H), 3.74 (dd,  $J = 13.5, 5.5$  Hz, 1H), 4.83 (q,  $^3J_{H,F} = 7.1$  Hz, 1H), 5.14 (s, 1H), 6.49 (d,  $J = 2.8$  Hz, 1H), 6.80 (dd,  $J = 8.9, 2.8$  Hz, 1H), 6.99 (d,  $J = 8.9$  Hz, 1H), 7.22 (d,  $J = 8.6$  Hz, 2H), 7.40 (d,  $J = 8.6$  Hz, 2H), 7.46 (d,  $J = 8.5$  Hz, 2H), 7.80 (d,  $J = 8.5$  Hz, 2H), 16.24 (s, 1H); <sup>19</sup>F NMR (376 MHz, CDCl<sub>3</sub>) δ 91.08 (d,  $J = 7.1$  Hz, CF<sub>3</sub>); <sup>13</sup>C{<sup>1</sup>H} NMR (126 MHz, CDCl<sub>3</sub>) δ 35.1, 36.8 (q,  $^3J_{C,F} = 1.4$  Hz, C-6*a*), 41.0, 55.8, 73.9 (q,  $^2J_{C,F} = 31.1$  Hz, C-6), 85.6, 106.7, 114.1, 115.2, 117.8, 123.2 (q,  $J = 287.9$  Hz, CF<sub>3</sub>), 123.3, 129.1 (2C), 129.3 (2C), 129.4 (2C), 131.1 (2C), 132.6, 134.5, 135.4, 137.9, 142.5, 155.3, 186.7, 189.4. HRMS (ESI)  $m/z$ : [M + Na]<sup>+</sup> calcd for C<sub>28</sub>H<sub>20</sub>F<sub>3</sub>NNaO<sub>6</sub> 616.0512, found 616.0500.

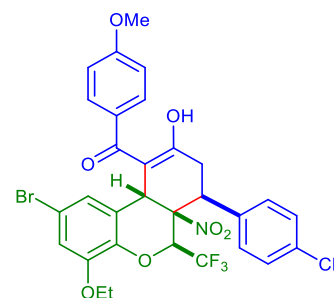

((6*S*\*,6*aR*\*,7*S*\*,10*aR*\*)-2-Bromo-7-(4-chlorophenyl)-4-ethoxy-9-hydroxy-6*a*-nitro-6-(trifluoromethyl)-6*a*,7,8,10*a*-tetrahydro-6*H*-benzo[*c*]chromen-10-yl)(4-methoxyphenyl)methanone (**5fo**). Obtained from **1f** (92 mg) and **3o** (79 mg) according to the general procedure. Yield 157 mg (92%), white powder, mp 214–215 °C. IR (ATR): 1641, 1599, 1556, 1491, 1470, 1423, 1395, 1258 cm<sup>-1</sup>; <sup>1</sup>H NMR (500 MHz, CDCl<sub>3</sub>) δ 1.45 (t,  $J = 7.0$  Hz, 3H), 2.70 (dd,  $J = 18.9, 5.6$  Hz, 1H), 2.97 (dd,  $J = 18.9, 13.3$  Hz, 1H), 3.68 (dd,  $J = 13.3, 5.6$  Hz, 1H), 3.85 (s, 3H), 4.08 (dq,  $J = 10.0, 7.0$  Hz, 1H), 4.10 (dq,  $J = 10.0, 7.0$  Hz, 1H), 4.95 (q,  $^3J_{H,F} = 6.9$  Hz, 1H), 5.24 (s, 1H), 6.74 (d,  $J = 1.9$  Hz, 1H), 6.94

(d,  $J = 1.9$  Hz, 1H), 6.98 (d,  $J = 8.8$  Hz, 2H), 7.21 (d,  $J = 8.5$  Hz, 2H), 7.41 (d,  $J = 8.5$  Hz, 2H), 7.79 (d,  $J = 8.8$  Hz, 2H), 16.44 (s, 1H);  $^{19}\text{F}$  NMR (376 MHz,  $\text{CDCl}_3$ )  $\delta$  91.17 (d,  $J = 6.9$  Hz,  $\text{CF}_3$ );  $^{13}\text{C}\{^1\text{H}\}$  NMR (126 MHz,  $\text{CDCl}_3$ )  $\delta$  14.8, 35.0, 36.6 (q,  $^3J_{\text{C,F}} = 1.1$  Hz, C-6a), 41.2, 55.5, 65.7, 73.9 (q,  $^2J_{\text{C,F}} = 31.3$  Hz, C-6), 85.3, 106.1, 114.4 (2C), 115.2, 116.7, 123.1 (q,  $^1J_{\text{C,F}} = 287.8$  Hz,  $\text{CF}_3$ ), 123.1, 125.5, 128.5, 129.2 (2C), 129.8 (2C), 131.1 (2C), 132.6, 135.4, 138.2, 148.7, 162.3, 185.6, 190.6. HRMS (ESI)  $m/z$ :  $[\text{M} + \text{H}]^+$  calcd for  $\text{C}_{30}\text{H}_{25}\text{BrClF}_3\text{NO}_7$  682.0450, found 682.0437.

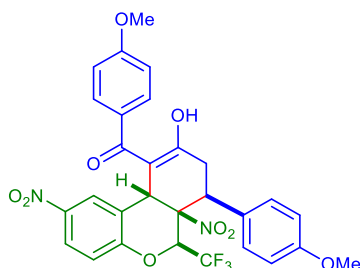

((6*S*\*,6*aR*\*,7*S*\*,10*aR*\*)-9-Hydroxy-7-(4-methoxyphenyl)-2,6*a*-dinitro-6-(trifluoromethyl)-6*a*,7,8,10*a*-tetrahydro-6*H*-benzo[*c*]chromen-10-yl)(4-methoxyphenyl)methanone (**5gp**). Obtained from **1g** (73 mg) and **3p** (78 mg) according to the general procedure. Yield 145 mg (96%), white powder, mp 234–235 °C. IR (ATR): 1601, 1587, 1549, 1496, 1459, 1373, 1258  $\text{cm}^{-1}$ ;  $^1\text{H}$  NMR (500 MHz,  $\text{CDCl}_3$ )  $\delta$  2.72 (dd,  $J = 19.0, 5.3$  Hz, 1H), 3.02 (dd,  $J = 19.0, 13.6$  Hz, 1H), 3.53 (dd,  $J = 13.6, 5.3$  Hz, 1H), 3.83 (s, 3H), 3.86 (s, 3H), 5.03 (q,  $^3J_{\text{H,F}} = 6.9$  Hz, 1H), 5.33 (s, 1H), 6.96 (d,  $J = 8.7$  Hz, 2H), 6.99 (d,  $J = 8.7$  Hz, 2H), 7.16 (d,  $J = 8.7$  Hz, 2H), 7.18 (d,  $J = 8.9$  Hz, 1H), 7.87 (d,  $J = 8.7$  Hz, 2H), 8.05 (d,  $J = 2.4$  Hz, 1H), 8.12 (dd,  $J = 8.9, 2.4$  Hz, 1H), 16.52 (s, 1H);  $^{19}\text{F}$  NMR (376 MHz,  $\text{CDCl}_3$ )  $\delta$  91.08 (d,  $J = 6.9$  Hz,  $\text{CF}_3$ );  $^{13}\text{C}\{^1\text{H}\}$  NMR (126 MHz,  $\text{CDCl}_3$ )  $\delta$  35.1, 36.5 (br. s, C-6a), 41.0, 55.50, 55.54, 74.5 (q,  $^2J_{\text{C,F}} = 31.2$  Hz, C-6), 84.9, 105.6, 114.4 (2C), 114.5 (2C), 117.7, 123.0 (q,  $^1J_{\text{C,F}} = 287.5$  Hz,  $\text{CF}_3$ ), 124.4, 125.1, 125.2, 125.7, 128.4, 129.8 (2C), 130.8 (2C), 143.5, 153.8, 160.5, 162.2, 186.1, 191.3. HRMS (ESI)  $m/z$ :  $[\text{M} + \text{H}]^+$  calcd for  $\text{C}_{29}\text{H}_{23}\text{F}_3\text{N}_2\text{NaO}_9$  623.1248, found 623.1242.

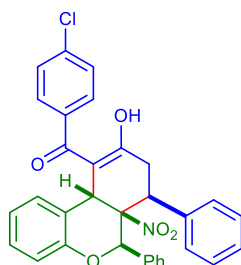

(4-Chlorophenyl)((6*S*\*,6*aR*\*,7*S*\*,10*aR*\*)-9-hydroxy-6*a*-nitro-6,7-diphenyl-6*a*,7,8,10*a*-tetrahydro-6*H*-benzo[*c*]chromen-10-yl)methanone (**5kb**). Obtained from **1k** (64 mg) and **3b** (71 mg) according to the general procedure. Yield 125 mg (93%), white powder, mp 208–209 °C. IR (ATR): 1591, 1580, 1538, 1482, 1449, 1398, 1276, 1225  $\text{cm}^{-1}$ ;  $^1\text{H}$  NMR (500 MHz,  $\text{CDCl}_3$ )  $\delta$  2.74 (dd,  $J = 19.1, 5.4$  Hz,

1H), 3.11 (dd,  $J = 19.1, 13.5$  Hz, 1H), 3.73 (dd,  $J = 13.5, 5.4$  Hz, 1H), 4.97 (s, 1H), 5.45 (s, 1H), 6.83 (d,  $J = 7.6$  Hz, 2H), 6.96–7.01 (m, 2H), 7.09 (d,  $J = 8.3$  Hz, 1H), 7.17 (t,  $J = 7.6$  Hz, 2H), 7.24–7.34 (m, 4H), 7.39–7.47 (m, 5H), 7.59 (d,  $J = 8.4$  Hz, 2H), 16.33 (s, 1H);  $^{13}\text{C}\{^1\text{H}\}$  NMR (126 MHz,  $\text{CDCl}_3$ )  $\delta$  35.5, 35.7, 41.3, 78.1, 91.1, 106.6, 116.7, 121.8, 123.1, 126.8 (2C), 128.5 (2C), 128.6, 128.7 (2C), 128.8, 128.9 (2C), 129.3 (2C), 129.6, 129.7, 130.2 (2C), 134.8, 135.2, 135.8, 137.3, 151.1, 187.5, 190.3. HRMS (ESI)  $m/z$ :  $[\text{M} + \text{Na}]^+$  calcd for  $\text{C}_{32}\text{H}_{24}\text{ClNNaO}_5$  560.1235, found 560.1229.

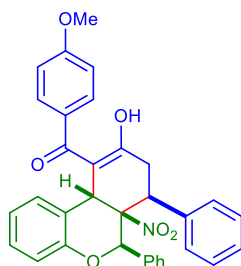

*((6S\*,6aR\*,7S\*,10aR\*)-9-Hydroxy-6a-nitro-6,7-diphenyl-6a,7,8,10a-tetrahydro-6H-benzo[c]chromen-10-yl)(4-methoxyphenyl)methanone (5kc)*. Obtained from **1k** (64 mg) and **3c** (70 mg) according to the general procedure. Yield 120 mg (90%), white powder, mp 192–193 °C. IR (ATR): 1603, 1580 1559, 1482, 1449, 1416, 1282, 1227  $\text{cm}^{-1}$ ;  $^1\text{H}$  NMR (500 MHz,  $\text{CDCl}_3$ )  $\delta$  2.72 (dd,  $J = 19.0, 5.5$  Hz, 1H), 3.10 (dd,  $J = 19.0, 13.5$  Hz, 1H), 3.73 (dd,  $J = 13.5, 5.5$  Hz, 1H), 3.82 (s, 3H), 5.13 (s, 1H), 5.45 (s, 1H), 6.79 (d,  $J = 8.8$  Hz, 2H), 6.87 (d,  $J = 7.6$  Hz, 2H), 6.96 (td,  $J = 7.9, 0.9$  Hz, 1H), 7.04 (d,  $J = 7.9$  Hz, 1H), 7.07 (dd,  $J = 8.1, 0.9$  Hz, 1H), 7.17 (t,  $J = 7.8$  Hz, 2H), 7.27–7.32 (m, 2H), 7.39–7.47 (m, 5H), 7.64 (d,  $J = 8.8$  Hz, 2H), 16.58 (s, 1H);  $^{13}\text{C}\{^1\text{H}\}$  NMR (126 MHz,  $\text{CDCl}_3$ )  $\delta$  35.5, 35.7, 41.4, 55.5, 78.2, 91.2, 106.4, 113.9 (2C), 116.6, 121.8, 123.5, 127.0 (2C), 128.4 (2C), 128.5, 128.7 (2C), 129.0, 129.2, 129.4 (2C), 129.9 (2C), 130.2 (2C), 135.5, 136.0, 151.1, 161.9, 186.5, 191.2. HRMS (ESI)  $m/z$ :  $[\text{M} + \text{H}]^+$  calcd for  $\text{C}_{33}\text{H}_{28}\text{NO}_6$  534.1911, found 534.1903.

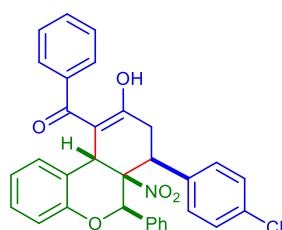

*((6S\*,6aR\*,7S\*,10aR\*)-7-(4-Chlorophenyl)-9-hydroxy-6a-nitro-6-phenyl-6a,7,8,10a-tetrahydro-6H-benzo[c]chromen-10-yl)(phenyl)methanone (5ke)*. Obtained from **1k** (64 mg) and **3e** (71 mg) according to the general procedure. Yield 131 mg (98%), white powder, mp 206–207 °C. IR (ATR): 1601, 1581, 1547, 1483, 1451, 1410, 1278, 1223  $\text{cm}^{-1}$ ;  $^1\text{H}$  NMR (500 MHz,  $\text{CDCl}_3$ )  $\delta$  2.72 (dd,  $J = 19.0, 5.4$  Hz, 1H), 3.05 (dd,  $J = 19.0, 13.5$  Hz, 1H), 3.71 (dd,  $J = 13.5, 5.4$  Hz, 1H), 5.07 (s, 1H), 5.39 (s, 1H), 6.83 (d,  $J = 7.6$  Hz, 2H), 6.97 (t,  $J = 7.5$  Hz, 1H), 7.02–7.08 (m, 2H), 7.15 (t,  $J = 7.6$  Hz, 2H), 7.27–7.33

(m, 4H), 7.34–7.44 (m, 5H), 7.63 (d,  $J = 7.6$  Hz, 2H), 16.43 (s, 1H);  $^{13}\text{C}\{^1\text{H}\}$  NMR (126 MHz,  $\text{CDCl}_3$ )  $\delta$  35.5, 35.6, 40.9, 78.2, 91.0, 106.5, 116.6, 121.9, 123.2, 126.8 (2C), 127.8 (2C), 128.6 (2C), 128.7 (2C), 128.8 (2C), 129.1, 129.5, 129.6, 131.1, 131.6 (2C), 133.9, 134.6, 135.7, 136.3, 151.0, 186.9, 191.7. HRMS (ESI)  $m/z$ :  $[\text{M} + \text{H}]^+$  calcd for  $\text{C}_{32}\text{H}_{25}\text{ClNO}_5$  539.1416, found 538.1415.

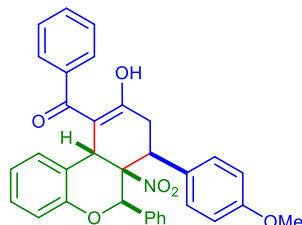

((6*S*\*,6*aR*\*,7*S*\*,10*aR*\*)-9-Hydroxy-7-(4-methoxyphenyl)-6*a*-nitro-6-phenyl-6*a*,7,8,10*a*-tetrahydro-6*H*-benzo[*c*]chromen-10-yl)(phenyl)methanone (**5kh**). Obtained from **1k** (64 mg) and **3h** (70 mg) according to the general procedure. Yield 100 mg (75%), white powder, mp 185–186 °C. IR (ATR): 1612, 1603, 1580, 1549, 1484, 1451, 1278, 1226  $\text{cm}^{-1}$ ;  $^1\text{H}$  NMR (500 MHz,  $\text{CDCl}_3$ )  $\delta$  2.71 (dd,  $J = 19.2$ , 5.3 Hz, 1H), 3.05 (dd,  $J = 19.2$ , 13.6 Hz, 1H), 3.69 (dd,  $J = 13.6$ , 5.3 Hz, 1H), 3.87 (s, 3H), 5.05 (s, 1H), 5.44 (s, 1H), 6.83 (d,  $J = 7.7$  Hz, 2H), 6.93–6.70 (m, 3H), 7.02–7.07 (m, 2H), 7.13 (t,  $J = 7.6$  Hz, 2H), 7.23–7.31 (m, 4H), 7.33 (d,  $J = 8.6$  Hz, 2H), 7.40 (t,  $J = 7.4$  Hz, 1H), 7.64 (d,  $J = 7.6$  Hz, 2H), 16.44 (s, 1H);  $^{13}\text{C}\{^1\text{H}\}$  NMR (126 MHz,  $\text{CDCl}_3$ )  $\delta$  35.6, 35.9, 40.8, 55.4, 78.2, 91.2, 106.6, 113.8 (2C), 116.5, 121.7, 123.4, 126.9 (2C), 127.2, 127.8 (2C), 128.5 (2C), 128.7 (2C), 129.1, 129.4, 129.4, 131.0, 131.2 (2C), 136.0, 136.4, 151.1, 159.7, 187.5, 191.5. HRMS (ESI)  $m/z$ :  $[\text{M} + \text{H}]^+$  calcd for  $\text{C}_{33}\text{H}_{28}\text{NO}_6$  534.1911, found 534.1912.

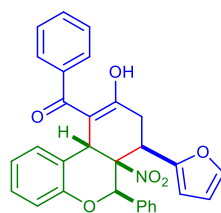

((6*R*\*,6*aS*\*,7*S*\*,10*aR*\*)-7-(Furan-2-yl)-9-hydroxy-6*a*-nitro-6-phenyl-6*a*,7,8,10*a*-tetrahydro-6*H*-benzo[*c*]chromen-10-yl)(phenyl)methanone (**5kl**). Obtained from **1k** (64 mg) and **3l** (60 mg) according to the general procedure. Yield 100 mg (81%), white powder, mp 183–184 °C. IR (ATR): 1603, 1580, 1545, 1483, 1451, 1361, 1278, 1226  $\text{cm}^{-1}$ ;  $^1\text{H}$  NMR (500 MHz,  $\text{CDCl}_3$ )  $\delta$  2.83 (dd,  $J = 19.5$ , 5.9 Hz, 1H), 3.07 (dd,  $J = 19.5$ , 13.2 Hz, 1H), 3.86 (dd,  $J = 13.2$ , 5.9 Hz, 1H), 5.02 (s, 1H), 5.82 (s, 1H), 6.46 (d,  $J = 2.5$  Hz, 1H), 6.49 (d,  $J = 2.5$  Hz, 1H), 6.87 (d,  $J = 7.6$  Hz, 2H), 6.94 (t,  $J = 7.6$  Hz, 1H), 6.98–7.05 (m, 2H), 7.16 (t,  $J = 7.6$  Hz, 2H), 7.21–7.34 (m, 4H), 7.40 (t,  $J = 7.4$  Hz, 1H), 7.54 (s, 1H), 7.61 (d,  $J = 7.6$  Hz, 2H), 16.48 (s, 1H);  $^{13}\text{C}\{^1\text{H}\}$  NMR (126 MHz,  $\text{CDCl}_3$ )  $\delta$  33.6, 35.3, 36.0, 78.6, 90.3, 106.2, 110.1, 110.9, 116.7, 121.8, 123.1, 126.8 (2C), 127.7 (2C), 128.5 (2C), 128.7 (2C), 128.9, 129.4 (2C),

131.1, 135.8, 136.3, 143.0, 149.9, 151.4, 186.5, 191.9. HRMS (ESI)  $m/z$ :  $[M + H]^+$  calcd for  $C_{30}H_{24}NO_6$  494.1598, found 494.1601.

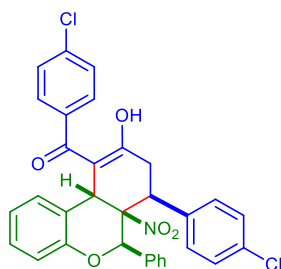

(4-Chlorophenyl)((6*S*\*,6*aR*\*,7*S*\*,10*aR*\*)-7-(4-chlorophenyl)-9-hydroxy-6*a*-nitro-6-phenyl-6*a*,7,8,10*a*-tetrahydro-6*H*-benzo[*c*]chromen-10-yl)methanone (**5km**). Obtained from **1k** (64 mg) and **3m** (80 mg) according to the general procedure. Yield 123 mg (86%), white powder, mp 203–204 °C. IR (ATR): 1581, 1544, 1483, 1450, 1399, 1277, 1222  $cm^{-1}$ ;  $^1H$  NMR (500 MHz,  $CDCl_3$ )  $\delta$  2.72 (dd,  $J = 19.1, 5.5$  Hz, 1H), 3.05 (dd,  $J = 19.1, 13.6$  Hz, 1H), 3.71 (dd,  $J = 13.6, 5.5$  Hz, 1H), 4.97 (s, 1H), 5.39 (s, 1H), 6.83 (d,  $J = 7.7$  Hz, 2H), 6.96–7.00 (m, 2H), 7.08 (d,  $J = 8.1$  Hz, 1H), 7.18 (t,  $J = 7.7$  Hz, 2H), 7.25–7.34 (m, 4H), 7.36 (d,  $J = 8.6$  Hz, 2H), 7.42 (d,  $J = 8.6$  Hz, 2H), 7.58 (d,  $J = 8.6$  Hz, 2H), 16.31 (s, 1H);  $^{13}C\{^1H\}$  NMR (126 MHz,  $CDCl_3$ )  $\delta$  35.5, 35.6, 40.8, 78.2, 91.0, 106.4, 116.7, 122.0, 123.0, 126.8 (2C), 128.7 (2C), 128.8 (3C), 128.9 (2C), 129.3 (2C), 129.7, 129.8, 131.5 (2C), 133.8, 134.6, 134.7, 135.6, 137.4, 151.0, 187.0, 190.4. HRMS (ESI)  $m/z$ :  $[M + Na]^+$  calcd for  $C_{32}H_{23}Cl_2NNaO_5$  594.0845, found 594.0843.

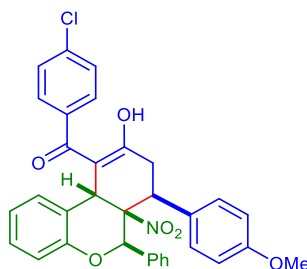

(4-Chlorophenyl)((6*R*\*,6*aR*\*,7*S*\*,10*aR*\*)-9-hydroxy-7-(4-methoxyphenyl)-6*a*-nitro-6-phenyl-6*a*,7,8,10*a*-tetrahydro-6*H*-benzo[*c*]chromen-10-yl)methanone (**5kn**). Obtained from **1k** (64 mg) and **3n** (79 mg) according to the general procedure. Yield 131 mg (92%), white powder, mp 179–180 °C. IR (ATR): 1593, 1578, 1544, 1482, 1450, 1396, 1278, 1222  $cm^{-1}$ ;  $^1H$  NMR (500 MHz,  $CDCl_3$ )  $\delta$  2.72 (dd,  $J = 19.2, 5.5$  Hz, 1H), 3.05 (dd,  $J = 19.2, 13.6$  Hz, 1H), 3.68 (dd,  $J = 13.6, 5.5$  Hz, 1H), 3.87 (s, 3H), 4.96 (s, 1H), 5.44 (s, 1H), 6.84 (d,  $J = 7.7$  Hz, 2H), 6.93–7.02 (m, 4H), 7.07 (d,  $J = 8.1$  Hz, 1H), 7.17 (t,  $J = 7.7$  Hz, 2H), 7.24–7.36 (m, 6H), 7.59 (d,  $J = 8.4$  Hz, 2H), 16.33 (s, 1H);  $^{13}C\{^1H\}$  NMR (126 MHz,  $CDCl_3$ )  $\delta$  35.6, 35.8, 40.7, 55.4, 78.2, 91.2, 106.6, 113.8 (2C), 116.7, 121.8, 123.1, 126.8 (2C), 127.1, 128.7 (2C), 128.8, 128.9 (2C), 129.3 (2C), 129.5, 129.6, 131.2 (2C), 134.8, 135.9, 137.3, 151.1, 159.8,

187.6, 190.2. HRMS (ESI)  $m/z$ :  $[M + H]^+$  calcd for  $C_{33}H_{27}ClNO_6$  568.1521, found 568.1510.

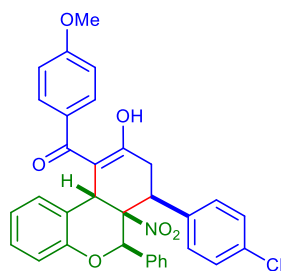

((6*R*\*,6*aR*\*,7*S*\*,10*aR*\*)-7-(4-Chlorophenyl)-9-hydroxy-6*a*-nitro-6-phenyl-6*a*,7,8,10*a*-tetrahydro-6*H*-benzo[*c*]chromen-10-yl)(4-methoxyphenyl)methanone (**5ko**). Obtained from **1k** (64 mg) and **3o** (79 mg) according to the general procedure. Yield 133 mg (94%), white powder, mp 173–174 °C. IR (ATR): 1602, 1581, 1547, 1483, 1450, 1304, 1278, 1222  $cm^{-1}$ ;  $^1H$  NMR (500 MHz,  $CDCl_3$ )  $\delta$  2.70 (dd,  $J = 18.9, 5.4$  Hz, 1H), 3.04 (dd,  $J = 18.9, 13.5$  Hz, 1H), 3.71 (dd,  $J = 13.5, 5.4$  Hz, 1H), 3.82 (s, 3H), 5.13 (s, 1H), 5.40 (s, 1H), 6.79 (d,  $J = 8.6$  Hz, 2H), 6.87 (d,  $J = 7.6$  Hz, 2H), 6.97 (t,  $J = 7.6$  Hz, 1H), 7.03 (d,  $J = 7.6$  Hz, 1H), 7.07 (d,  $J = 8.1$  Hz, 1H), 7.18 (t,  $J = 7.6$  Hz, 2H), 7.27–7.34 (m, 2H), 7.37 (d,  $J = 8.4$  Hz, 2H), 7.42 (d,  $J = 8.4$  Hz, 2H), 7.63 (d,  $J = 8.6$  Hz, 2H), 16.56 (s, 1H);  $^{13}C\{^1H\}$  NMR (126 MHz,  $CDCl_3$ )  $\delta$  35.4, 35.6, 40.8, 55.5, 78.2, 91.1, 106.2, 113.9 (2C), 116.6, 121.9, 123.4, 126.9 (2C), 128.6 (2C), 128.8 (2C), 128.9, 129.2, 129.5, 129.6, 129.9 (2C), 131.6 (2C), 134.0, 134.5, 135.7, 151.0, 161.9, 186.0, 191.3. HRMS (ESI)  $m/z$ :  $[M + H]^+$  calcd for  $C_{33}H_{27}ClNO_6$  568.1521, found 568.1521.

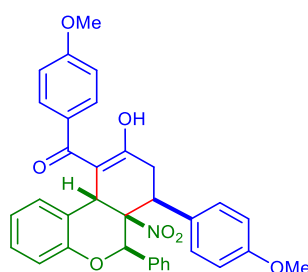

((6*R*\*,6*aR*\*,7*S*\*,10*aR*\*)-9-Hydroxy-7-(4-methoxyphenyl)-6*a*-nitro-6-phenyl-6*a*,7,8,10*a*-tetrahydro-6*H*-benzo[*c*]chromen-10-yl)(4-methoxyphenyl)methanone (**5kp**). Obtained from **1k** (64 mg) and **3p** (78 mg) according to the general procedure. Yield 121 mg (86%), beige powder, mp 181–192 °C. IR (ATR): 1601, 1582, 1540, 1482, 1450, 1302, 1278, 1219  $cm^{-1}$ ;  $^1H$  NMR (500 MHz,  $CDCl_3$ )  $\delta$  2.69 (dd,  $J = 19.0, 5.4$  Hz, 1H), 3.04 (dd,  $J = 19.0, 13.6$  Hz, 1H), 3.69 (dd,  $J = 13.6, 5.4$  Hz, 1H), 3.81 (s, 3H), 3.86 (s, 3H), 5.11 (s, 1H), 5.45 (s, 1H), 6.78 (d,  $J = 8.7$  Hz, 2H), 6.87 (d,  $J = 7.7$  Hz, 2H), 6.93–6.99 (m, 3H), 7.03 (d,  $J = 7.8$  Hz, 1H), 7.06 (dd,  $J = 8.2, 0.9$  Hz, 1H), 7.16 (t,  $J = 7.7$  Hz, 2H), 7.24–7.32 (m, 2H), 7.34 (d,  $J = 8.6$  Hz, 2H), 7.64 (d,  $J = 8.7$  Hz, 2H), 16.58 (s, 1H);  $^{13}C\{^1H\}$  NMR (126 MHz,  $CDCl_3$ )  $\delta$  35.6, 35.7, 40.7, 55.4, 55.5, 78.2, 91.3, 106.4, 113.8 (2C), 113.9 (2C), 116.5, 121.7, 123.6, 127.0 (2C), 127.3, 128.7 (2C), 129.0, 129.2, 129.4, 129.4, 129.9 (2C), 131.3 (2C), 136.1, 151.1, 159.7, 161.9, 186.6, 191.2.

HRMS (ESI)  $m/z$ :  $[M + H]^+$  calcd for  $C_{34}H_{30}O_7$  564.2017, found 564.2009.

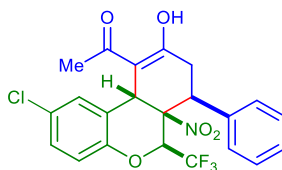

*1-((6S\*,6aR\*,7S\*,10aR\*)-2-Chloro-9-hydroxy-6a-nitro-7-phenyl-6-(trifluoromethyl)-6a,7,8,10a-tetrahydro-6H-benzo[c]chromen-10-yl)ethan-1-one (5bq)*. Obtained from **1b** (70 mg) and **3q** (47 mg) according to the general procedure purified by column chromatography,  $CH_2Cl_2$ -hexane (2:1). Yield 113 mg (96%), yellowish powder, mp 112–113 °C. IR (ATR): 1604, 1577, 1554, 1475, 1454, 1371, 1271, 1179  $cm^{-1}$ ;  $^1H$  NMR (500 MHz,  $CDCl_3$ )  $\delta$  2.48 (s, 3H), 2.66 (dd,  $J = 19.2, 5.6$  Hz, 1H), 2.93 (dd,  $J = 19.2, 13.3$  Hz, 1H), 3.61 (dd,  $J = 13.3, 5.6$  Hz, 1H), 4.73 (s, 1H), 4.89 (q,  $J = 7.1$  Hz, 1H), 6.98 (dd,  $J = 2.1, 0.8$  Hz, 1H), 7.11 (d,  $J = 8.7$  Hz, 1H), 7.23–7.26 (m, 2H), 7.30 (dd,  $J = 8.7, 2.1$  Hz, 1H), 7.40–7.44 (m, 3H), 16.19 (s, 1H);  $^{19}F$  NMR (376 MHz,  $CDCl_3$ )  $\delta$  90.85 (d,  $J = 7.1$  Hz,  $CF_3$ );  $^{13}C\{^1H\}$  NMR (151 MHz,  $CDCl_3$ )  $\delta$  24.1, 34.2, 36.8, 41.7, 73.9 (q,  $J = 31.1$  Hz), 85.0, 106.7, 118.6, 123.2 (q,  $J = 287.4$  Hz), 124.2, 128.55, 128.64, 128.8 (2C), 129.4, 129.86 (2C), 129.93, 133.8, 147.9, 183.0, 195.5. HRMS (ESI)  $m/z$ :  $[M + H]^+$  calcd for  $C_{22}H_{18}ClF_3NO_5$  468.0826, found 468.0827.

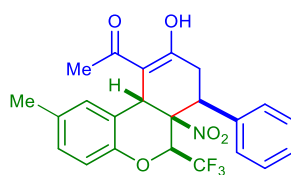

*1-((6S\*,6aR\*,7S\*,10aR\*)-9-Hydroxy-2-methyl-6a-nitro-7-phenyl-6-(trifluoromethyl)-6a,7,8,10a-tetrahydro-6H-benzo[c]chromen-10-yl)ethan-1-one (5hq)*. Obtained from **1h** (65 mg) and **3q** (47 mg) according to the general procedure purified by column chromatography,  $CH_2Cl_2$ -hexane (2:1). Yield 105 mg (93%), white powder, mp 163–164 °C. IR (ATR): 1616, 1591, 1553, 1493, 1419, 1372, 1269, 1181  $cm^{-1}$ ;  $^1H$  NMR (500 MHz,  $CDCl_3$ )  $\delta$  2.32 (s, 3H), 2.49 (s, 3H), 2.62 (dd,  $J = 19.2, 5.6$  Hz, 1H), 2.92 (dd,  $J = 19.2, 13.3$  Hz, 1H), 3.67 (dd,  $J = 13.3, 5.6$  Hz, 1H), 4.73 (s, 1H), 4.86 (q,  $J = 7.2$  Hz, 1H), 6.78 (s, 1H), 7.04 (d,  $J = 8.2$  Hz, 1H), 7.13 (d,  $J = 8.2$  Hz, 1H), 7.26–7.30 (m, 2H), 7.37–7.44 (m, 3H), 16.13 (s, 1H);  $^{19}F$  NMR (376 MHz,  $CDCl_3$ )  $\delta$  90.83 (d,  $J = 7.2$  Hz,  $CF_3$ );  $^{13}C\{^1H\}$  NMR (151 MHz,  $CDCl_3$ )  $\delta$  21.0, 24.3, 34.1, 36.8, 41.6, 73.8 (q,  $J = 30.8$  Hz), 85.5, 107.4, 117.0, 122.0, 123.4 (q,  $J = 287.6$  Hz), 128.7 (2C), 128.9, 129.2, 129.9 (2C), 132.4, 132.8, 134.2, 147.0, 182.3, 196.1. HRMS (ESI)  $m/z$ :  $[M + H]^+$  calcd for  $C_{23}H_{21}F_3NO_5$  448.1372, found 448.1378.

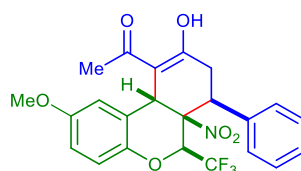

*1-((6S\*,6aR\*,7S\*,10aR\*)-9-Hydroxy-2-methoxy-6a-nitro-7-phenyl-6-(trifluoromethyl)-6a,7,8,10a-tetrahydro-6H-benzo[c]chromen-10-yl)ethan-1-one (5iq)*. Obtained from **1i** (69 mg) and **3q** (47 mg) according to the general procedure purified by column chromatography, CH<sub>2</sub>Cl<sub>2</sub>-hexane (2:1). Yield 96 mg (83%), white powder, mp 97–98 °C. IR (ATR): 1614, 1552, 1493, 1420, 1373, 1273, 1177 cm<sup>-1</sup>; <sup>1</sup>H NMR (500 MHz, CDCl<sub>3</sub>) δ 2.48 (s, 3H), 2.63 (dd, *J* = 19.2, 5.6 Hz, 1H), 2.92 (dd, *J* = 19.2, 13.3 Hz, 1H), 3.68 (dd, *J* = 13.3, 5.5 Hz, 1H), 3.78 (s, 3H), 4.74 (s, 1H), 4.85 (q, *J* = 7.2 Hz, 1H), 6.54 (d, *J* = 2.7 Hz, 1H), 6.88 (dd, *J* = 8.9, 2.7 Hz, 1H), 7.09 (d, *J* = 8.9 Hz, 1H), 7.27–7.30 (m, 2H), 7.39–7.43 (m, 3H), 16.16 (s, 1H); <sup>19</sup>F NMR (376 MHz, CDCl<sub>3</sub>) δ 91.88 (d, *J* = 7.2 Hz, CF<sub>3</sub>); <sup>13</sup>C{<sup>1</sup>H} NMR (126 MHz, CDCl<sub>3</sub>) δ 24.1, 34.2, 37.0, 41.7, 55.9, 73.8 (q, *J* = 30.8 Hz), 85.6, 107.3, 114.3, 114.7, 117.9, 123.3, 123.4 (q, *J* = 287.7 Hz), 128.7 (2C), 129.2, 129.9 (2C), 134.2, 143.0, 155.4, 182.8, 195.6. HRMS (ESI) *m/z*: [M + H]<sup>+</sup> calcd for C<sub>23</sub>H<sub>21</sub>F<sub>3</sub>NO<sub>6</sub> 464.1321, found 464.1332.

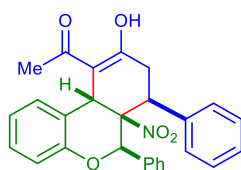

*1-((6R\*,6aR\*,7S\*,10aR\*)-9-Hydroxy-6a-nitro-6,7-diphenyl-6a,7,8,10a-tetrahydro-6H-benzo[c]chromen-10-yl)ethan-1-one (5kq)*. Obtained from **1k** (63 mg) and **3q** (47 mg) according to the general procedure purified by column chromatography, CH<sub>2</sub>Cl<sub>2</sub>-hexane (2:1). Yield 100 mg (91%), yellowish powder, mp 188–189 °C. IR (ATR): 1604, 1581, 1544, 1484, 1451, 1355, 1278, 1188 cm<sup>-1</sup>; <sup>1</sup>H NMR (500 MHz, CDCl<sub>3</sub>) δ 2.31 (s, 3H), 2.64 (dd, *J* = 19.2, 5.5 Hz, 1H), 3.01 (dd, *J* = 19.2, 13.4 Hz, 1H), 3.67 (dd, *J* = 13.4, 5.5 Hz, 1H), 4.57 (s, 1H), 5.45 (s, 1H), 6.98 (d, *J* = 7.6 Hz, 2H), 7.05 (d, *J* = 7.5 Hz, 1H), 7.09 (t, *J* = 7.5 Hz, 1H), 7.18 (d, *J* = 8.1 Hz, 1H), 7.22 (t, *J* = 7.6 Hz, 2H), 7.30 (t, *J* = 7.5 Hz, 1H), 7.35–7.46 (m, 6H), 16.12 (s, 1H); <sup>13</sup>C{<sup>1</sup>H} NMR (126 MHz, CDCl<sub>3</sub>) δ 24.3, 34.5, 35.9, 41.6, 78.1, 91.2, 107.3, 116.9, 122.1, 123.0, 126.7 (2C), 128.4 (2C), 128.6, 128.7, 128.8 (2C), 129.5, 129.7, 130.4 (2C), 135.4, 136.0, 151.5, 182.5, 197.1. Anal. Calcd for C<sub>27</sub>H<sub>23</sub>NO<sub>5</sub>·0.66H<sub>2</sub>O: C, 71.51; H, 5.41; N, 3.09. Found: C, 71.54; H, 5.01; N, 3.08. HRMS (ESI) *m/z*: [M + H]<sup>+</sup> calcd for C<sub>27</sub>H<sub>24</sub>NO<sub>5</sub> 442.1654, found 442.1651.



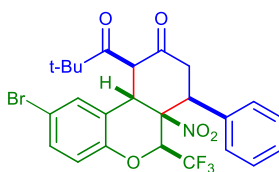

(6*S*\*,6*aR*\*,7*S*\*,10*R*\*,10*aS*\*)-2-Bromo-6*a*-nitro-7-phenyl-10-pivaloyl-6-(trifluoromethyl)-6,6*a*,7,8,10,10*a*-hexahydro-9*H*-benzo[*c*]chromen-9-one (**5dr**). Obtained from **1d** (81 mg) and **3r** (58 mg) according to the general procedure, purified by column chromatography, CH<sub>2</sub>Cl<sub>2</sub>-hexane (2:1). Yield 125 mg (90%), white powder, mp 172–173 °C. IR (ATR): 1729, 1690, 1556, 1479, 1457, 1368, 1265, 1169, 1152 cm<sup>-1</sup>; <sup>1</sup>H NMR (500 MHz, CDCl<sub>3</sub>) δ 1.22 (s, 9H), 2.81 (dd, *J* = 18.3, 9.7 Hz, 1H), 2.89 (dd, *J* = 18.3, 7.0 Hz, 1H), 4.12 (dd, *J* = 9.7, 7.0 Hz, 1H), 4.29 (d, *J* = 8.7 Hz, 1H), 4.95 (q, *J* = 6.8 Hz, 1H), 5.04 (d, *J* = 8.7 Hz, 1H), 6.96 (d, *J* = 8.7 Hz, 1H), 7.02 (d, *J* = 2.3 Hz, 1H), 7.23–7.26 (m, 2H), 7.35 (dd, *J* = 8.7, 2.3 Hz, 1H), 7.41–7.44 (m, 3H); <sup>19</sup>F NMR (376 MHz, CDCl<sub>3</sub>) δ 95.89 (d, *J* = 6.8 Hz, CF<sub>3</sub>); <sup>13</sup>C{<sup>1</sup>H} NMR (151 MHz, CDCl<sub>3</sub>) δ 26.9 (3C), 37.9, 41.6, 45.1, 45.7, 61.9, 74.5 (q, *J* = 32.3 Hz), 87.6, 116.3, 119.4, 123.1 (q, *J* = 287.1 Hz), 125.4, 129.2 (2C), 129.69, 129.72 (2C), 131.4, 132.5, 133.7, 148.8, 201.9, 211.6. HRMS (ESI) *m/z*: [M + Na]<sup>+</sup> calcd for C<sub>25</sub>H<sub>23</sub>BrF<sub>3</sub>NNaO<sub>5</sub> 576.0604, found 576.0630.

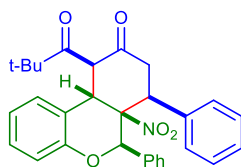

(6*S*\*,6*aR*\*,7*S*\*,10*R*\*,10*aS*\*)-6*a*-Nitro-6,7-diphenyl-10-pivaloyl-6,6*a*,7,8,10,10*a*-hexahydro-9*H*-benzo[*c*]chromen-9-one (**5kr**). Obtained from **1k** (63 mg) and **3r** (58 mg) in CH<sub>2</sub>Cl<sub>2</sub> at 35 °C within 16 h. Purified by washing with hexane. Yield 108 mg (89%), white powder, mp 163–164 °C. IR (ATR): 1730, 1698, 1592, 1541, 1492, 1454, 1366, 1258, 1240, 1159 cm<sup>-1</sup>; <sup>1</sup>H NMR (500 MHz, CDCl<sub>3</sub>) δ 1.04 (s, 9H), 2.88 (dd, *J* = 16.1, 4.0 Hz, 1H), 3.25 (dd, *J* = 16.1, 7.0 Hz, 1H), 3.88 (dd, *J* = 7.0, 4.0 Hz, 1H), 4.54 (d, *J* = 11.1 Hz, 1H), 5.09 (d, *J* = 11.1 Hz, 1H), 5.94 (s, 1H), 6.86–6.91 (m, 2H), 6.94 (dd, *J* = 7.8, 1.4 Hz, 1H), 7.03–7.07 (m, 2H), 7.15 (ddd, *J* = 8.4, 7.1, 1.6 Hz, 1H), 7.25–7.31 (m, 3H), 7.45–7.53 (m, 5H); <sup>13</sup>C{<sup>1</sup>H} NMR (151 MHz, CDCl<sub>3</sub>) δ 26.1 (3C), 39.9, 44.0, 45.8, 46.6, 62.7, 77.7, 90.9, 117.3, 122.2, 122.4, 128.38 (2C), 128.42 (2C), 128.7, 129.06 (2C), 129.12, 129.4 (2C), 129.8, 129.9, 134.8, 136.7, 152.1, 203.9, 211.4. Anal. Calcd for C<sub>30</sub>H<sub>29</sub>NO<sub>5</sub>: C, 74.52; H, 6.05; N, 2.90. Found: C, 74.73; H, 6.20; N, 2.84.

#### General procedure for the synthesis of 10-cinnamoylhexahydro-9*H*-benzo[*c*]chromen-9-ones **6**.

A mixture of the appropriate 2*H*-nitrochromene **1** (0.25 mmol), curcuminoid **4** (0.25 mmol) and Cs<sub>2</sub>CO<sub>3</sub> (20 mg, 0.06 mmol) was dissolved in dichloromethane (3 mL) and stirred at room temperature (TLC control, CH<sub>2</sub>Cl<sub>2</sub>-hexane (1:1)) for time period specified in table 2. Upon completion of the reaction,

formed orange solution was quenched with hexane (4 ml), precipitate was filtered off and the residue was evaporated under reduced pressure to complete dryness. Residue was purified as indicated below to give target products **6**.

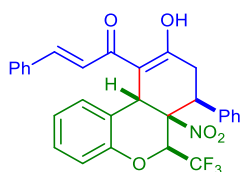

(*E*)-1-((6*S*\*,6*aR*\*,7*S*\*,10*aR*\*)-9-Hydroxy-6*a*-nitro-7-phenyl-6-(trifluoromethyl)-6*a*,7,8,10*a*-tetrahydro-6*H*-benzo[*c*]chromen-10-yl)-3-phenylprop-2-en-1-one (**6a**). Obtained from **1a** (61 mg) and **4a** (69 mg) according to the general procedure and recrystallized from MeOH. Yield 115 mg (97%), light-yellow powder, mp 210–211 °C. IR (ATR): 1625, 1584, 1549, 1487, 1454, 1371, 1280, 1271 cm<sup>-1</sup>; <sup>1</sup>H NMR (500 MHz, CDCl<sub>3</sub>) δ 2.70 (dd, *J* = 19.1, 5.5 Hz, 1H), 2.97 (dd, *J* = 19.1, 13.6 Hz, 1H), 3.74 (dd, *J* = 13.6, 5.5 Hz, 1H), 4.95 (q, <sup>3</sup>*J*<sub>H,F</sub> = 7.1 Hz, 1H), 4.97 (s, 1H), 6.99 (d, *J* = 15.3 Hz, 1H), 7.06 (t, *J* = 7.3 Hz, 1H), 7.18 (d, *J* = 7.9 Hz, 2H), 7.27–7.31 (m, 2H), 7.34 (t, *J* = 7.6 Hz, 1H), 7.38–7.45 (m, 6H), 7.53–7.59 (m, 2H), 8.05 (d, *J* = 15.3 Hz, 1H), 16.94 (s, 1H); <sup>19</sup>F NMR (376 MHz, CDCl<sub>3</sub>) δ 91.27 (d, *J* = 7.1 Hz, CF<sub>3</sub>); <sup>13</sup>C{<sup>1</sup>H} NMR (126 MHz, CDCl<sub>3</sub>) δ 36.3 (q, <sup>3</sup>*J*<sub>C,F</sub> = 1.0 Hz, C-6*a*), 36.5, 41.6, 73.9 (q, <sup>2</sup>*J*<sub>C,F</sub> = 30.8 Hz, C-6), 85.5, 106.5, 117.1, 118.1, 122.3, 123.4, 123.5 (q, <sup>1</sup>*J*<sub>C,F</sub> = 287.6 Hz, CF<sub>3</sub>), 128.7 (2C), 128.8 (2C), 129.2 (2C), 129.3, 129.5, 129.8 (2C), 129.9, 130.9, 134.1, 134.9, 144.4, 149.4, 179.9, 191.7. HRMS (ESI) *m/z*: [M + H]<sup>+</sup> calcd for C<sub>29</sub>H<sub>23</sub>F<sub>3</sub>NO<sub>5</sub> 522.1523, found 522.1521.

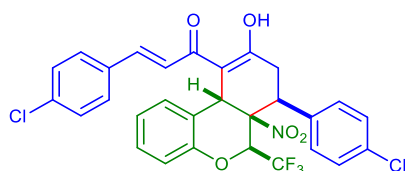

(*E*)-3-(4-Chlorophenyl)-1-((6*S*\*,6*aR*\*,7*S*\*,10*aR*\*)-7-(4-chlorophenyl)-9-hydroxy-6*a*-nitro-6-(trifluoromethyl)-6*a*,7,8,10*a*-tetrahydro-6*H*-benzo[*c*]chromen-10-yl)prop-2-en-1-one (**6b**). Obtained from **1a** (61 mg) and **4b** (86 mg) according to the general procedure and recrystallized from MeOH. Yield 140 mg (95%), light-yellow powder, mp 199–200 °C. IR (ATR): 1629, 1587, 1548, 1489, 1453, 1373, 1283, 1267 cm<sup>-1</sup>; <sup>1</sup>H NMR (500 MHz, CDCl<sub>3</sub>) δ 2.68 (dd, *J* = 19.0, 5.4 Hz, 1H), 2.91 (dd, *J* = 19.0, 13.6 Hz, 1H), 3.72 (dd, *J* = 13.6, 5.4 Hz, 1H), 4.90 (q, <sup>3</sup>*J*<sub>H,F</sub> = 7.1 Hz, 1H), 4.94 (s, 1H), 6.93 (d, *J* = 15.3 Hz, 1H), 7.04–7.09 (m, 1H), 7.12–7.19 (m, 2H), 7.23 (d, *J* = 8.6 Hz, 2H), 7.34 (t, *J* = 7.8 Hz, 1H), 7.37 (d, *J* = 8.5 Hz, 2H), 7.41 (d, *J* = 8.6 Hz, 2H), 7.48 (d, *J* = 8.5 Hz, 2H), 7.99 (d, *J* = 15.3 Hz, 1H), 16.88 (s, 1H); <sup>19</sup>F NMR (376 MHz, CDCl<sub>3</sub>) δ 91.12 (d, *J* = 7.1 Hz, CF<sub>3</sub>); <sup>13</sup>C{<sup>1</sup>H} NMR (126 MHz, CDCl<sub>3</sub>) δ 36.2 (q, <sup>3</sup>*J*<sub>C,F</sub> = 1.0 Hz, C-6*a*), 36.4, 41.0, 73.8 (q, <sup>2</sup>*J*<sub>C,F</sub> = 31.2 Hz, C-6), 85.4, 106.4, 117.2, 118.5, 122.1, 123.3 (q, <sup>1</sup>*J* = 287.6 Hz, CF<sub>3</sub>), 123.6, 129.0 (2C), 129.3, 129.5 (2C), 129.8 (2C), 130.0,

131.2 (2C), 132.5, 133.3, 135.4, 136.9, 143.0, 149.3, 179.6, 191.4. Anal. Calcd for  $C_{29}H_{20}Cl_2F_3NO_5 \cdot 1.5H_2O$ : C, 56.42; H, 3.76; N, 2.27. Found: C, 56.67; H, 3.49; N, 2.25.

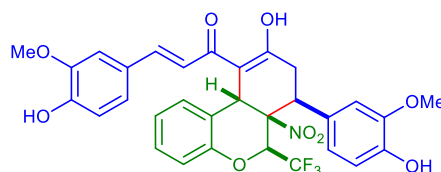

(*E*)-3-(4-Hydroxy-3-methoxyphenyl)-1-((6*S*\*,6*aR*\*,7*S*\*,10*aR*\*)-9-hydroxy-7-(4-hydroxy-3-methoxyphenyl)-6*a*-nitro-6-(trifluoromethyl)-6*a*,7,8,10*a*-tetrahydro-6*H*-benzo[*c*]chromen-10-yl)prop-2-en-1-one (**6c**). Obtained from **1a** (61 mg) and **4c** (92 mg) according to the general procedure and purified by column chromatography (EtOAc-hexane, 1:1). Yield 134 mg (87%), yellow powder, mp 206–207 °C. IR (ATR): 2964, 2924, 1601, 1585, 1549, 1512, 1485, 1454, 1371, 1266  $cm^{-1}$ ;  $^1H$  NMR (500 MHz,  $CDCl_3$ )  $\delta$  2.68 (dd,  $J = 19.0, 5.4$  Hz, 1H), 2.89 (dd,  $J = 19.0, 13.5$  Hz, 1H), 3.66 (dd,  $J = 13.5, 5.4$  Hz, 1H), 3.90 (s, 3H), 3.92 (s, 3H), 4.93 (s, 1H), 4.99 (q,  $^3J_{H,F} = 7.2$  Hz, 1H), 5.70 (s, 1H), 5.90 (s, 1H), 6.76 (s, 1H), 6.81 (dd,  $J = 8.2, 1.5$  Hz, 1H), 6.82 (d,  $J = 15.2$  Hz, 1H), 6.94 (d,  $J = 8.3$  Hz, 2H), 7.01 (d,  $J = 1.7$  Hz, 1H), 7.05 (t,  $J = 7.7$  Hz, 1H), 7.12–7.20 (m, 3H), 7.32 (t,  $J = 7.7$  Hz, 1H), 7.97 (d,  $J = 15.2$  Hz, 1H), 17.05 (s, 1H);  $^{19}F$  NMR (376 MHz,  $CDCl_3$ )  $\delta$  91.13 (d,  $J = 7.2$  Hz,  $CF_3$ );  $^{13}C\{^1H\}$  NMR (126 MHz,  $CDCl_3$ )  $\delta$  36.3 (q,  $^3J_{C,F} = 1.0$  Hz, C-6a), 36.7, 41.5, 56.1, 56.2, 74.0 (q,  $^2J = 30.9$  Hz, C-6), 85.8, 106.2, 110.7, 111.9, 114.4, 115.2, 115.7, 116.9, 122.6, 123.3, 123.4, 123.5, 123.6 (q,  $^1J = 287.5$  Hz,  $CF_3$ ), 125.8, 127.6, 129.6, 129.8, 144.6, 146.5, 146.6, 147.0, 148.7, 149.4, 180.9, 190.7. HRMS (ESI)  $m/z$ :  $[M + H]^+$  calcd for  $C_{31}H_{27}F_3NO_9$  614.1632, found 614.1631.

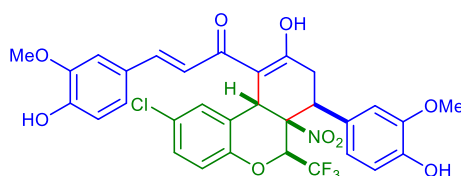

(*E*)-1-((6*S*\*,6*aR*\*,7*S*\*,10*aR*\*)-2-Chloro-9-hydroxy-7-(4-hydroxy-3-methoxyphenyl)-6*a*-nitro-6-(trifluoromethyl)-6*a*,7,8,10*a*-tetrahydro-6*H*-benzo[*c*]chromen-10-yl)-3-(4-hydroxy-3-methoxyphenyl)prop-2-en-1-one (**6d**). Obtained from **1b** (70 mg) and **4c** (92 mg) according to the general procedure and purified by column chromatography (EtOAc-hexane, 1:1). Yield 137 mg (84%), yellow powder, mp 152–153 °C. IR (ATR): 2921, 2851, 1602, 1552, 1514, 1467, 1455, 1371, 1264  $cm^{-1}$ ;  $^1H$  NMR (500 MHz,  $CDCl_3$ )  $\delta$  2.70 (dd,  $J = 19.1, 5.5$  Hz, 1H), 2.89 (dd,  $J = 19.1, 13.5$  Hz, 1H), 3.61 (dd,  $J = 13.5, 5.5$  Hz, 1H), 3.91 (s, 3H), 3.92 (s, 3H), 4.90 (s, 1H), 4.99 (q,  $^3J_{H,F} = 7.1$  Hz, 1H), 5.73 (s, 1H), 5.93 (s, 1H), 6.72 (d,  $J = 1.7$  Hz, 1H), 6.77 (d,  $J = 15.2$  Hz, 1H), 6.78 (dd,  $J = 8.4, 1.7$  Hz, 1H), 6.94 (d,  $J = 8.7$  Hz, 1H), 6.95 (d,  $J = 8.4$  Hz, 1H), 7.02 (d,  $J = 1.7$  Hz, 1H), 7.09 (d,  $J = 8.7$  Hz, 1H), 7.13 (d,  $J = 2.2$  Hz, 1H), 7.19 (dd,  $J = 8.3, 1.7$  Hz, 1H), 7.29 (dd,  $J = 8.7, 2.2$  Hz, 1H), 8.01 (d,  $J = 15.2$  Hz, 1H), 17.06 (s,

1H);  $^{19}\text{F}$  NMR (376 MHz,  $\text{CDCl}_3$ )  $\delta$  91.15 (d,  $J = 7.1$  Hz,  $\text{CF}_3$ );  $^{13}\text{C}\{^1\text{H}\}$  NMR (126 MHz,  $\text{CDCl}_3$ )  $\delta$  36.3 (q,  $^3J_{\text{C,F}} = 1.5$  Hz, C-6a), 36.7, 41.7, 56.1, 74.1 (q,  $^2J_{\text{C,F}} = 31.0$  Hz, C-6), 56.2, 85.4, 105.6, 111.0, 111.8, 114.5, 115.1, 115.3, 118.4, 123.3, 123.4 (q,  $^1J_{\text{C,F}} = 287.5$  Hz,  $\text{CF}_3$ ), 123.5, 124.5, 125.5, 127.5, 128.7, 129.4 (2C), 130.0, 145.4, 146.6, 147.0, 148.1, 148.9, 180.8, 190.7. HRMS (ESI)  $m/z$ :  $[\text{M} + \text{H}]^+$  calcd for  $\text{C}_{31}\text{H}_{26}\text{ClF}_3\text{NO}_9$  648.1243, found 648.1251.

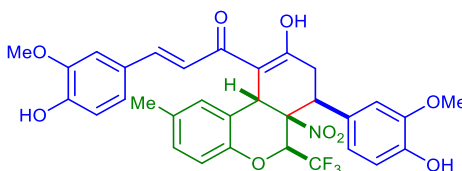

(*E*)-3-(4-Hydroxy-3-methoxyphenyl)-1-((6*S*\*,6*aR*\*,7*S*\*,10*aR*\*)-9-hydroxy-7-(4-hydroxy-3-methoxyphenyl)-2-methyl-6*a*-nitro-6-(trifluoromethyl)-6*a*,7,8,10*a*-tetrahydro-6*H*-benzo[*c*]chromen-10-yl)prop-2-en-1-one (**6e**). Obtained from **1h** (65 mg) and **4c** (92 mg) according to the general procedure and purified by column chromatography (EtOAc-hexane, 1:1). Yield 130 mg (83%), yellow powder, mp 165–166 °C. IR (ATR): 3502, 3405, 1589, 1552, 1517, 1495, 1452, 1371, 1267  $\text{cm}^{-1}$ ;  $^1\text{H}$  NMR (500 MHz,  $\text{CDCl}_3$ )  $\delta$  2.24 (s, 3H), 2.67 (dd,  $J = 19.0, 5.5$  Hz, 1H), 2.88 (dd,  $J = 19.0, 13.5$  Hz, 1H), 3.68 (dd,  $J = 13.5, 5.5$  Hz, 1H), 3.91 (s, 6H), 4.91 (s, 1H), 4.96 (q,  $^3J_{\text{H,F}} = 7.3$  Hz, 1H), 5.71 (s, 1H), 5.92 (s, 1H), 6.76 (d,  $J = 1.7$  Hz, 1H), 6.81 (dd,  $J = 8.1, 1.7$  Hz, 1H), 6.83 (d,  $J = 15.2$  Hz, 1H), 6.92 (d,  $J = 1.4$  Hz, 1H), 6.93 (d,  $J = 8.1$  Hz, 1H), 6.94 (d,  $J = 8.4$  Hz, 1H), 7.01 (d,  $J = 1.7$  Hz, 1H), 7.03 (d,  $J = 8.2$  Hz, 1H), 7.11 (dd,  $J = 8.2, 1.4$  Hz, 1H), 7.17 (dd,  $J = 8.4, 1.7$  Hz, 1H), 7.98 (d,  $J = 15.2$  Hz, 1H), 17.05 (s, 1H);  $^{19}\text{F}$  NMR (376 MHz,  $\text{CDCl}_3$ )  $\delta$  91.13 (d,  $J = 7.3$  Hz,  $\text{CF}_3$ );  $^{13}\text{C}\{^1\text{H}\}$  NMR (126 MHz,  $\text{CDCl}_3$ )  $\delta$  21.0, 36.2 (br. s, C-6a), 36.7, 41.5, 56.1, 56.1, 73.9 (q,  $^2J_{\text{C,F}} = 31.0$  Hz, C-6), 85.9, 106.3, 110.8, 111.9, 114.4, 115.2, 115.8, 116.7, 122.2, 123.2, 123.4, 123.6 (q,  $^1J_{\text{C,F}} = 287.5$  Hz,  $\text{CF}_3$ ), 125.9, 127.6, 129.8, 130.4, 132.8, 144.6, 146.4, 146.5, 147.0, 147.2, 148.7, 180.9, 190.6. HRMS (ESI)  $m/z$ :  $[\text{M} + \text{H}]^+$  calcd for  $\text{C}_{32}\text{H}_{29}\text{F}_3\text{NO}_9$  628.1789, found 628.1781.

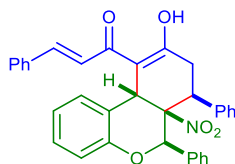

(*E*)-1-((6*R*\*,6*aR*\*,7*S*\*,10*aR*\*)-9-Hydroxy-6*a*-nitro-6,7-diphenyl-6*a*,7,8,10*a*-tetrahydro-6*H*-benzo[*c*]chromen-10-yl)-3-phenylprop-2-en-1-one (**6f**). Obtained from **1k** (64 mg) and **4a** (69 mg) according to the general procedure and purified by column chromatography ( $\text{CH}_2\text{Cl}_2$ -hexane, 2:1). Yield 124 mg (94%), light-yellow powder, mp 224–225 °C. IR (ATR): 1629, 1580, 1543, 1483, 1449, 1354, 1274, 1222  $\text{cm}^{-1}$ ;  $^1\text{H}$  NMR (500 MHz,  $\text{CDCl}_3$ )  $\delta$  2.72 (dd,  $J = 19.1, 5.4$  Hz, 1H), 3.05 (dd,  $J = 19.1, 13.7$  Hz, 1H), 3.76 (dd,  $J = 13.7, 5.4$  Hz, 1H), 4.78 (s, 1H), 5.50 (s, 1H), 6.82 (d,  $J = 15.4$  Hz, 1H), 7.02–7.07

(m, 3H), 7.16 (d,  $J = 7.9$  Hz, 1H), 7.19 (dd,  $J = 8.2, 0.8$  Hz, 1H), 7.24–7.29 (m, 2H), 7.30–7.40 (m, 5H), 7.40–7.48 (m, 7H), 7.93 (d,  $J = 15.4$  Hz, 1H), 16.90 (s, 1H);  $^{13}\text{C}\{^1\text{H}\}$  NMR (126 MHz,  $\text{CDCl}_3$ )  $\delta$  35.4, 37.0, 41.6, 78.1, 91.0, 106.7, 116.8, 118.6, 122.2, 122.9, 126.8 (2C), 128.4 (2C), 128.5 (2C), 128.6, 128.8 (2C), 129.1 (2C), 129.4, 129.7, 129.8, 130.3 (2C), 130.7, 135.0, 135.4, 136.1, 143.7, 151.6, 180.7, 192.1. Anal. Calcd for  $\text{C}_{34}\text{H}_{27}\text{NO}_5$ : C, 77.11; H, 5.14; N, 2.64. Found: C, 77.20; H, 5.22; N, 2.83.

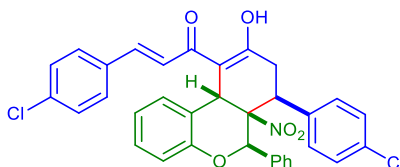

(*E*)-3-(4-Chlorophenyl)-1-((6*R*\*,6*aR*\*,7*S*\*,10*aR*\*)-7-(4-chlorophenyl)-9-hydroxy-6*a*-nitro-6-phenyl-6*a*,7,8,10*a*-tetrahydro-6*H*-benzo[*c*]chromen-10-yl)prop-2-en-1-one (**6g**). Obtained from **1k** (64 mg) and **4b** (86 mg) according to the general procedure and purified by column chromatography ( $\text{CH}_2\text{Cl}_2$ -hexane, 2:1). Yield 127 mg (85%), light-yellow powder, mp 154–155 °C. IR (ATR): 1632, 1582, 1549, 1483, 1449, 1358, 1278, 1221  $\text{cm}^{-1}$ ;  $^1\text{H}$  NMR (500 MHz,  $\text{CDCl}_3$ )  $\delta$  2.70 (dd,  $J = 19.1, 5.4$  Hz, 1H), 2.98 (dd,  $J = 19.1, 13.7$  Hz, 1H), 3.73 (dd,  $J = 13.7, 5.4$  Hz, 1H), 4.74 (s, 1H), 5.45 (s, 1H), 6.75 (d,  $J = 15.4$  Hz, 1H), 7.02–7.08 (m, 3H), 7.13 (dd,  $J = 7.8, 0.8$  Hz, 1H), 7.19 (d,  $J = 8.1$  Hz, 1H), 7.27 (m, 2H), 7.31–7.45 (m, 10H), 7.87 (d,  $J = 15.4$  Hz, 1H), 16.82 (s, 1H);  $^{13}\text{C}\{^1\text{H}\}$  NMR (126 MHz,  $\text{CDCl}_3$ )  $\delta$  35.3, 36.9, 41.0, 78.1, 90.9, 106.6, 116.9, 118.9, 122.3, 122.7, 126.7 (2C), 128.7 (2C), 128.9 (2C), 129.3, 129.4 (2C), 129.6 (2C), 129.8, 130.0, 131.6 (2C), 133.4, 133.9, 134.6, 135.8, 136.7, 142.3, 151.5, 180.3, 191.9. Anal. Calcd for  $\text{C}_{34}\text{H}_{25}\text{Cl}_2\text{NO}_5$ : C, 68.24; H, 4.21; N, 2.34. Found: C, 68.00; H, 4.12; N, 2.28.

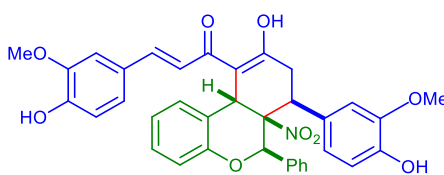

(*E*)-3-(4-Hydroxy-3-methoxyphenyl)-1-((6*R*\*,6*aR*\*,7*S*\*,10*aR*\*)-9-hydroxy-7-(4-hydroxy-3-methoxyphenyl)-6*a*-nitro-6-phenyl-6*a*,7,8,10*a*-tetrahydro-6*H*-benzo[*c*]chromen-10-yl)prop-2-en-1-one (**6h**). Obtained from **1k** (64 mg) and **4c** (92 mg) according to the general procedure and purified by column chromatography (EtOAc-hexane, 2:3). Yield 137 mg (88%), yellow powder, mp 171–172 °C. IR (ATR): 3501, 3389, 1601, 1582, 1544, 1512, 1484, 1450, 1267  $\text{cm}^{-1}$ ;  $^1\text{H}$  NMR (500 MHz,  $\text{CDCl}_3$ )  $\delta$  2.70 (dd,  $J = 19.0, 5.4$  Hz, 1H), 2.96 (dd,  $J = 19.0, 13.7$  Hz, 1H), 3.69 (dd,  $J = 13.7, 5.4$  Hz, 1H), 3.89 (s, 3H), 3.94 (s, 3H), 4.73 (s, 1H), 5.54 (s, 1H), 5.71 (s, 1H), 5.90 (s, 1H), 6.65 (d,  $J = 15.3$  Hz, 1H), 6.89–6.93 (m, 2H), 6.94–6.97 (m, 3H), 7.02–7.08 (m, 4H), 7.16 (dd,  $J = 7.5, 5.1$  Hz, 2H), 7.23 (t,  $J = 7.6$  Hz, 2H), 7.30 (t,  $J = 7.6$  Hz, 1H), 7.36 (t,  $J = 7.6$  Hz, 1H), 7.86 (d,  $J = 15.3$  Hz, 1H), 16.96 (s, 1H);

$^{13}\text{C}\{^1\text{H}\}$  NMR (126 MHz,  $\text{CDCl}_3$ )  $\delta$  35.4, 37.2, 41.4, 56.0, 56.1, 78.1, 91.2, 106.4, 110.2, 112.6, 114.2, 115.1, 116.1, 116.6, 122.2, 123.2, 123.3, 123.6, 126.9 (2C), 127.2, 127.7, 128.7 (2C), 129.5, 129.6, 129.8, 136.3, 143.9, 145.9, 146.3, 146.9, 148.5, 151.6, 181.4, 191.1. HRMS (ESI)  $m/z$ :  $[\text{M} + \text{H}]^+$  calcd for  $\text{C}_{36}\text{H}_{32}\text{NO}_9$  622.2072, found 622.2069.

### General procedure for the synthesis of 1*H*,6*H*-hexahydrochromeno[6,5-*c*]chromen-1-ones 7

**Method A.** A mixture of the appropriate 10-cinnamoylhexahydro-9*H*-benzo[*c*]chromen-9-one **6** (0.25 mmol) and  $\text{Cs}_2\text{CO}_3$  (20 mg, 0.06 mmol) was dissolved in chloroform (3 mL) and refluxed for 48 h (TLC control). Precipitate was filtered off and the residue was evaporated under reduced pressure to complete dryness. Residue was purified by column chromatography with eluent specified below to give target products **7**.

**Method B.** A mixture of the appropriate 2*H*-nitrochromene **1** (0.25 mmol), curcuminoid **4** (0.25 mmol) and  $\text{Cs}_2\text{CO}_3$  (20 mg, 0.06 mmol) was dissolved in chloroform (3 mL) and refluxed for 72 h (TLC control). Upon completion of the reaction formed dark solution was quenched with hexane (4 ml), precipitate was filtered off and the residue was evaporated under reduced pressure to complete dryness. Residue was purified by column chromatography with eluent specified below to give target products **7**.

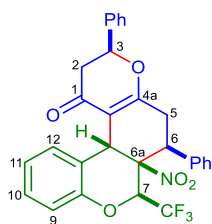

(3*S*\*,6*S*\*,6*a**R*\*,7*S*\*,12*b**R*\*)-6*a*-Nitro-3,6-diphenyl-7-(trifluoromethyl)-2,3,5,6*a*,7,12*b*-hexahydro-1*H*,6*H*-chromeno[6,5-*c*]chromen-1-one (**7a**). Obtained according to the general procedure **A** from **6a** (131 mg) or according to the general procedure **B** from **1a** (61 mg) and **4a** (69 mg) and purified by column chromatography ( $\text{CH}_2\text{Cl}_2$ -hexane, 2:1). Yield 89 mg (68%), white powder, mp 168–169 °C. IR (ATR): 1665, 1615, 1585, 1549, 1487, 1454, 1373, 1309, 1272  $\text{cm}^{-1}$ ;  $^1\text{H}$  NMR (500 MHz,  $\text{CDCl}_3$ )  $\delta$  2.58 (dd,  $J = 18.8, 5.5$  Hz, 1H), 2.92 (dd,  $J = 17.3, 3.2$  Hz, 1H), 2.99 (dd,  $J = 18.8, 13.1$  Hz, 1H), 3.08 (dd,  $J = 17.3, 15.0$  Hz, 1H), 3.77 (dd,  $J = 13.1, 5.5$  Hz, 1H), 4.89 (q,  $^3J_{\text{H,F}} = 7.2$  Hz, 1H), 5.09 (s, 1H), 5.43 (dd,  $J = 15.0, 3.2$  Hz, 1H), 7.10 (dd,  $J = 14.6, 7.3$  Hz, 2H), 7.27–7.33 (m, 4H), 7.39–7.47 (m, 8H);  $^{19}\text{F}$  NMR (376 MHz,  $\text{CDCl}_3$ )  $\delta$  91.69 (d,  $J = 7.2$  Hz,  $\text{CF}_3$ );  $^{13}\text{C}\{^1\text{H}\}$  NMR (126 MHz,  $\text{CDCl}_3$ )  $\delta$  31.2, 33.8 (q,  $^3J_{\text{C,F}} = 1.0$  Hz, C-6*a*), 42.3, 42.8, 73.7 (q,  $^2J_{\text{C,F}} = 31.2$  Hz, C-7), 80.2, 85.2, 113.2, 116.7, 123.3 (q,  $^1J_{\text{C,F}} = 287.8$  Hz,  $\text{CF}_3$ ), 123.5, 123.6, 126.5 (2C), 128.8 (2C), 129.1, 129.1 (2C), 129.3, 129.3, 129.8, 129.9 (2C), 134.2, 137.5, 148.8, 169.3, 191.2. HRMS (ESI)  $m/z$ :  $[\text{M} + \text{Na}]^+$  calcd for  $\text{C}_{29}\text{H}_{22}\text{F}_3\text{NNaO}_5$  544.1342, found 544.1335.

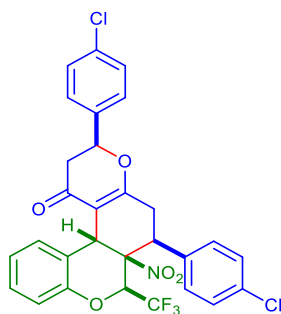

(3*S*\*,6*S*\*,6*aR*\*,7*S*\*,12*bR*\*)-3,6-Bis(4-chlorophenyl)-6*a*-nitro-7-(trifluoromethyl)-2,3,5,6*a*,7,12*b*-hexahydro-1*H*,6*H*-chromeno[6,5-*c*]chromen-1-one (**7b**). Obtained according to the general procedure **A** from **6b** (148 mg) or according to the general procedure **B** from **1a** (61 mg) and **4b** (86 mg) and purified by column chromatography (CH<sub>2</sub>Cl<sub>2</sub>-hexane, 2:1). Yield 120 mg (81%), white powder, mp 258–259 °C. IR (ATR): 1672, 1622, 1557, 1494, 1454, 1370, 1314, 1273 cm<sup>-1</sup>; <sup>1</sup>H NMR (500 MHz, CDCl<sub>3</sub>) δ 2.56 (dd, *J* = 18.8, 5.4 Hz, 1H), 2.87–2.96 (m, 2H), 3.03 (dd, *J* = 17.3, 14.8 Hz, 1H), 3.74 (dd, *J* = 13.1, 5.4 Hz, 1H), 4.84 (q, <sup>3</sup>*J*<sub>H,F</sub> = 7.1 Hz, 1H), 5.08 (s, 1H), 5.41 (dd, *J* = 14.8, 3.3 Hz, 1H), 7.09 (dd, *J* = 14.0, 7.3 Hz, 2H), 7.22–7.26 (m, 2H), 7.26–7.32 (m, 2H), 7.35–7.44 (m, 6H); <sup>19</sup>F NMR (376 MHz, CDCl<sub>3</sub>) δ 91.51 (d, *J* = 7.1 Hz, CF<sub>3</sub>); <sup>13</sup>C{<sup>1</sup>H} NMR (126 MHz, CDCl<sub>3</sub>) δ 31.1, 33.7 (q, <sup>3</sup>*J*<sub>C,F</sub> = 1.2 Hz, C-6*a*), 41.8, 42.8, 73.6 (q, <sup>2</sup>*J*<sub>C,F</sub> = 31.3 Hz, C-7), 79.5, 85.1, 113.3, 116.8, 123.2 (q, *J* = 287.4 Hz, CF<sub>3</sub>), 123.4, 123.6, 127.8 (2C), 129.0 (2C), 129.2, 129.4 (2C), 129.8, 131.2 (2C), 132.6, 135.3, 135.5, 135.9, 148.6, 168.7, 190.7. HRMS (ESI) *m/z*: [M + H]<sup>+</sup> calcd for C<sub>29</sub>H<sub>20</sub>Cl<sub>2</sub>F<sub>3</sub>NNaO<sub>5</sub> 590.0743, found 590.0747.

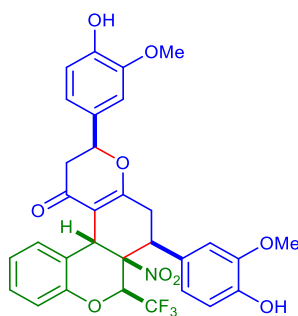

(3*S*\*,6*S*\*,6*aR*\*,7*S*\*,12*bR*\*)-3,6-Bis(4-hydroxy-3-methoxyphenyl)-6*a*-nitro-7-(trifluoromethyl)-2,3,5,6*a*,7,12*b*-hexahydro-1*H*,6*H*-chromeno[6,5-*c*]chromen-1-one (**7c**). Obtained according to the general procedure **A** from **6c** (154 mg) or according to the general procedure **B** from **1a** (61 mg) and **4c** (92 mg) as a 81:19 mixture with **7c** and purified by column chromatography (EtOAc-hexane, 1:1) but was not obtained in pure form. Yield 94 mg (61%), yellow powder, mp 170–171 °C. IR (ATR): 2970, 2940, 1664, 1617, 1551, 1518, 1487, 1453, 1370, 1271 cm<sup>-1</sup>; <sup>1</sup>H NMR (500 MHz, CDCl<sub>3</sub>) δ 2.56 (dd, *J* = 19.1, 5.4 Hz, 1H), 2.88 (dd, *J* = 17.2, 3.1 Hz, 1H), 2.89 (dd, *J* = 19.1, 12.9 Hz, 1H), 3.08 (dd, *J* = 17.2, 15.0 Hz, 1H), 3.69 (dd, *J* = 12.9, 5.4 Hz, 1H), 3.90 (s, 3H), 3.95 (s, 3H), 4.94 (q, <sup>3</sup>*J*<sub>H,F</sub> = 7.2 Hz, 1H), 5.07 (s, 1H), 5.34 (dd, *J* = 15.0, 3.1 Hz, 1H), 5.72 (s, 1H), 5.73 (s, 1H), 6.76 (s, 1H), 6.90–6.98 (m, 5H),

7.06–7.11 (m, 2H), 7.26–7.31 (m, 2H);  $^{19}\text{F}$  NMR (376 MHz,  $\text{CDCl}_3$ )  $\delta$  91.65 (d,  $J = 7.2$  Hz,  $\text{CF}_3$ );  $^{13}\text{C}\{^1\text{H}\}$  NMR (151 MHz,  $\text{CDCl}_3$ )  $\delta$  31.5, 33.7 (q,  $^1J_{\text{C,F}} = 0.8$  Hz, C-6a), 42.2, 42.7, 56.1, 56.2, 73.61 (q,  $^2J_{\text{C,F}} = 31.0$  Hz, C-7), 80.4, 85.3, 109.0, 113.1, 114.5, 114.7, 116.6, 120.2, 123.3 (q,  $^1J_{\text{C,F}} = 287.8$  Hz,  $\text{CF}_3$ ), 123.2, 123.4, 123.6, 125.7, 129.1, 129.2, 129.5, 129.8, 146.5 (2C), 146.7, 147.0, 148.7, 169.5, 191.5. HRMS (ESI)  $m/z$ :  $[\text{M} + \text{Na}]^+$  calcd for  $\text{C}_{31}\text{H}_{27}\text{F}_3\text{NO}_9$  614.1632, found 614.1632.

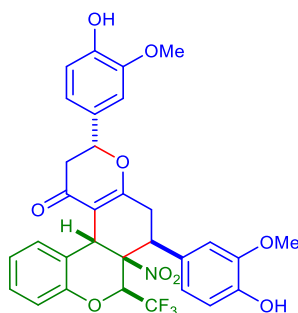

( $3R^*$ , $6S^*$ , $6aR^*$ , $7S^*$ , $12bR^*$ )-3,6-Bis(4-hydroxy-3-methoxyphenyl)-6a-nitro-7-(trifluoromethyl)-2,3,5,6a,7,12b-hexahydro-1H,6H-chromeno[6,5-c]chromen-1-one (**7'c**). Obtained as a 19:81 mixture with **7c** and was not isolated in pure form.  $^1\text{H}$  NMR (500 MHz,  $\text{CDCl}_3$ )  $\delta$  2.58 (dd,  $J = 19.3, 5.8$  Hz, 1H), 2.79 (dd,  $J = 19.3, 13.1$  Hz, 1H), 2.97 (dd,  $J = 16.4, 4.1$  Hz, 1H), 3.21 (dd,  $J = 16.4, 11.6$  Hz, 1H), 3.60 (dd,  $J = 13.1, 5.8$  Hz, 1H), 3.90 (s, 6H), 4.89 (q,  $^3J_{\text{H,F}} = 7.1$  Hz, 1H), 5.14 (s, 1H), 5.58 (dd,  $J = 11.6, 4.1$  Hz, 1H), 5.69 (s, 1H), 5.71 (s, 1H), 6.79–6.87 (m, 5H), 6.98–7.05 (m, 3H), 7.14–7.19 (m, 1H), 7.24 (d,  $J = 8.0$  Hz, 1H);  $^{19}\text{F}$  NMR (376 MHz,  $\text{CDCl}_3$ )  $\delta$  91.61 (d,  $J = 7.1$  Hz,  $\text{CF}_3$ );  $^{13}\text{C}\{^1\text{H}\}$  NMR (126 MHz,  $\text{CDCl}_3$ )  $\delta$  31.9, 33.6, 42.5, 42.8, 56.1 (2C), 73.5 (q,  $J = 30.8$  Hz), 81.3, 85.4, 109.1, 112.1, 113.2, 114.4, 114.6, 116.7, 119.8, 123.2, 123.3 (q,  $J = 287.8$  Hz), 123.4, 125.7, 129.1, 129.2, 129.5, 129.8, 146.4 (2C), 146.7, 148.7, 146.9, 168.4, 192.0.

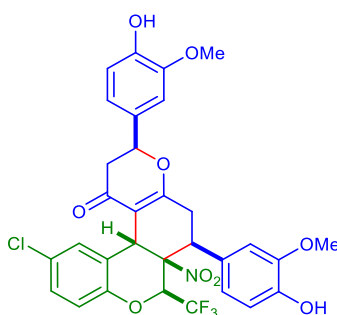

( $3S^*$ , $6S^*$ , $6aR^*$ , $7S^*$ , $12bR^*$ )-11-Chloro-3,6-bis(4-hydroxy-3-methoxyphenyl)-6a-nitro-7-(trifluoromethyl)-2,3,5,6a,7,12b-hexahydro-1H,6H-chromeno[6,5-c]chromen-1-one (**7d**). Obtained according to the general procedure **A** from **6d** (162 mg) or according to the general procedure **B** from **1b** (70 mg) and **4c** (92 mg) as a 91:9 mixture with **7'd** and purified by column chromatography (EtOAc-hexane, 1:1). Yield 117 mg (72%), light-yellow powder, mp 160–161 °C. IR (ATR): 2927, 2851, 1662, 1604, 1552, 1519, 1477, 1455, 1370, 1271  $\text{cm}^{-1}$ ;  $^1\text{H}$  NMR (500 MHz,  $\text{CDCl}_3$ )  $\delta$  2.59 (dd,  $J = 18.9, 5.4$



Hz, 1H), 2.85–2.93 (m, 2H), 3.07 (dd,  $J = 17.3, 15.0$  Hz, 1H), 3.62 (dd,  $J = 13.0, 5.4$  Hz, 1H), 3.90 (s, 3H), 3.95 (s, 3H), 4.93 (q,  $^3J_{\text{H,F}} = 7.1$  Hz, 1H), 5.03 (s, 1H), 5.38 (dd,  $J = 15.0, 3.1$  Hz, 1H), 5.72 (s, 1H), 5.73 (s, 1H), 6.73 (s, 1H), 6.77–6.83 (m, 1H), 6.92–6.99 (m, 4H), 7.03 (d,  $J = 8.4$  Hz, 1H), 7.22–7.26 (m, 2H);  $^{19}\text{F}$  NMR (376 MHz,  $\text{CDCl}_3$ )  $\delta$  91.67 (d,  $J = 7.1$  Hz,  $\text{CF}_3$ );  $^{13}\text{C}\{^1\text{H}\}$  NMR (126 MHz,  $\text{CDCl}_3$ )  $\delta$  31.5, 33.8 (br. s, C-6a), 42.4, 42.5, 56.1, 56.2, 73.7 (q,  $^2J_{\text{C,F}} = 31.1$  Hz, C-7), 80.4, 85.0, 109.1, 111.7, 112.4, 114.5, 114.8, 118.0, 120.2, 123.2 (q,  $^1J_{\text{C,F}} = 287.5$  Hz,  $\text{CF}_3$ ), 123.4, 125.4, 125.4, 128.6, 129.1, 129.3, 129.6, 146.6, 146.6, 146.7, 147.0, 147.5, 169.8, 191.4. Anal. Calcd for  $\text{C}_{31}\text{H}_{25}\text{ClF}_3\text{NO}_9$ : C, 57.46; H, 3.89; N, 2.16. Found: C, 57.27; H, 3.92; N, 2.37.

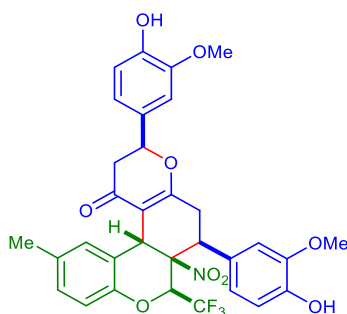

(3*S*\*,6*S*\*,6*aR*\*,7*S*\*,12*bR*\*)-3,6-Bis(4-hydroxy-3-methoxyphenyl)-11-methyl-6a-nitro-7-(trifluoromethyl)-2,3,5,6*a*,7,12*b*-hexahydro-1*H*,6*H*-chromeno[6,5-*c*]chromen-1-one (**7e**). Obtained according to the general procedure **A** from **6e** (157 mg) or according to the general procedure **B** from **1h** (mg) and **4c** as a 95:5 mixture with **7'e** and purified by column chromatography (EtOAc-hexane, 1:1). Yield 115 mg (73%), yellow powder, mp 172–173 °C. IR (ATR): 3518, 3405, 1663, 1610, 1550, 1519, 1495, 1455, 1370, 1271  $\text{cm}^{-1}$ ;  $^1\text{H}$  NMR (500 MHz,  $\text{CDCl}_3$ )  $\delta$  2.32 (s, 3H), 2.56 (dd,  $J = 18.8, 5.4$  Hz, 1H), 2.84–2.93 (m, 2H), 3.08 (dd,  $J = 17.1, 15.0$  Hz, 1H), 3.70 (dd,  $J = 13.0, 5.4$  Hz, 1H), 3.90 (s, 3H), 3.95 (s, 3H), 4.90 (q,  $^3J_{\text{H,F}} = 7.2$  Hz, 1H), 5.03 (s, 1H), 5.36 (dd,  $J = 15.0, 2.9$  Hz, 1H), 5.73 (s, 1H), 5.75 (s, 1H), 6.76 (s, 1H), 6.80–6.86 (m, 1H), 6.91–6.99 (m, 5H), 7.03 (s, 1H), 7.07 (d,  $J = 8.2$  Hz, 1H);  $^{19}\text{F}$  NMR (376 MHz,  $\text{CDCl}_3$ )  $\delta$  91.62 (d,  $J = 7.2$  Hz,  $\text{CF}_3$ );  $^{13}\text{C}\{^1\text{H}\}$  NMR (126 MHz,  $\text{CDCl}_3$ )  $\delta$  21.0, 31.6, 33.7 (br. s, C-6a), 42.3, 42.7, 56.1, 56.2, 73.7 (q,  $^2J_{\text{C,F}} = 31.3$  Hz, C-7), 80.2, 85.6, 96.3, 109.1, 112.0, 113.1, 114.5, 114.8, 116.4, 120.3, 123.3, 123.4 (q,  $^1J_{\text{C,F}} = 288.0$  Hz,  $\text{CF}_3$ ), 123.41, 125.8, 129.3, 129.8, 129.8, 132.9, 146.5, 146.6, 146.7, 147.0, 169.4, 191.4. HRMS (ESI)  $m/z$ :  $[\text{M} + \text{H}]^+$  calcd for  $\text{C}_{32}\text{H}_{29}\text{F}_3\text{NO}_9$  628.1789, found 628.1785.

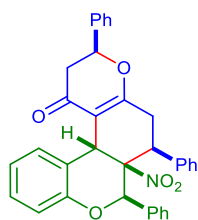

(3*S*\*,6*S*\*,6*aR*\*,7*R*\*,12*bR*\*)-6*a*-Nitro-3,6,7-triphenyl-2,3,5,6*a*,7,12*b*-hexahydro-1*H*,6*H*-chromeno[6,5-*c*]chromen-1-one (**7f**). Obtained according to the general procedure **A** from **6f** (133 mg) or according to the general procedure **B** from **1k** (64 mg) and **4a** (69 mg) and purified by column chromatography (CH<sub>2</sub>Cl<sub>2</sub>-hexane, 2:1). Yield 121 mg (91%), white powder, mp 275–276 °C. IR (ATR): 1658, 1605, 1581, 1541, 1484, 1449, 1369, 1278, 1225 cm<sup>-1</sup>; <sup>1</sup>H NMR (500 MHz, CDCl<sub>3</sub>) δ 2.60 (dd, *J* = 18.9, 5.5 Hz, 1H), 2.85 (dd, *J* = 17.2, 3.3 Hz, 1H), 2.97 (dd, *J* = 17.2, 14.8 Hz, 1H), 3.06 (dd, *J* = 18.9, 13.2 Hz, 1H), 3.81 (dd, *J* = 13.2, 5.5 Hz, 1H), 4.88 (s, 1H), 5.44 (s, 1H), 5.44 (dd, *J* = 14.8, 3.3 Hz, 1H), 7.00 (d, *J* = 7.6 Hz, 2H), 7.08 (t, *J* = 7.6 Hz, 1H), 7.13 (d, *J* = 8.1 Hz, 1H), 7.19 (t, *J* = 7.6 Hz, 2H), 7.23–7.29 (m, 2H), 7.33 (t, *J* = 7.6 Hz, 1H), 7.38–7.48 (m, 10H); <sup>13</sup>C{<sup>1</sup>H} NMR (126 MHz, CDCl<sub>3</sub>) δ 31.8, 32.9, 42.4, 42.8, 77.7, 80.2, 90.6, 113.3, 116.6, 122.2, 123.8, 126.4 (2C), 127.2 (2C), 128.4 (2C), 128.6, 128.9 (2C), 129.0 (2C), 129.1, 129.2, 129.3, 129.8, 130.3 (2C), 135.5, 135.6, 137.7, 150.8, 169.9, 191.4. HRMS (ESI) *m/z*: [M + Na]<sup>+</sup> calcd for C<sub>34</sub>H<sub>28</sub>NO<sub>5</sub> 530.1962, found 530.1958.

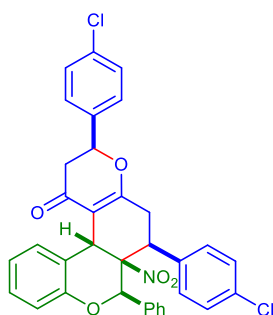

(3*S*\*,6*S*\*,6*aR*\*,7*R*\*,12*bR*\*)-3,6-Bis(4-chlorophenyl)-6*a*-nitro-7-triphenyl-2,3,5,6*a*,7,12*b*-hexahydro-1*H*,6*H*-chromeno[6,5-*c*]chromen-1-one (**7g**). Obtained according to the general procedure **A** from **6g** (150 mg) or according to the general procedure **B** from **1k** (64 mg) and **4b** (86 mg) and purified by column chromatography (CH<sub>2</sub>Cl<sub>2</sub>-hexane, 2:1). Yield 132 mg (88%), white powder, mp 272–273 °C. IR (ATR): 1677, 1613, 1584, 1538, 1484, 1450, 1356, 1273, 1224 cm<sup>-1</sup>; <sup>1</sup>H NMR (500 MHz, CDCl<sub>3</sub>) δ 2.58 (dd, *J* = 18.8, 5.4 Hz, 1H), 2.83 (dd, *J* = 17.2, 3.7 Hz, 1H), 2.92 (dd, *J* = 17.2, 14.4 Hz, 1H), 2.99 (dd, *J* = 18.8, 13.2 Hz, 1H), 3.77 (dd, *J* = 13.2, 5.4 Hz, 1H), 4.86 (s, 1H), 5.38 (s, 1H), 5.41 (dd, *J* = 14.4, 3.7 Hz, 1H), 6.99 (d, *J* = 7.5 Hz, 2H), 7.07 (td, *J* = 7.5, 1.0 Hz, 1H), 7.12 (dd, *J* = 8.1, 0.9 Hz, 1H), 7.18–7.22 (m, 1H), 7.22–7.29 (m, 2H), 7.30–7.37 (m, 3H), 7.38–7.44 (m, 6H); <sup>13</sup>C{<sup>1</sup>H} NMR (126 MHz, CDCl<sub>3</sub>) δ 31.7, 32.9, 41.9, 42.7, 77.7, 79.4, 90.4, 113.4, 116.7, 122.3, 123.6, 127.1 (2C), 127.8 (2C), 128.7 (2C), 128.9 (2C), 129.3, 129.3 (2C), 129.4, 129.7, 131.6 (2C), 133.9, 134.7, 135.2, 135.2, 136.1, 150.6, 169.4, 190.9. HRMS (ESI) *m/z*: [M + Na]<sup>+</sup> calcd for C<sub>34</sub>H<sub>25</sub>Cl<sub>2</sub>NNaO<sub>5</sub> 620.1002, found 620.0994.

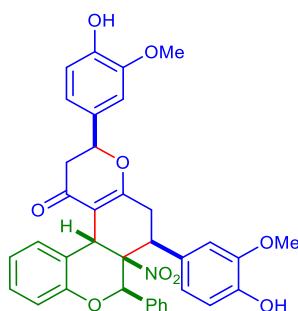

(3*S*\*,6*S*\*,6*aR*\*,7*R*\*,12*bR*\*)-3,6-Bis(4-hydroxy-3-methoxyphenyl)-6*a*-nitro-7-phenyl-2,3,5,6*a*,7,12*b*-hexahydro-1*H*,6*H*-chromeno[6,5-*c*]chromen-1-one (**7h**). Obtained according to the general procedure A from **6h** (156 mg) or according to the general procedure B from **1k** (64 mg) and **4c** (92 mg) as a 78:22 mixture with **7'h**, purified by column chromatography (EtOAc-hexane, 2:3) but was not obtained in pure form. Yield 86 mg (55%), yellow powder, mp 183–184 °C. IR (ATR): 3509, 3383, 1664, 1604, 1542, 1516, 1485, 1451, 1358, 1271 cm<sup>-1</sup>; <sup>1</sup>H NMR (500 MHz, CDCl<sub>3</sub>) δ 2.58 (dd, *J* = 18.7, 5.4 Hz, 1H), 2.81 (dd, *J* = 17.1, 3.1 Hz, 1H), 2.92–3.01 (m, 2H), 3.73 (dd, *J* = 13.1, 5.4 Hz, 1H), 3.93 (s, 3H), 3.94 (s, 3H), 4.87 (s, 1H), 5.35 (dd, *J* = 14.8, 3.1 Hz, 1H), 5.47 (s, 1H), 5.69 (s, 1H), 5.70 (s, 1H), 6.89–6.98 (m, 8H), 7.02 (d, *J* = 7.5 Hz, 2H), 7.06–7.10 (m, 2H), 7.20 (t, *J* = 7.5 Hz, 2H), 7.30–7.34 (m, 1H); <sup>13</sup>C{<sup>1</sup>H} NMR (151 MHz, CDCl<sub>3</sub>) δ 32.2, 32.9, 42.3, 42.7, 56.0, 56.2, 77.7, 80.4, 90.7, 109.0, 112.6, 113.2, 114.2, 114.7, 116.5, 120.2, 122.2, 123.9, 127.1, 127.2 (2C), 128.9 (3C), 129.1, 129.3, 129.4, 129.8, 135.6, 145.9, 146.2, 146.6, 146.9, 150.8, 170.0, 191.6. HRMS (ESI) *m/z*: [M + H]<sup>+</sup> calcd for C<sub>36</sub>H<sub>32</sub>NO<sub>9</sub> 622.2072, found 622.2067.

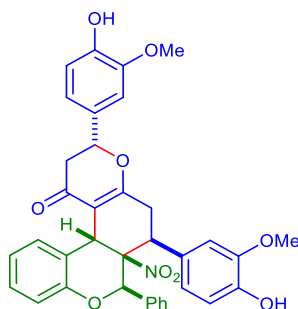

(3*R*\*,6*S*\*,6*aR*\*,7*R*\*,12*bR*\*)-3,6-Bis(4-hydroxy-3-methoxyphenyl)-6*a*-nitro-7-phenyl-2,3,5,6*a*,7,12*b*-hexahydro-1*H*,6*H*-chromeno[6,5-*c*]chromen-1-one (**7'h**). Was not obtained in pure form. Yield 25 mg (16%), yellow powder. <sup>1</sup>H NMR (500 MHz, CDCl<sub>3</sub>) δ 3.17 (dd, *J* = 16.3, 12.0 Hz, 1H), 3.63 (dd, *J* = 13.1, 5.9 Hz, 1H), 3.90 (s, 3H), 3.92 (s, 3H), 4.93 (s, 1H), 5.42 (s, 1H), 5.42–5.46 (m, 1H), 5.68 (s, 2H) (other signals are masked by the isomer **7h**); <sup>13</sup>C{<sup>1</sup>H} NMR (151 MHz, CDCl<sub>3</sub>) δ 32.6, 32.9, 42.2, 42.5, 56.0, 56.1, 77.8, 81.2, 91.1, 109.1, 112.7, 113.5, 114.1, 114.6, 116.4, 119.8, 121.9, 123.5, 127.1 (2C), 127.1, 129.2, 129.4 (2C), 129.5, 129.7, 135.8, 145.9, 146.2, 146.4, 146.8, 150.9, 169.2, 192.0 (2C are masked by the major isomer).

**General procedure for the synthesis of trienes 8.** A mixture of the appropriate 3-nitro-2-phenyl-2-(trifluoromethyl)-2*H*-chromene **2** (0.25 mmol), enedione **3** (0.25 mmol) and DABCO (34 mg, 0.3 mmol) was dissolved in chloroform (4 mL) and refluxed for 72 h (TLC control, CH<sub>2</sub>Cl<sub>2</sub>-hexane (1:1)). Upon completion of the reaction, formed orange solution was evaporated under reduced pressure to complete dryness, triturated with hexane and dried again. Residue was recrystallized from methanol to give target products **8**.

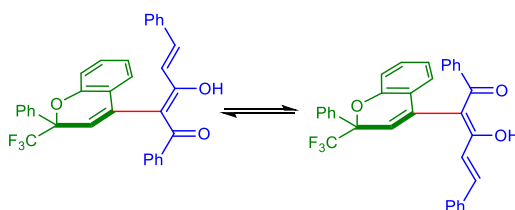

(2*Z*,4*E*)-3-Hydroxy-1,5-diphenyl-2-(2-phenyl-2-(trifluoromethyl)-2*H*-chromen-4-yl)penta-2,4-dien-1-one (**8a**). Obtained according to the general procedure from **2a** (80 mg) and **3a** (63 mg). Yield 105 mg (80%), yellow powder, mp 165–166 °C. IR (ATR): 1622, 1600, 1575, 1482, 1447 cm<sup>-1</sup>; <sup>1</sup>H NMR (500 MHz, CDCl<sub>3</sub>) δ (a mixture of two rotamers in the ratio of 50:50) 6.00 (s, 1H), 6.26 (s, 1H), 6.45 (d, *J* = 15.6 Hz, 1H), 6.72 (d, *J* = 15.6 Hz, 1H), 6.80 (t, *J* = 7.3 Hz, 1H), 6.90 (t, *J* = 7.3 Hz, 1H), 6.96–7.03 (m, 3H), 7.04–7.10 (m, 3H), 7.11–7.42 (m, 26H), 7.56–7.64 (m, 4H), 7.75 (d, *J* = 15.6 Hz, 1H), 7.78 (d, *J* = 15.6 Hz, 1H), 17.57 (s, 1H), 17.73 (s, 1H); <sup>19</sup>F NMR (376 MHz, CDCl<sub>3</sub>) δ 82.62 (s, CF<sub>3</sub>), 82.75 (s, CF<sub>3</sub>); <sup>13</sup>C{<sup>1</sup>H} NMR (151 MHz, CDCl<sub>3</sub>) δ 80.5 (q, <sup>2</sup>*J*<sub>C,F</sub> = 30.2 Hz, C-2), 80.6 (q, <sup>2</sup>*J*<sub>C,F</sub> = 30.2 Hz, C-2), 108.7, 108.9, 116.9, 117.0, 120.7, 121.15, 122.17, 122.19, 122.4, 122.6, 122.8, 123.2, 123.8 (q, <sup>1</sup>*J*<sub>C,F</sub> = 284.6 Hz, CF<sub>3</sub>), 123.9 (q, <sup>1</sup>*J*<sub>C,F</sub> = 284.9 Hz, CF<sub>3</sub>), 126.0, 126.4, 126.7 (2C), 126.9 (2C), 127.8 (2C), 128.0 (2C), 128.03 (2C), 128.3 (2C), 128.4 (2C), 128.5 (2C), 128.6 (2C), 128.86 (2C), 128.90 (2C), 128.93, 129.1 (2C), 129.2, 130.4, 130.5, 130.9, 131.0, 131.1, 131.3, 133.4, 133.7, 134.9, 135.1, 135.7, 136.8, 137.0, 137.4, 142.1, 142.5, 151.1, 151.3, 180.5, 182.5, 190.6, 192.2. HRMS (ESI) *m/z*: [M + H]<sup>+</sup> calcd for C<sub>33</sub>H<sub>24</sub>F<sub>3</sub>O<sub>3</sub> 525.1672, found 525.1679.

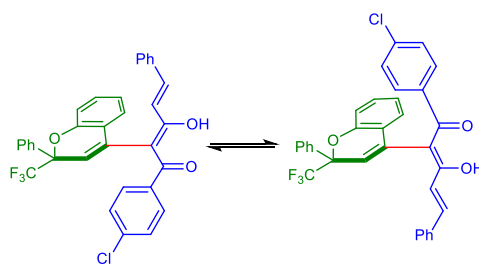

(2*Z*,4*E*)-1-(4-Chlorophenyl)-3-hydroxy-5-phenyl-2-(2-phenyl-2-(trifluoromethyl)-2*H*-chromen-4-yl)penta-2,4-dien-1-one (**8b**). Obtained according to the general procedure from **2a** (80 mg) and **3b** (71 mg). Yield 95 mg (68%), light-yellow powder, mp 192–193 °C. IR (ATR): 1625, 1597, 1575, 1482, 1449 cm<sup>-1</sup>; <sup>1</sup>H NMR (500 MHz, CDCl<sub>3</sub>) δ (a mixture of two rotamers in the ratio of ≈50:50) 5.98 (s, 1H), 6.28 (s, 1H), 6.44 (d, *J* = 15.7 Hz, 1H), 6.66 (d, *J* = 15.6 Hz, 1H), 6.80 (t, *J* = 7.5 Hz, 1H), 6.89–6.98 (m, 4H), 7.07–7.37 (m, 24H), 7.40 (t, *J* = 7.4 Hz, 1H), 7.56–7.63 (m, 4H), 7.76 (d, *J* = 15.6 Hz, 1H), 7.78 (d, *J* = 15.6 Hz, 1H), 17.52 (s, 1H), 17.62 (s, 1H); <sup>19</sup>F NMR (376 MHz, CDCl<sub>3</sub>) δ 82.55 (s, CF<sub>3</sub>), 82.79 (s, CF<sub>3</sub>); <sup>13</sup>C{<sup>1</sup>H} NMR (151 MHz, CDCl<sub>3</sub>) δ 80.5 (q, <sup>2</sup>*J*<sub>C,F</sub> = 30.1 Hz, C-2), 80.6 (q, <sup>2</sup>*J*<sub>C,F</sub> = 30.2 Hz, C-2), 108.6, 108.7, 117.11, 117.14, 120.4, 120.8, 121.9, 122.0, 122.6, 122.7, 123.0, 123.4, 123.8 (q, <sup>1</sup>*J*<sub>C,F</sub> = 284.5 Hz, 2CF<sub>3</sub>), 125.9, 126.2, 126.5 (2C), 126.8 (2C), 128.4 (2C), 128.49 (2C), 128.51 (2C), 128.54 (2C), 128.6 (2C), 128.9 (2C), 128.94 (2C), 129.11 (2C), 129.16, 129.18 (2C), 129.3, 129.5 (2C), 130.5, 130.6, 131.2, 131.3, 133.1, 133.5, 134.8, 135.0, 135.3, 135.5, 135.7, 136.6, 137.2, 137.6, 142.5, 142.9, 151.1, 151.3, 180.7, 182.5, 189.3, 190.5. Anal. Calcd for C<sub>33</sub>H<sub>22</sub>ClF<sub>3</sub>O<sub>3</sub>·1.5H<sub>2</sub>O: C, 67.64; H, 4.30. Found: C, 67.75; H, 4.01.

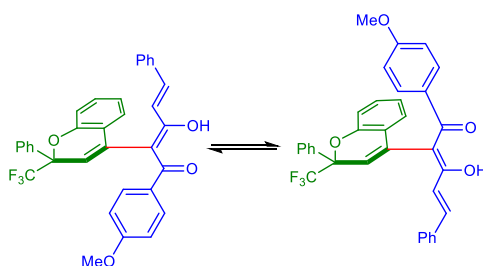

(2*Z*,4*E*)-3-Hydroxy-1-(4-methoxyphenyl)-5-phenyl-2-(2-phenyl-2-(trifluoromethyl)-2*H*-chromen-4-yl)penta-2,4-dien-1-one (**8c**). Obtained according to the general procedure from **2a** (80 mg) and **3c** (70 mg). Yield 96 mg (69%), yellow powder, mp 150–151 °C. IR (ATR): 1627, 1604, 1578, 1482, 1448 cm<sup>-1</sup>; <sup>1</sup>H NMR (500 MHz, CDCl<sub>3</sub>) δ (a mixture of two rotamers in the ratio of 50:50) 3.71 (s, 3H), 3.78 (s, 3H), 6.05 (s, 1H), 6.30 (s, 1H), 6.41–6.47 (m, 3H), 6.72 (d, *J* = 15.8 Hz, 1H), 6.76 (d, *J* = 8.8 Hz, 2H), 6.80 (t, *J* = 7.7 Hz, 1H), 6.90 (t, *J* = 7.7 Hz, 1H), 7.00 (dd, *J* = 7.7, 1.0 Hz, 1H), 7.05 (d, *J* = 7.7 Hz, 2H), 7.11 (d, *J* = 7.7 Hz, 1H), 7.14–7.45 (m, 22H), 7.62 (d, *J* = 7.7 Hz, 2H), 7.71 (d, *J* = 15.8 Hz, 1H), 7.73 (d, *J* = 8.8 Hz, 2H), 7.75 (d, *J* = 15.6 Hz, 1H), 17.87 (s, 1H), 17.90 (s, 1H); <sup>19</sup>F NMR (376 MHz, CDCl<sub>3</sub>) δ 82.53 (s, CF<sub>3</sub>), 82.85 (s, CF<sub>3</sub>); <sup>13</sup>C{<sup>1</sup>H} NMR (151 MHz, CDCl<sub>3</sub>) δ 55.3, 55.5, 80.63 (q, <sup>2</sup>*J*<sub>C,F</sub> = 30.4 Hz, C-2), 80.64 (q, <sup>2</sup>*J*<sub>C,F</sub> = 30.4 Hz, C-2), 108.2, 108.3, 113.4 (2C), 113.6 (2C), 117.0 (2C), 120.9, 121.2, 122.12, 122.13, 122.16, 122.7, 122.8, 123.0, 123.9 (q, <sup>1</sup>*J*<sub>C,F</sub> = 284.1 Hz, 2CF<sub>3</sub>), 126.1, 126.5, 126.8 (4C), 128.37 (2C), 128.42 (2C), 128.5 (2C), 128.8 (2C), 128.9, 128.9 (2C), 129.1 (2C), 129.2, 129.3, 129.7, 130.2 (3C), 130.3, 130.7 (2C), 131.0, 131.1, 133.8, 134.1, 135.0, 135.2, 135.7, 136.7, 141.6, 141.9, 151.2, 151.3, 161.9, 162.4, 180.2, 181.4, 190.1, 190.5. HRMS (ESI) *m/z*: [M + H]<sup>+</sup> calcd

for C<sub>34</sub>H<sub>26</sub>F<sub>3</sub>O<sub>4</sub> 555.1778, found 555.1776.

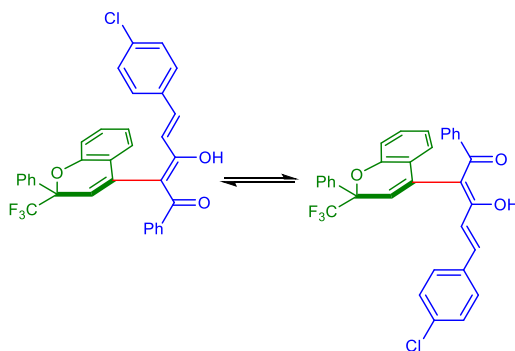

(2*Z*,4*E*)-5-(4-Chlorophenyl)-3-hydroxy-1-phenyl-2-(2-phenyl-2-(trifluoromethyl)-2*H*-chromen-4-yl)penta-2,4-dien-1-one (**8d**). Obtained according to the general procedure from **2a** (80 mg) and **3d** (71 mg). Yield 98 mg (70%), yellow powder, mp 153–154 °C. IR (ATR): 1626, 1605, 1569, 1491, 1452 cm<sup>-1</sup>; <sup>1</sup>H NMR (500 MHz, CDCl<sub>3</sub>) δ (a mixture of two rotamers in the ratio of ≈50:50) 6.00 (s, 1H), 6.25 (s, 1H), 6.39 (d, *J* = 15.6 Hz, 1H), 6.68 (d, *J* = 15.8 Hz, 1H), 6.80 (td, *J* = 7.6, 0.8 Hz, 1H), 6.90 (td, *J* = 7.6, 0.8 Hz, 1H), 6.96–7.02 (m, 5H), 7.08 (d, *J* = 8.0 Hz, 1H), 7.12–7.44 (m, 24H), 7.57–7.62 (m, 4H), 7.67 (d, *J* = 15.8 Hz, 1H), 7.70 (d, *J* = 15.8 Hz, 1H), 17.51 (s, 1H), 17.66 (s, 1H); <sup>19</sup>F NMR (376 MHz, CDCl<sub>3</sub>) δ 82.63 (s, 3F), 82.74 (s, 3F); <sup>13</sup>C{<sup>1</sup>H} NMR (151 MHz, CDCl<sub>3</sub>) δ 80.5 (q, <sup>2</sup>*J*<sub>C,F</sub> = 30.5 Hz, C-2), 80.6 (q, <sup>2</sup>*J*<sub>C,F</sub> = 30.7 Hz, c-2), 108.8, 109.0, 117.0 (2C), 121.2, 121.6, 122.0, 122.1, 122.4, 122.6, 122.8, 123.2, 123.7 (q, <sup>1</sup>*J*<sub>C,F</sub> *J* = 284.0 Hz, CF<sub>3</sub>), 123.9 (q, <sup>1</sup>*J*<sub>C,F</sub> = 284.8 Hz, CF<sub>3</sub>), 126.0, 126.3, 126.7 (2C), 126.8 (2C), 127.8 (2C), 128.0 (2C), 128.1 (2C), 128.3 (2C), 128.6 (2C), 128.9 (2C), 129.0, 129.1 (2C), 129.2, 129.4 (2C), 129.5 (2C), 129.6 (2C), 131.0, 131.1 (2C), 131.4, 133.4 (2C), 133.5, 133.6, 135.6, 136.2, 136.4, 136.8, 136.9, 137.3, 140.5, 140.9, 151.1, 151.3, 179.9, 181.9, 190.8, 192.3. HRMS (ESI) *m/z*: [M + H]<sup>+</sup> calcd for C<sub>33</sub>H<sub>23</sub>ClF<sub>3</sub>O<sub>3</sub> 559.1282, found 559.1280.

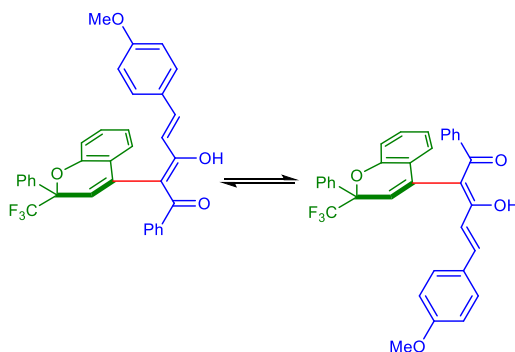

(2*Z*,4*E*)-3-Hydroxy-5-(4-methoxyphenyl)-1-phenyl-2-(2-phenyl-2-(trifluoromethyl)-2*H*-chromen-4-yl)penta-2,4-dien-1-one (**8e**). Obtained from **2a** (80 mg) and **3e** (70 mg) according to the general procedure. Yield 95 mg (69%), yellow powder, mp 177–178 °C. IR (ATR): 1622, 1602, 1570, 1510, 1481, 1454 cm<sup>-1</sup>; <sup>1</sup>H NMR (500 MHz, CDCl<sub>3</sub>) δ (a mixture of two rotamers in the ratio of 50:50) 3.82

(s, 6H), 5.99 (s, 1H), 6.24 (s, 1H), 6.31 (d,  $J = 15.6$  Hz, 1H), 6.58 (d,  $J = 15.6$  Hz, 1H), 6.74 (d,  $J = 8.5$  Hz, 2H), 6.79 (t,  $J = 7.5$  Hz, 1H), 6.85 (d,  $J = 8.5$  Hz, 2H), 6.90 (t,  $J = 7.5$  Hz, 1H), 6.96–7.08 (m, 6H), 7.11–7.42 (m, 20H), 7.59 (d,  $J = 8.2$  Hz, 2H), 7.61 (d,  $J = 8.2$  Hz, 2H), 7.72 (d,  $J = 15.6$  Hz, 1H), 7.75 (d,  $J = 15.6$  Hz, 1H) 17.69 (s, 1H), 17.83 (s, 1H);  $^{19}\text{F}$  NMR (376 MHz,  $\text{CDCl}_3$ )  $\delta$  82.63 (s,  $\text{CF}_3$ ), 82.75 (s,  $\text{CF}_3$ );  $^{13}\text{C}\{^1\text{H}\}$  NMR (151 MHz,  $\text{CDCl}_3$ )  $\delta$  55.5 (2C), 80.5 (q,  $^2J_{\text{C,F}} = 30.1$  Hz, C-2), 80.6 (q,  $^2J_{\text{C,F}} = 30.2$  Hz, C-2), 108.36, 108.43, 114.3 (2C), 114.6 (2C), 116.9 (2C), 118.3, 118.7, 122.2, 122.3 (2C), 122.6, 122.8, 123.1, 123.8 (q,  $^1J_{\text{C,F}} = 284.8$  Hz,  $\text{CF}_3$ ), 123.9 (q,  $^2J_{\text{C,F}} = 285.2$  Hz,  $\text{CF}_3$ ), 126.1, 126.4, 126.7 (2C), 126.9 (2C), 127.7, 127.8 (2C), 127.9, 127.94 (2C), 128.0 (2C), 128.3 (2C), 128.5 (2C), 128.87 (2C), 128.9, 129.1, 130.2 (2C), 130.3 (2C), 130.8, 130.9, 131.0, 131.1, 133.6, 133.8, 135.7, 136.8, 137.0, 137.4, 142.0, 142.5, 151.1, 151.3, 161.6, 161.7, 181.4, 183.3, 189.6, 191.2. HRMS (ESI)  $m/z$ :  $[\text{M} + \text{H}]^+$  calcd for  $\text{C}_{34}\text{H}_{26}\text{F}_3\text{O}_4$  555.1778, found 555.1784.

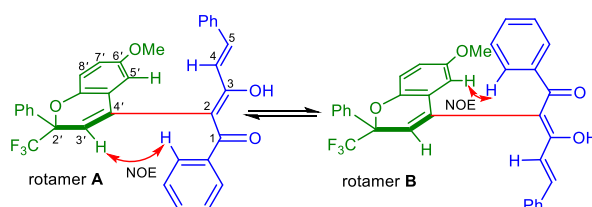

(*2Z,4E*)-3-Hydroxy-2-(6-methoxy-2-phenyl-2-(trifluoromethyl)-2H-chromen-4-yl)-1,5-diphenyl-penta-2,4-dien-1-one (**8f**). Obtained from **2b** (88 mg) and **3a** (63 mg) according to the general procedure. Yield 102 mg (74%), yellow powder, mp 149–150 °C. IR (ATR): 1630, 1578, 1484, 1451  $\text{cm}^{-1}$ ;  $^1\text{H}$  NMR (500 MHz,  $\text{CDCl}_3$ )  $\delta$  (a mixture of two rotamers **A** and **B** in the ratio of 53:47)  $\delta$  rotamer **A** (53%) 3.60 (s, 3H, OMe), 6.29 (s, 1H, H-3'), 6.45 (d,  $J = 15.6$  Hz, 1H, H-5), 6.50 (d,  $J = 2.8$  Hz, 1H, H-5'), 6.71 (dd,  $J = 8.9, 2.8$  Hz, 1H, H-7'), 7.00 (d,  $J = 8.9$  Hz, 1H, H-8'), 7.11 (d,  $J = 7.7$  Hz, 2H,  $\text{H}_o$  Ph-5), 7.19 (t,  $J = 7.7$  Hz, 2H,  $\text{H}_m$  Ph-5), 7.26 (t,  $J = 7.7$  Hz, 2H,  $\text{H}_m$  Ph-2'), 7.28 (t,  $J = 7.7$  Hz, 1H,  $\text{H}_p$  Ph-5), 7.32 (t,  $J = 7.7$  Hz, 1H,  $\text{H}_p$  Ph-2'), 7.34 (t,  $J = 7.7$  Hz, 2H,  $\text{H}_m$  Bz), 7.38 (t,  $J = 7.7$  Hz, 1H,  $\text{H}_p$  Bz), 7.59 (d,  $J = 7.7$  Hz, 2H,  $\text{H}_o$  Ph-2'), 7.61 (d,  $J = 7.7$  Hz, 2H,  $\text{H}_o$  Bz), 7.76 (d,  $J = 15.6$  Hz, 1H, H-4), 17.59 (s, 1H, OH); rotamer **B** (47%) 3.64 (s, 3H, OMe), 6.04 (s, 1H, H-3'), 6.68 (d,  $J = 2.8$  Hz, 1H, H-5'), 6.73 (d,  $J = 15.8$  Hz, 1H, H-5), 6.79 (dd,  $J = 8.9, 2.8$  Hz, 1H, H-7'), 7.01 (t,  $J = 7.7$  Hz, 2H,  $\text{H}_m$  Ar), 7.08 (d,  $J = 8.9$  Hz, 1H, H-8'), 7.13 (d,  $J = 7.7$  Hz, 2H,  $\text{H}_o$  Ph-2'), 7.24 (t,  $J = 7.7$  Hz, 2H,  $\text{H}_m$  Bz), 7.25 (t,  $J = 7.7$  Hz, 2H,  $\text{H}_m$  Ph-2'), 7.29 (t,  $J = 7.7$  Hz, 1H,  $\text{H}_p$  Ph-2'), 7.34 (t,  $J = 7.7$  Hz, 1H,  $\text{H}_p$  Bz), 7.35 (t,  $J = 7.7$  Hz, 1H,  $\text{H}_p$  Ph-5), 7.39 (d,  $J = 7.7$  Hz, 2H,  $\text{H}_o$  Ph-5), 7.40 (d,  $J = 7.7$  Hz, 2H,  $\text{H}_o$  Bz), 7.78 (d,  $J = 15.6$  Hz, 1H, H-4), 17.76 (s, 1H, OH).  $^{19}\text{F}$  NMR (376 MHz,  $\text{CDCl}_3$ )  $\delta$  82.66 (s,  $\text{CF}_3$ ), 82.77 (s,  $\text{CF}_3$ );  $^{13}\text{C}\{^1\text{H}\}$  NMR (151 MHz,  $\text{CDCl}_3$ )  $\delta$  29.8, 55.8, 80.4 (q,  $^2J_{\text{C,F}} = 30.3$  Hz, C-2), 80.5 (q,  $^2J_{\text{C,F}} = 30.0$  Hz, C-2), 108.7, 108.8, 111.0, 111.2, 116.1, 116.3, 117.7, 117.8, 120.7, 121.0, 122.95, 123.02, 123.20, 123.8 (q,  $^1J_{\text{C,F}} = 284.5$  Hz,  $\text{CF}_3$ ), 123.9 (q,  $^1J_{\text{C,F}} = 286.5$  Hz,  $\text{CF}_3$ ), 124.0, 126.9 (2C), 127.0 (2C), 127.8 (2C), 128.0 (2C), 128.1 (2C), 128.4 (2C), 128.49 (2C), 128.50 (2C), 128.54 (2C), 128.86 (4C), 128.92, 129.1 (2C), 129.2,

130.4, 130.5, 131.0, 131.3, 133.5, 133.7, 134.9, 135.1, 135.5, 136.6, 136.9, 137.4, 142.2, 142.6, 144.9, 145.1, 154.8, 155.0, 180.5, 182.7, 190.4, 192.1. HRMS (ESI)  $m/z$ :  $[M + H]^+$  calcd for  $C_{34}H_{26}F_3O_4$  555.1778, found 555.1783.

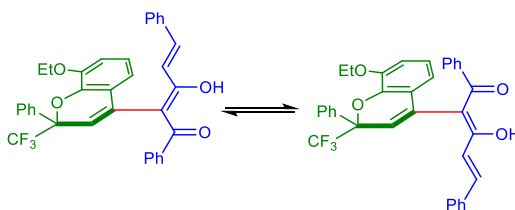

(2*Z*,4*E*)-2-(8-Ethoxy-2-phenyl-2-(trifluoromethyl)-2*H*-chromen-4-yl)-3-hydroxy-1,5-diphenylpenta-2,4-dien-1-one (**8g**). Obtained according to the general procedure from **2c** (91 mg) and **3a** (63 mg). Yield 103 mg (72%), yellow powder, mp 158–159 °C. IR (ATR): 1622, 1598, 1578, 1485, 1449  $cm^{-1}$ ;  $^1H$  NMR (500 MHz,  $CDCl_3$ )  $\delta$  (a mixture of two rotamers in the ratio of 50:50) 1.50–1.54 (m, 3H), 1.54–1.58 (m, 3H), 4.07–4.28 (m, 4H), 6.05 (s, 1H), 6.32 (s, 1H), 6.44 (d,  $J = 15.5$  Hz, 1H), 6.60 (d,  $J = 8.3$  Hz, 1H), 6.71 (d,  $J = 15.7$  Hz, 1H), 6.68–6.74 (m, 1H), 6.80 (d,  $J = 7.6$  Hz, 2H), 6.81–6.85 (m, 1H), 6.89 (dd,  $J = 7.9, 1.2$  Hz, 1H), 6.99 (t,  $J = 7.7$  Hz, 2H), 7.10 (d,  $J = 7.5$  Hz, 2H), 7.16 (d,  $J = 4.3$  Hz, 3H), 7.21–7.41 (m, 19H), 7.61 (d,  $J = 7.5$  Hz, 2H), 7.67 (d,  $J = 7.8$  Hz, 2H), 7.74 (d,  $J = 15.9$  Hz), 7.77 (d,  $J = 15.4$  Hz, 1H), 17.56 (s, 1H), 17.76 (s, 1H);  $^{19}F$  NMR (376 MHz,  $CDCl_3$ )  $\delta$  82.70 (s,  $CF_3$ ), 82.87 (s,  $CF_3$ );  $^{13}C\{^1H\}$  NMR (151 MHz,  $CDCl_3$ )  $\delta$  15.1, 15.2, 65.16, 65.23, 80.67 (q,  $^2J_{C,F} = 30.3$  Hz), 80.77 (q,  $^2J_{C,F} = 30.2$  Hz), 109.0, 109.2, 115.7, 115.9, 118.0, 118.3, 120.8, 121.2, 122.3, 122.5, 122.8, 122.9, 123.70, 123.72, 123.80 (q,  $^1J_{C,F} = 284.9$  Hz), 123.83, 123.83 (q,  $^1J_{C,F} = 282.4$  Hz), 124.7, 126.8 (2C), 126.9 (2C), 127.9 (2C), 128.0 (4C), 128.4 (3C), 128.5 (4C), 128.79 (2C), 128.83 (2C), 128.9, 129.1 (2C), 129.2, 130.3, 130.5, 130.9, 131.2, 133.6, 133.9, 134.9, 135.1, 135.2, 136.4, 136.9, 137.4, 140.6, 142.0, 142.5, 147.7, 147.9, 180.4, 182.8, 190.3, 192.2. HRMS (ESI)  $m/z$ :  $[M + H]^+$  calcd for  $C_{35}H_{28}F_3O_4$  569.1934, found 569.1935.

**Procedure for the reduction of compound 5aa.** To a stirred solution of compound **5aa** (99.1 mg, 0.20 mmol) in 2 ml of dry THF,  $NaBH_4$  (30.3 mg, 0.80 mmol) was added. The resulting solution was stirred at room temperature for 10 h (TLC control,  $CH_2Cl_2$ –hexane, 2:1), then it was quenched with 5 ml of  $H_2O$  and neutralized with 1M HCl. Organic phase was extracted with EtOAc, dried over  $Na_2SO_4$  and evaporated under reduced pressure to complete dryness. Residue was subjected to column chromatography (EtOAc–hexane, 1:3) to obtain reduction products **9** and **10** as white powders after recrystallisation from hexane.



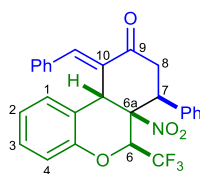

(6*S*\*,6*aR*\*,7*S*\*,10*aR*\*)-10-((*E*)-Benzylidene)-6*a*-nitro-7-phenyl-6-(trifluoromethyl)-6,6*a*,7,8,10,10*a*-hexahydro-9*H*-benzo[*c*]chromen-9-one (**9**). Yield 21 mg (22%), white powder, mp 218–219 °C. IR (ATR): 1698, 1584, 1548, 1484, 1454, 1377, 1263, 1213 cm<sup>-1</sup>; <sup>1</sup>H NMR (500 MHz, CDCl<sub>3</sub>) δ 2.73 (dd, *J* = 17.4, 4.6 Hz, 1H), 2.97 (dd, *J* = 17.4, 14.4 Hz, 1H), 3.92 (dd, *J* = 14.4, 4.6 Hz, 1H), 5.04 (q, <sup>3</sup>*J*<sub>H,F</sub> = 7.1 Hz, 1H), 5.38 (s, 1H), 7.07 (t, *J* = 7.6 Hz, 1H), 7.19 (d, *J* = 8.2 Hz, 1H), 7.21–7.25 (m, 2H), 7.29 (d, *J* = 8.0 Hz, 1H), 7.37 (t, *J* = 7.7 Hz, 1H), 7.39–7.45 (m, 6H), 7.51–7.56 (m, 2H), 7.93 (s, 1H); <sup>19</sup>F NMR (471 MHz, CDCl<sub>3</sub>) δ 92.09 (d, *J* = 7.1 Hz, CF<sub>3</sub>); <sup>13</sup>C{<sup>1</sup>H} NMR (151 MHz, CDCl<sub>3</sub>) δ 39.5, 41.0, 42.8, 73.8 (q, <sup>2</sup>*J*<sub>C,F</sub> = 30.9 Hz, C-6), 86.4, 117.3, 118.8, 123.5, 123.5 (q, <sup>1</sup>*J*<sub>C,F</sub> = 288.0 Hz, CF<sub>3</sub>), 128.9 (2C), 129.2 (2C), 129.3 (2C), 129.4, 129.6, 129.7 (2C), 130.1, 130.4, 133.5, 134.1, 134.3, 140.2, 150.2, 196.6. HRMS (ESI) *m/z*: [M + H]<sup>+</sup> calcd for C<sub>27</sub>H<sub>21</sub>F<sub>3</sub>NO<sub>4</sub> 480.1423, found 480.1411.

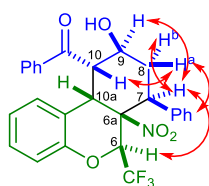

((6*S*\*,6*aR*\*,7*S*\*,9*S*\*,10*aS*\*)-9-Hydroxy-6*a*-nitro-7-phenyl-6-(trifluoromethyl)-6*a*,7,8,9,10,10*a*-hexahydro-6*H*-benzo[*c*]chromen-10-yl)(phenyl)methanone (**10**). Yield 38 mg (38%), white powder, mp 167–168 °C. IR (ATR): 3548, 1670, 1582, 1553, 1489, 1452, 1379, 1273, 1218 cm<sup>-1</sup>; <sup>1</sup>H NMR (500 MHz, CDCl<sub>3</sub>) δ 2.17 (td, *J* = 13.7, 11.1 Hz, 1H, H<sup>a</sup>-8), 2.27 (dt, *J* = 13.7, 3.2 Hz, 1H, H<sup>b</sup>-8), 3.56 (dd, *J* = 13.7, 3.2 Hz, 1H, H-7), 3.69 (s, 1H, OH), 4.31 (td, *J* = 10.5, 3.2 Hz, 1H, H-9), 4.69 (dd, *J* = 10.0, 3.7 Hz, 1H, H-10), 4.79 (d, *J* = 3.7 Hz, 1H, H-10*a*), 5.01 (q, <sup>3</sup>*J*<sub>H,F</sub> = 7.2 Hz, 1H, H-6), 6.97 (t, *J* = 7.7 Hz, 1H, H-2), 7.08 (d, *J* = 7.8 Hz, 1H, H-4), 7.22–7.27 (m, 2H, H-1,3), 7.29–7.34 (m, 2H, H<sub>o</sub> Ph), 7.39–7.44 (m, 3H, H<sub>m</sub>, H<sub>p</sub> Ph), 7.59 (t, *J* = 7.6 Hz, 2H, H<sub>m</sub> Bz), 7.66 (t, *J* = 7.6 Hz, 1H, H<sub>p</sub> Bz), 8.29 (d, *J* = 7.6 Hz, 2H, H<sub>o</sub> Bz); <sup>19</sup>F NMR (471 MHz, CDCl<sub>3</sub>) δ 91.72 (d, *J* = 7.3 Hz, CF<sub>3</sub>); <sup>13</sup>C{<sup>1</sup>H} NMR (126 MHz, CDCl<sub>3</sub>) δ 34.9, 39.6, 43.8, 53.1, 65.4, 74.1 (q, <sup>2</sup>*J*<sub>C,F</sub> = 31.0 Hz, C-6), 87.7, 117.9, 119.7, 123.3 (q, <sup>1</sup>*J*<sub>C,F</sub> = 288.1 Hz, CF<sub>3</sub>), 123.4, 127.4, 128.7 (2C), 128.7 (2C), 128.8, 129.5 (2C), 129.5 (2C), 129.7, 134.3, 136.2, 136.8, 150.1, 205.8. HRMS (ESI) *m/z*: [M + H]<sup>+</sup> calcd for C<sub>27</sub>H<sub>23</sub>F<sub>3</sub>NO<sub>5</sub> 498.1528, found 498.1516.

**General procedure for the synthesis of pyrazoles 11.** To a stirred solution of hexahydro-9*H*-benzo[*c*]chromen-9-one **5** (0.10 mmol) in 1 ml of glacial acetic acid, a solution of hydrazine hydrate (1.0 mmol) in 0.5 mL of AcOH was added. Then, the mixture was stirred at reflux for 4 h (TLC control

CH<sub>2</sub>Cl<sub>2</sub>-hexane (2:1)). After completion of the reaction, it was cooled down and poured into vigorously stirred water. The formed precipitate was filtered off, washed with water, dried, and then recrystallized from MeOH with addition of NaHCO<sub>3</sub>. Precipitate was again washed with water and dried under reduced pressure to obtain products **11**.

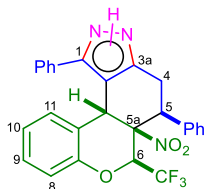

(5*S*\*,5*aR*\*,6*S*\*,11*bS*\*)-5*a*-Nitro-1,5-diphenyl-6-(trifluoromethyl)-2(3),4,5,5*a*,6,11*b*-hexahydrochromeno[4,3-*e*]indazole (**11a**). Obtained according to the general procedure from **5aa** (49.5 mg). Yield 40.1 mg (75%), white powder, mp 162–163 °C. IR (ATR): 3401, 1585, 1552, 1487, 1454, 1373, 1354, 1270, 1211 cm<sup>-1</sup>; <sup>1</sup>H NMR (500 MHz, CDCl<sub>3</sub>) δ 3.02 (dd, *J* = 16.9, 5.2 Hz, 1H), 3.21 (dd, *J* = 16.9, 13.2 Hz, 1H), 3.74 (dd, *J* = 13.2, 5.2 Hz, 1H), 4.88 (q, <sup>3</sup>*J*<sub>H,F</sub> = 7.3 Hz, 1H), 5.39 (s, 1H), 6.80 (t, *J* = 7.8 Hz, 1H), 6.95 (d, *J* = 7.8 Hz, 1H), 7.09 (d, *J* = 8.2 Hz, 1H), 7.20 (t, *J* = 7.8 Hz, 1H), 7.39–7.47 (m, 6H), 7.53 (t, *J* = 7.6 Hz, 2H), 7.77 (d, *J* = 7.6 Hz, 2H), 10.30 (br. s, 1H); <sup>19</sup>F NMR (471 MHz, CDCl<sub>3</sub>) δ 90.97 (d, *J* = 7.3 Hz, CF<sub>3</sub>); <sup>13</sup>C{<sup>1</sup>H} NMR (126 MHz, CDCl<sub>3</sub>) δ 25.8, 34.8 (br. s, C-5*a*), 43.9, 74.0 (q, <sup>2</sup>*J*<sub>C,F</sub> = 30.9 Hz, C-6), 86.7, 96.3, 112.6, 116.7, 122.3, 123.0, 123.5 (q, <sup>1</sup>*J*<sub>C,F</sub> = 285.5 Hz, CF<sub>3</sub>), 127.1 (2C), 127.8, 128.6 (2C), 129.0, 129.1, 129.2, 129.8 (2C), 129.9, 130.5 (2C), 131.5, 135.6, 148.9. HRMS (ESI) *m/z*: [M + H]<sup>+</sup> calcd for C<sub>27</sub>H<sub>21</sub>F<sub>3</sub>N<sub>3</sub>O<sub>3</sub> 492.1530, found 492.1531.

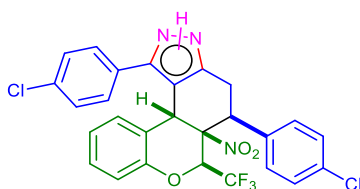

(5*S*\*,5*aR*\*,6*S*\*,11*bS*\*)-1,5-Bis(4-chlorophenyl)-5*a*-nitro-6-(trifluoromethyl)-2(3),4,5,5*a*,6,11*b*-hexahydrochromeno[4,3-*e*]indazole (**11b**). Obtained according to the general procedure from **5am** (56.4 mg). Yield 51.7 mg (92%), white powder, mp 314–315 °C. IR (ATR): 3412, 1585, 1549, 1487, 1454, 1370, 1354, 1280, 1267, 1210 cm<sup>-1</sup>; <sup>1</sup>H NMR (500 MHz, CDCl<sub>3</sub>) δ 2.96 (dd, *J* = 16.9, 5.2 Hz, 1H), 3.13 (dd, *J* = 16.9, 13.1 Hz, 1H), 3.71 (dd, *J* = 13.1, 5.2 Hz, 1H), 4.82 (q, <sup>3</sup>*J*<sub>H,F</sub> = 7.2 Hz, 1H), 5.33 (s, 1H), 6.83 (t, *J* = 7.9 Hz, 1H), 6.88 (d, *J* = 7.8 Hz, 1H), 7.09 (d, *J* = 8.1 Hz, 1H), 7.22 (t, *J* = 7.8 Hz, 1H), 7.33 (d, *J* = 8.4 Hz, 2H), 7.42 (d, *J* = 8.2 Hz, 2H), 7.48 (d, *J* = 8.4 Hz, 2H), 7.71 (d, *J* = 8.2 Hz, 2H), 10.58 (br. s, 1H); <sup>19</sup>F NMR (471 MHz, CDCl<sub>3</sub>) δ 90.86 (d, *J* = 7.2 Hz, CF<sub>3</sub>); <sup>13</sup>C{<sup>1</sup>H} NMR (126 MHz, CDCl<sub>3</sub>) δ 25.5, 34.7 (br. s, C-5*a*), 43.2, 73.9 (d, <sup>2</sup>*J*<sub>C,F</sub> = 31.1 Hz, C-6), 86.5, 112.7, 116.9, 122.0, 123.2, 123.3 (q, <sup>1</sup>*J*<sub>C,F</sub> = 287.6 Hz, CF<sub>3</sub>), 128.5 (2C), 128.9 (2C), 129.2, 129.5, 129.6, 130.0 (3C), 130.2, 131.7 (2C), 133.8,

135.2, 135.3, 148.7. HRMS (ESI)  $m/z$ :  $[M + H]^+$  calcd for  $C_{27}H_{19}Cl_2F_3N_3O_3$  560.0756, found 560.0738.

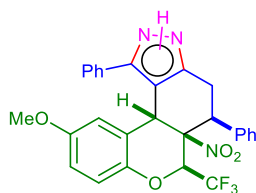

(5*S*\*,5*aR*\*,6*S*\*,11*bS*\*)-10-Methoxy-5*a*-nitro-1,5-diphenyl-6-(trifluoromethyl)-2(3),4,5,5*a*,6,11*b*-hexahydrochromeno[4,3-*e*]indazole (**11c**). Obtained according to the general procedure from **5ia** (52.5 mg). Yield 44.1 mg (86%), white powder, mp 169–170 °C. IR (ATR): 3065, 1552, 1494, 1454, 1355, 1271, 1201  $cm^{-1}$ ;  $^1H$  NMR (500 MHz,  $CDCl_3$ )  $\delta$  3.02 (dd,  $J = 16.9, 5.1$  Hz, 1H), 3.21 (dd,  $J = 16.9, 13.3$  Hz, 1H), 3.26 (s, 3H), 3.76 (dd,  $J = 13.3, 5.1$  Hz, 1H), 4.83 (q,  $^3J_{H,F} = 7.4$  Hz, 1H), 5.42 (s, 1H), 6.43 (d,  $J = 2.6$  Hz, 1H), 6.73 (dd,  $J = 8.9, 2.6$  Hz, 1H), 6.98 (d,  $J = 8.9$  Hz, 1H), 7.39–7.47 (m, 6H), 7.53 (t,  $J = 7.6$  Hz, 2H), 7.78 (d,  $J = 7.6$  Hz, 2H) (NH signal was not observed);  $^{19}F$  NMR (471 MHz,  $CDCl_3$ )  $\delta$  91.17 (d,  $J = 7.4$  Hz,  $CF_3$ );  $^{13}C\{^1H\}$  NMR (126 MHz,  $CDCl_3$ )  $\delta$  25.6, 35.0 (br. s, C-5*a*), 44.1, 55.4, 74.0 (q,  $^1J_{C,F} = 31.1$  Hz, C-6), 86.9, 112.7, 112.8, 116.7, 117.7, 122.6, 123.5 (q,  $^1J_{C,F} = 287.9$  Hz,  $CF_3$ ), 127.4 (2C), 128.6 (2C), 129.0, 129.1, 129.8 (2C), 130.5 (2C), 132.0, 135.7, 142.4, 155.1 (2C were not observed). HRMS (ESI)  $m/z$ :  $[M + H]^+$  calcd for  $C_{28}H_{23}F_3N_3O_4$  522.1641, found 522.1619.

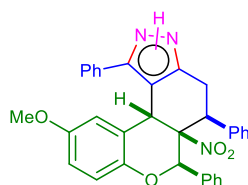

(5*S*\*,5*aR*\*,6*R*\*,11*bS*\*)-10-Methoxy-5*a*-nitro-1,5,6-triphenyl-2(3),4,5,5*a*,6,11*b*-hexahydrochromeno[4,3-*e*]indazole (**11d**). Obtained according to the general procedure from **5ma** (53.9 mg). Yield 39.7 mg (75%), white powder, mp 266–267 °C. IR (ATR): 3415, 1605, 1536, 1492, 1454, 1359, 1276, 1210  $cm^{-1}$ ;  $^1H$  NMR (500 MHz,  $CDCl_3$ )  $\delta$  3.05 (dd,  $J = 16.7, 4.6$  Hz, 1H), 3.31 (dd,  $J = 16.7, 13.2$  Hz, 1H), 3.34 (s, 3H), 3.79 (dd,  $J = 13.2, 4.6$  Hz, 1H), 5.19 (s, 1H), 5.38 (s, 1H), 6.45 (s, 1H), 6.79 (dd,  $J = 8.7, 1.6$  Hz, 1H), 6.95–7.03 (m, 3H), 7.22 (t,  $J = 7.5$  Hz, 2H), 7.30 (t,  $J = 7.5$  Hz, 1H), 7.36–7.48 (m, 6H), 7.58 (d,  $J = 7.5$  Hz, 2H), 7.66 (d,  $J = 7.5$  Hz, 2H), 10.18 (br. s, 1H);  $^{13}C\{^1H\}$  NMR (126 MHz,  $CDCl_3$ )  $\delta$  26.0, 34.2, 44.1, 55.4, 78.4, 92.5, 112.9, 113.0, 116.6, 117.4, 123.1, 127.0 (2C), 127.1, 127.2 (2C), 128.3 (2C), 128.4, 128.7 (2C), 128.8, 129.3, 129.5 (2C), 130.8, 130.9, 136.2, 137.0, 144.8, 154.3 (2C were not observed). HRMS (ESI)  $m/z$ :  $[M + H]^+$  calcd for  $C_{33}H_{28}N_3O_4$  530.2074, found 530.2076.

**General procedure for the synthesis of pyrazoles 12.** A mixture of the corresponding arylhydrazine hydrochloride (0.40 mmol) and hexahydro-9*H*-benzo[*c*]chromen-9-one **5** (0.10 mmol) in the 1.5 mL of EtOH–AcOH (2:1) mixture was stirred under reflux for 12 h (TLC control). After completion of the

reaction, it was cooled down and poured into a vigorously stirred H<sub>2</sub>O-saturated aqueous NaHCO<sub>3</sub> mixture, 2:1. The formed precipitate was filtered off, washed with water, dried, and then recrystallized from MeOH. Precipitate was again washed with water and dried under reduced pressure to obtain products **12**.

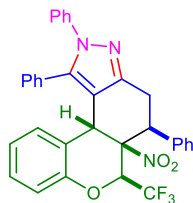

(5*S*\*,5*aR*\*,6*S*\*,11*bS*\*)-5*a*-Nitro-1,2,5-triphenyl-6-(trifluoromethyl)-2,4,5,5*a*,6,11*b*-hexahydrochromeno[4,3-*e*]indazole (**12a**). Obtained according to the general procedure from **5aa** (49.5 mg) and phenylhydrazine hydrochloride (57.8 mg). Yield 40.1 mg (71%), white powder, mp 270–271 °C. IR (ATR): 1598, 1587, 1549, 1486, 1454, 1366, 1354, 1276, 1221 cm<sup>-1</sup>; <sup>1</sup>H NMR (500 MHz, CDCl<sub>3</sub>) δ 3.15 (dd, *J* = 17.1, 5.2 Hz, 1H), 3.29 (dd, *J* = 17.1, 13.1 Hz, 1H), 3.80 (dd, *J* = 13.1, 5.2 Hz, 1H), 4.88 (q, <sup>3</sup>*J*<sub>H,F</sub> = 7.5 Hz, 1H), 5.26 (s, 1H), 6.78 (t, *J* = 7.7 Hz, 1H), 6.89 (d, *J* = 7.7 Hz, 1H), 7.06 (d, *J* = 7.7 Hz, 1H), 7.18 (t, *J* = 7.7 Hz, 1H), 7.24 (d, *J* = 7.7 Hz, 2H), 7.27–7.33 (m, 3H), 7.40–7.50 (m, 10H); <sup>19</sup>F NMR (471 MHz, CDCl<sub>3</sub>) δ 90.91 (d, *J* = 7.5 Hz, CF<sub>3</sub>); <sup>13</sup>C{<sup>1</sup>H} NMR (126 MHz, CDCl<sub>3</sub>) δ 26.5, 34.5 (br. s, C-5*a*), 44.4, 74.0 (q, <sup>2</sup>*J*<sub>C,F</sub> = 30.8 Hz, C-6), 86.6, 115.3, 116.7, 122.4, 122.8, 123.4 (q, <sup>1</sup>*J*<sub>C,F</sub> = 287.5 Hz, CF<sub>3</sub>), 125.4 (2C), 127.5, 128.6 (2C), 128.9 (2C), 129.0, 129.1, 129.2, 129.6 (3C), 129.7 (2C), 130.5 (2C), 130.6, 135.9, 140.0, 141.1, 146.3, 148.9. HRMS (ESI) *m/z*: [M + H]<sup>+</sup> calcd for C<sub>33</sub>H<sub>25</sub>F<sub>3</sub>O<sub>3</sub> 568.1843, found 568.1852.

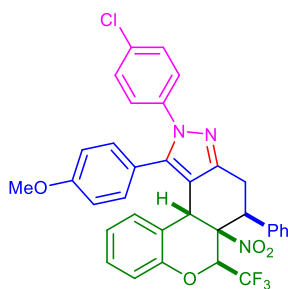

(5*S*\*,5*aR*\*,6*S*\*,11*bS*\*)-2-(4-Chlorophenyl)-1-(4-methoxyphenyl)-5*a*-nitro-5-phenyl-6-(trifluoromethyl)-2,4,5,5*a*,6,11*b*-hexahydrochromeno[4,3-*e*]indazole (**12b**). Obtained according to the general procedure from **5ac** (52.5 mg) and *p*-chlorophenylhydrazine hydrochloride (71.6 mg). Yield 47.9 mg (76%), white powder, mp 238–239 °C. IR (ATR): 1617, 1586, 1552, 1497, 1453, 1370, 1354, 1255, 1221 cm<sup>-1</sup>; <sup>1</sup>H NMR (500 MHz, CDCl<sub>3</sub>) δ 3.12 (dd, *J* = 17.1, 5.4 Hz, 1H), 3.26 (dd, *J* = 17.1, 13.1 Hz, 1H), 3.78 (dd, *J* = 13.1, 5.4 Hz, 1H), 3.85 (s, 3H), 4.87 (q, <sup>3</sup>*J*<sub>H,F</sub> = 7.3 Hz, 1H), 5.21 (s, 1H), 6.80 (t, *J* = 7.7 Hz, 1H), 6.91 (d, *J* = 7.7 Hz, 1H), 6.99 (d, *J* = 8.6 Hz, 2H), 7.07 (d, *J* = 8.1 Hz, 1H), 7.16–6.21 (m,

3H), 7.29 (d,  $J = 8.7$  Hz, 2H), 7.37 (d,  $J = 8.6$  Hz, 2H), 7.44 (s, 5H);  $^{19}\text{F}$  NMR (471 MHz,  $\text{CDCl}_3$ )  $\delta$  90.91 (d,  $J = 7.3$  Hz,  $\text{CF}_3$ );  $^{13}\text{C}\{^1\text{H}\}$  NMR (126 MHz,  $\text{CDCl}_3$ )  $\delta$  26.5, 34.5 (br. s, C-5a), 44.4, 55.4, 74.0 (q,  $^2J_{\text{C,F}} = 31.2$  Hz, C-6), 86.6, 115.3 (2C), 115.5, 116.7, 122.3, 122.4, 122.9, 123.4 (q,  $^1J_{\text{C,F}} = 287.4$  Hz,  $\text{CF}_3$ ), 126.4 (2C), 128.6 (2C), 129.0, 129.1 (2C), 129.2, 129.6, 130.5 (2C), 130.9 (2C), 133.1, 135.8, 138.6, 141.1, 146.5, 148.9, 160.3. HRMS (ESI)  $m/z$ :  $[\text{M} + \text{H}]^+$  calcd for  $\text{C}_{34}\text{H}_{26}\text{ClF}_3\text{N}_3\text{O}_4$  632.1558, found 632.1556.

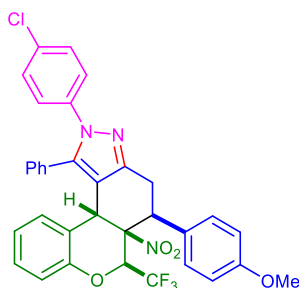

( $5S^*$ , $5aR^*$ , $6S^*$ , $11bS^*$ )-2-(4-Chlorophenyl)-5-(4-methoxyphenyl)-5a-nitro-1-phenyl-6-(trifluoromethyl)-2,4,5,5a,6,11b-hexahydrochromeno[4,3-e]indazole (**12c**). Obtained according to the general procedure from **5ah** (52.5 mg) and *p*-chlorophenylhydrazine hydrochloride (71.6 mg). Yield 48.4 mg (77%), white powder, mp 218–219 °C. IR (ATR): 1610, 1585, 1552, 1494, 1454, 1371, 1260, 1216  $\text{cm}^{-1}$ ;  $^1\text{H}$  NMR (500 MHz,  $\text{CDCl}_3$ )  $\delta$  3.11 (dd,  $J = 17.2, 5.3$  Hz, 1H), 3.22 (dd,  $J = 17.2, 13.2$  Hz, 1H), 3.75 (dd,  $J = 13.2, 5.3$  Hz, 1H), 3.87 (s, 3H), 4.89 (q,  $^3J_{\text{H,F}} = 7.3$  Hz, 1H), 5.22 (s, 1H), 6.78 (t,  $J = 7.6$  Hz, 1H), 6.86 (d,  $J = 7.6$  Hz, 1H), 6.97 (d,  $J = 8.2$  Hz, 2H), 7.05 (d,  $J = 8.2$  Hz, 1H), 7.14–7.20 (m, 3H), 7.28 (d,  $J = 8.7$  Hz, 2H), 7.36 (d,  $J = 8.2$  Hz, 2H), 7.43–7.50 (m, 5H);  $^{19}\text{F}$  NMR (471 MHz,  $\text{CDCl}_3$ )  $\delta$  90.89 (d,  $J = 7.3$  Hz,  $\text{CF}_3$ );  $^{13}\text{C}\{^1\text{H}\}$  NMR (126 MHz,  $\text{CDCl}_3$ )  $\delta$  26.7, 34.5 (br. s, C-5a), 43.8, 55.5, 74.1 (q,  $^2J_{\text{C,F}} = 30.8$  Hz, C-6), 86.7, 114.0 (2C), 115.8, 116.7, 122.4, 122.8, 123.5 (q,  $^1J_{\text{C,F}} = 287.2$  Hz,  $\text{CF}_3$ ), 126.4 (2C), 127.6, 129.1 (2C), 129.2, 129.4, 129.5, 129.7 (2C), 129.8 (2C), 130.4, 131.5 (2C), 133.2, 138.6, 141.2, 146.8, 148.9, 160.1. HRMS (ESI)  $m/z$ :  $[\text{M} + \text{H}]^+$  calcd for  $\text{C}_{34}\text{H}_{26}\text{ClF}_3\text{N}_3\text{O}_4$  632.1558, found 632.1549.

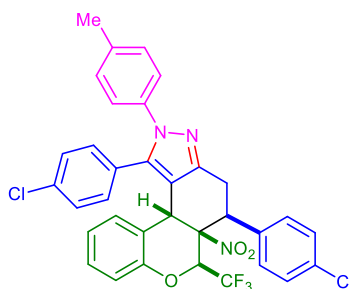

( $5S^*$ , $5aR^*$ , $6S^*$ , $11bS^*$ )-1,5-Bis(4-chlorophenyl)-5a-nitro-2-(*p*-tolyl)-6-(trifluoromethyl)-2,4,5,5a,6,11b-hexahydrochromeno[4,3-e]indazole (**12d**). Obtained according to the general procedure

from **5am** (56.4 mg) and *p*-methylphenylhydrazine hydrochloride (63.4 mg). Yield 41.5 mg (64%), white powder, mp 255–256 °C. IR (ATR): 1587, 1549, 1517, 1487, 1456, 1371, 1273, 1221 cm<sup>-1</sup>; <sup>1</sup>H NMR (500 MHz, CDCl<sub>3</sub>) δ 2.36 (s, 3H), 3.11 (dd, *J* = 17.1, 5.5 Hz, 1H), 3.22 (dd, *J* = 17.1, 13.1 Hz, 1H), 3.76 (dd, *J* = 13.1, 5.5 Hz, 1H), 4.82 (q, <sup>3</sup>*J*<sub>H,F</sub> = 7.2 Hz, 1H), 5.20 (s, 1H), 6.77–6.86 (m, 2H), 7.04–7.16 (m, 5H), 7.17–7.23 (m, 1H), 7.34–7.47 (m, 8H); <sup>19</sup>F NMR (471 MHz, CDCl<sub>3</sub>) δ 90.80 (d, *J* = 7.2 Hz, CF<sub>3</sub>); <sup>13</sup>C{<sup>1</sup>H} NMR (126 MHz, CDCl<sub>3</sub>) δ 21.2, 26.6, 34.5 (br. s), 43.9, 74.0 (q, <sup>2</sup>*J*<sub>C,F</sub> = 31.2 Hz), 86.5, 115.1, 116.8, 122.2, 123.0, 123.3 (q, <sup>1</sup>*J*<sub>C,F</sub> = 287.3 Hz, CF<sub>3</sub>), 125.3 (2C), 128.9 (2C), 129.1, 129.3, 129.4, 129.7 (2C), 130.0 (2C), 130.9 (2C), 131.9 (2C), 134.3, 135.1, 135.4, 137.3, 137.9, 139.9, 145.7, 148.8. HRMS (ESI) *m/z*: [M + H]<sup>+</sup> calcd for C<sub>34</sub>H<sub>25</sub>Cl<sub>2</sub>F<sub>3</sub>N<sub>3</sub>O<sub>3</sub> 650.1220, found 650.1234.

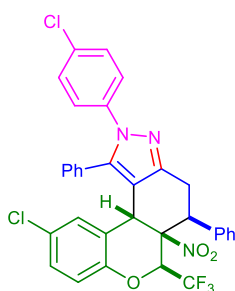

(*5S*\*,*5aR*\*,*6S*\*,*11bS*\*)-10-Chloro-2-(4-chlorophenyl)-5a-nitro-1,5-diphenyl-6-(trifluoromethyl)-2,4,5,5a,6,11b-hexahydrochromeno[4,3-*e*]indazole (**12e**). Obtained according to the general procedure from **5ba** (53.0 mg) and *p*-chlorophenylhydrazine hydrochloride (71.6 mg). Yield 43.8 mg (69%), white powder, mp 234–235 °C. IR (ATR): 1586, 1547, 1504, 1494, 1479, 1369, 1277, 1216 cm<sup>-1</sup>; <sup>1</sup>H NMR (500 MHz, CDCl<sub>3</sub>) δ 3.16 (dd, *J* = 17.2, 5.4 Hz, 1H), 3.27 (dd, *J* = 17.2, 13.1 Hz, 1H), 3.72 (dd, *J* = 13.1, 5.4 Hz, 1H), 4.87 (q, <sup>3</sup>*J*<sub>H,F</sub> = 7.2 Hz, 1H), 5.18 (s, 1H), 6.87 (d, *J* = 1.6 Hz, 1H), 6.99 (d, *J* = 8.7 Hz, 1H), 7.12 (dd, *J* = 8.7, 2.1 Hz, 1H), 7.19 (d, *J* = 8.7 Hz, 2H), 7.28 (d, *J* = 8.7 Hz, 2H), 7.38–7.54 (m, 10H); <sup>19</sup>F NMR (471 MHz, CDCl<sub>3</sub>) δ 91.05 (d, *J* = 7.2 Hz, CF<sub>3</sub>); <sup>13</sup>C{<sup>1</sup>H} NMR (126 MHz, CDCl<sub>3</sub>) δ 26.5, 34.5 (q, <sup>3</sup>*J*<sub>C,F</sub> = 2.1 Hz, C-5a), 44.6, 74.1 (q, <sup>2</sup>*J*<sub>C,F</sub> = 31.2 Hz, C-6), 86.3, 115.2, 118.1, 123.3 (q, <sup>1</sup>*J*<sub>C,F</sub> = 287.6 Hz, CF<sub>3</sub>), 124.0, 126.4 (2C), 128.1, 128.7 (2C), 129.1 (2C), 129.2, 129.3, 129.65, 129.71 (3C), 130.0 (2C), 130.1, 130.4 (2C), 133.3, 135.5, 138.4, 141.2, 146.6, 147.5. HRMS (ESI) *m/z*: [M + H]<sup>+</sup> calcd for C<sub>33</sub>H<sub>23</sub>Cl<sub>2</sub>F<sub>3</sub>N<sub>3</sub>O<sub>3</sub> 636.1063, found 636.1060.

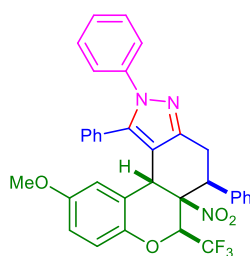

(*5S*\*,*5aR*\*,*6S*\*,*11bS*\*)-10-Methoxy-5a-nitro-1,2,5-triphenyl-6-(trifluoromethyl)-2,4,5,5a,6,11b-

*hexahydrochromeno[4,3-*e*]indazole (12f)*. Obtained according to the general procedure from **5ia** (52.5 mg) and phenylhydrazine hydrochloride (57.8 mg). Yield 42.9 mg (72%), white powder, mp 240–241 °C. IR (ATR): 1602, 1550, 1494, 1445, 1365, 1345, 1270, 1203 cm<sup>-1</sup>; <sup>1</sup>H NMR (600 MHz, CDCl<sub>3</sub>) δ 3.17 (dd, *J* = 17.1, 5.3 Hz, 1H), 3.29 (dd, *J* = 17.1, 13.3 Hz, 1H), 3.37 (s, 3H), 3.83 (dd, *J* = 13.3, 5.3 Hz, 1H), 4.83 (q, <sup>3</sup>*J*<sub>H,F</sub> = 7.3 Hz, 1H), 5.31 (s, 1H), 6.35 (d, *J* = 2.9 Hz, 1H), 6.73 (dd, *J* = 8.9, 2.9 Hz, 1H), 6.98 (d, *J* = 8.9 Hz, 1H), 7.24 (d, *J* = 7.2 Hz, 2H), 7.27–7.34 (m, 3H), 7.39–7.52 (m, 10H); <sup>19</sup>F NMR (471 MHz, CDCl<sub>3</sub>) δ 90.99 (d, *J* = 7.3 Hz, CF<sub>3</sub>); <sup>13</sup>C{<sup>1</sup>H} NMR (151 MHz, CDCl<sub>3</sub>) δ 26.5, 34.8 (br. s, C-5a), 44.6, 55.9, 74.0 (q, <sup>2</sup>*J*<sub>C,F</sub> = 30.9 Hz, C-6), 86.9, 113.0, 115.3, 116.4, 117.6, 122.8, 123.4 (q, <sup>3</sup>*J*<sub>C,F</sub> = 287.8 Hz, CF<sub>3</sub>), 125.5 (2C), 127.6, 128.6 (2C), 128.98, 128.99 (2C), 129.3, 129.6 (2C), 129.7 (2C), 130.5 (2C), 130.6, 135.9, 139.9, 140.8, 142.5, 146.5, 155.1. HRMS (ESI) *m/z*: [M + H]<sup>+</sup> calcd for C<sub>34</sub>H<sub>27</sub>F<sub>3</sub>N<sub>3</sub>O<sub>4</sub> 598.1954, found 598.1934.

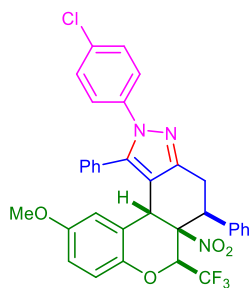

*(5S\*,5aR\*,6S\*,11bS\*)-2-(4-Chlorophenyl)-10-methoxy-5a-nitro-1,5-diphenyl-6-(trifluoromethyl)-2,4,5,5a,6,11b-hexahydrochromeno[4,3-*e*]indazole (12g)*. Obtained according to the general procedure from **5ia** (52.5 mg) and *p*-chlorophenylhydrazine hydrochloride (71.6 mg). Yield 45.4 mg (72%), white powder, mp 242–243 °C. IR (ATR): 1595, 1547, 1463, 1447, 1373, 1354, 1272, 1206 cm<sup>-1</sup>; <sup>1</sup>H NMR (600 MHz, CDCl<sub>3</sub>) δ 3.15 (dd, *J* = 17.1, 5.3 Hz, 1H), 3.28 (dd, *J* = 17.1, 13.3 Hz, 1H), 3.38 (s, 3H), 3.82 (dd, *J* = 13.3, 5.3 Hz, 1H), 4.82 (q, <sup>3</sup>*J*<sub>H,F</sub> = 7.2 Hz, 1H), 5.28 (s, 1H), 6.33 (d, *J* = 2.5 Hz, 1H), 6.73 (dd, *J* = 8.9, 2.5 Hz, 1H), 6.98 (d, *J* = 8.9 Hz, 1H), 7.17 (d, *J* = 8.6 Hz, 2H), 7.29 (d, *J* = 8.6 Hz, 2H), 7.41–7.51 (m, 10H); <sup>19</sup>F NMR (471 MHz, CDCl<sub>3</sub>) δ 91.00 (d, *J* = 7.2 Hz, 3F); <sup>13</sup>C{<sup>1</sup>H} NMR (151 MHz, CDCl<sub>3</sub>) δ 26.5, 34.7 (br. s, C-5a), 44.5, 55.9, 74.0 (q, <sup>2</sup>*J*<sub>C,F</sub> = 30.9 Hz, C-6), 86.8, 113.0, 115.7, 116.3, 117.7, 122.6, 123.4 (q, <sup>1</sup>*J*<sub>C,F</sub> = 287.8 Hz, CF<sub>3</sub>), 126.5 (2C), 128.6 (2C), 129.0, 129.1 (2C), 129.5, 129.6 (2C), 129.9 (2C), 130.3, 130.5 (2C), 133.3, 135.8, 138.5, 140.8, 142.5, 146.9, 155.1. HRMS (ESI) *m/z*: [M + H]<sup>+</sup> calcd for C<sub>34</sub>H<sub>26</sub>ClF<sub>3</sub>N<sub>3</sub>O<sub>4</sub> 632.1564, found 632.1572.

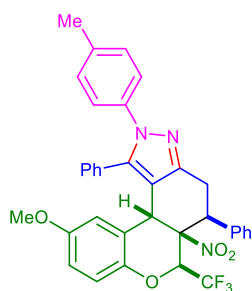

(5*S*\*,5*aR*\*,6*S*\*,11*bS*\*)-10-Methoxy-5*a*-nitro-1,5-diphenyl-2-(*p*-tolyl)-6-(trifluoromethyl)-2,4,5,5*a*,6,11*b*-hexahydrochromeno[4,3-*e*]indazole (**12h**). Obtained according to the general procedure from **5ia** (52.5 mg) and *p*-methylphenylhydrazine hydrochloride (63.4 mg). Yield 46.0 mg (75%), white powder, mp 220–221 °C. IR (ATR): 1613, 1548, 1517, 1496, 1464, 1448, 1374, 1354, 1269, 1205 cm<sup>-1</sup>; <sup>1</sup>H NMR (600 MHz, CDCl<sub>3</sub>) δ 2.35 (s, 3H), 3.16 (dd, *J* = 17.1, 4.9 Hz, 1H), 3.29 (dd, *J* = 17.1, 13.2 Hz, 1H), 3.36 (s, 3H), 3.83 (dd, *J* = 13.2, 4.9 Hz, 1H), 4.82 (q, <sup>3</sup>*J*<sub>H,F</sub> = 7.2 Hz, 1H), 5.30 (s, 1H), 6.35 (d, *J* = 1.5 Hz, 1H), 6.72 (dd, *J* = 8.9, 1.5 Hz, 1H), 6.97 (d, *J* = 8.9 Hz, 1H), 7.11 (s, 4H), 7.39–7.50 (m, 10H); <sup>19</sup>F NMR (471 MHz, CDCl<sub>3</sub>) δ 90.99 (d, *J* = 7.2 Hz, CF<sub>3</sub>); <sup>13</sup>C{<sup>1</sup>H} NMR (151 MHz, CDCl<sub>3</sub>) δ 21.2, 26.5, 34.8 (br. s, C-5*a*), 44.6, 55.9, 74.0 (q, <sup>2</sup>*J*<sub>C,F</sub> = 30.8 Hz, C-6), 86.9, 112.9, 115.0, 116.4, 117.6, 122.8, 123.4 (q, <sup>1</sup>*J*<sub>C,F</sub> = 287.6 Hz, CF<sub>3</sub>), 125.3 (2C), 128.6 (2C), 128.9, 129.1, 129.5 (2C), 129.6 (4C), 130.6 (2C), 130.7, 136.0, 137.5, 140.7, 142.5, 146.2, 155.1 (1C was not observed). HRMS (ESI) *m/z*: [M + H]<sup>+</sup> calcd for C<sub>35</sub>H<sub>29</sub>F<sub>3</sub>N<sub>3</sub>O<sub>4</sub> 612.2110, found 612.2098.

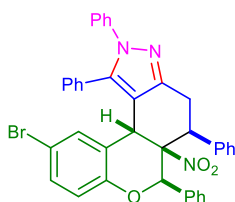

(5*S*\*,5*aR*\*,6*R*\*,11*bS*\*)-10-Bromo-5*a*-nitro-1,2,5,6-tetraphenyl-2,4,5,5*a*,6,11*b*-hexahydrochromeno[4,3-*e*]indazole (**12i**). Obtained according to the general procedure from **5la** (58.2 mg) and phenylhydrazine hydrochloride **10a** (57.8 mg). Yield 56.6 mg (86%), white powder, mp 318–319 °C. IR (ATR): 1600, 1542, 1508, 1496, 1475, 1368, 1273, 1225 cm<sup>-1</sup>; <sup>1</sup>H NMR (500 MHz, CDCl<sub>3</sub>) δ 3.20 (dd, *J* = 16.9, 5.1 Hz, 1H), 3.37 (dd, *J* = 16.9, 13.2 Hz, 1H), 3.75 (dd, *J* = 13.2, 5.1 Hz, 1H), 5.02 (s, 1H), 5.42 (s, 1H), 6.90–6.97 (m, 3H), 7.03 (s, 1H), 7.18–7.35 (m, 10H), 7.37–7.50 (m, 7H), 7.53–7.59 (m, 2H); <sup>13</sup>C{<sup>1</sup>H} NMR (126 MHz, CDCl<sub>3</sub>) δ 27.0, 33.5, 44.6, 78.6, 91.8, 113.9, 115.2, 118.2, 124.9, 125.2 (2C), 126.9 (2C), 127.4, 128.4 (2C), 128.5, 128.8 (2C), 128.9 (2C), 129.2, 129.5, 129.57 (2C), 129.63 (2C), 130.5, 130.8 (2C), 132.1, 132.6, 135.7, 137.0, 139.9, 141.3, 147.0, 150.3. HRMS (ESI) *m/z*: [M + H]<sup>+</sup> calcd for C<sub>38</sub>H<sub>29</sub>BrN<sub>3</sub>O<sub>3</sub> 654.1387, found 654.1383.



## X-ray crystallography

Crystals of **5aa**, **5ka**, **8a** and **12e** were grown by the slow evaporation of an acetonitrile solution, **7d** - of a toluene solution. Diffraction data were collected on a Xcalibur 3 automatic diffractometer using the standard procedure (Mo-K $\alpha$  radiation ( $\lambda = 0.71073 \text{ \AA}$ ), graphite monochromator,  $\omega$ -scanning, 293(2) K). An empirical adjustment for absorption was introduced. The structures were solved by direct methods and refined by the full-matrix least-squares method using the SHELX-97 program package.<sup>3</sup> All non-hydrogen atoms were refined with anisotropic atomic displacement and hydrogen atoms were included at the calculated positions using a riding model. The geometrical parameters were analysed using the programs OLEX2.<sup>4</sup>

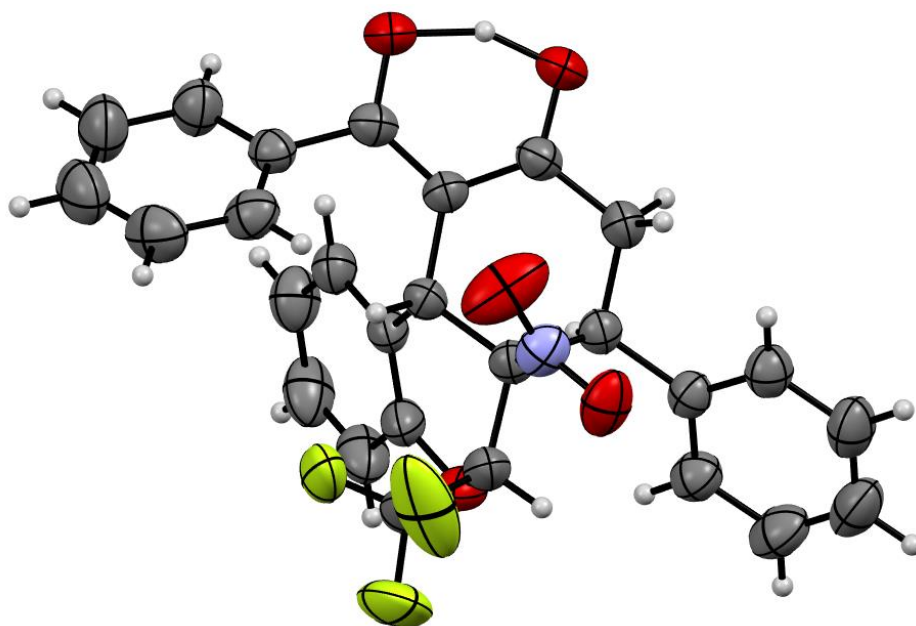

**Crystal data for 5aa (C<sub>27</sub>H<sub>20</sub>F<sub>3</sub>NO<sub>5</sub>, 495.45).** Triclinic crystals, space group  $P\bar{1}$ ,  $a = 9.7920(6)$ ,  $b = 12.2767(8)$  and  $c = 19.2845(12) \text{ \AA}$ ,  $\beta = 85.247(5)^\circ$   $V = 2307.0(3) \text{ \AA}^3$ ,  $D_c = 1.426$ , absorption coefficient  $\mu = 0.114 \text{ mm}^{-1}$ ,  $Z = 4$ . The intensities of 12399 independent reflections ( $R_{\text{int}} = 0.0522$ ) were measured. The final discrepancy factors  $R_1 = 0.0635$ ,  $wR_2 = 0.1346$ ,  $\text{GooF} = 1.001$  for 5586 reflections with  $I > 2\sigma(I)$ ;  $R_1 = 0.1528$ ,  $wR_2 = 0.1968$  (all data). Largest different peaks and holes: 0.204 and  $-0.296 \text{ e \AA}^{-3}$ . Completeness to  $\theta = 25.242^\circ$  (99.2%). Deposition number CCDC 2154343.

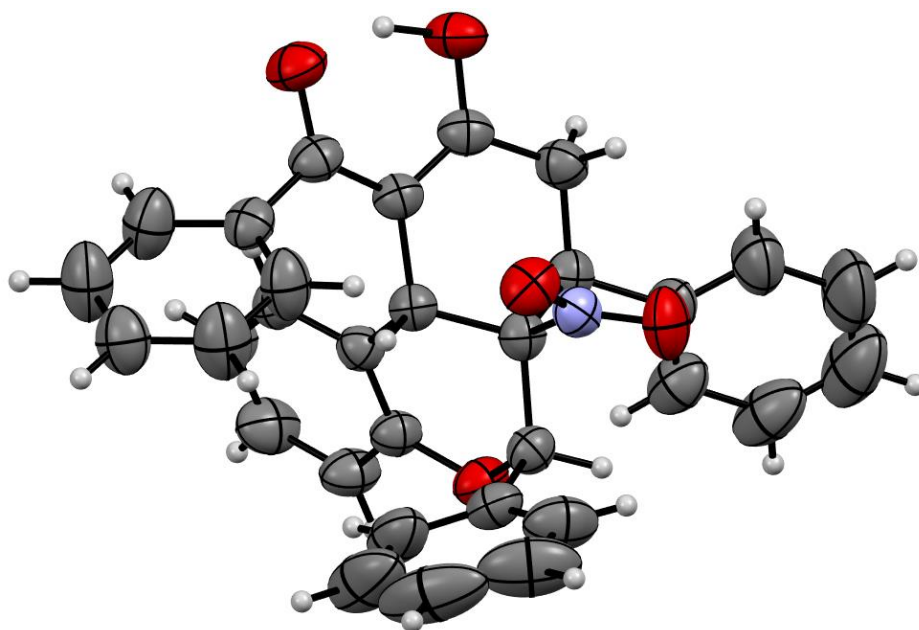

**Crystal data for 5ka (C<sub>32</sub>H<sub>25</sub>NO<sub>5</sub>, 503.53).** Monoclinic crystals, space group P2<sub>1</sub>/c,  $a = 14.4214(10)$ ,  $b = 12.2255(9)$  and  $c = 14.5032(10)$  Å,  $\beta = 95.431(7)^\circ$   $V = 2545.6(3)$  Å<sup>3</sup>,  $D_c = 1.314$ , absorption coefficient  $\mu = 0.089$  mm<sup>-1</sup>,  $Z = 4$ . The intensities of 6968 independent reflections ( $R_{\text{int}} = 0.0448$ ) were measured. The final discrepancy factors  $R_1 = 0.1294$ ,  $wR_2 = 0.1544$ , GooF = 1.005 for 3480 reflections with  $I > 2\sigma(I)$ ;  $R_1 = 0.1294$ ,  $wR_2 = 0.2183$  (all data). Largest different peaks and holes: 0.26 and  $-0.25$  e Å<sup>-3</sup>. Completeness to  $\theta = 26.000^\circ$  (99.4%). Deposition number CCDC 2154342.

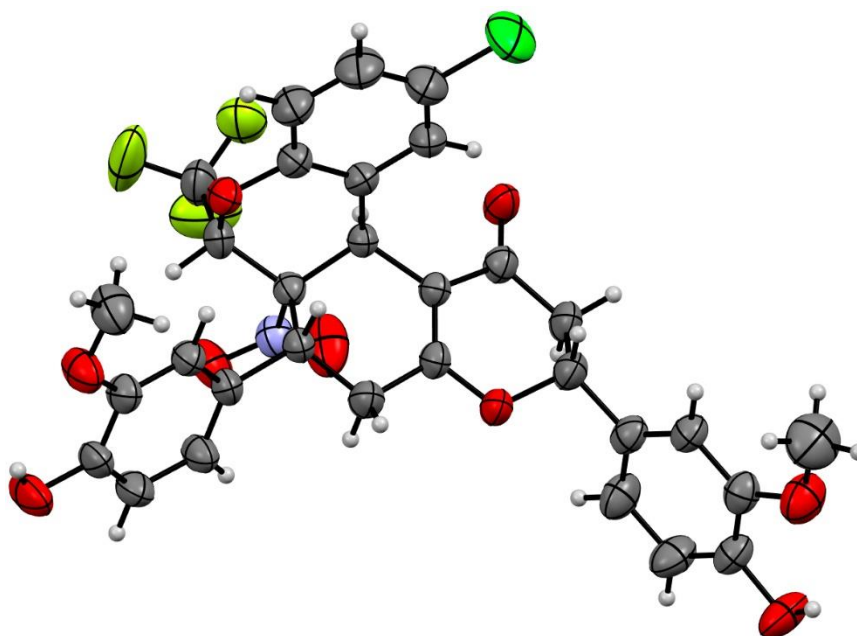

**Crystal data for 7d (C<sub>31</sub>H<sub>25</sub>ClF<sub>3</sub>NO<sub>9</sub>, 647.98).** Triclinic crystals, space group P $\bar{1}$ ,  $a = 8.9834(10)$ ,  $b = 11.4504(11)$  and  $c = 19.4781(18)$  Å,  $\beta = 86.642(8)^\circ$   $V = 1912.7(3)$  Å<sup>3</sup>,  $D_c = 1.2850$ , absorption coefficient  $\mu = 0.168$  mm<sup>-1</sup>,  $Z = 2$ . The intensities of 8637 independent reflections ( $R_{\text{int}} = 0.0383$ ) were measured. The final discrepancy factors  $R_1 = 0.073808$ , GooF = 1.043143 for 3589 reflections with  $I >$

$2\sigma(I)$ ;  $R_1 = 0.177662$ ,  $wR_2 = 0.225982$  (all data). Completeness to  $\theta = 26.000^\circ$  (98.79%). Deposition number CCDC 2154345.

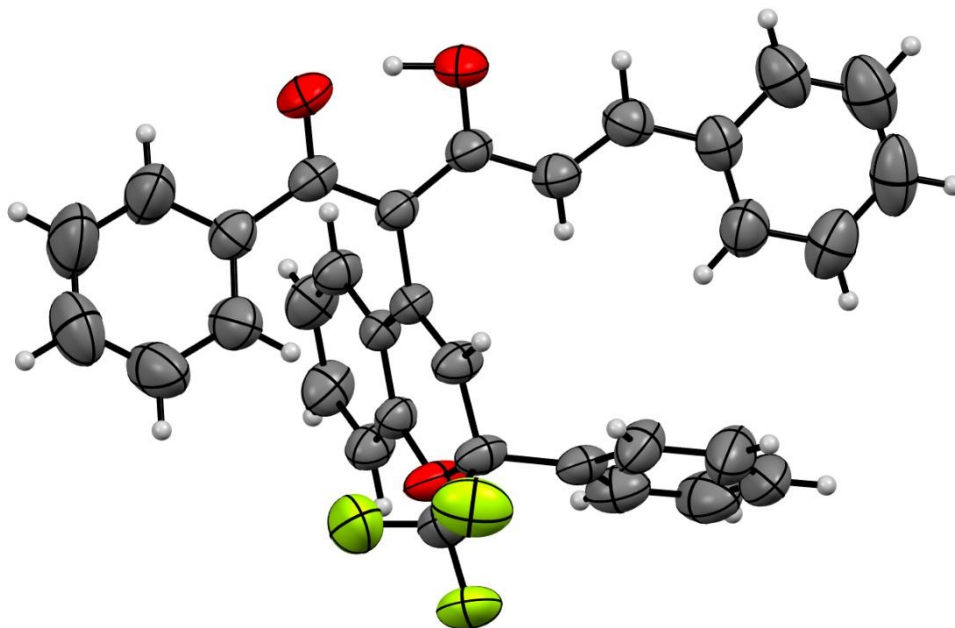

**Crystal data for 8a (C<sub>33</sub>H<sub>23</sub>F<sub>3</sub>O<sub>3</sub>, 524.51).** Triclinic crystals, space group  $P\bar{1}$ ,  $a = 11.9059(6)$ ,  $b = 13.1467(9)$  and  $c = 16.8474(12)$  Å,  $\beta = 94.131(5)^\circ$   $V = 2593.6(3)$  Å<sup>3</sup>,  $D_c = 1.343$ , absorption coefficient  $\mu = 0.100$  mm<sup>-1</sup>,  $Z = 4$ . The intensities of 13600 independent reflections ( $R_{\text{int}} = 0.0311$ ) were measured. The final discrepancy factors  $R_1 = 0.0659$ ,  $wR_2 = 0.1371$ , GooF = 1.028 for 5830 reflections with  $I > 2\sigma(I)$ ;  $R_1 = 0.1758$ ,  $wR_2 = 0.2033$  (all data). Completeness to  $\theta = 26.00^\circ$  (98.72%). Deposition number CCDC 2154344.

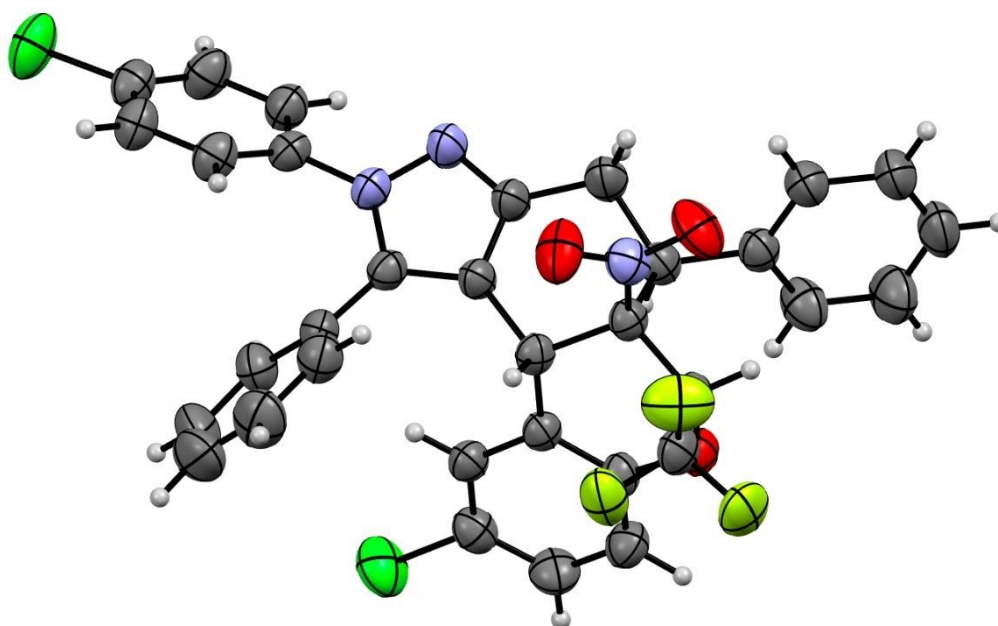

**Crystal data for 12e (C<sub>33</sub>H<sub>22</sub>Cl<sub>2</sub>F<sub>3</sub>N<sub>3</sub>O<sub>3</sub>, 636.43).** Triclinic crystals, space group  $P\bar{1}$ ,  $a = 8.4663(7)$ ,  $b = 12.6932(12)$  and  $c = 13.8600(13)$  Å,  $\beta = 78.202(7)^\circ$   $V = 1433.3(2)$  Å<sup>3</sup>,  $D_c = 1.475$ , absorption coefficient  $\mu = 0.287$  mm<sup>-1</sup>,  $Z = 2$ . The intensities of 7704 independent reflections ( $R_{\text{int}} = 0.0527$ ) were measured. The final discrepancy factors  $R_1 = 0.0604$ ,  $wR_2 = 0.1253$ , GooF = 1.020 for 3497 reflections with  $I > 2\sigma(I)$ ;  $R_1 = 0.1474$ ,  $wR_2 = 0.1880$  (all data). Largest different peaks and holes: 0.29 and -0.38 e Å<sup>-3</sup>. Completeness to  $\theta = 26.000^\circ$  (99.0%). Deposition number CCDC 2154346.

## References

1. (a) V. Y. Korotaev, I. B. Kutyashev, V. Y. Sosnovskikh, *Heteroat. Chem.*, 2005, 16, 492; (b) T. Sakakibara, M. Koezuka, R. Sudoh, *Bull. Chem. Soc. Jpn.*, 1978, 51, 3095; (c) A. Y. Barkov, V. Y. Korotaev, I. V. Kotovich, N. S. Zimnitskiy, I. B. Kutyashev, V. Y. Sosnovskikh, *Chem. Heterocycl. Compd.*, 2016, 52, 814.
2. (a) A. Arrieta, L. Beyer, E. Kleinpeter, J. Lehmann, M. Dargatz, *J. Prakt. Chem.*, 1992, 334, 696; (b) V. V. Martichonok, P. K. Chiang, P. J. Dornbush, K. M. Land. *Synth. Commun.*, 2014, 44, 1245; (c) H. J. J. Pabon, *Recl. Trav. Chim. Pays Bas*, 1964, 83, 379.
3. V. Y. Sosnovskikh, I. S. Ovsyannikov. *J. Org. Chem. USSR*, 1990, 26, 1801.
4. Sheldrick, G. M. A short history of SHELX. *Acta Crystallogr.*, 2008, 64, 112–122.
5. Dolomanov, O. V.; Bourhis, L. J.; Gildea, R. J.; Howard, J. A. K.; Puschmann, H. OLEX2: A complete structure solution, refinement and analysis program. *J. Appl. Crystallogr.*, 2009, 42, 339–341.

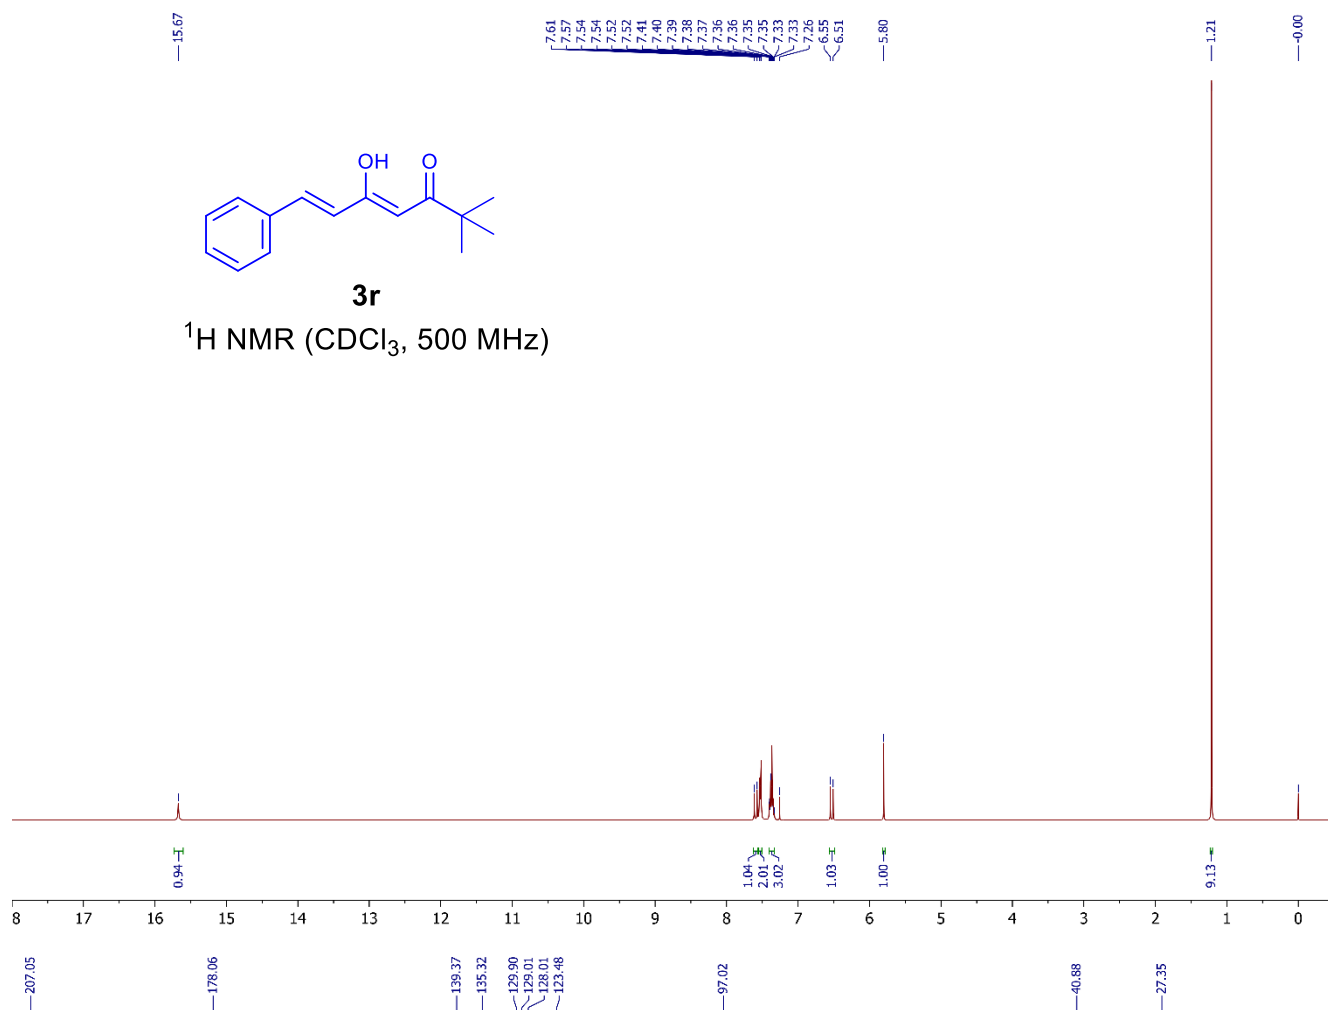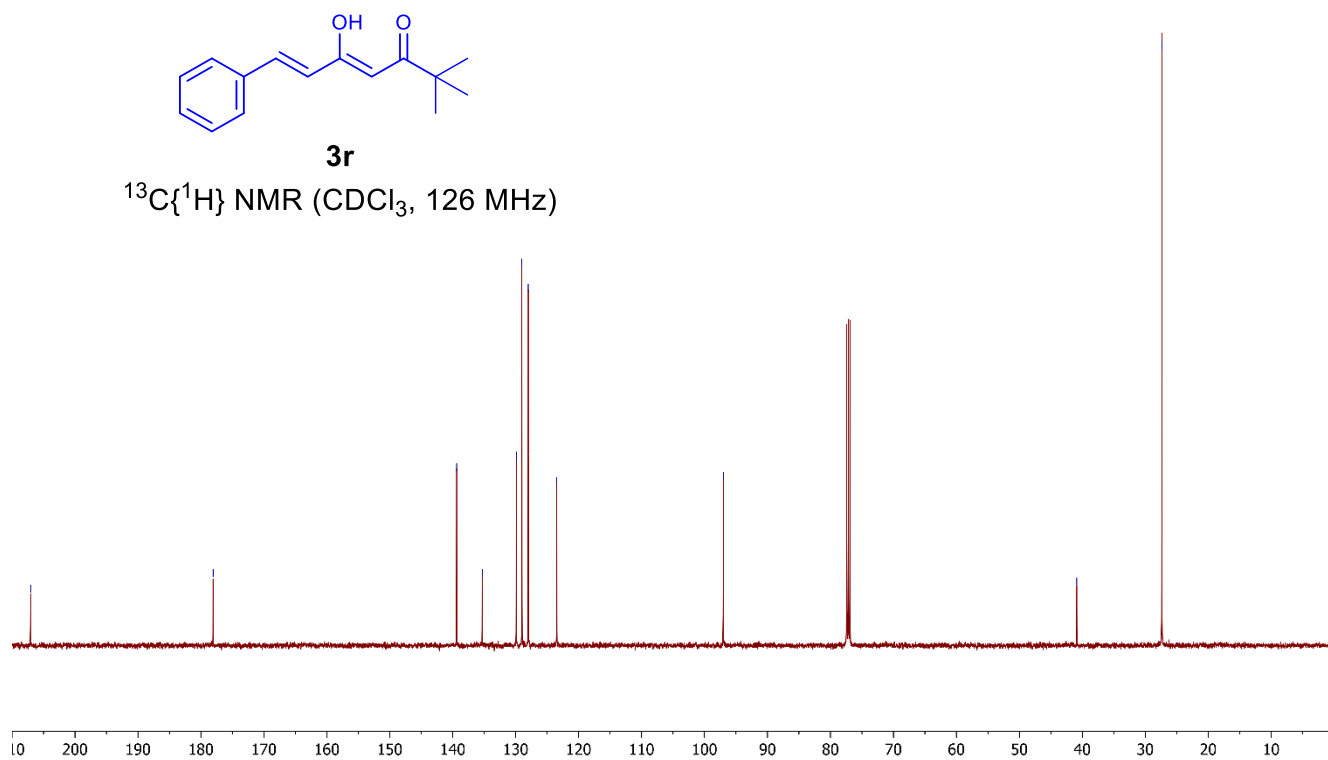

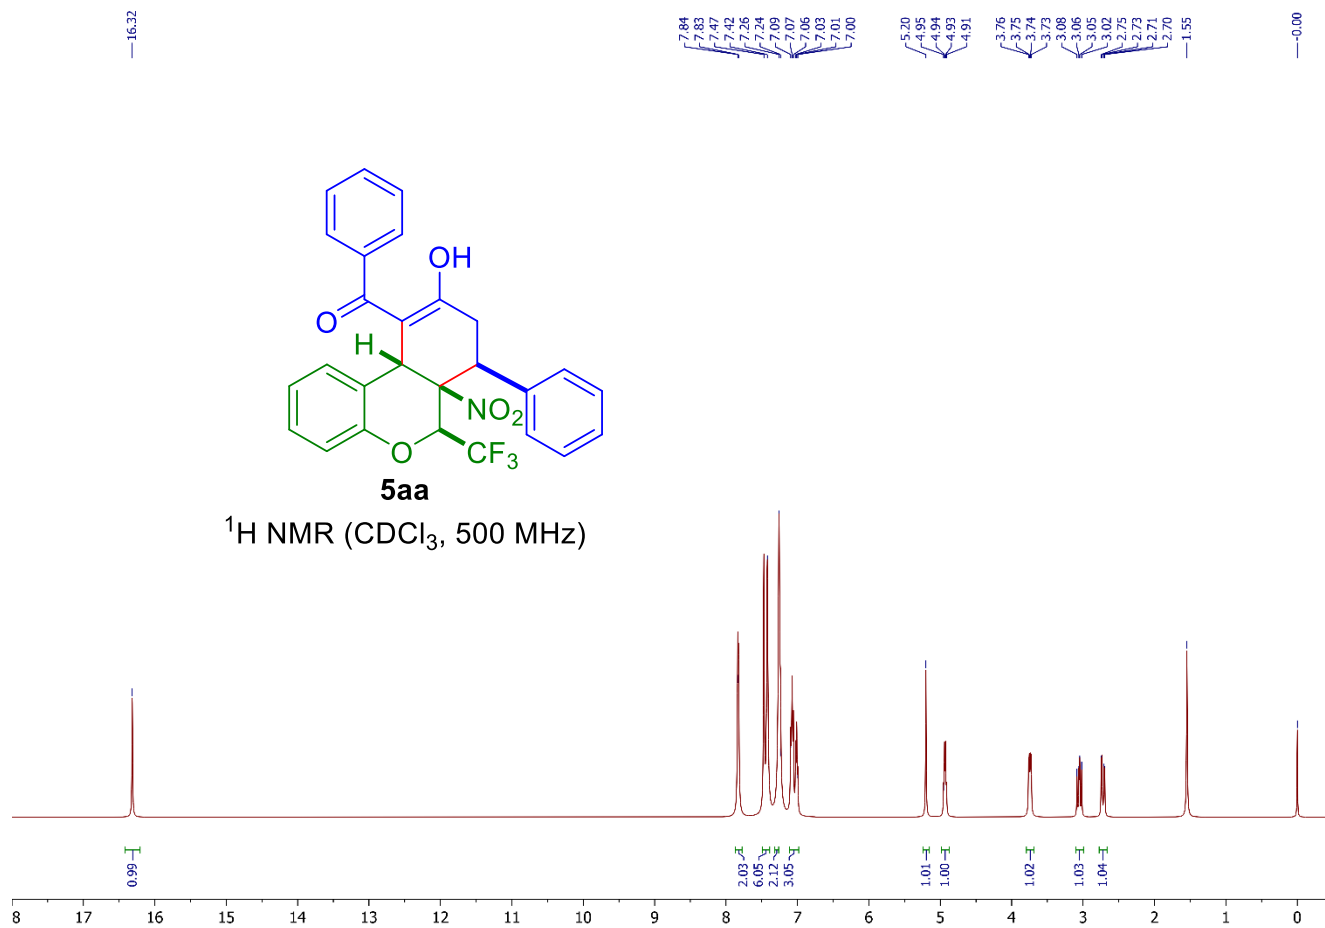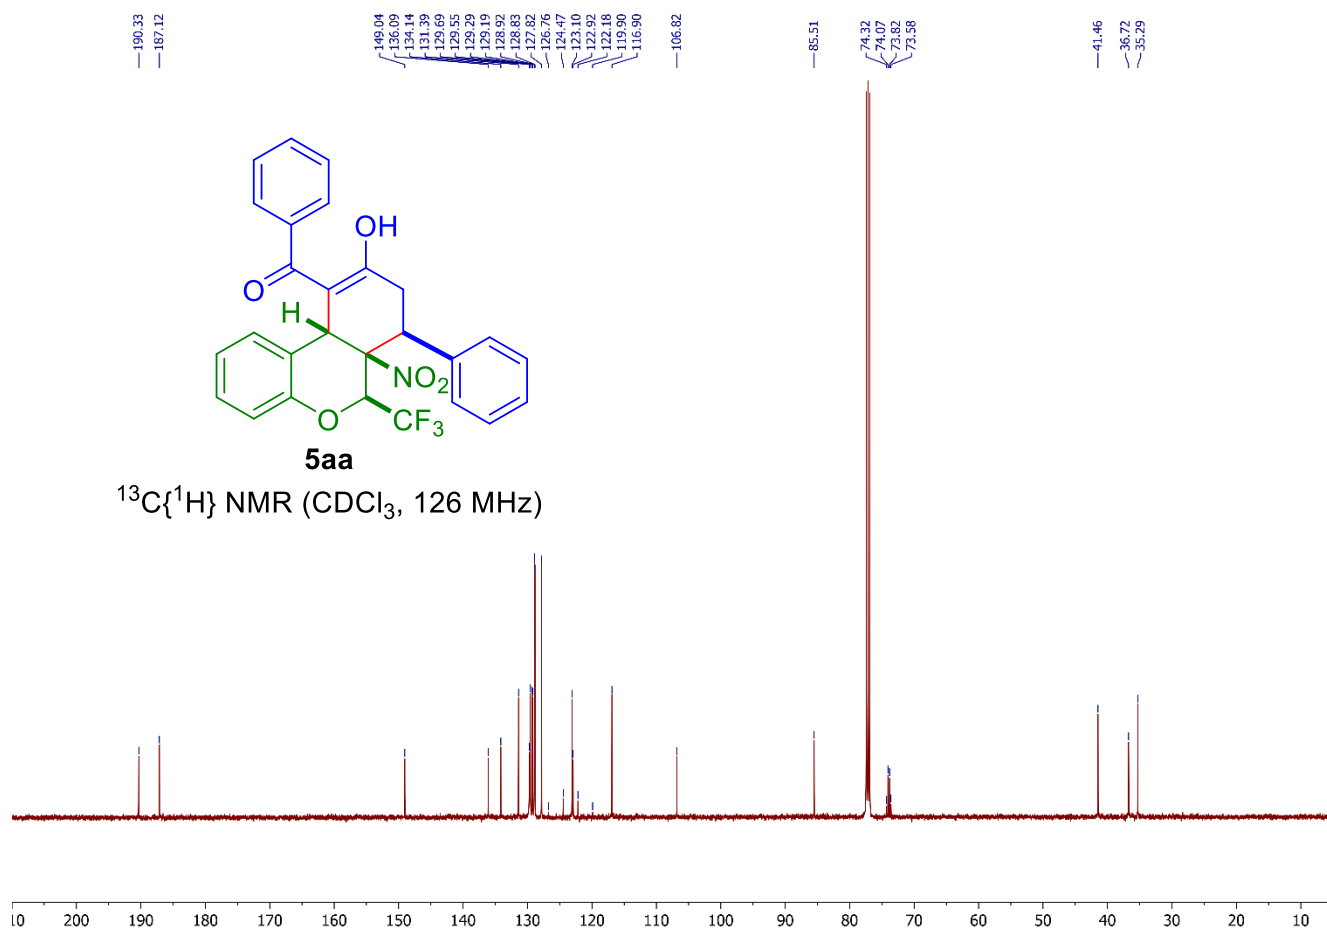

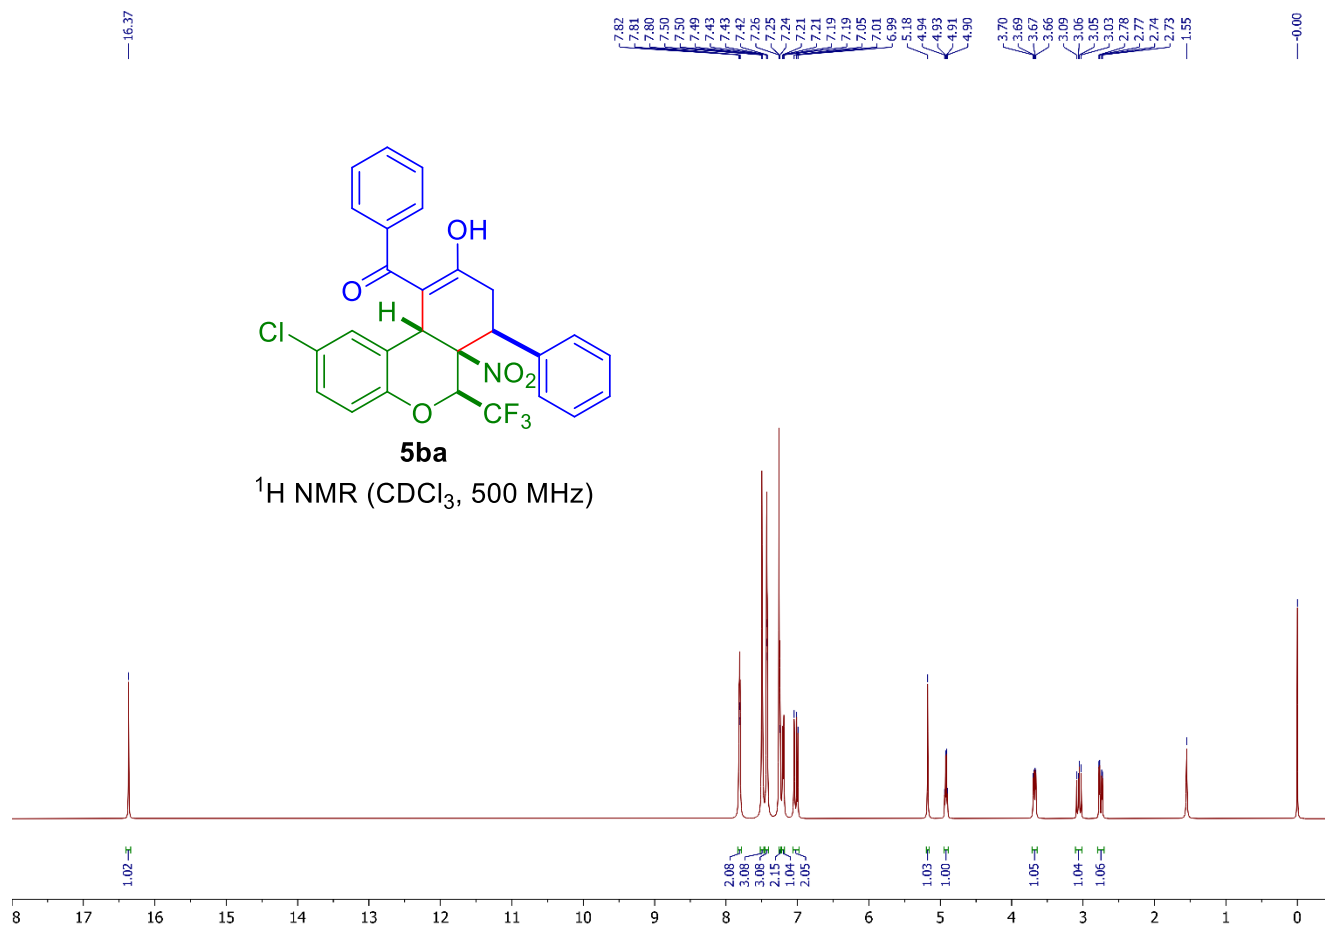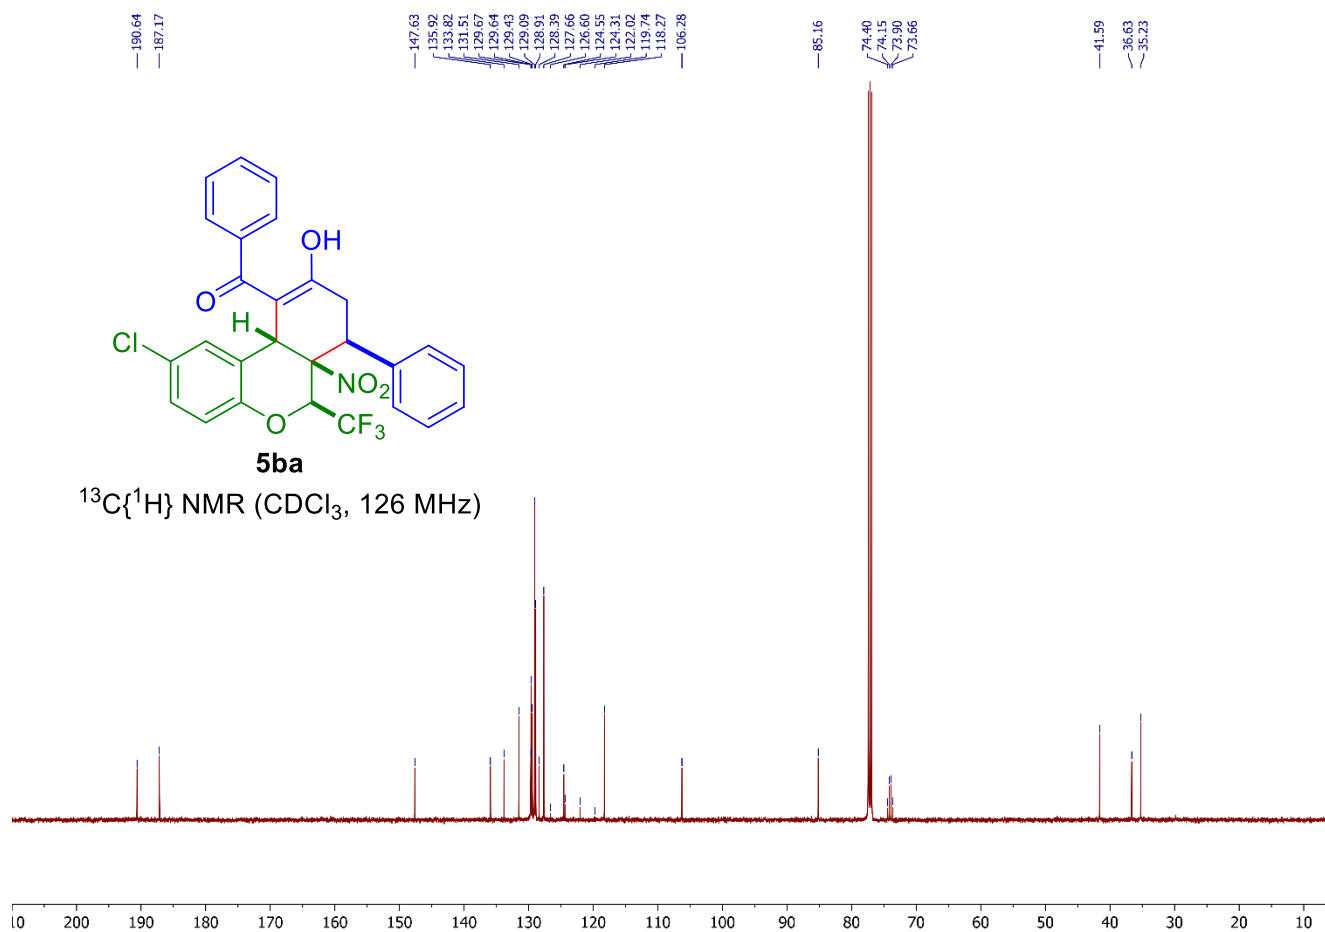



—16.36

7.80  
7.79  
7.78  
7.50  
7.49  
7.44  
7.44  
7.33  
7.26  
6.96

5.20  
5.07  
5.05  
5.04  
5.02

3.64  
3.61  
3.60

3.10  
3.06  
3.04  
2.79  
2.75  
2.74  
1.55

—0.00

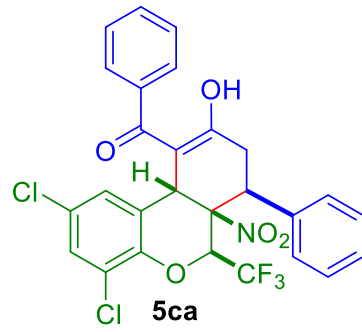

$^1\text{H NMR}$  ( $\text{CDCl}_3$ , 500 MHz)

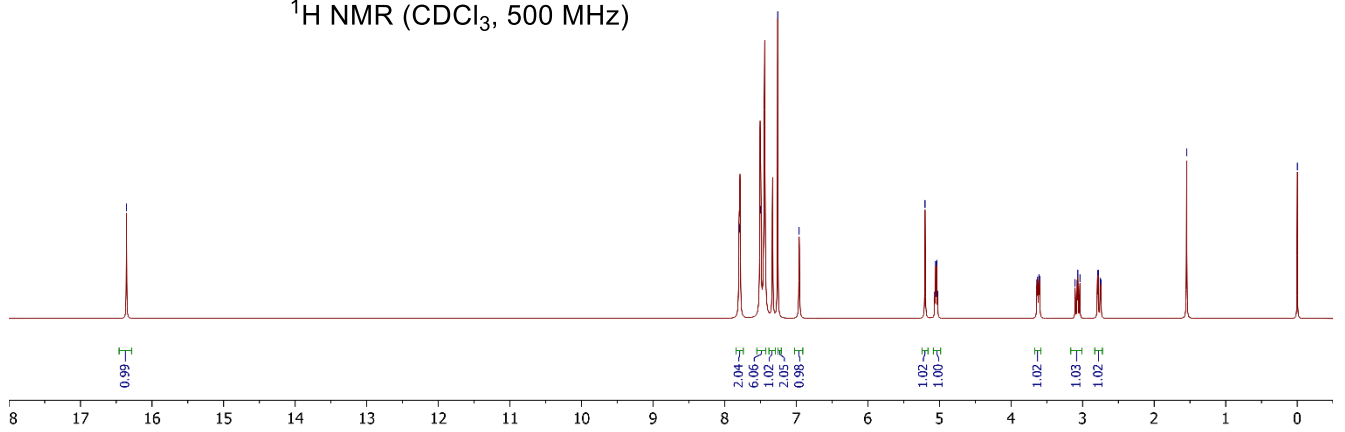

—190.70

—187.16

143.80  
135.80  
133.46  
131.63  
129.95  
129.66  
129.57  
129.16  
129.07  
128.20  
127.96  
127.81  
125.90  
124.69  
123.31  
121.80  
119.52  
106.03

—84.96

74.69  
74.44  
74.19  
73.94

—41.75

—36.85  
—35.23

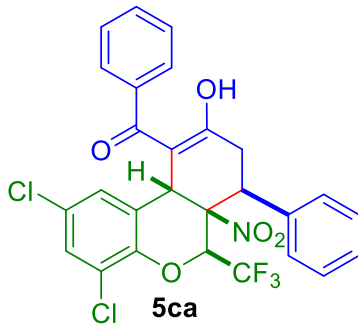

$^{13}\text{C}\{^1\text{H}\}$  NMR ( $\text{CDCl}_3$ , 126 MHz)

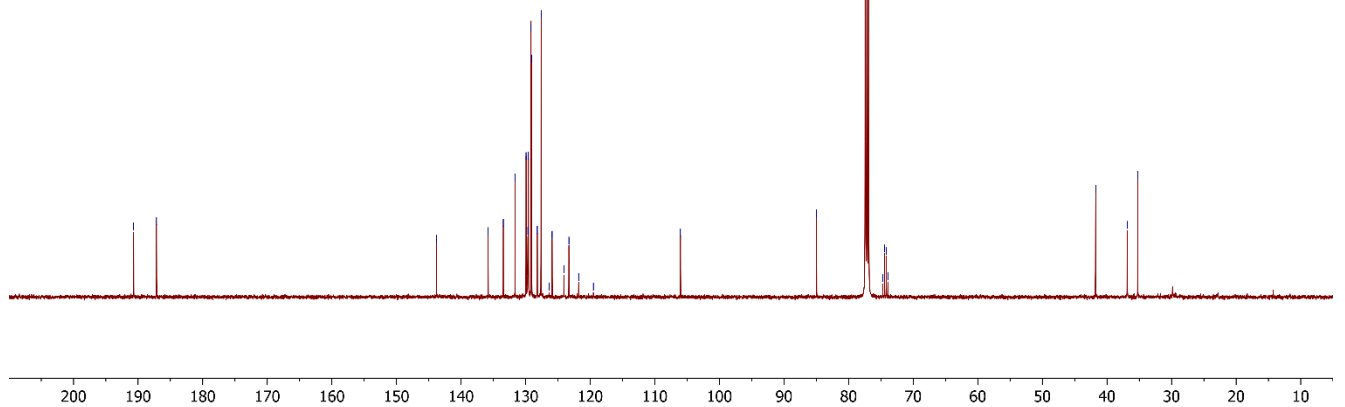

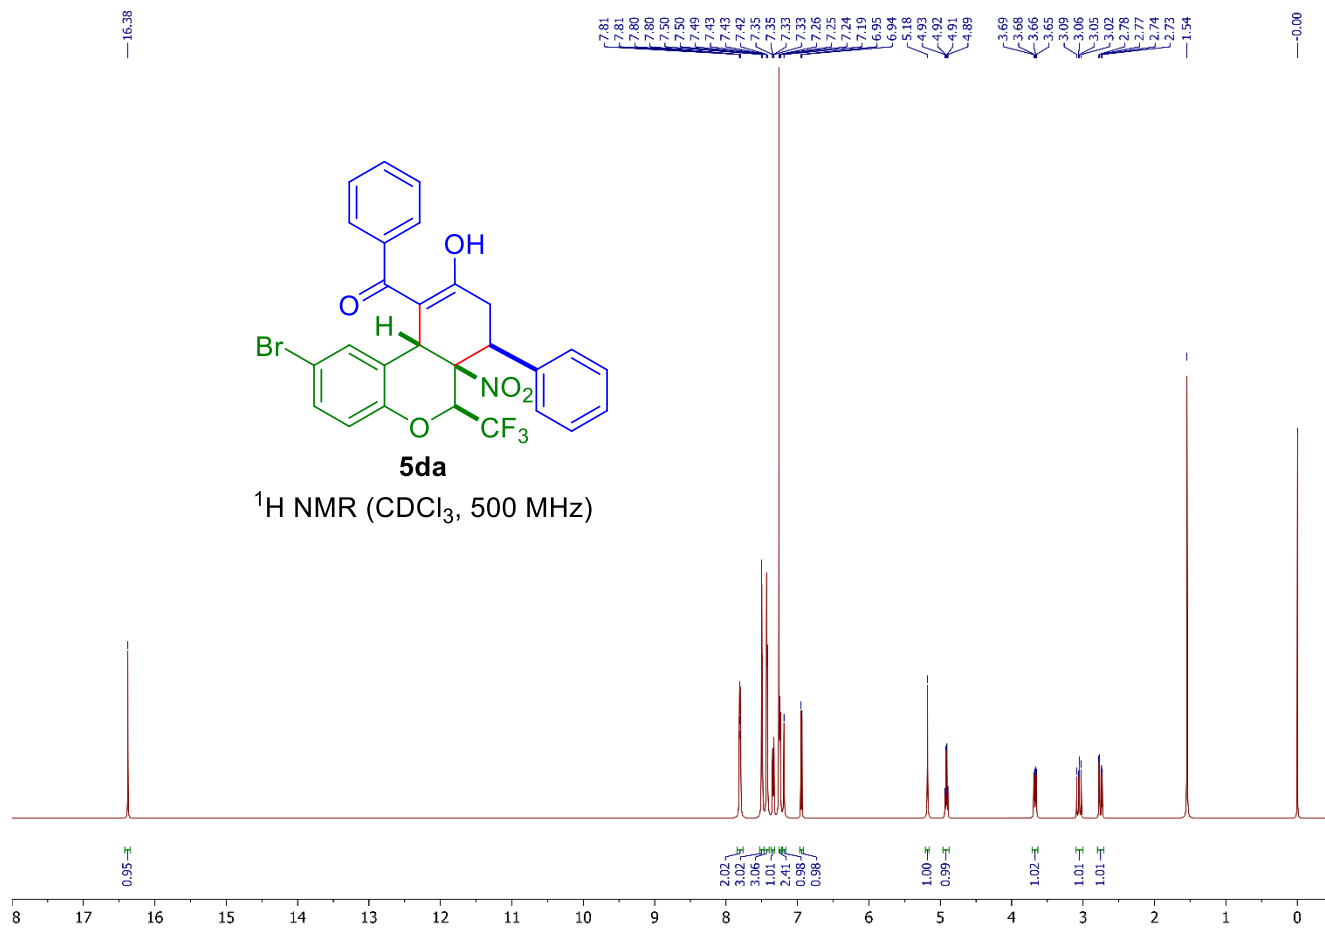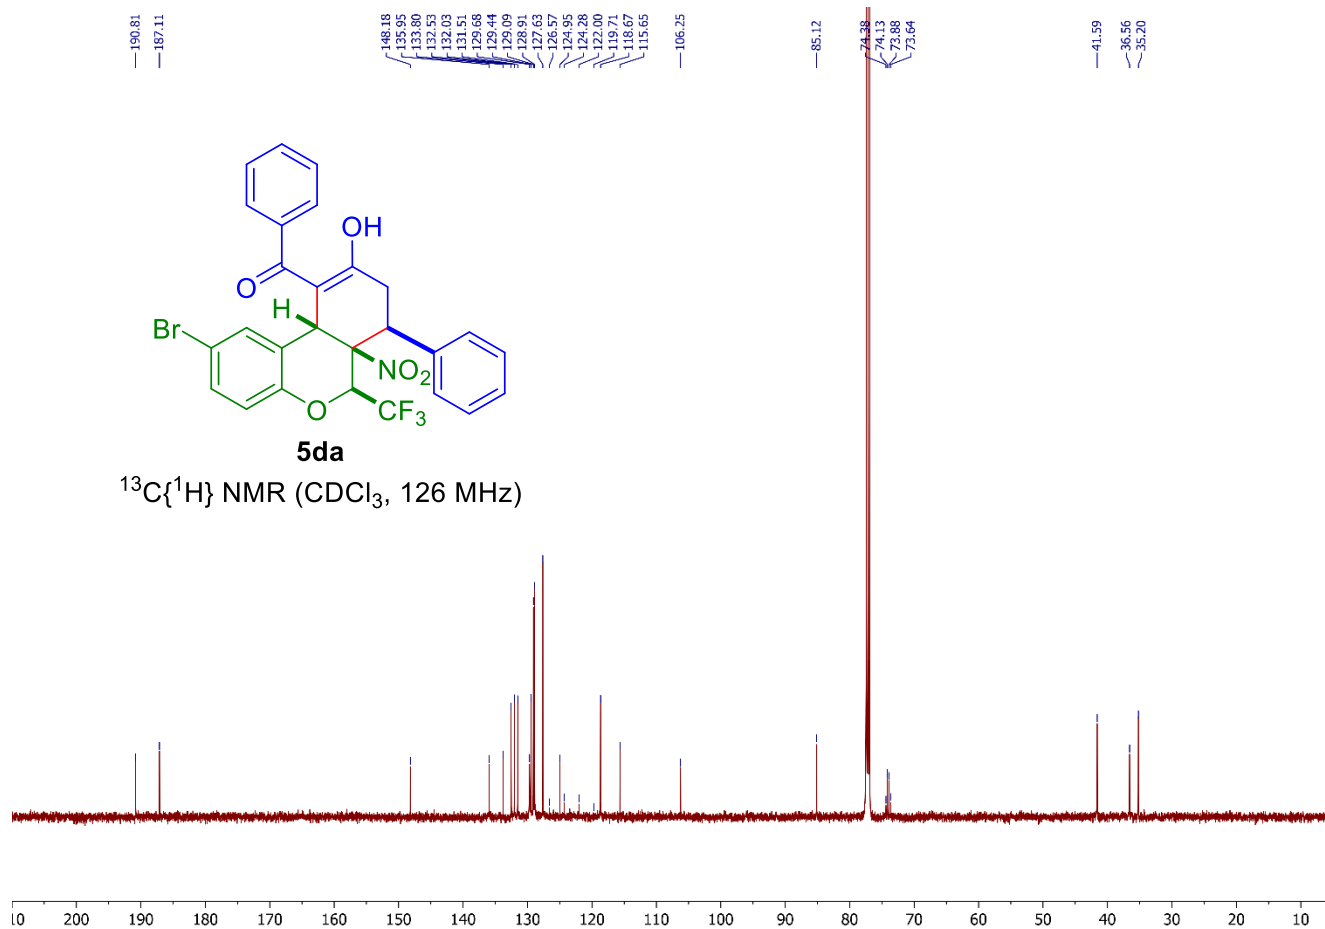

-16.37

7.79  
7.78  
7.78  
7.82  
7.82  
7.85  
7.81  
7.51  
7.50  
7.45  
7.45  
7.44  
7.26  
7.25  
7.24  
7.24  
7.14  
5.22  
5.05  
5.04  
5.02  
5.01  
3.63  
3.61  
3.60  
3.59  
3.10  
3.07  
3.06  
3.03  
2.79  
2.78  
2.75  
2.74  
1.55

-0.00

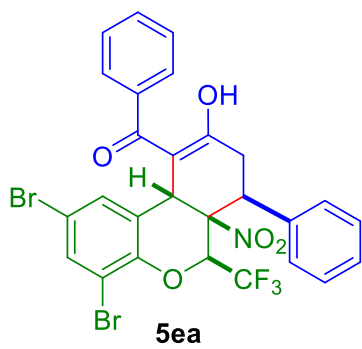

$^1\text{H}$  NMR ( $\text{CDCl}_3$ , 500 MHz)

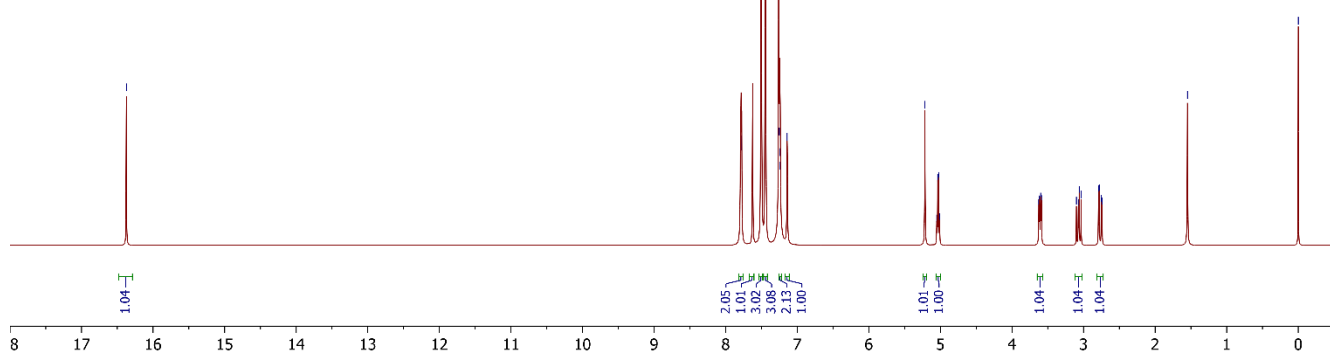

190.86  
187.11

145.15  
135.82  
133.49  
133.46  
131.62  
131.38  
129.69  
129.56  
129.15  
129.05  
127.58  
126.34  
126.09  
124.05  
121.77  
119.48  
115.55  
111.97  
105.99

84.94

74.78  
74.53  
74.33  
74.03

41.73  
36.78  
35.20

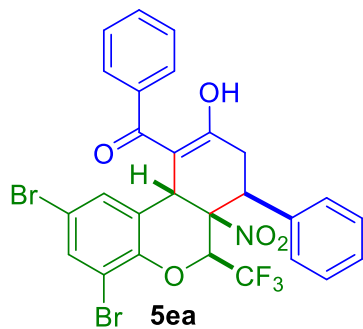

$^{13}\text{C}\{^1\text{H}\}$  NMR ( $\text{CDCl}_3$ , 126 MHz)

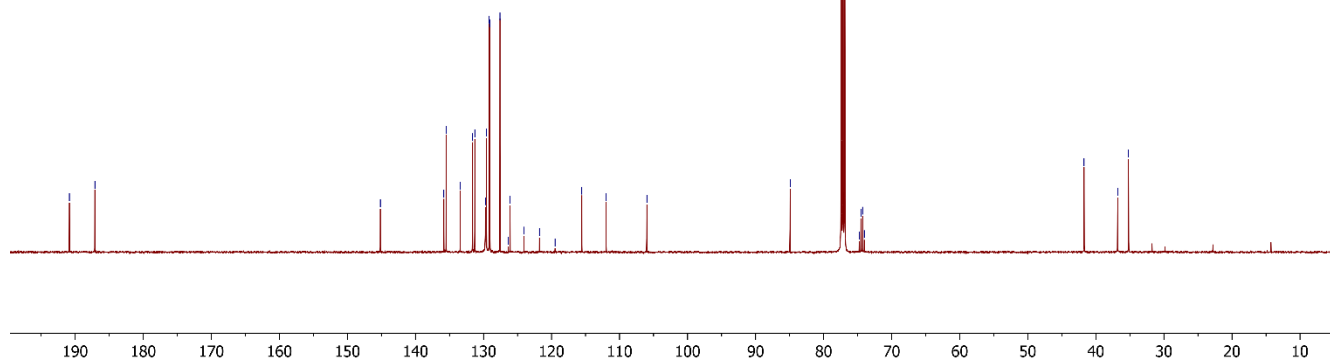

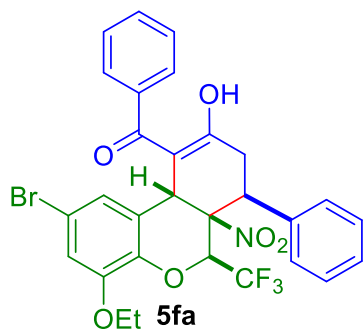

<sup>1</sup>H NMR (CDCl<sub>3</sub>, 500 MHz)

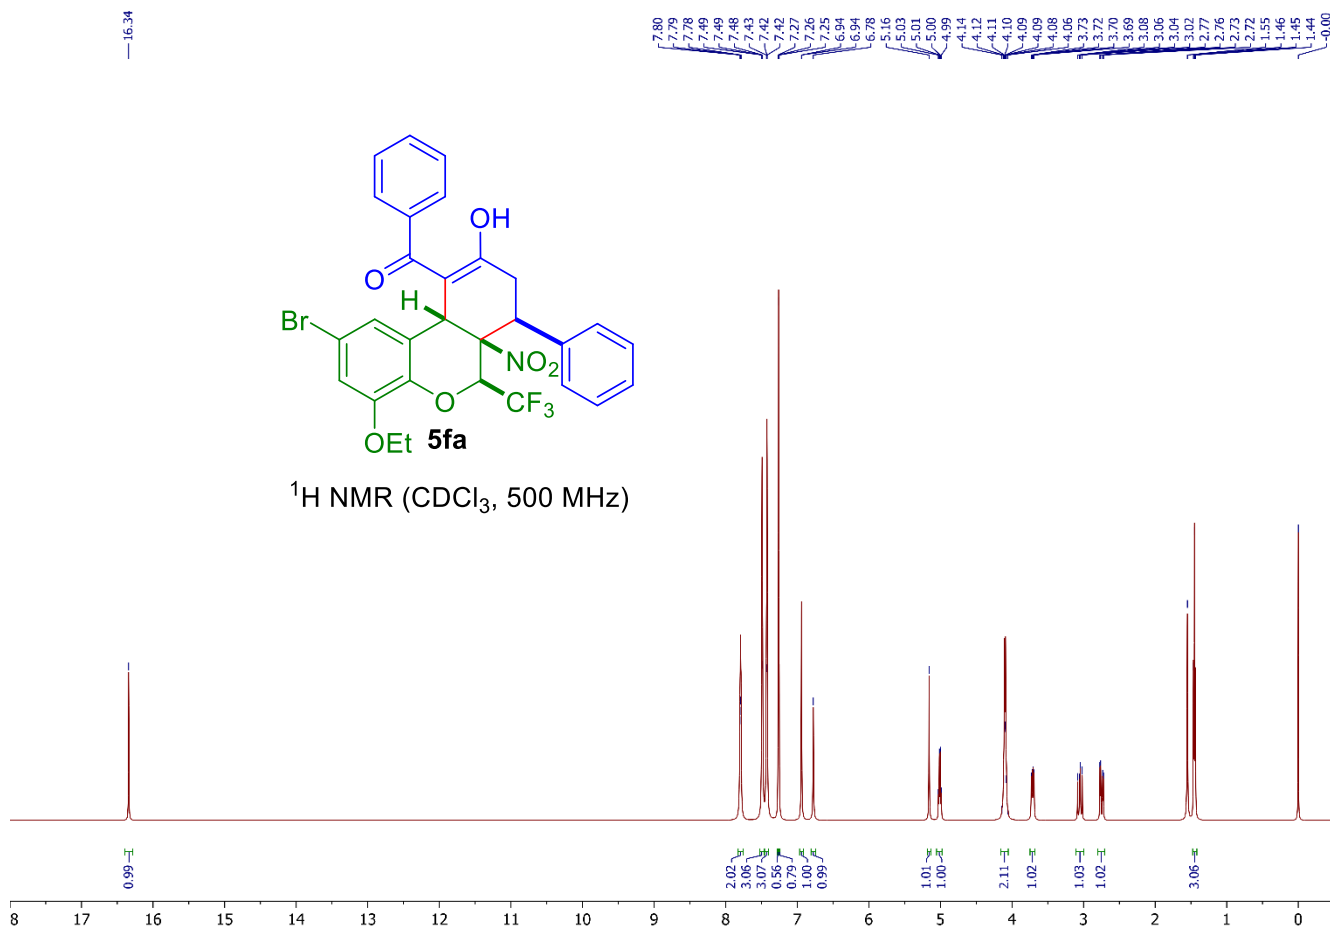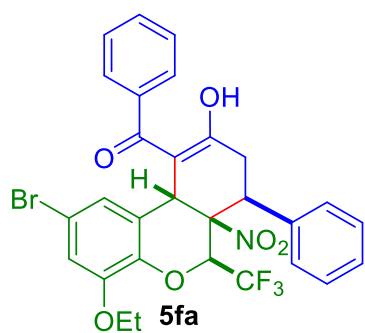

<sup>13</sup>C{<sup>1</sup>H} NMR (CDCl<sub>3</sub>, 126 MHz)

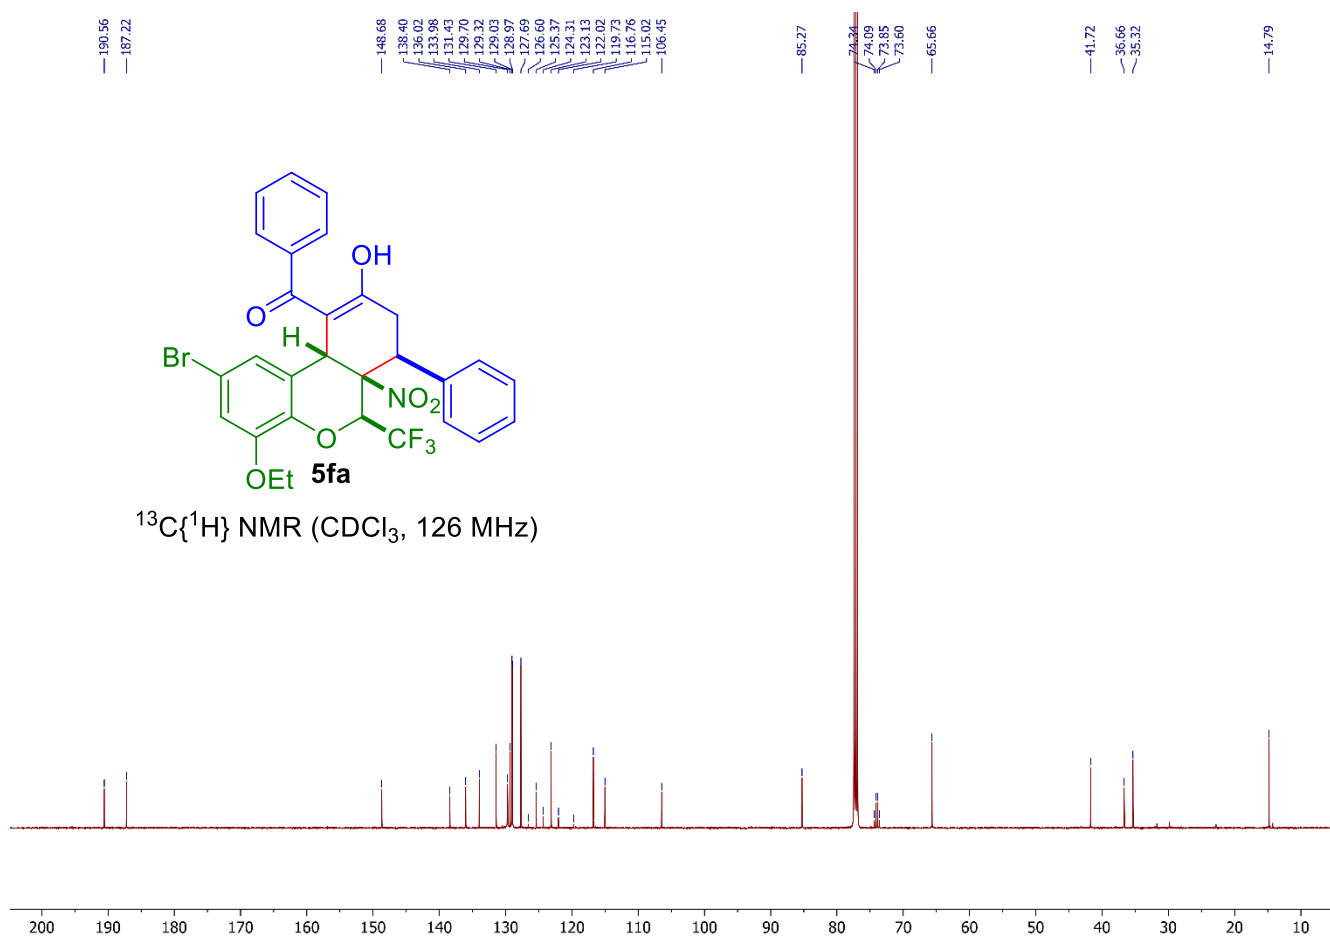

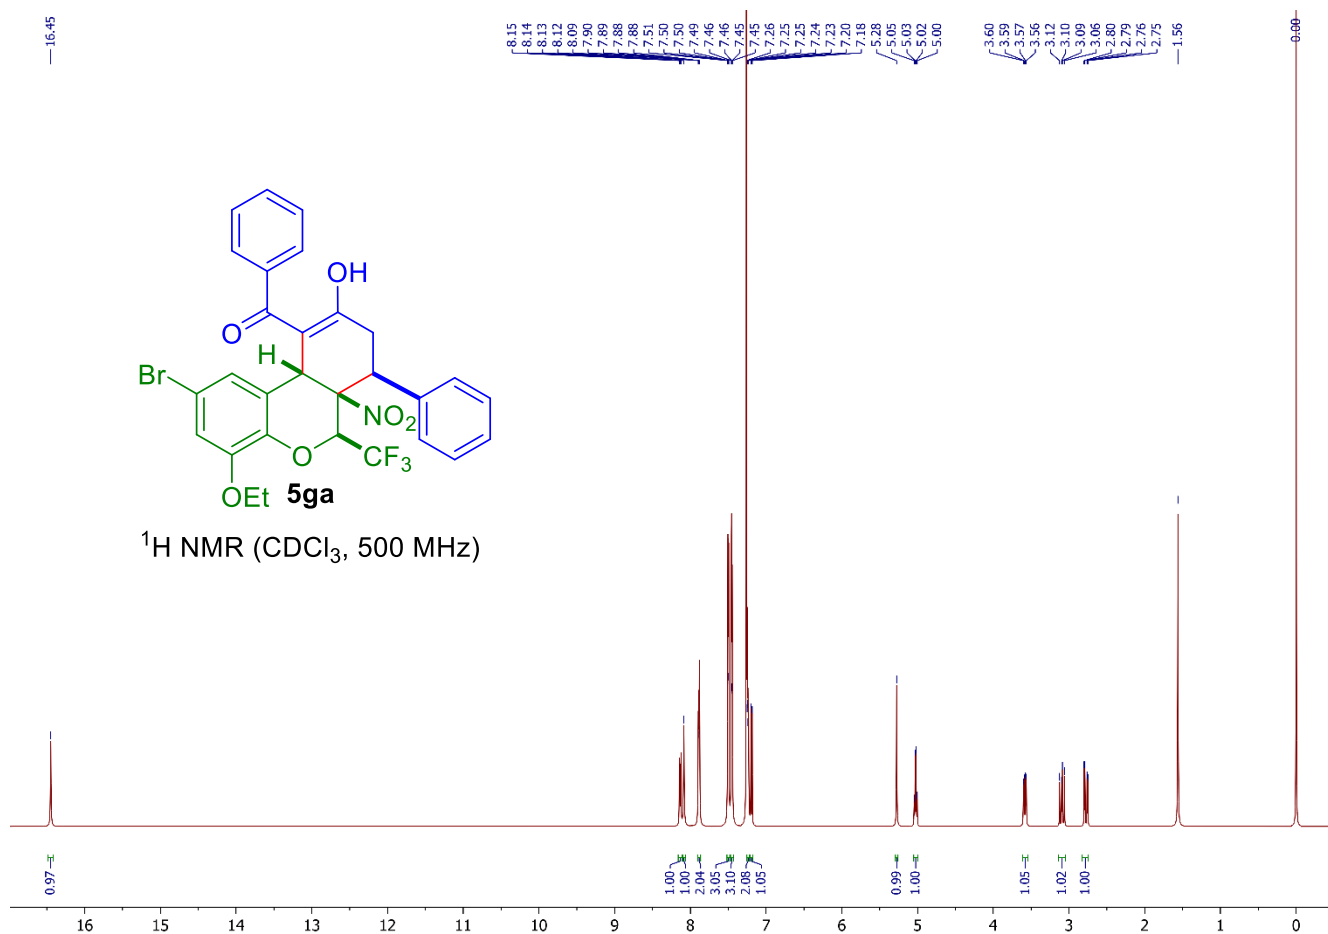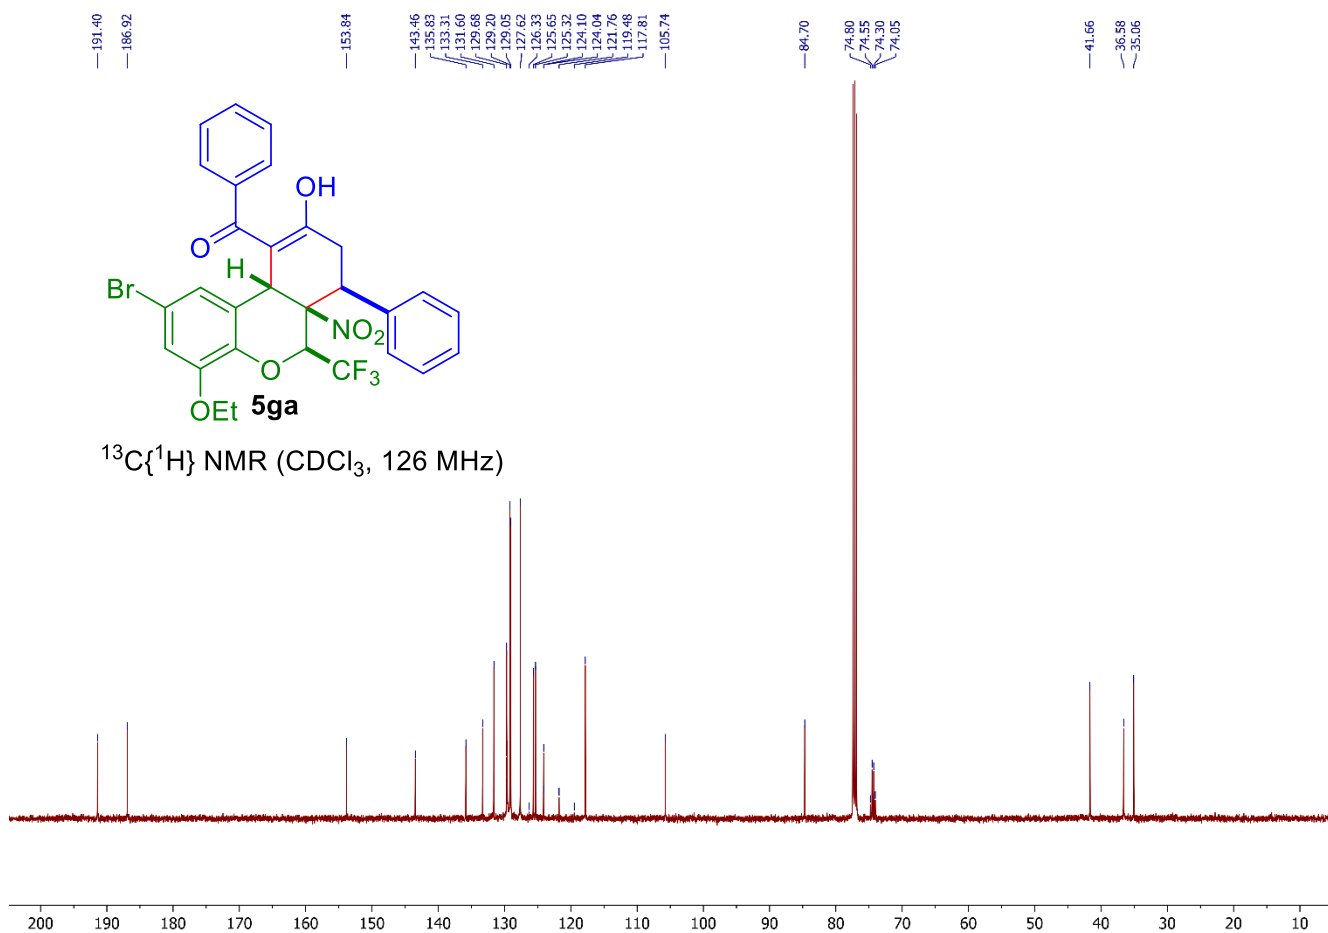

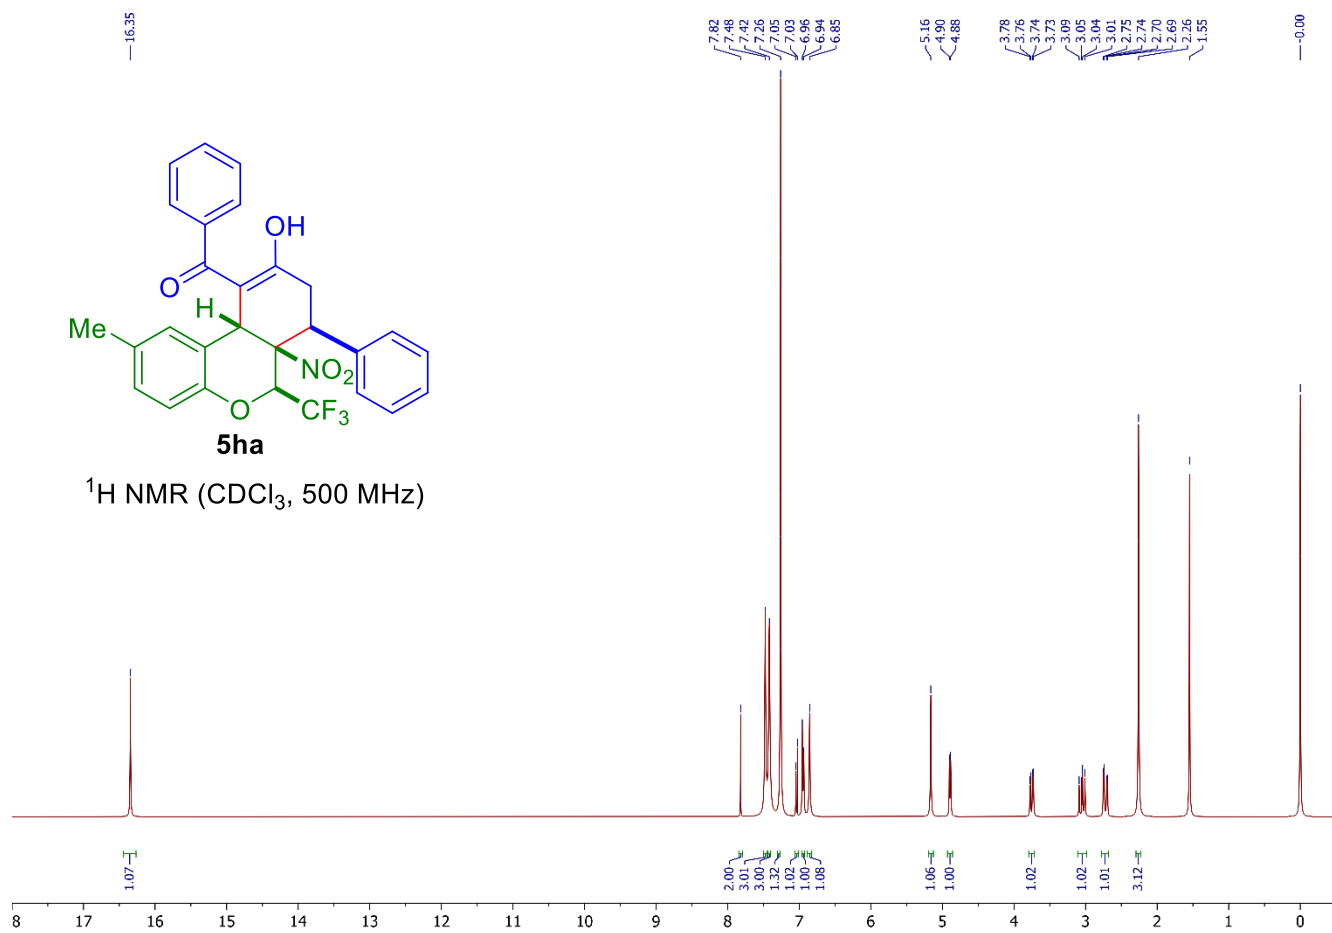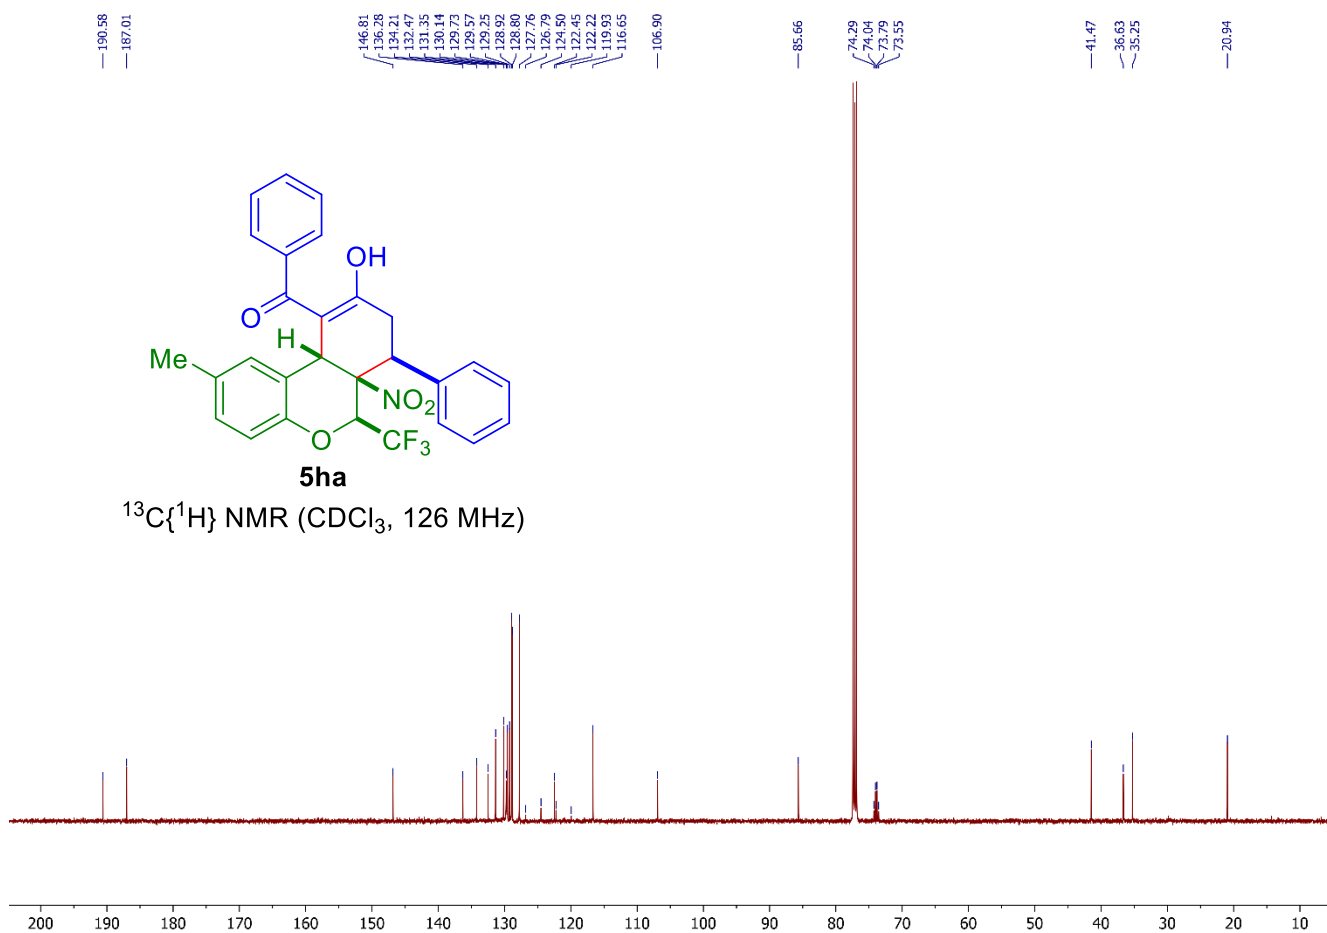

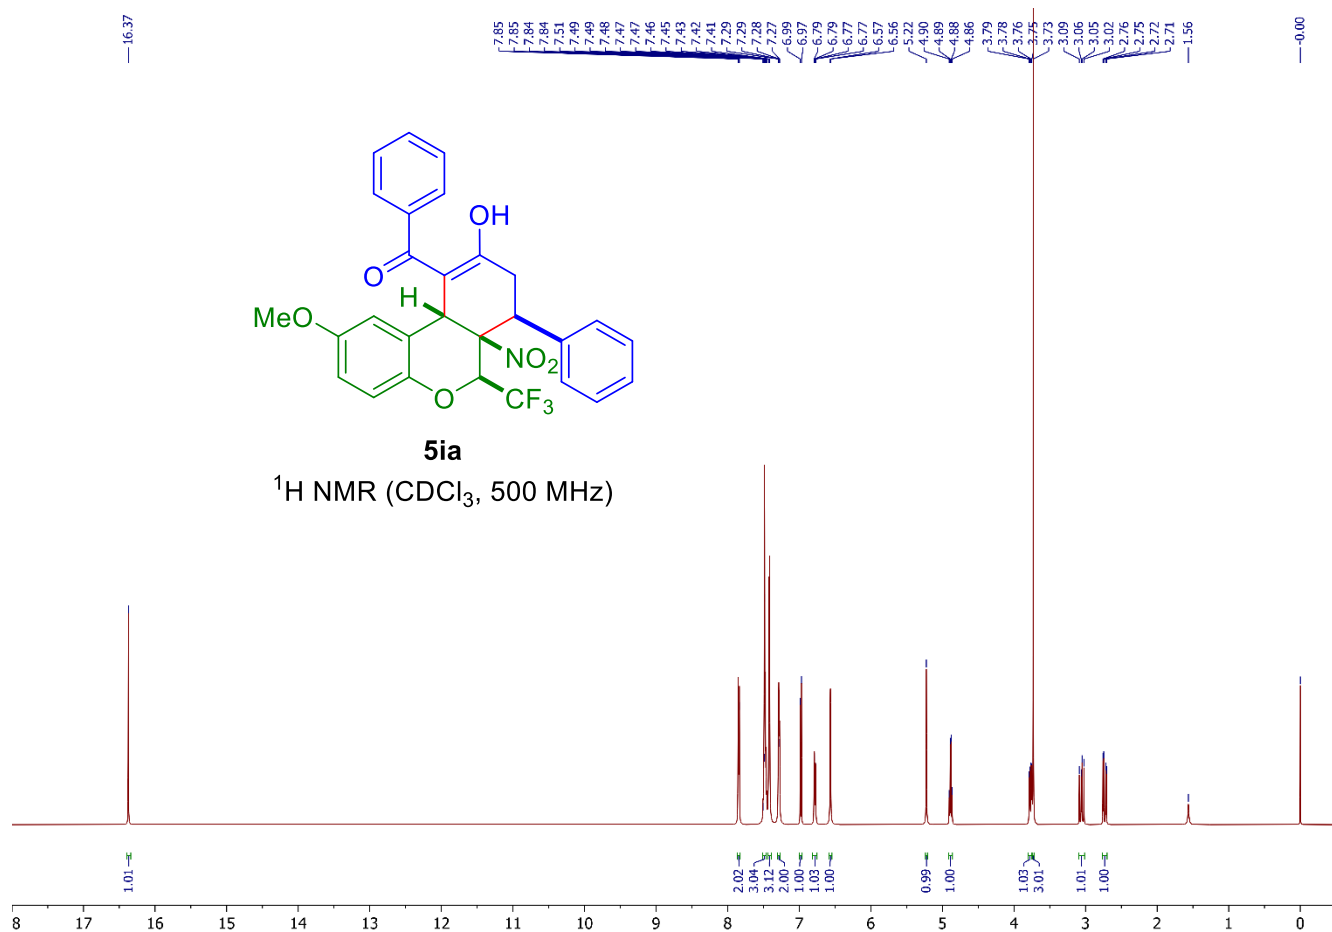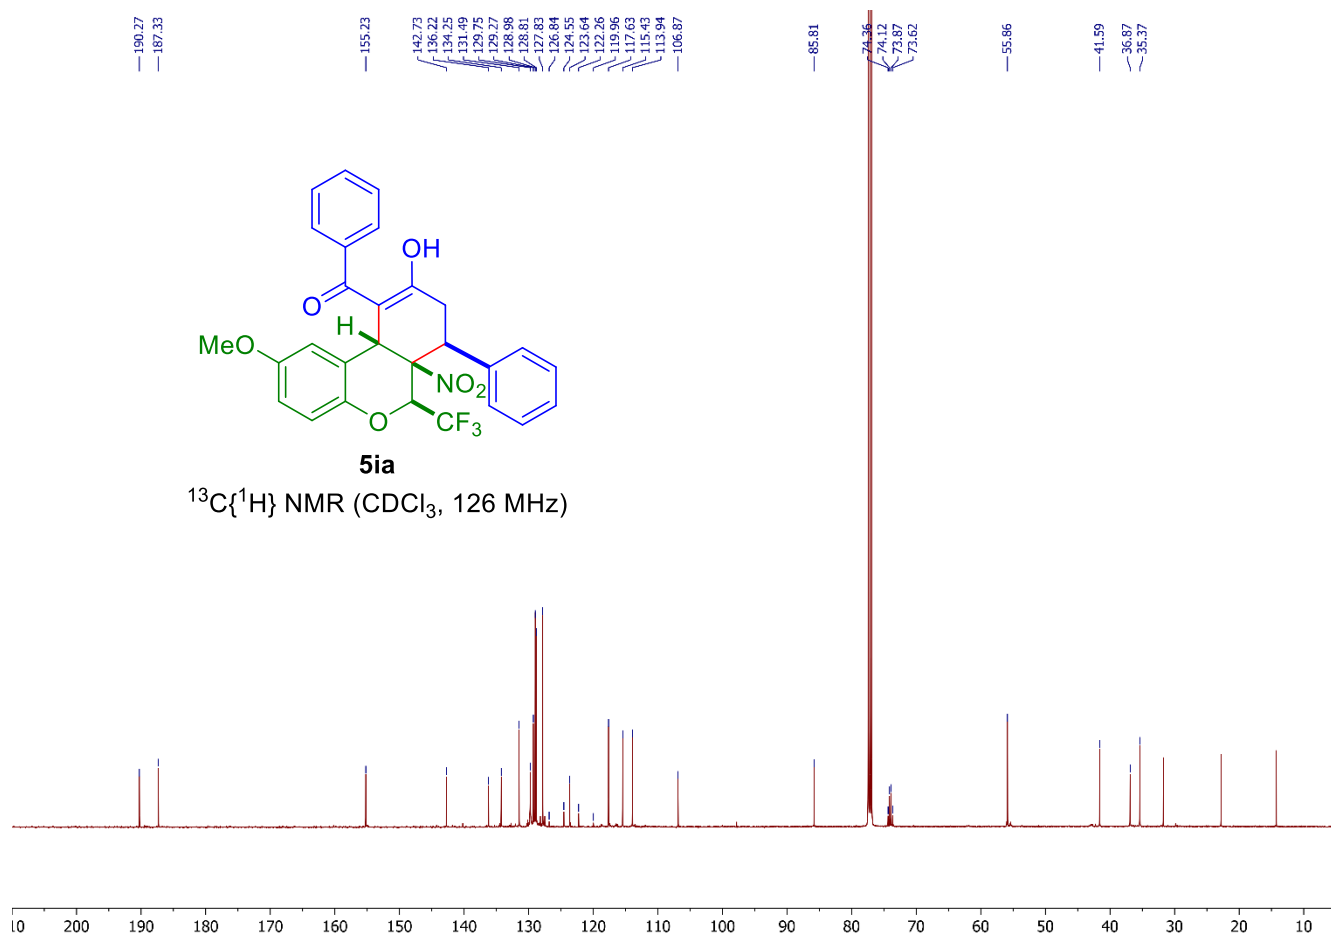

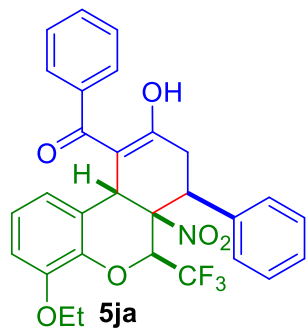

<sup>1</sup>H NMR (CDCl<sub>3</sub>, 500 MHz)

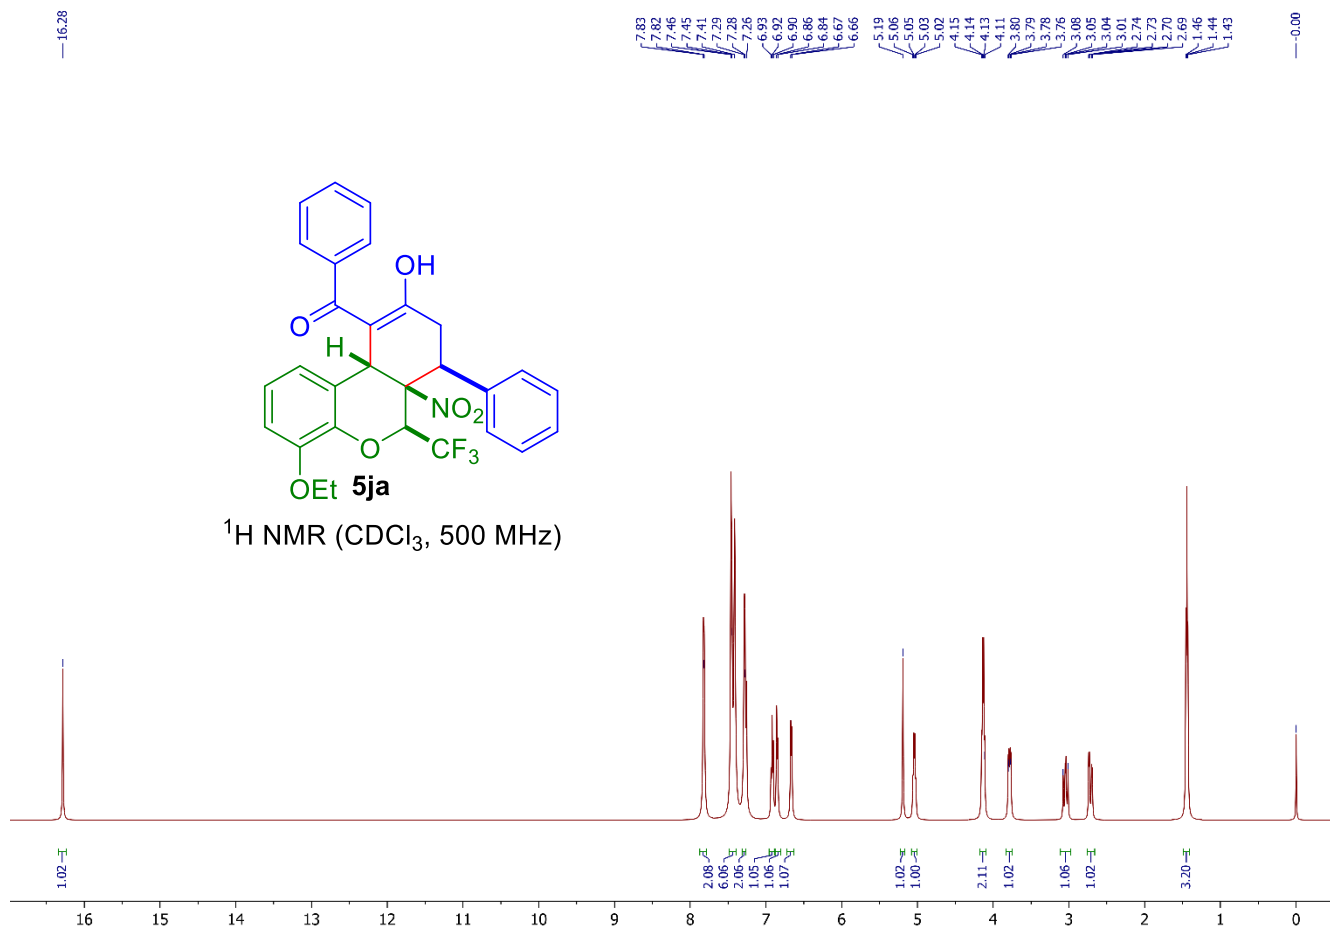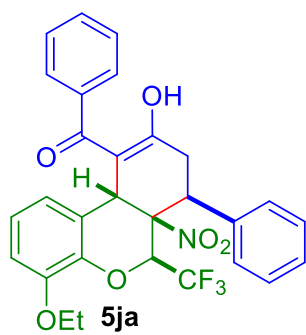

<sup>13</sup>C{<sup>1</sup>H} NMR (CDCl<sub>3</sub>, 126 MHz)

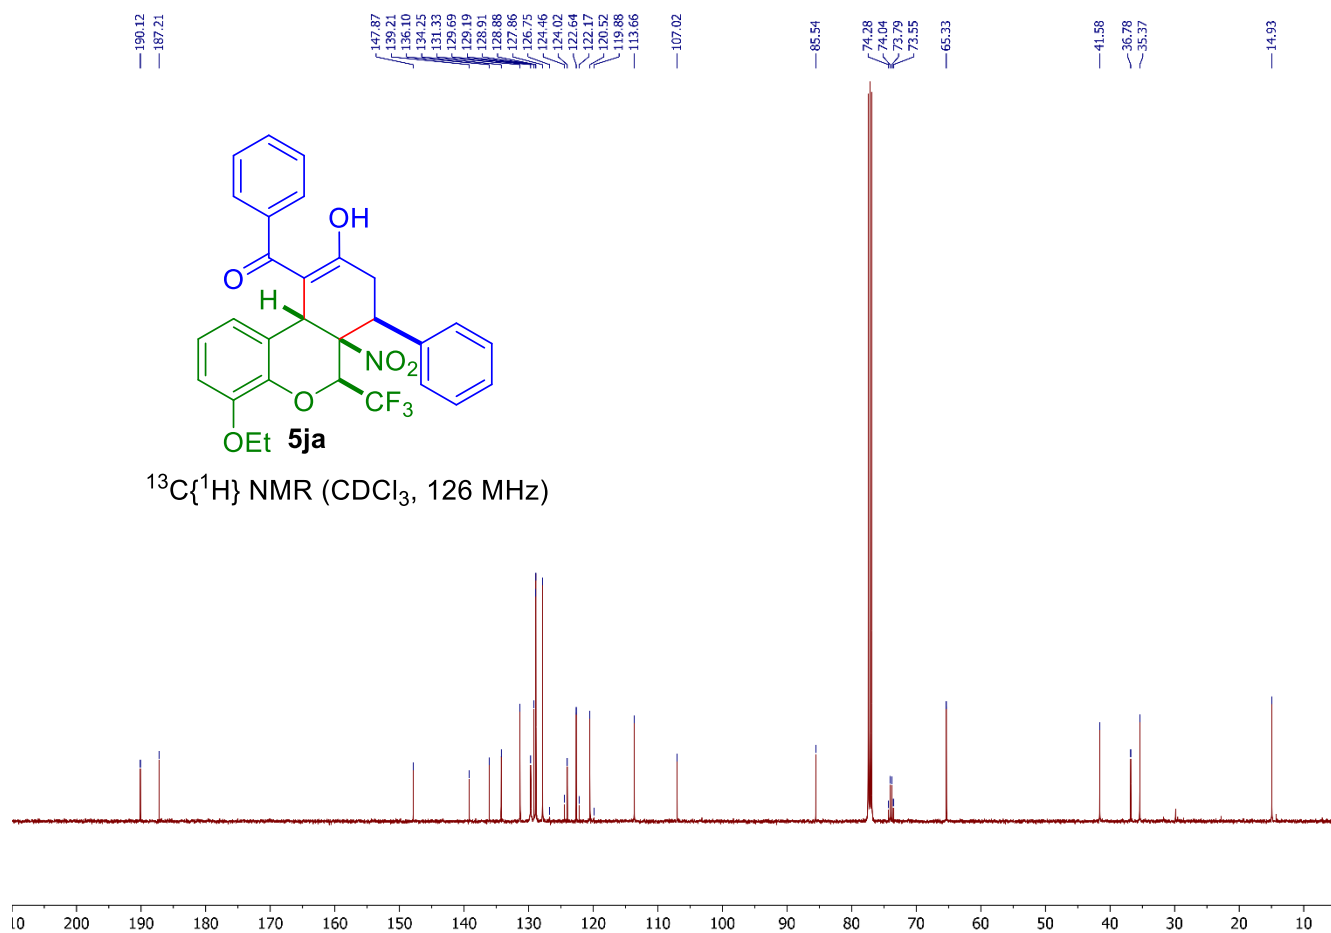



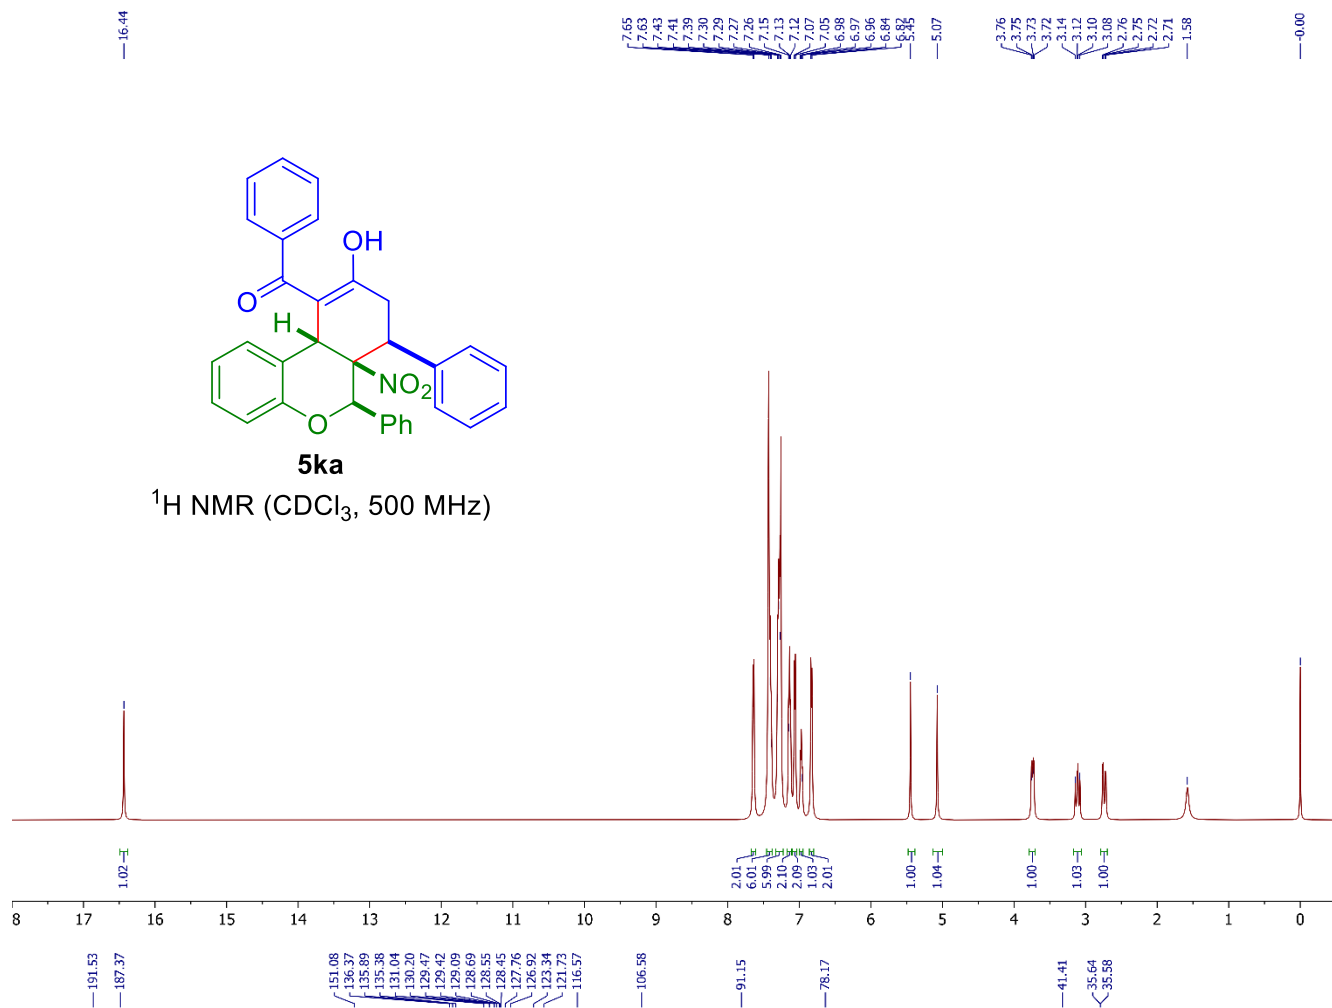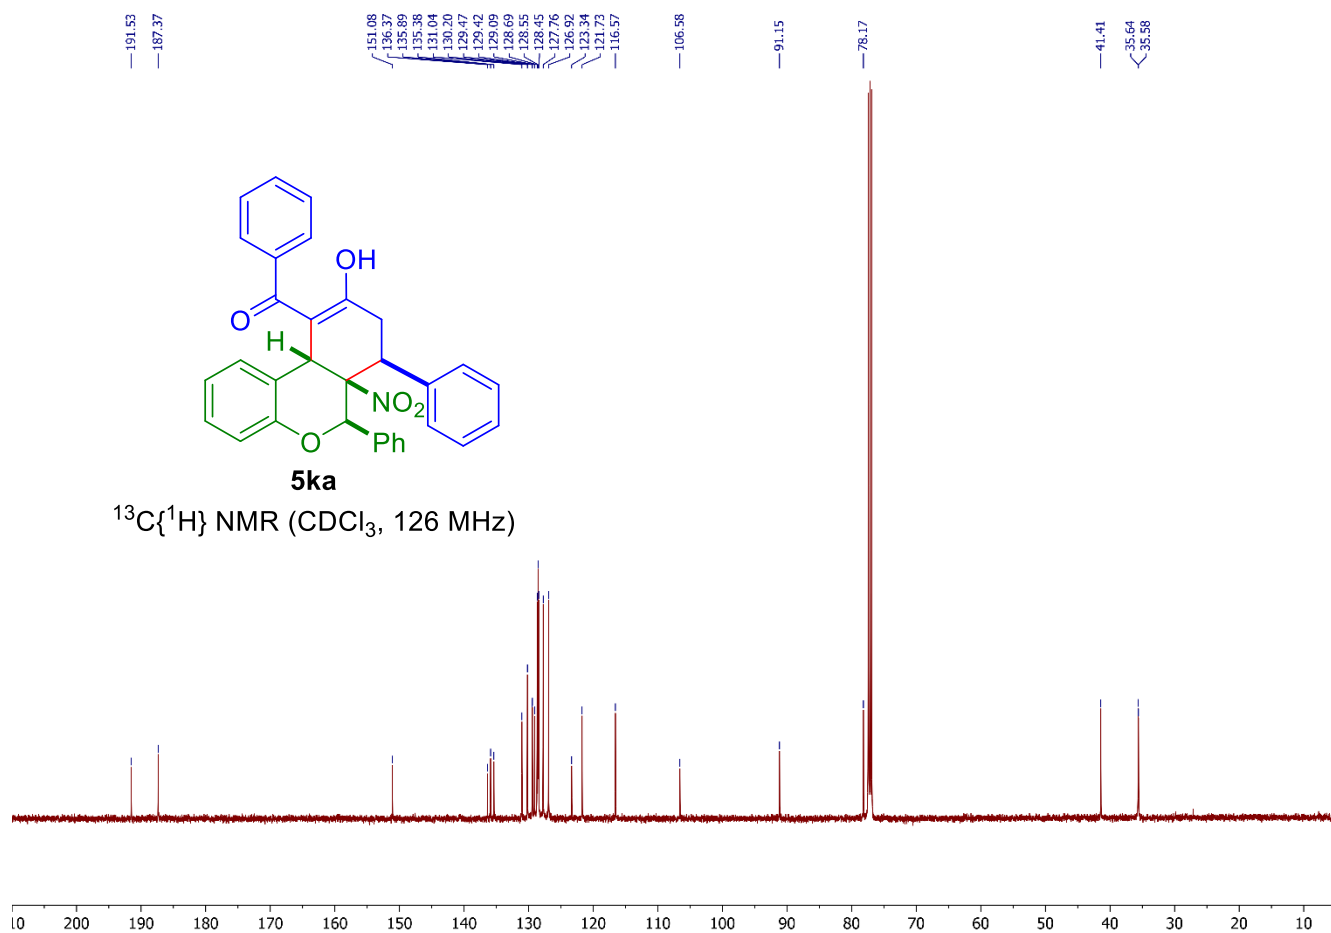

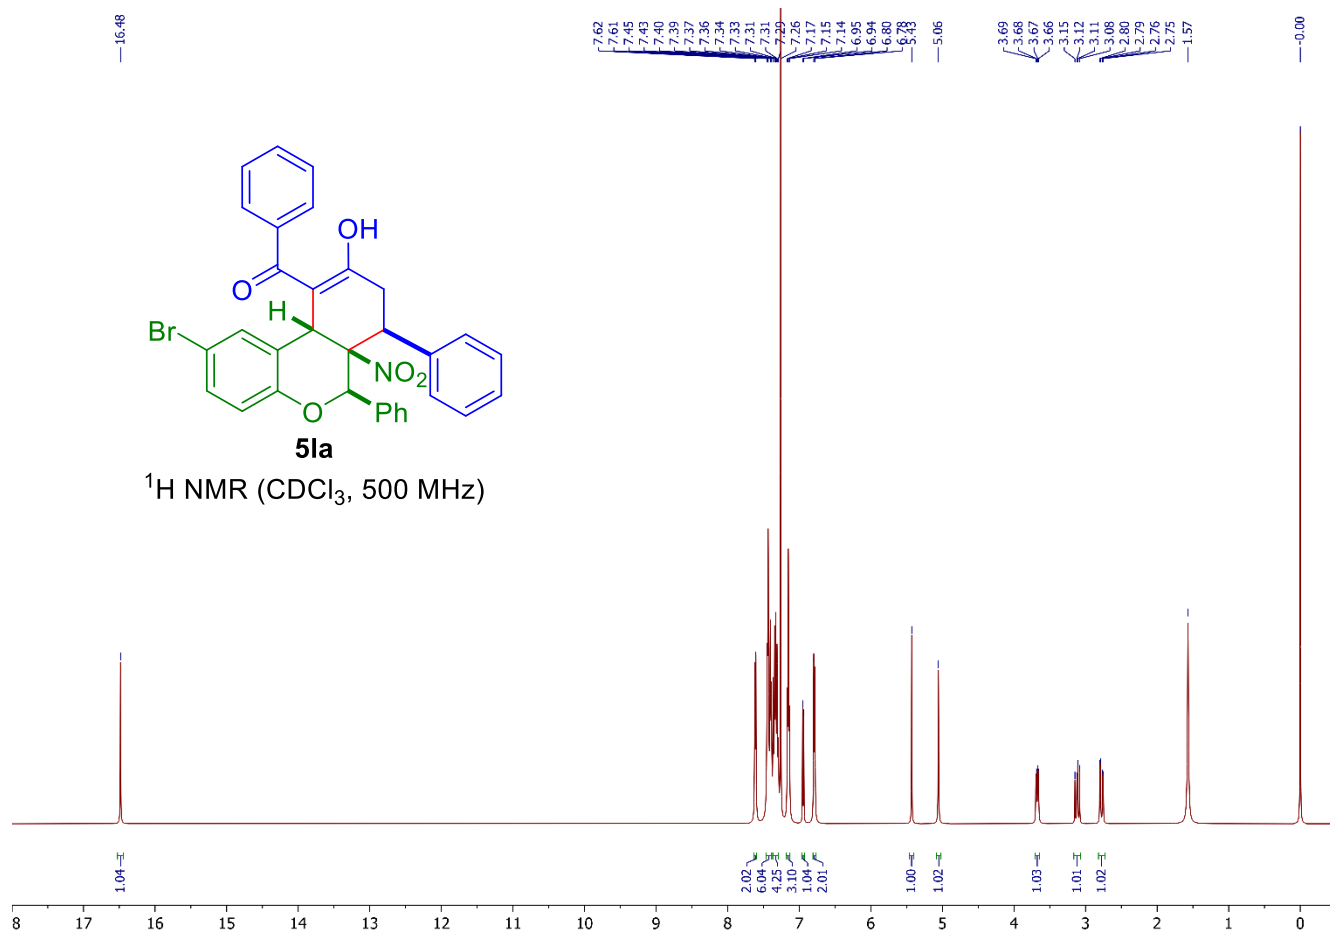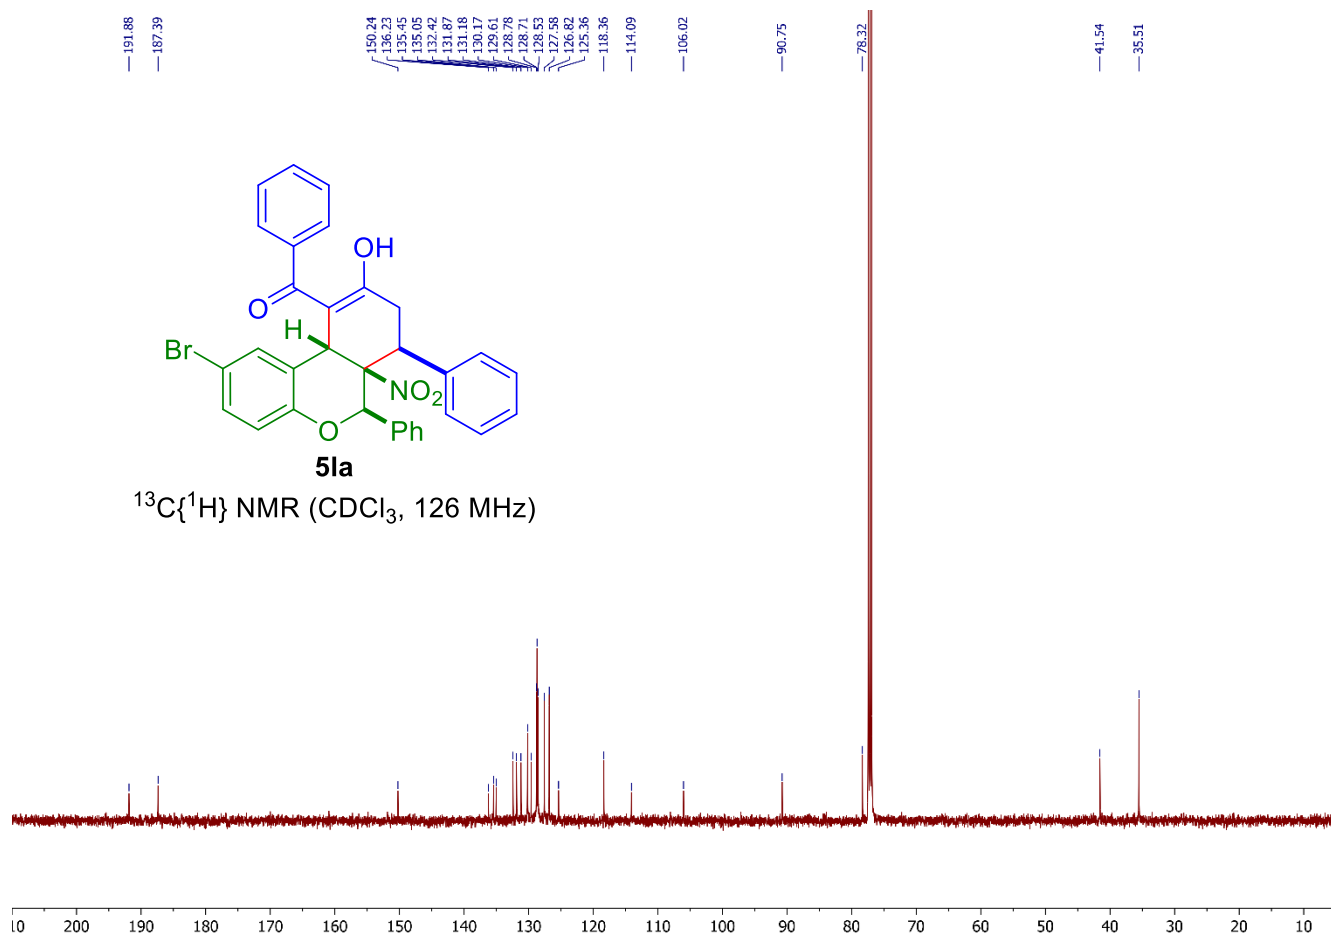

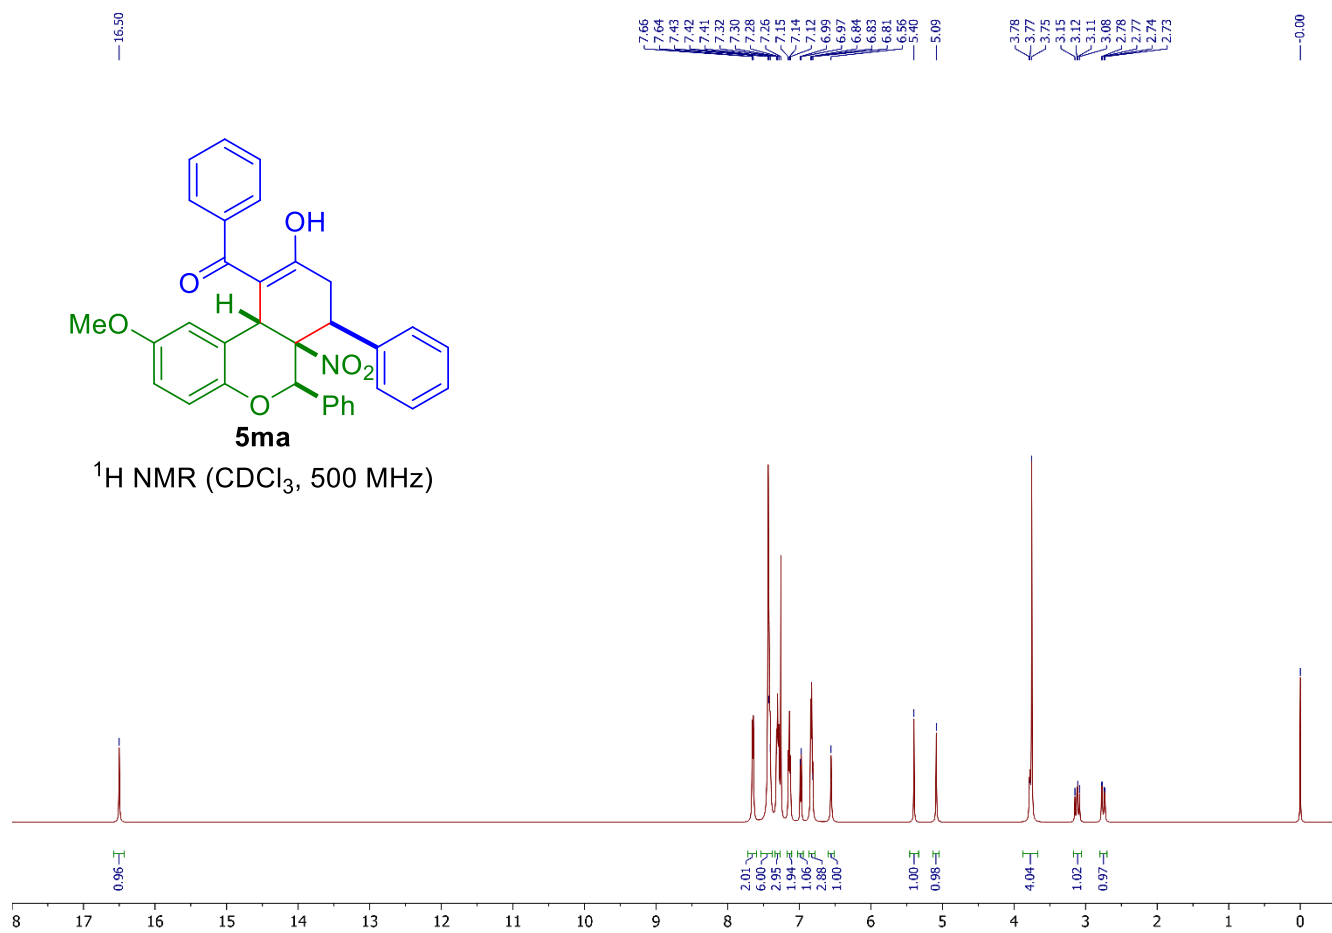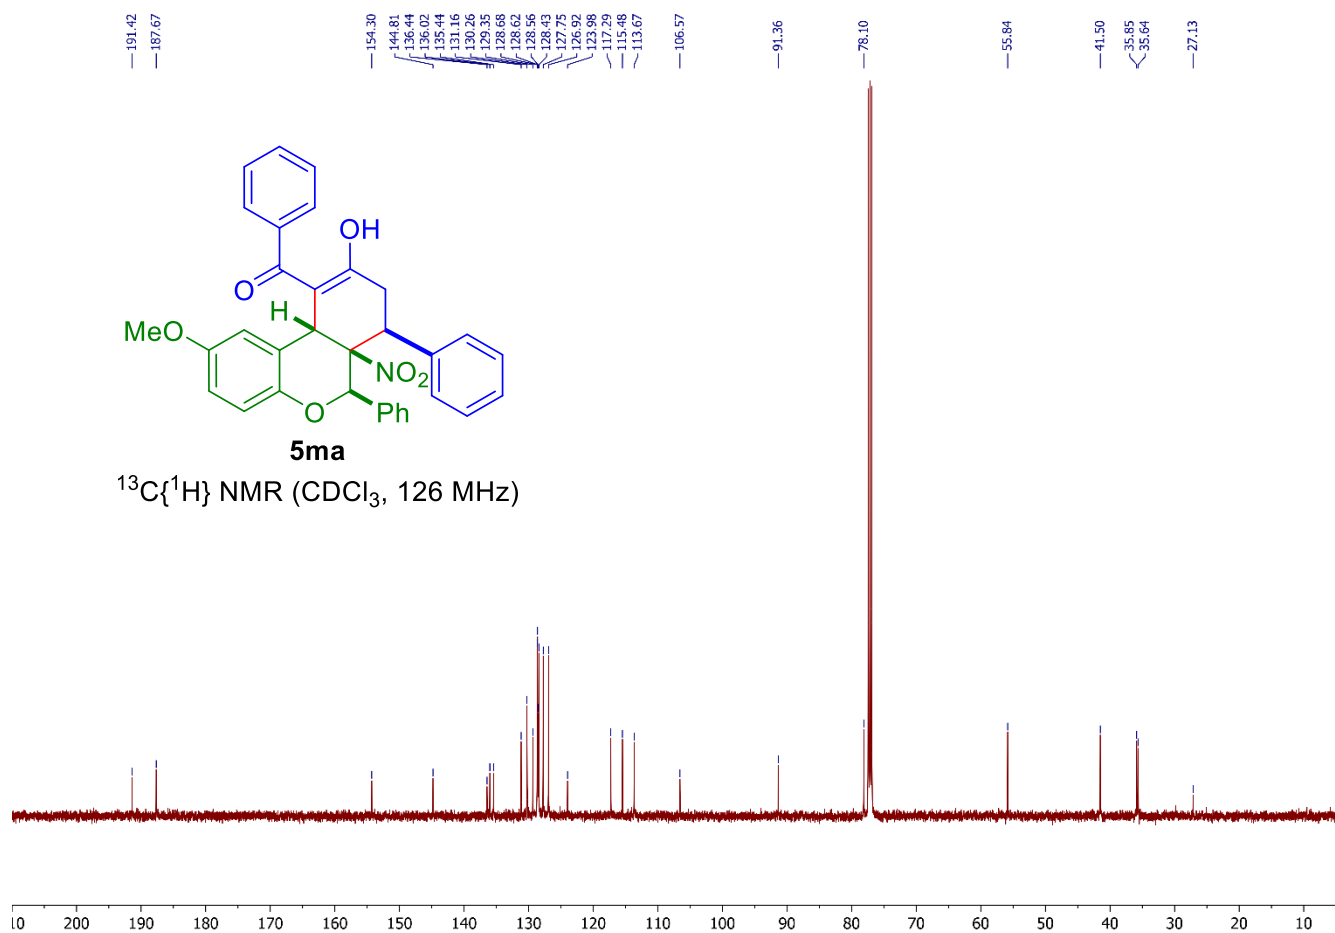

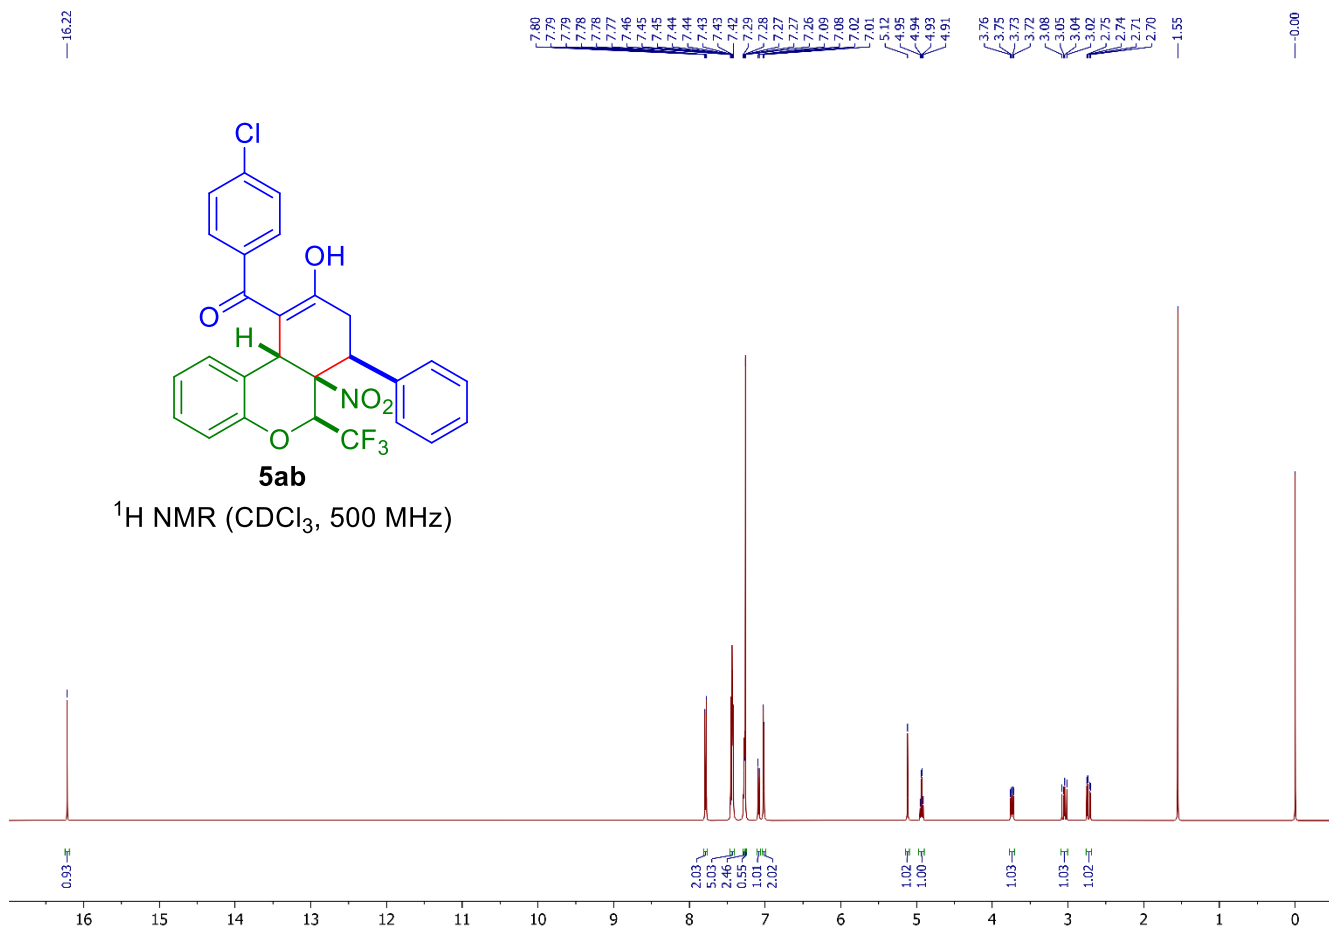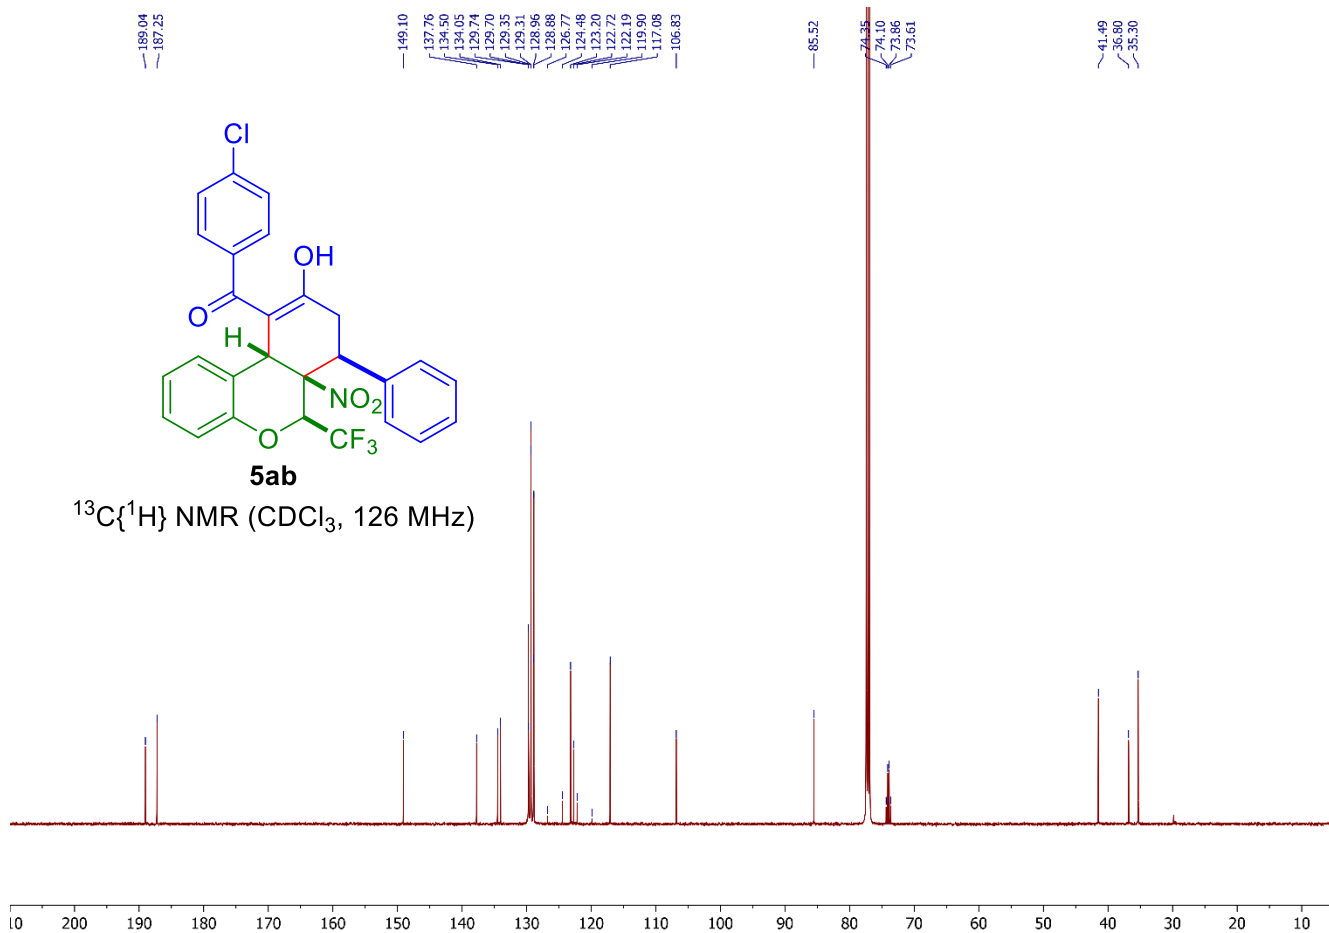

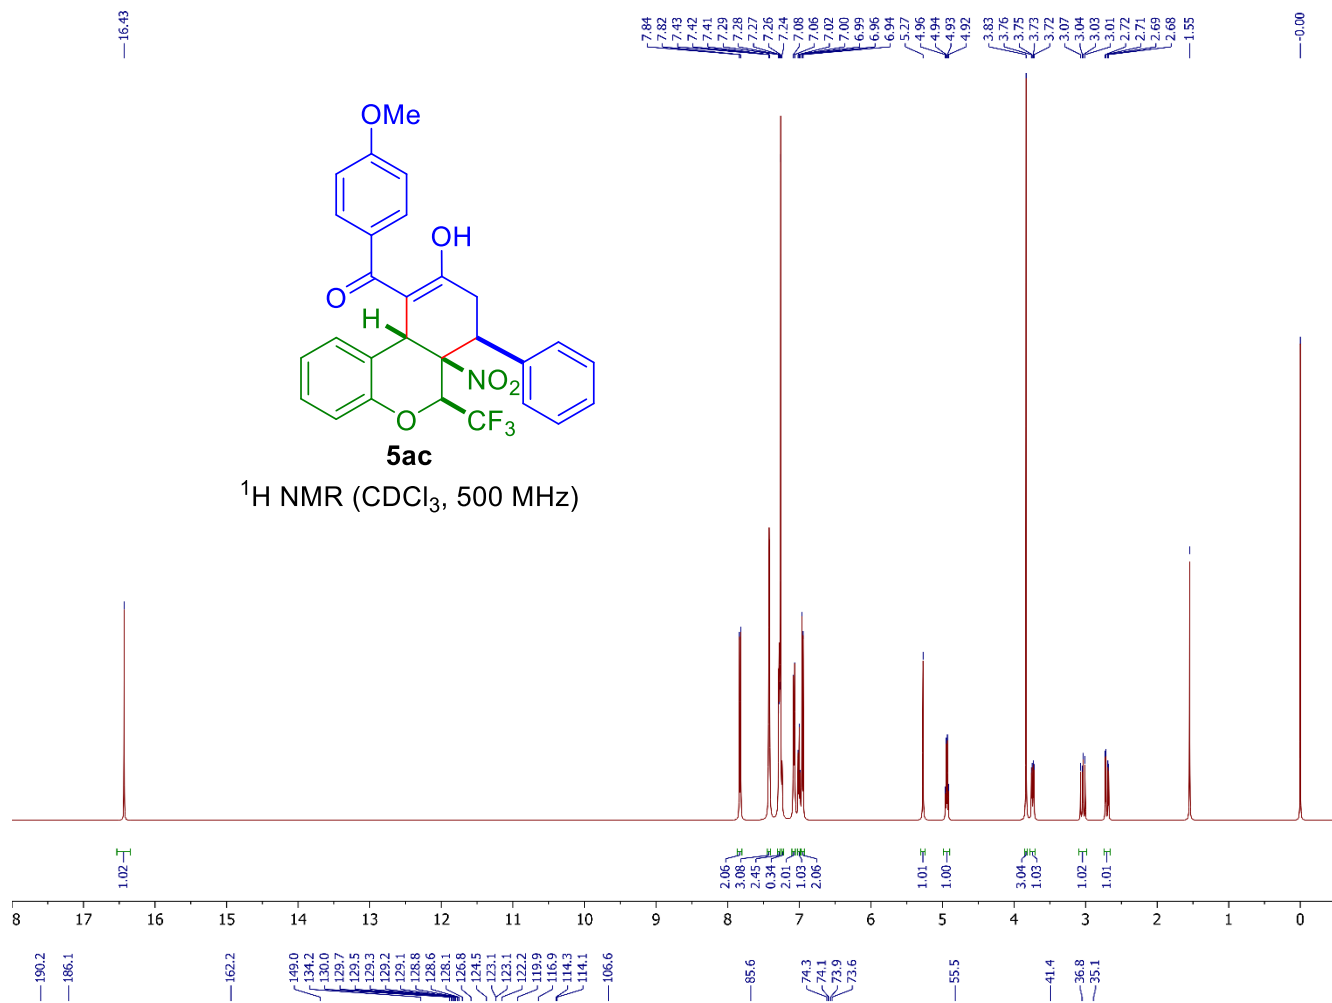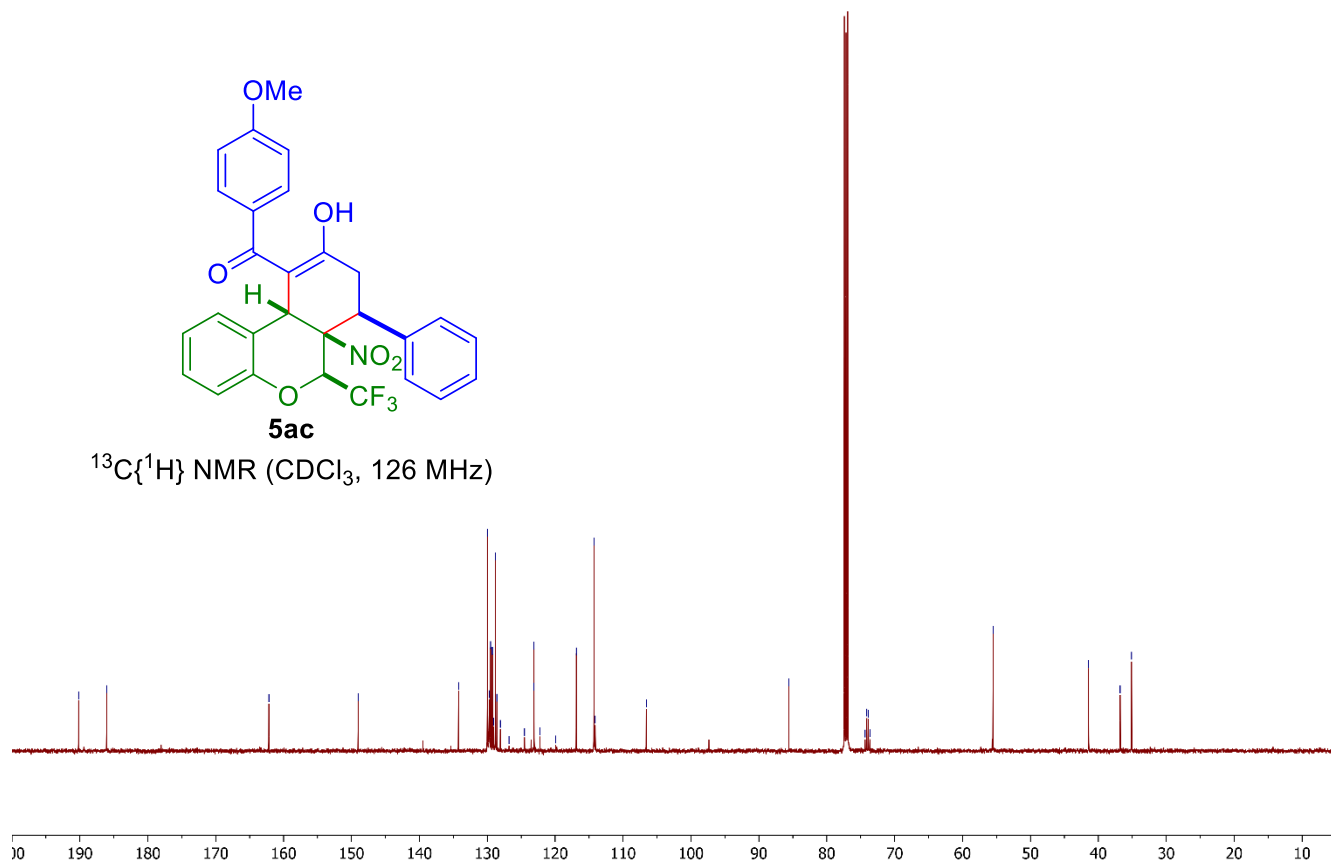

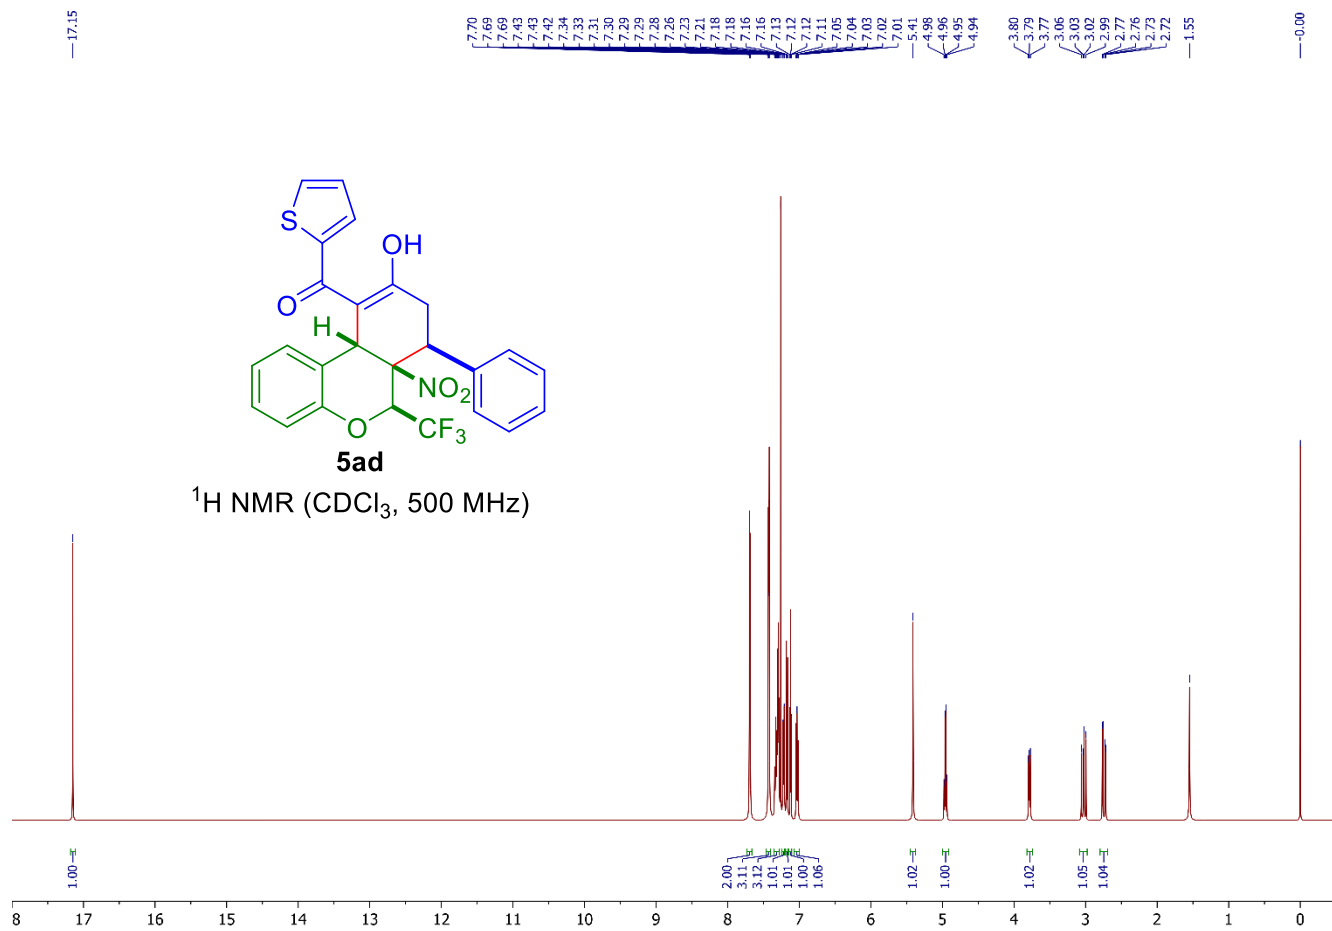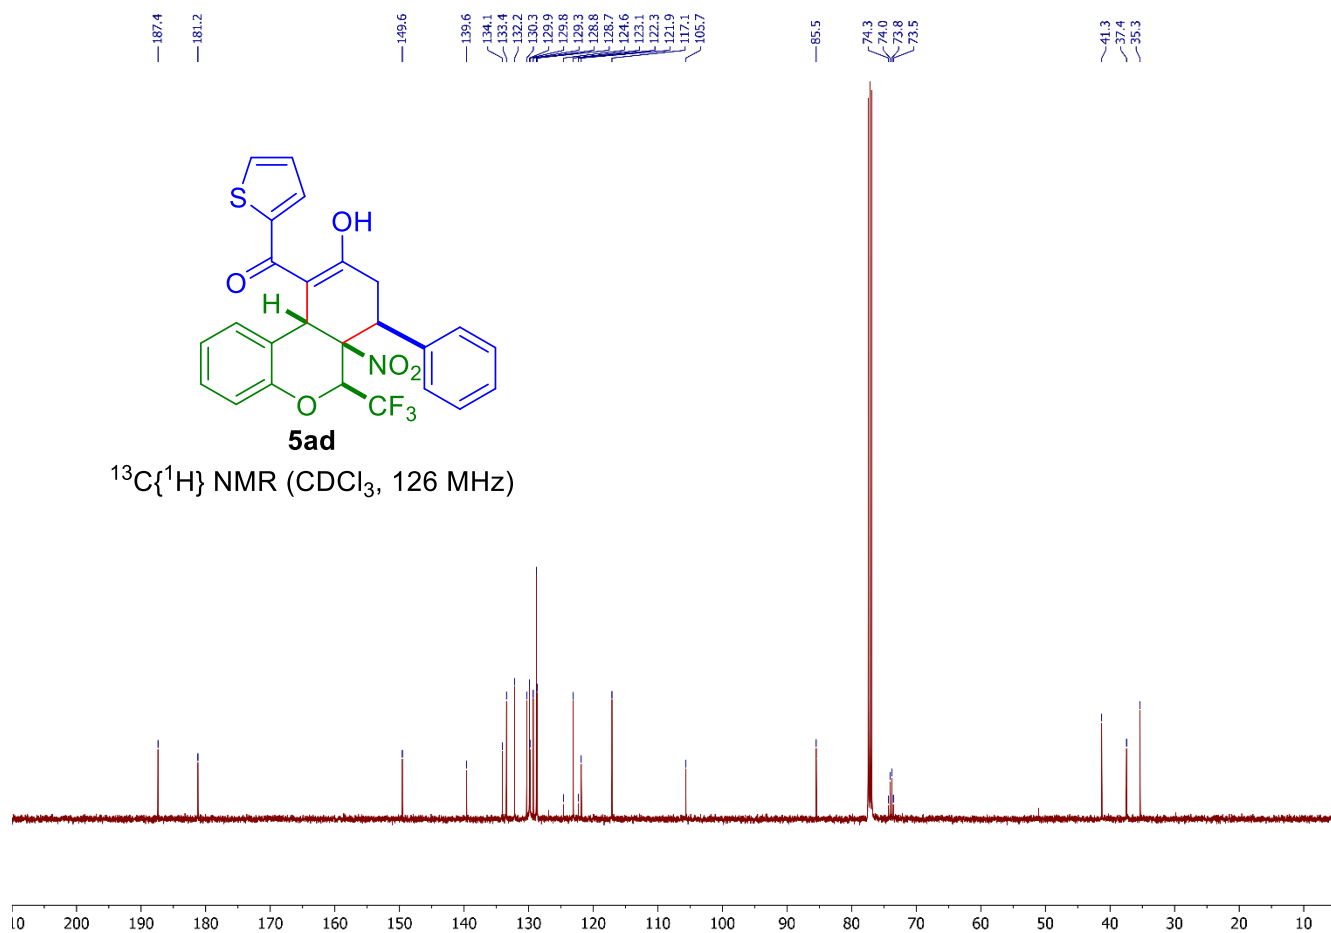

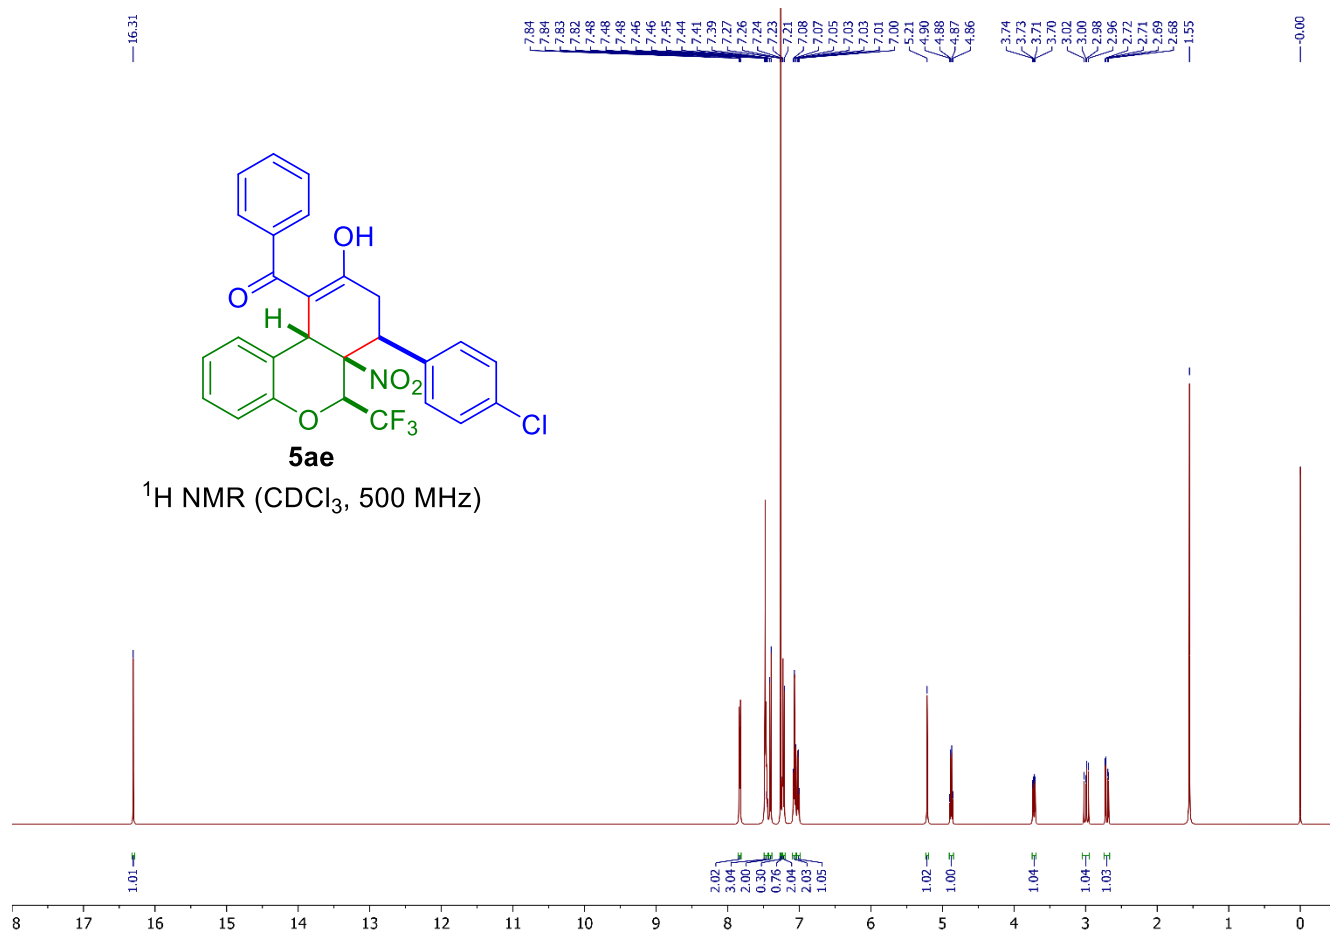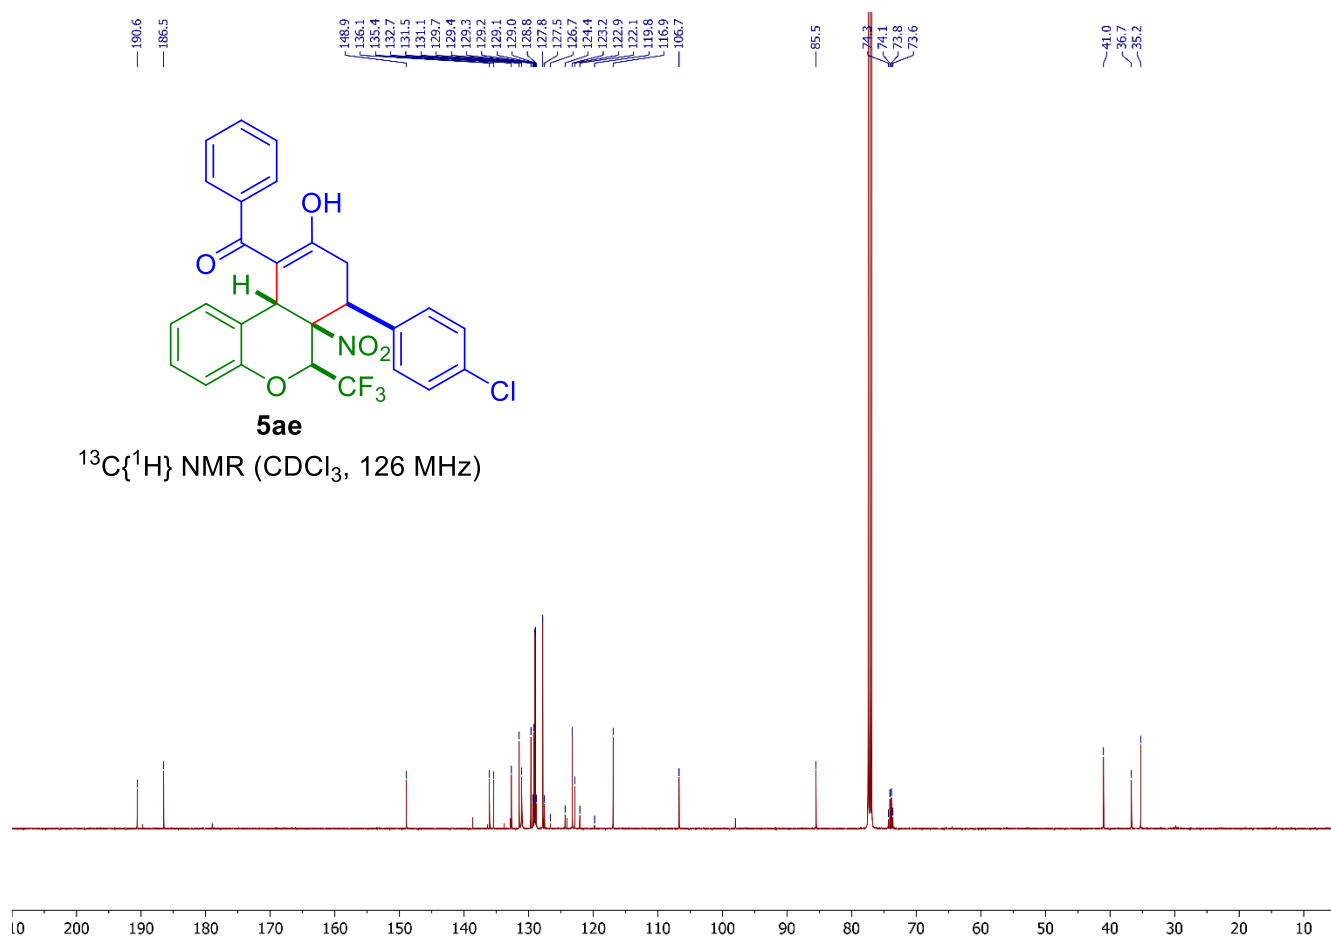

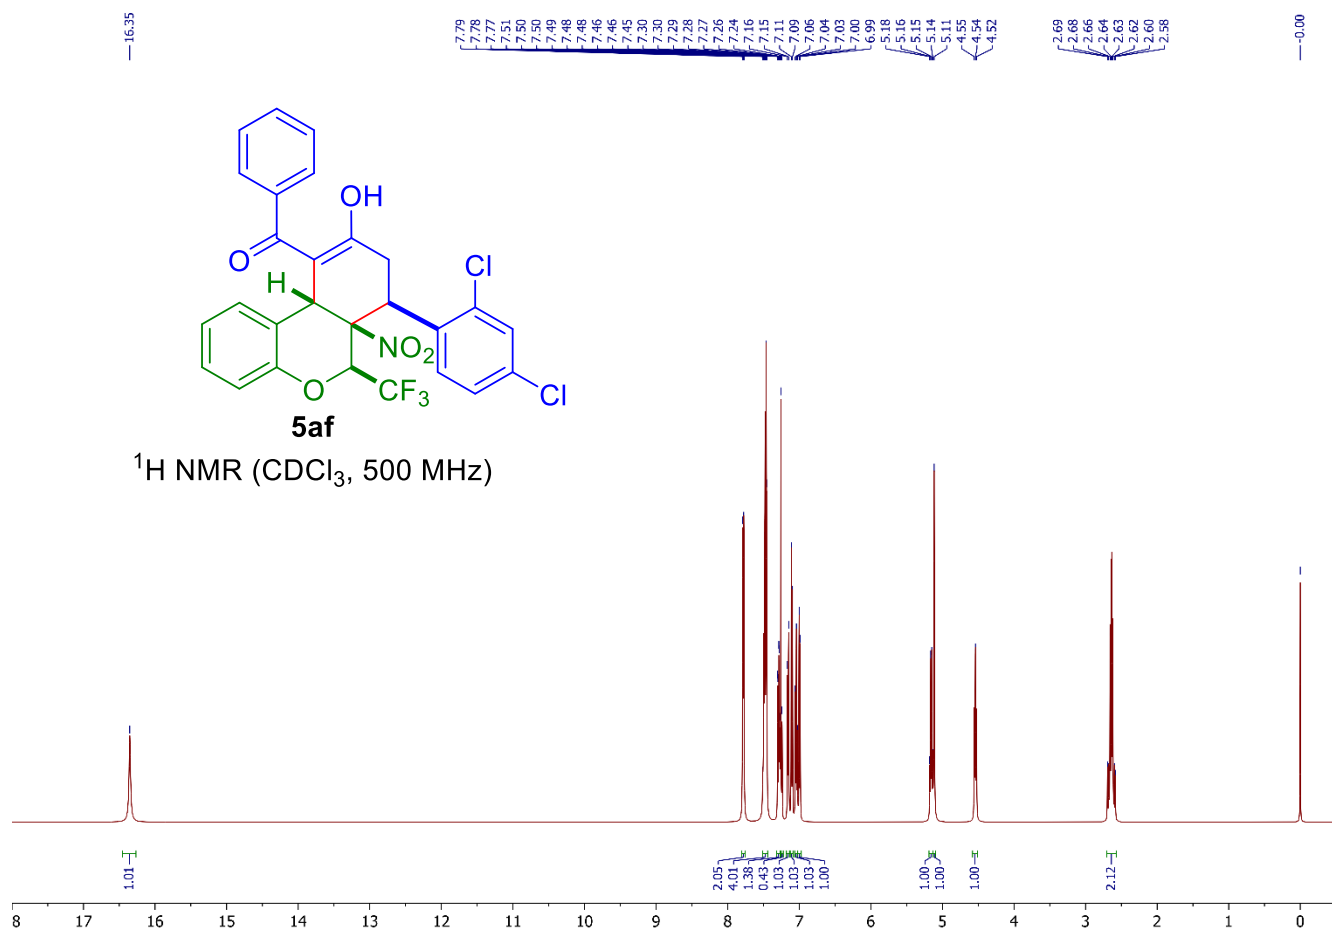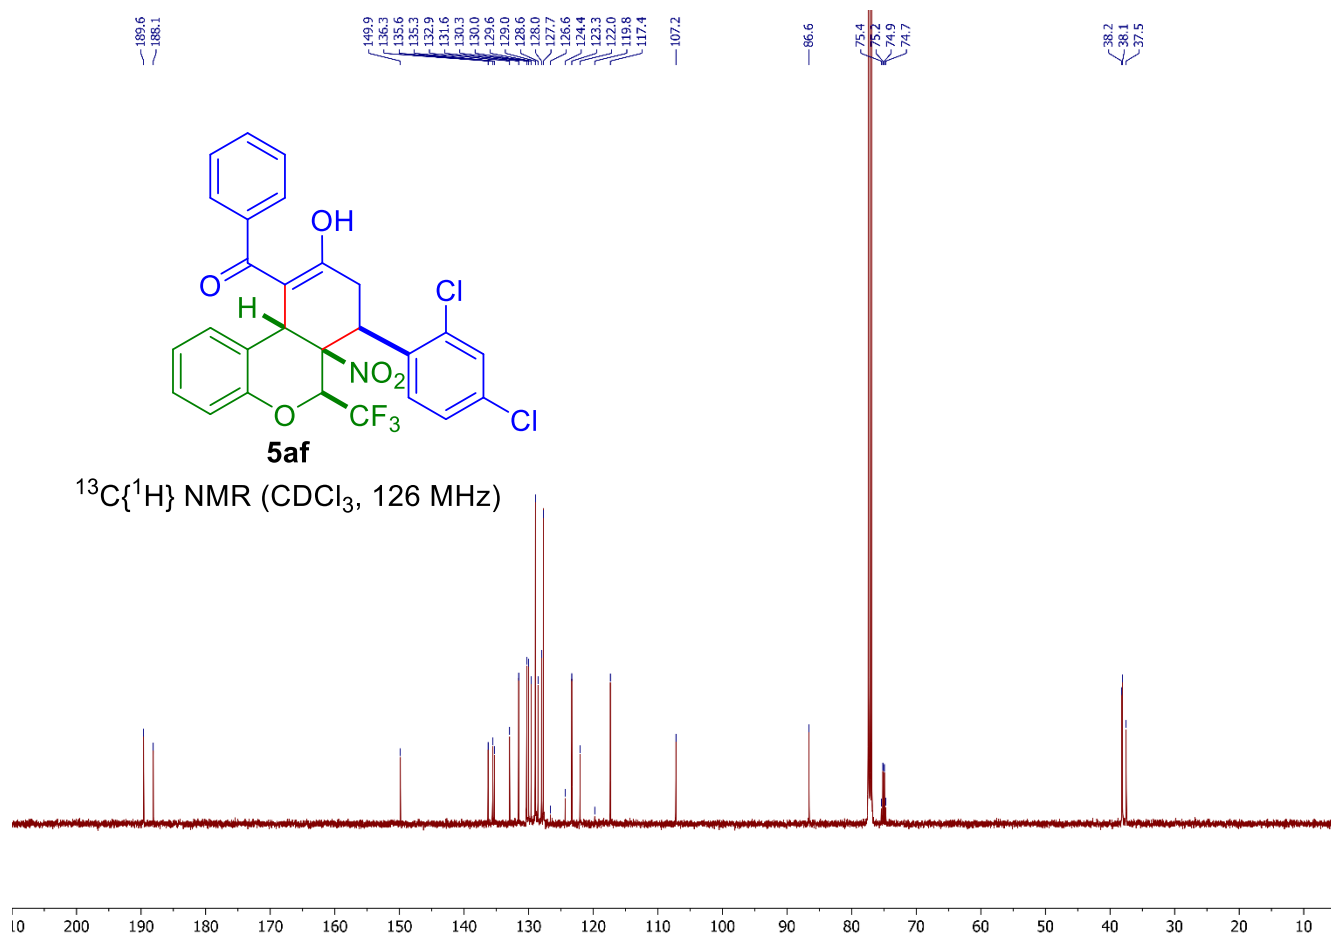



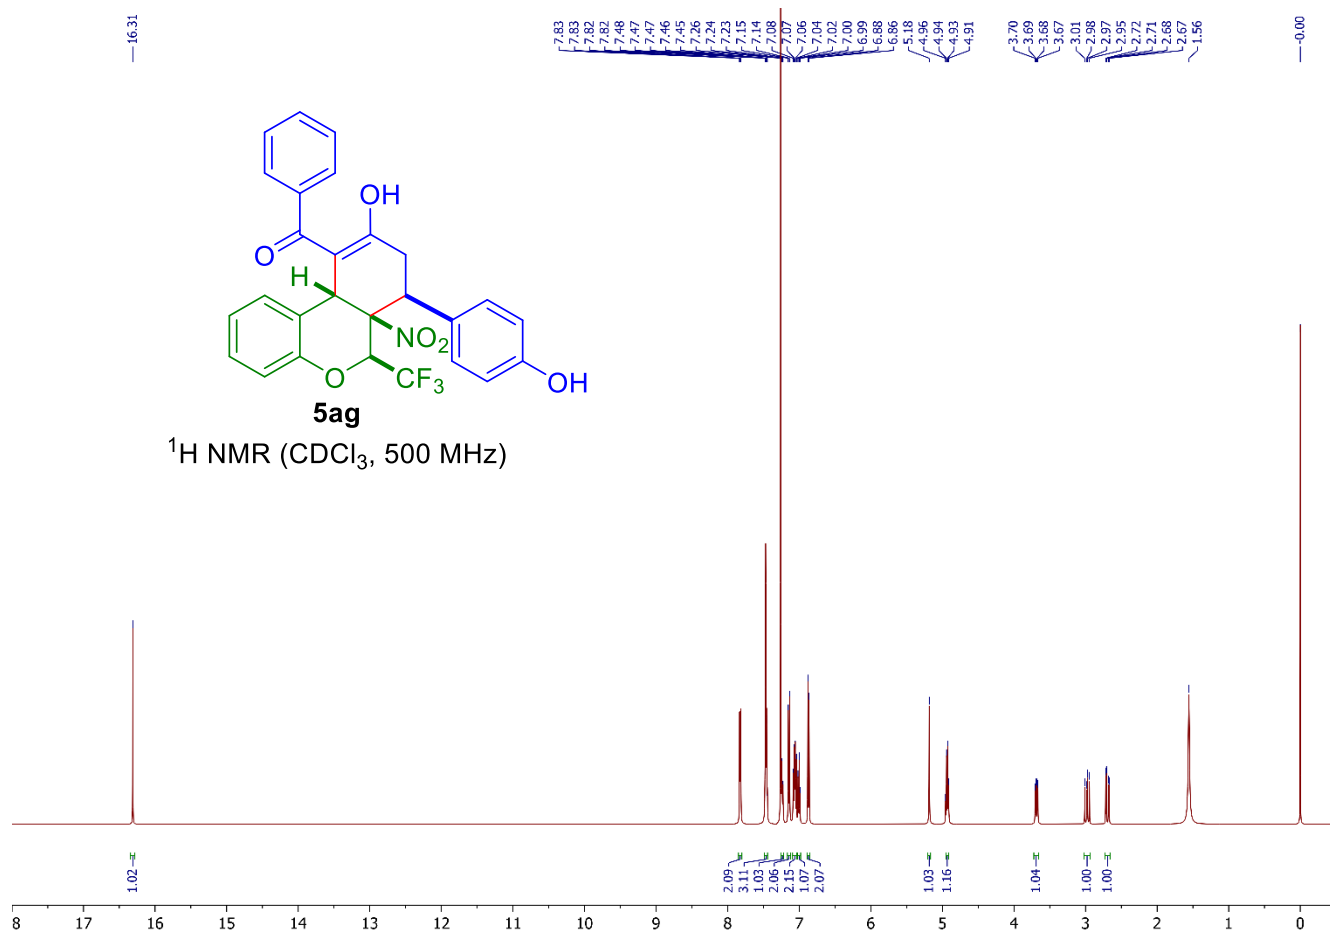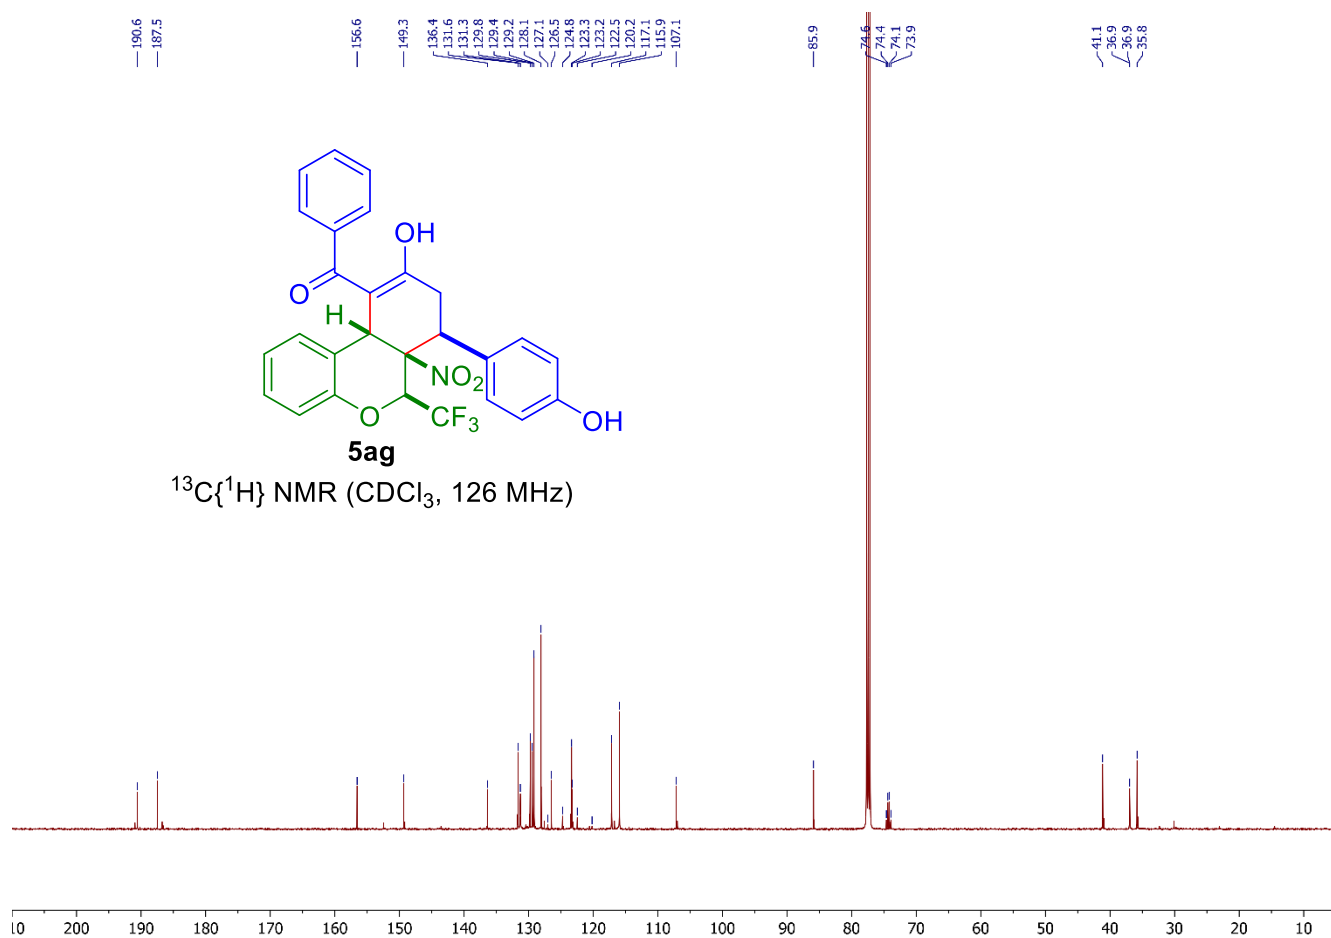

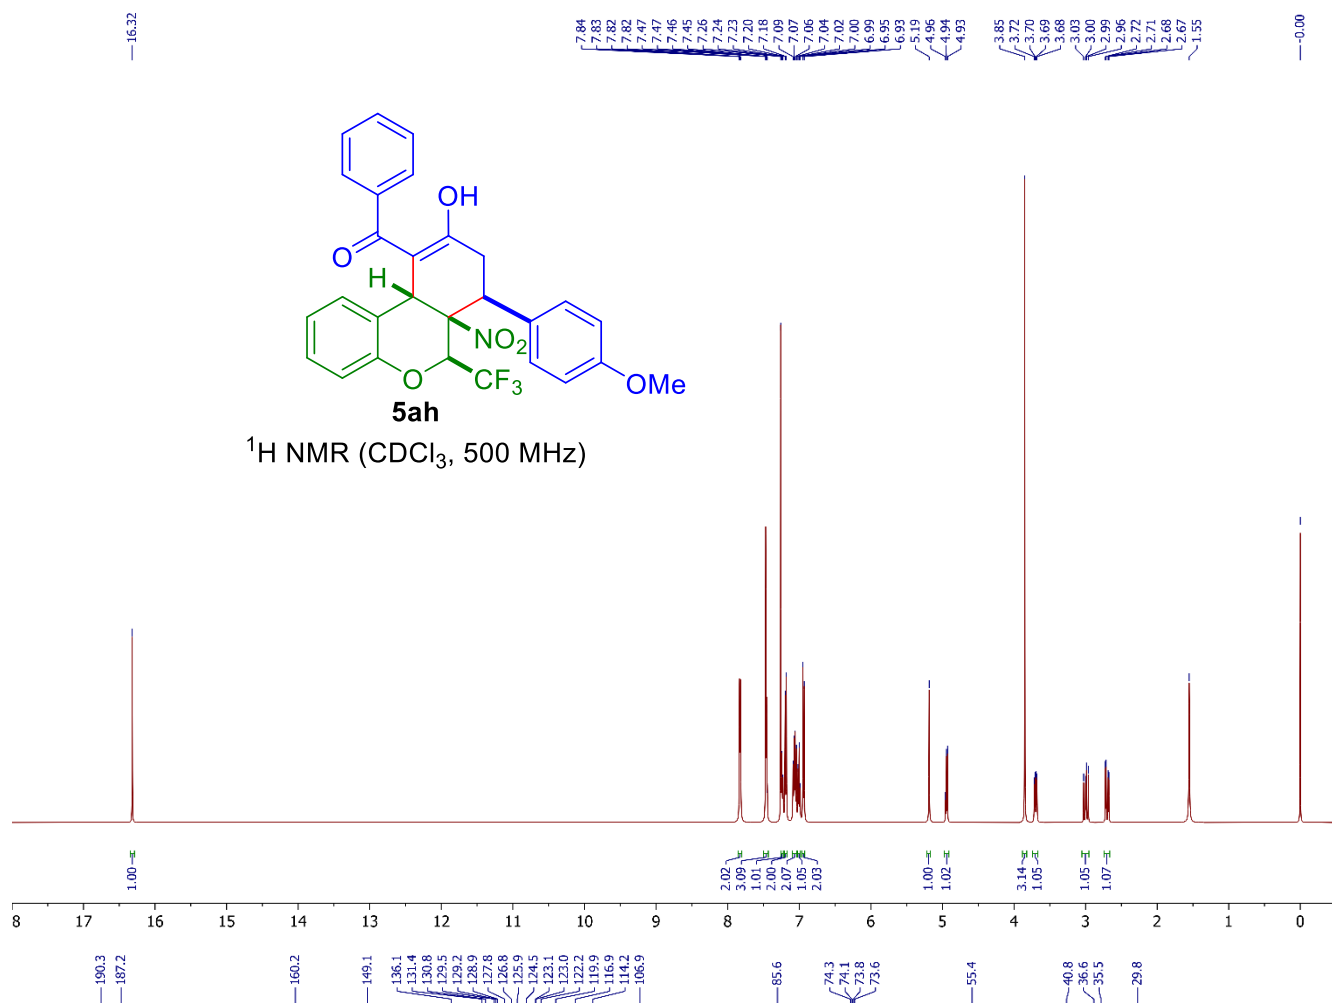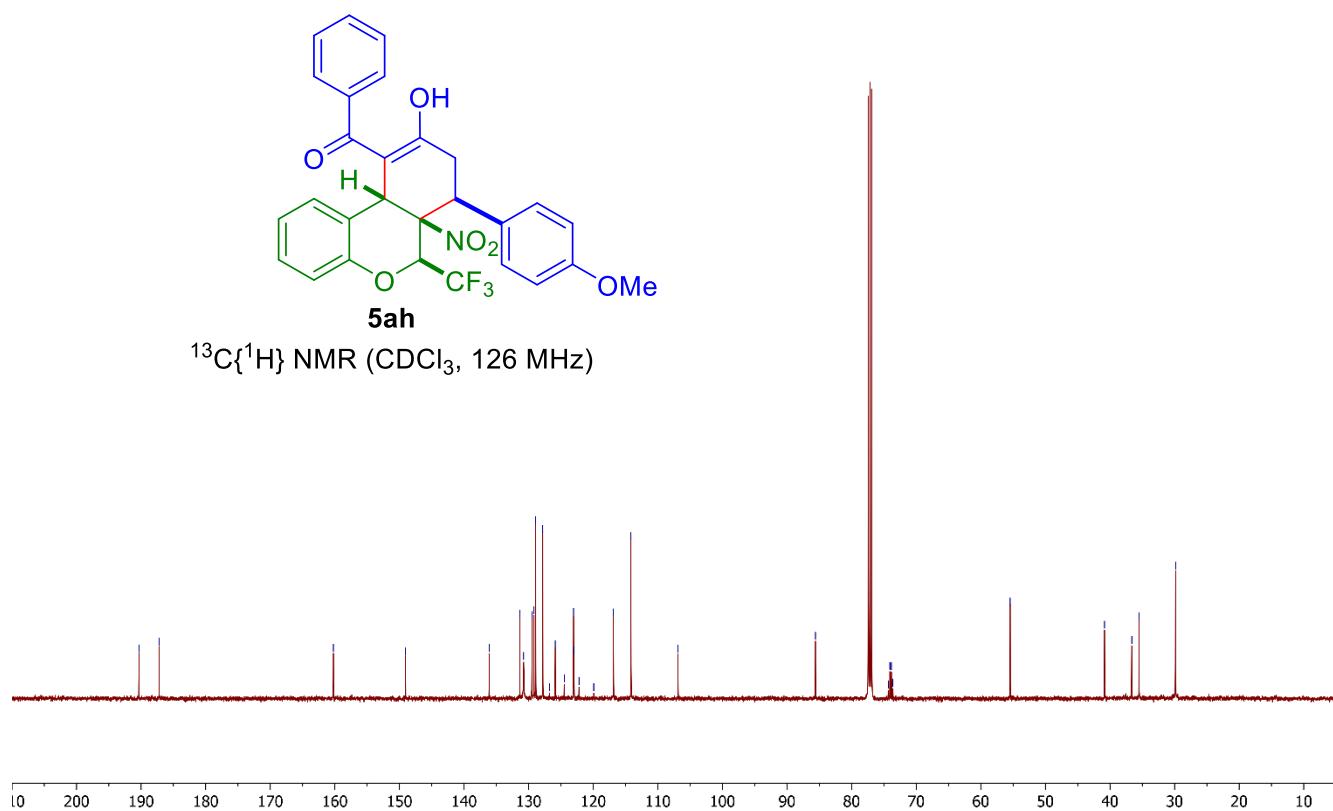

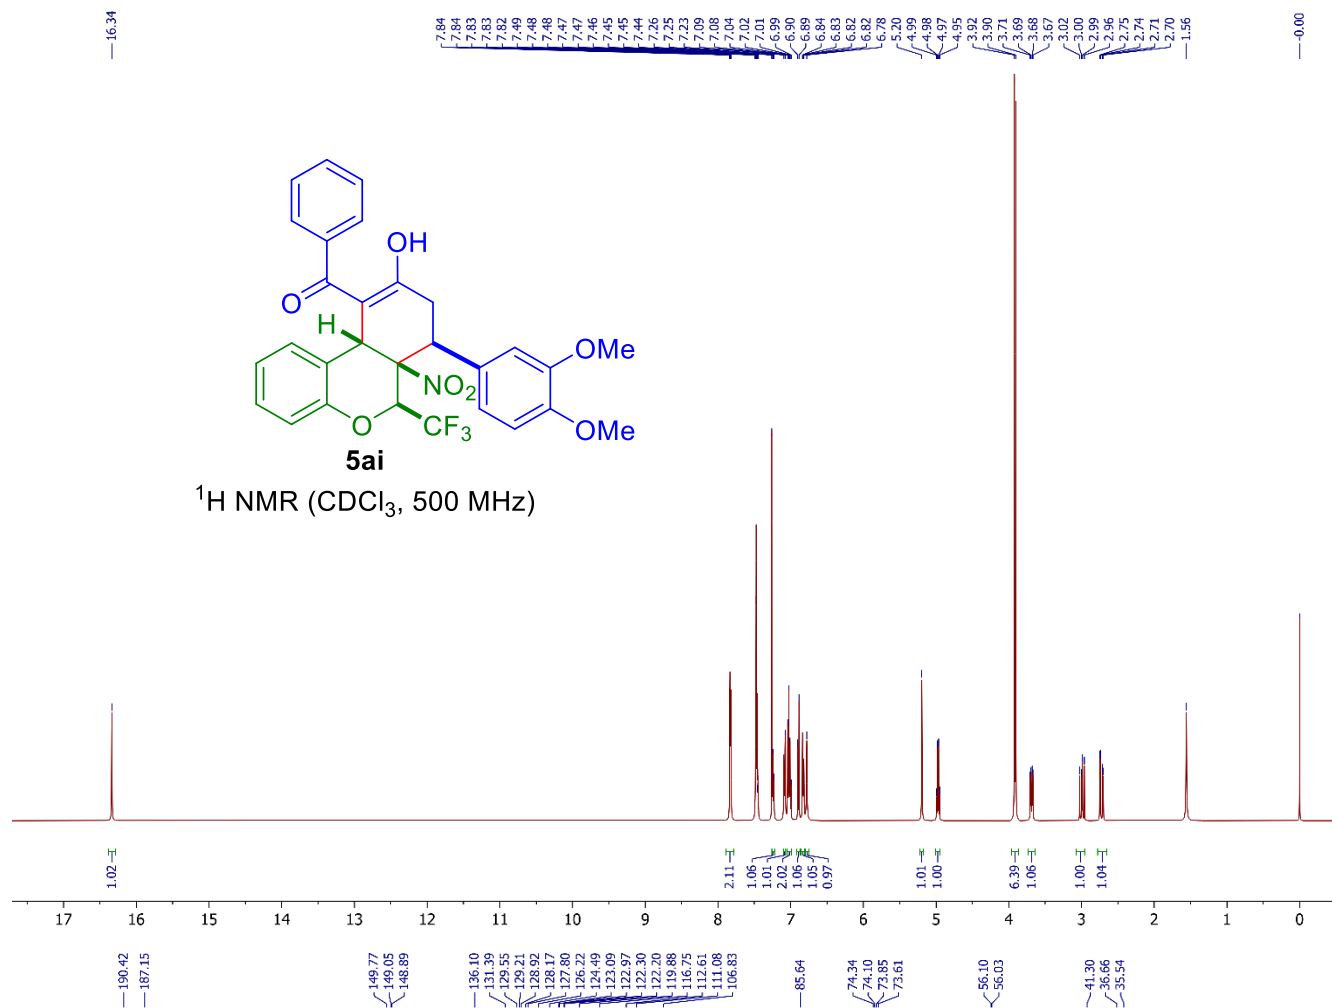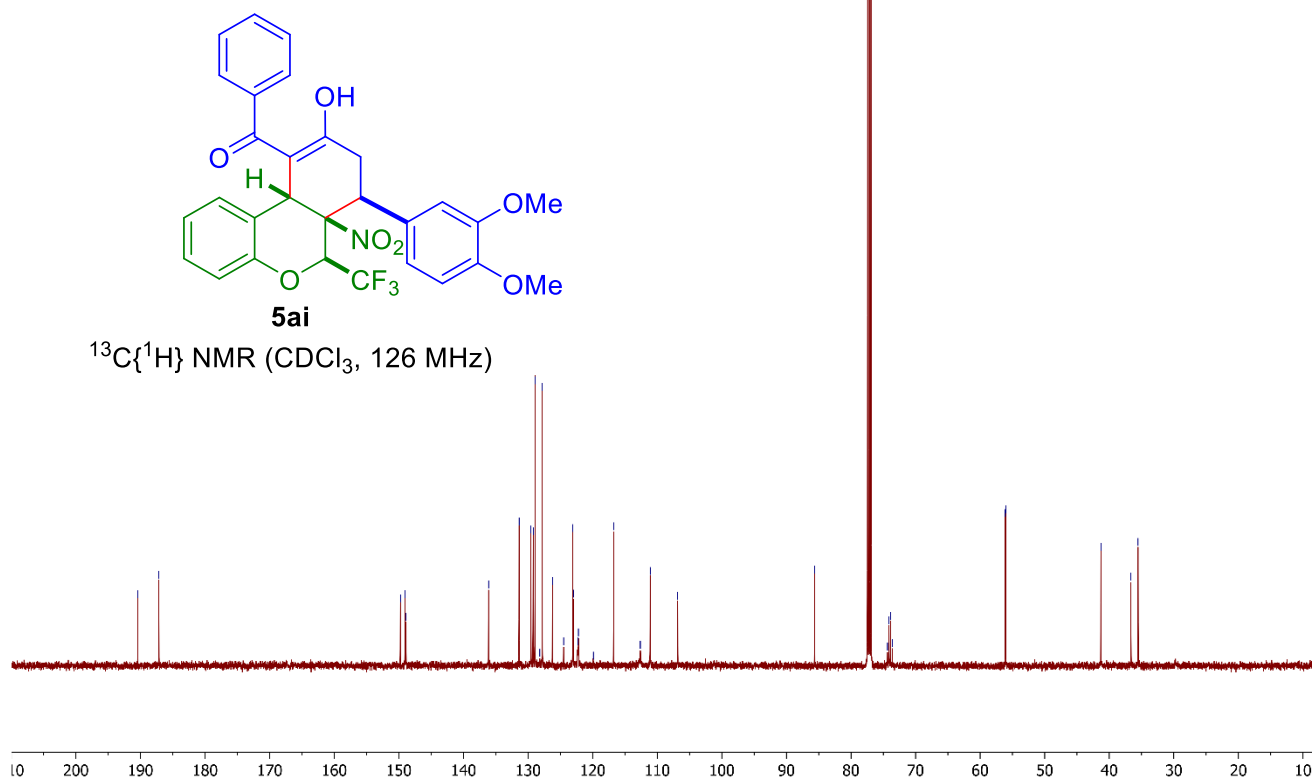

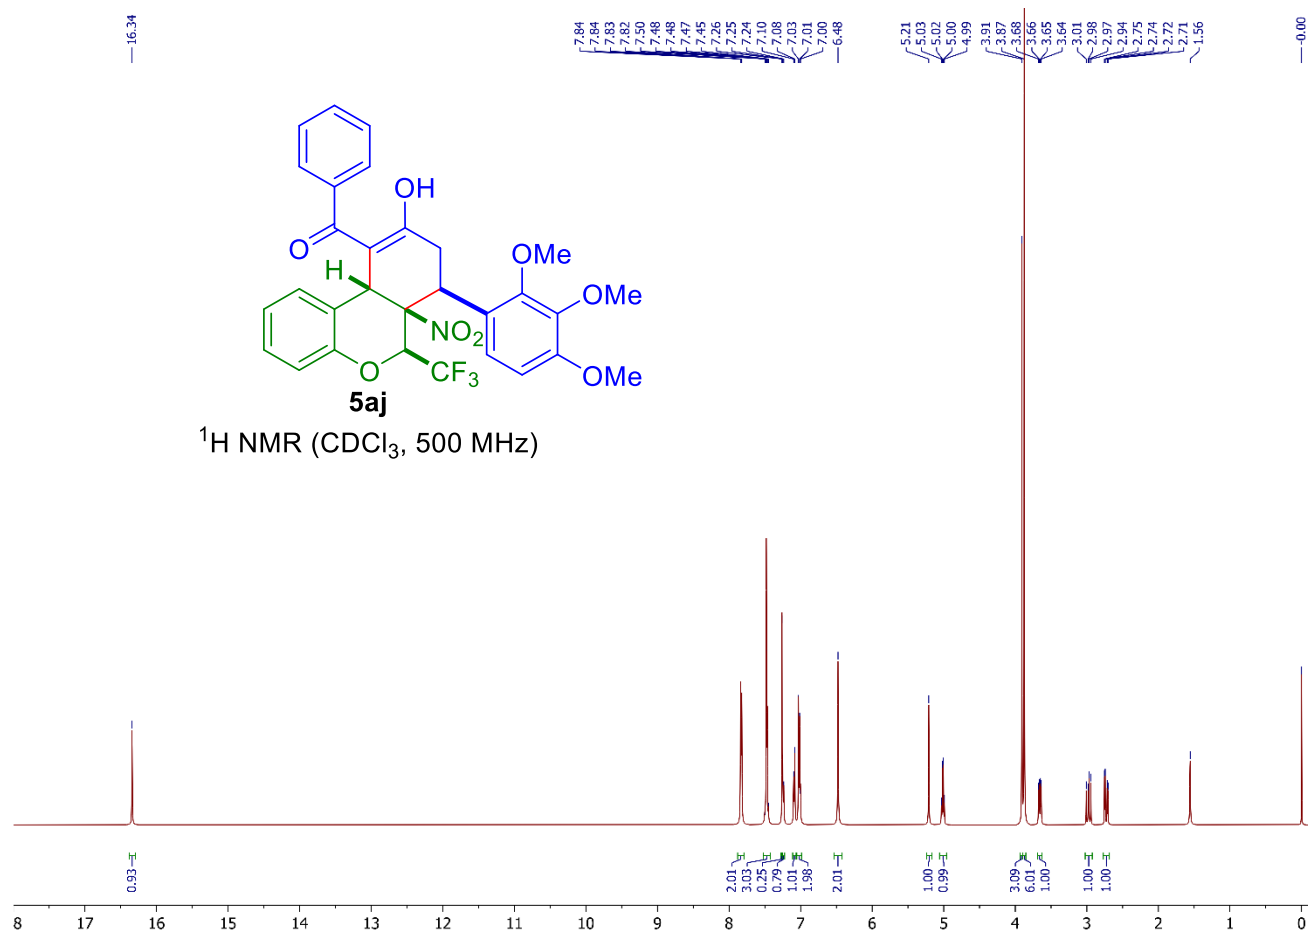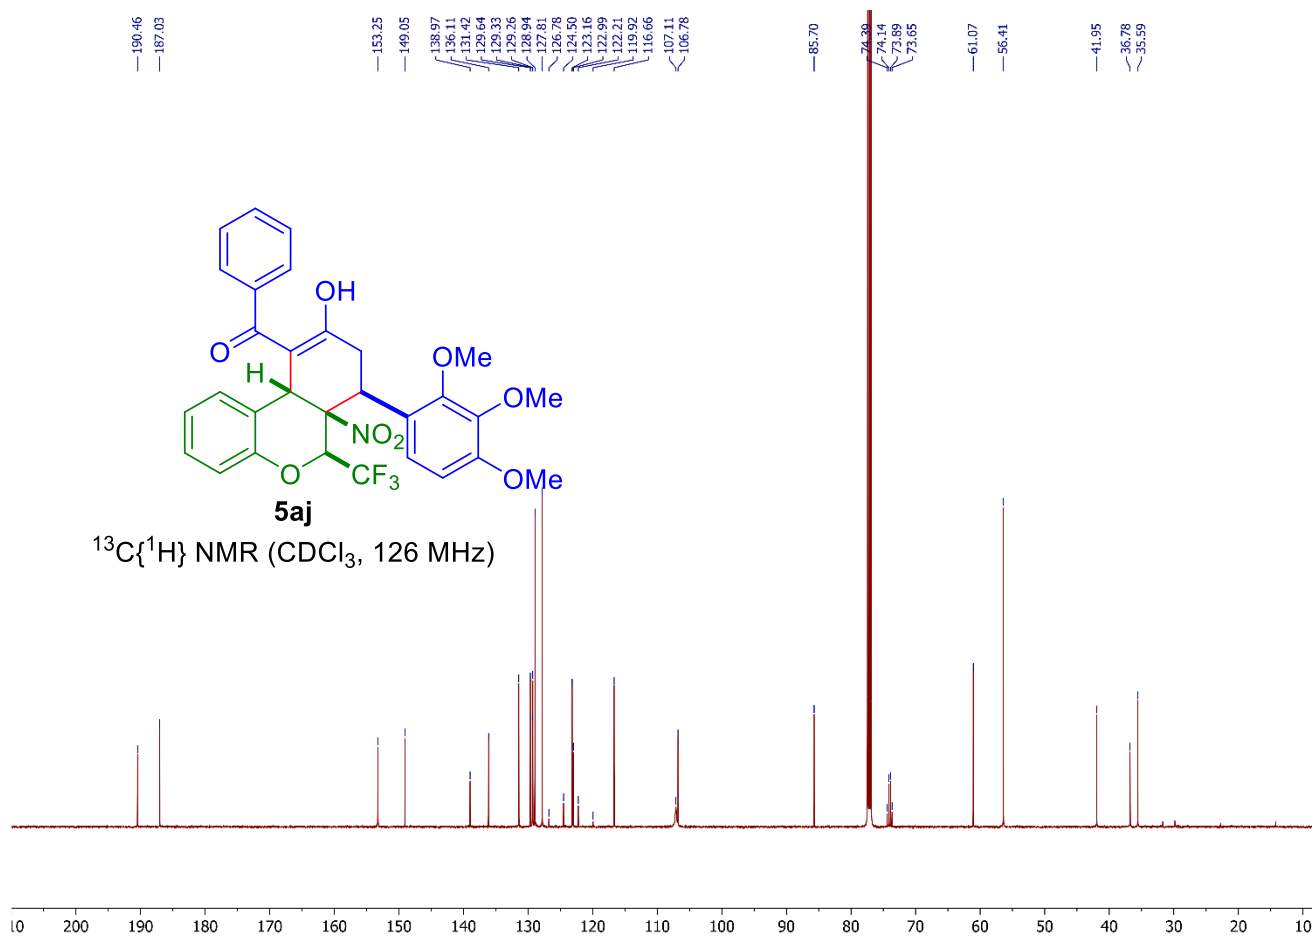

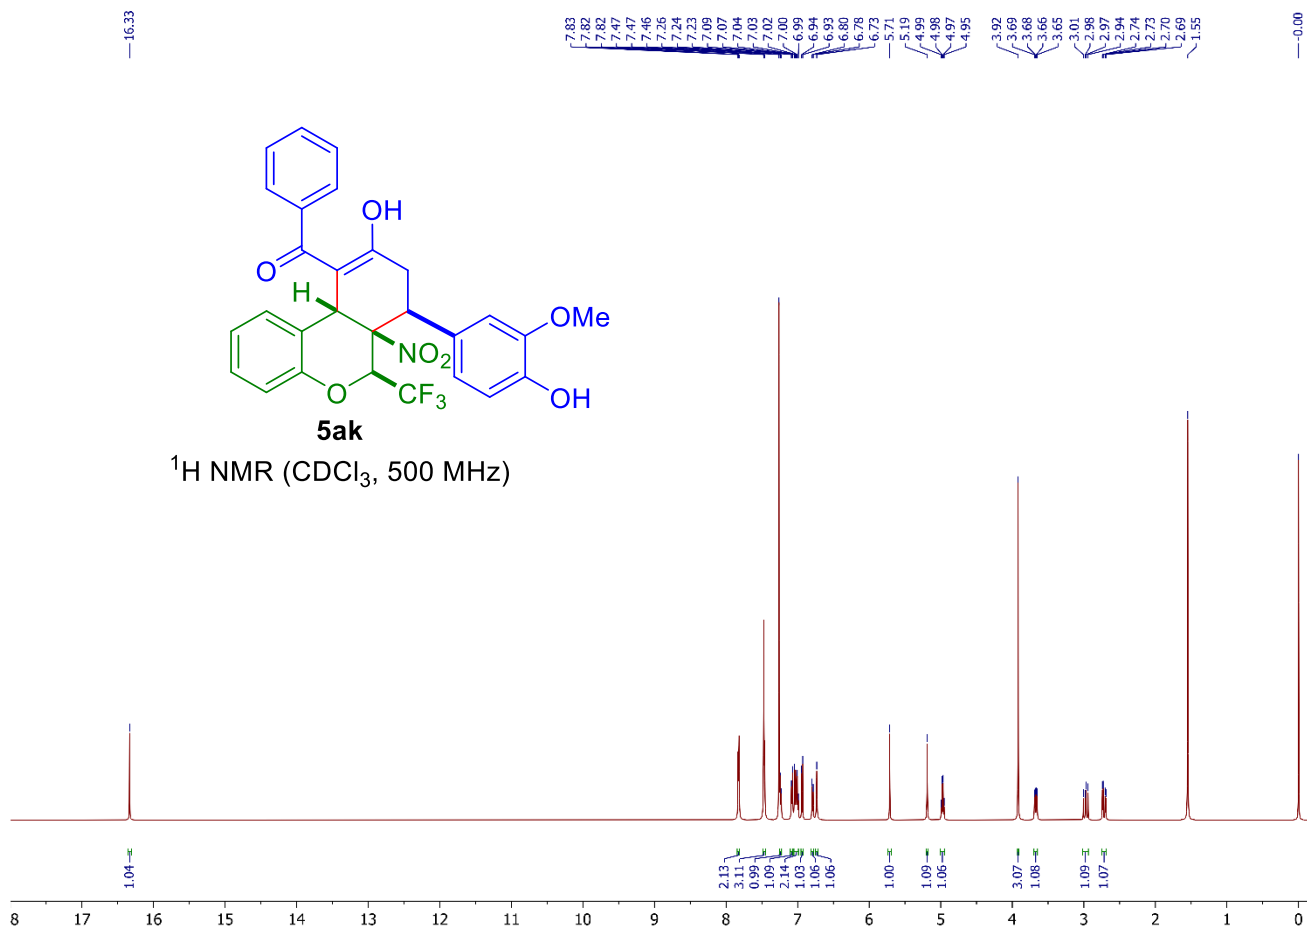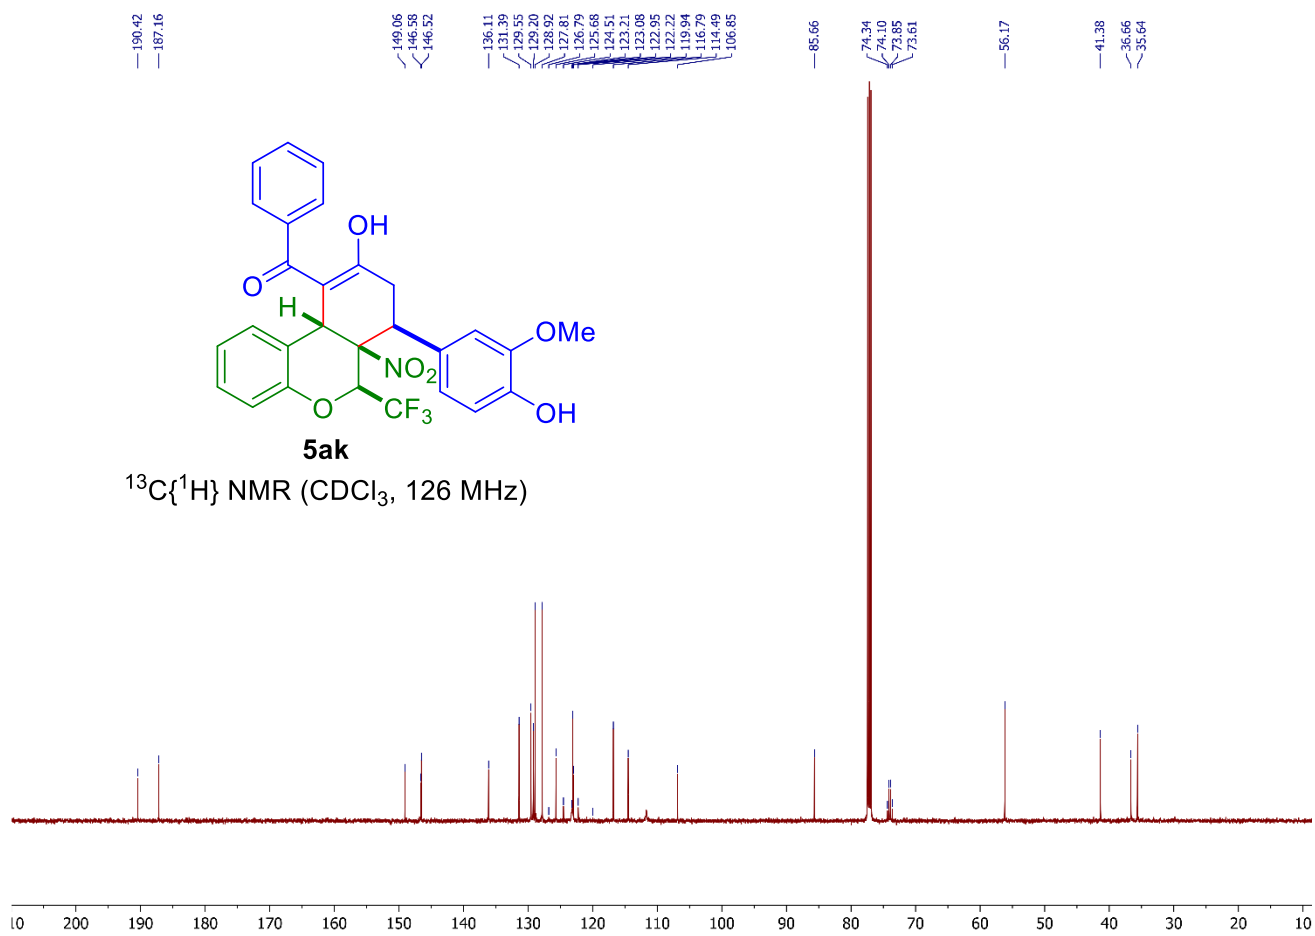

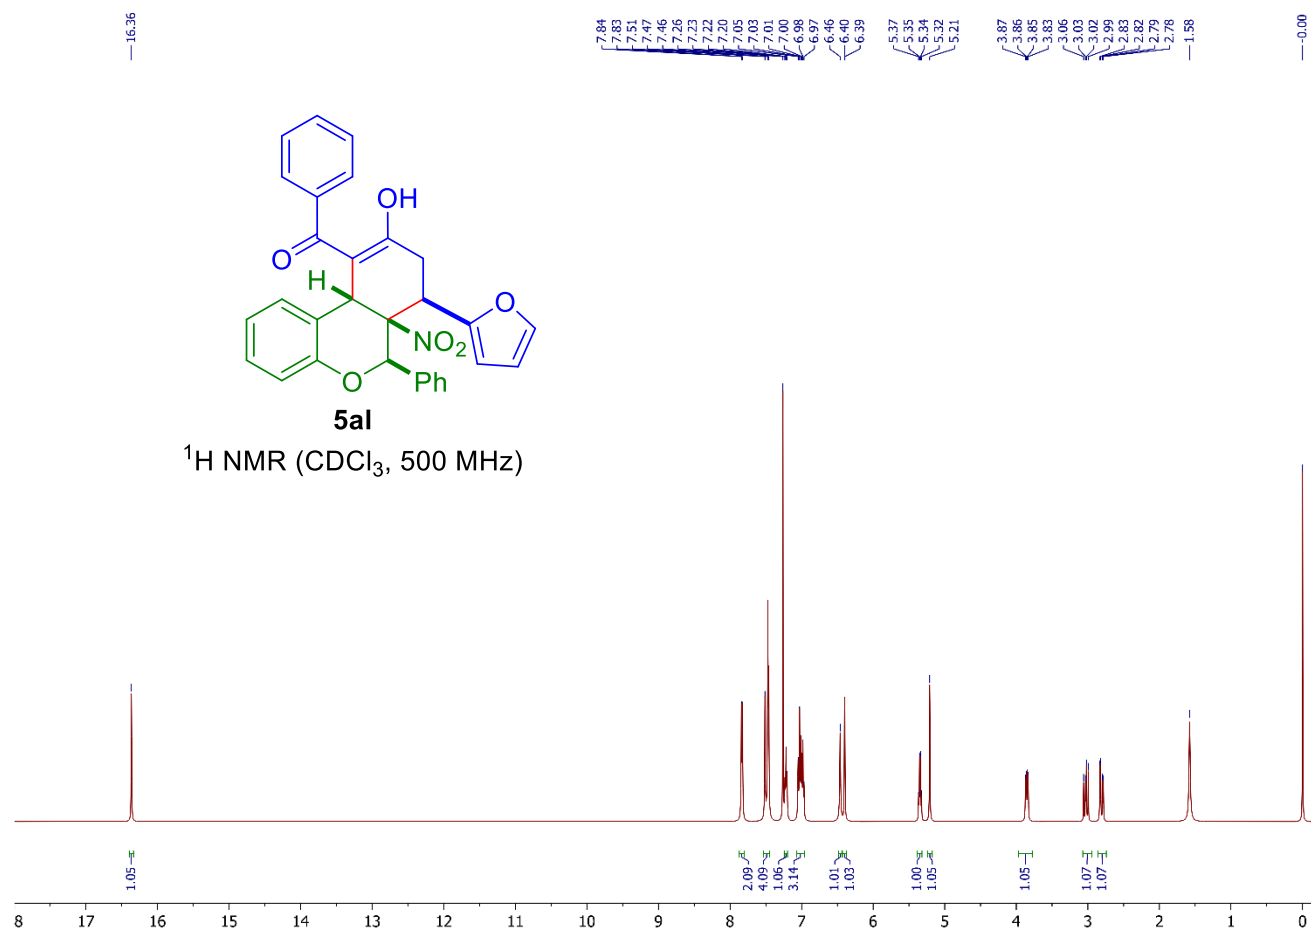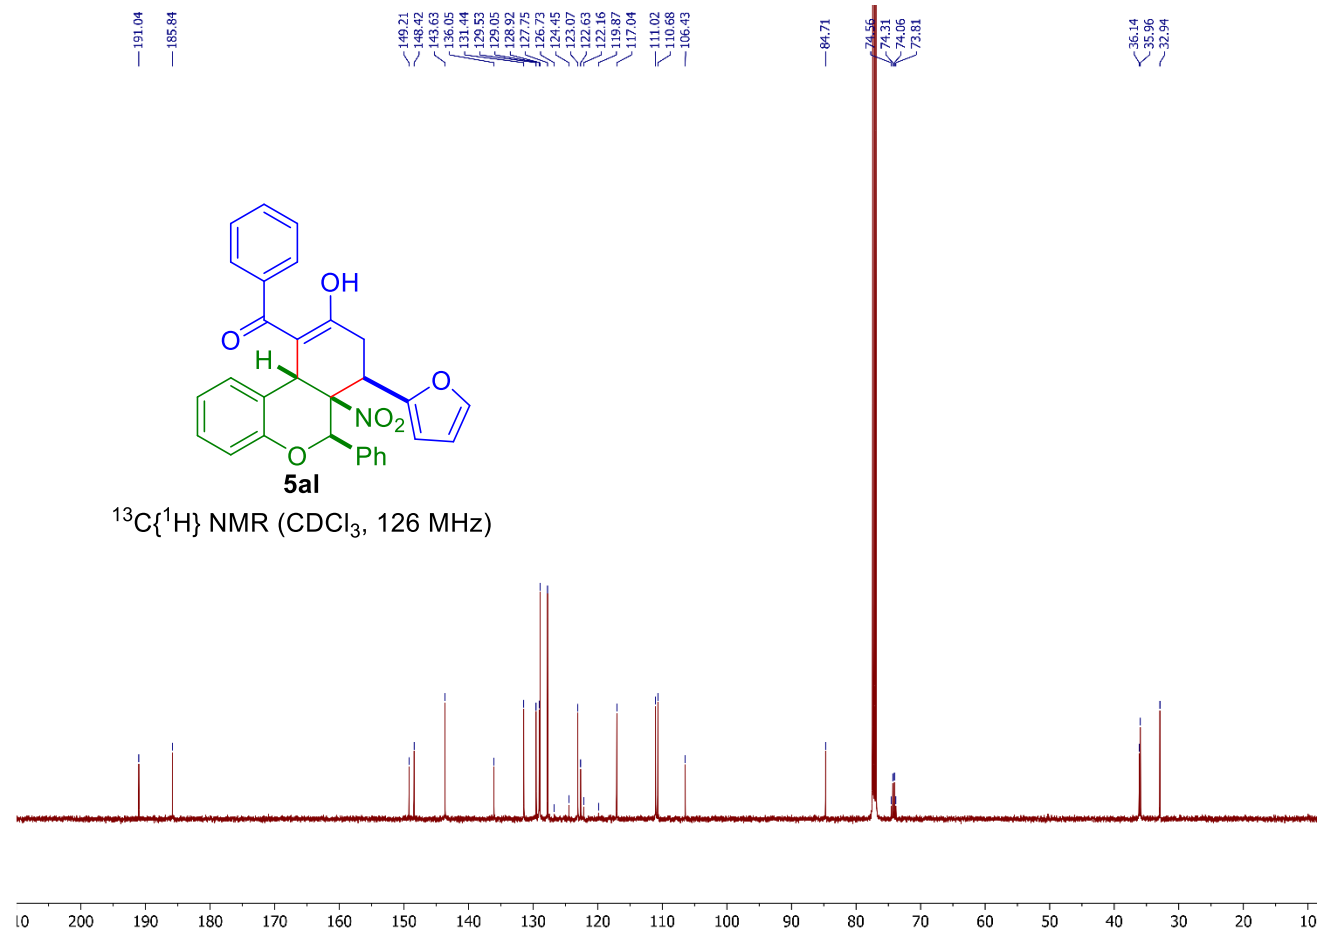

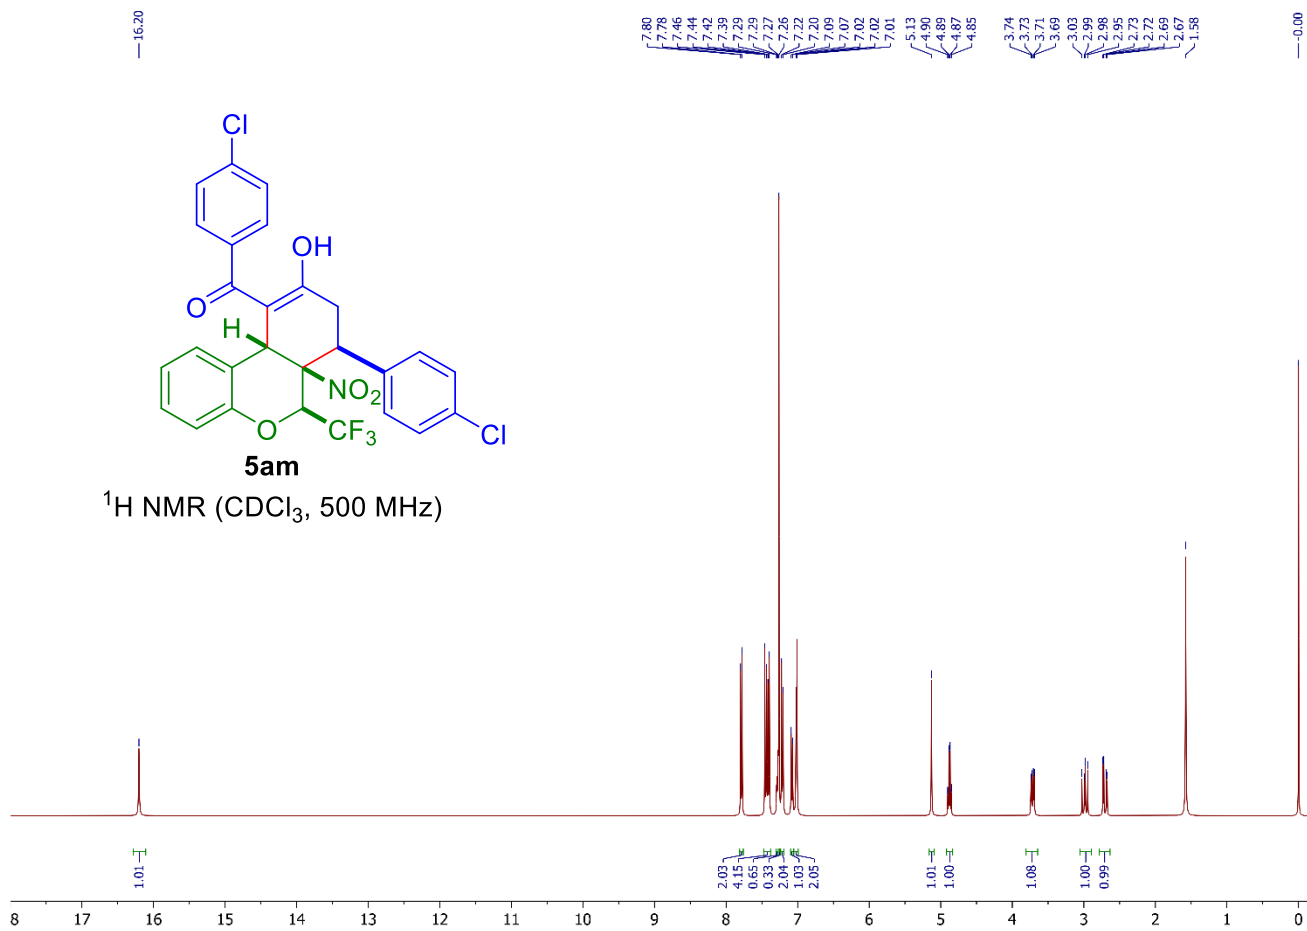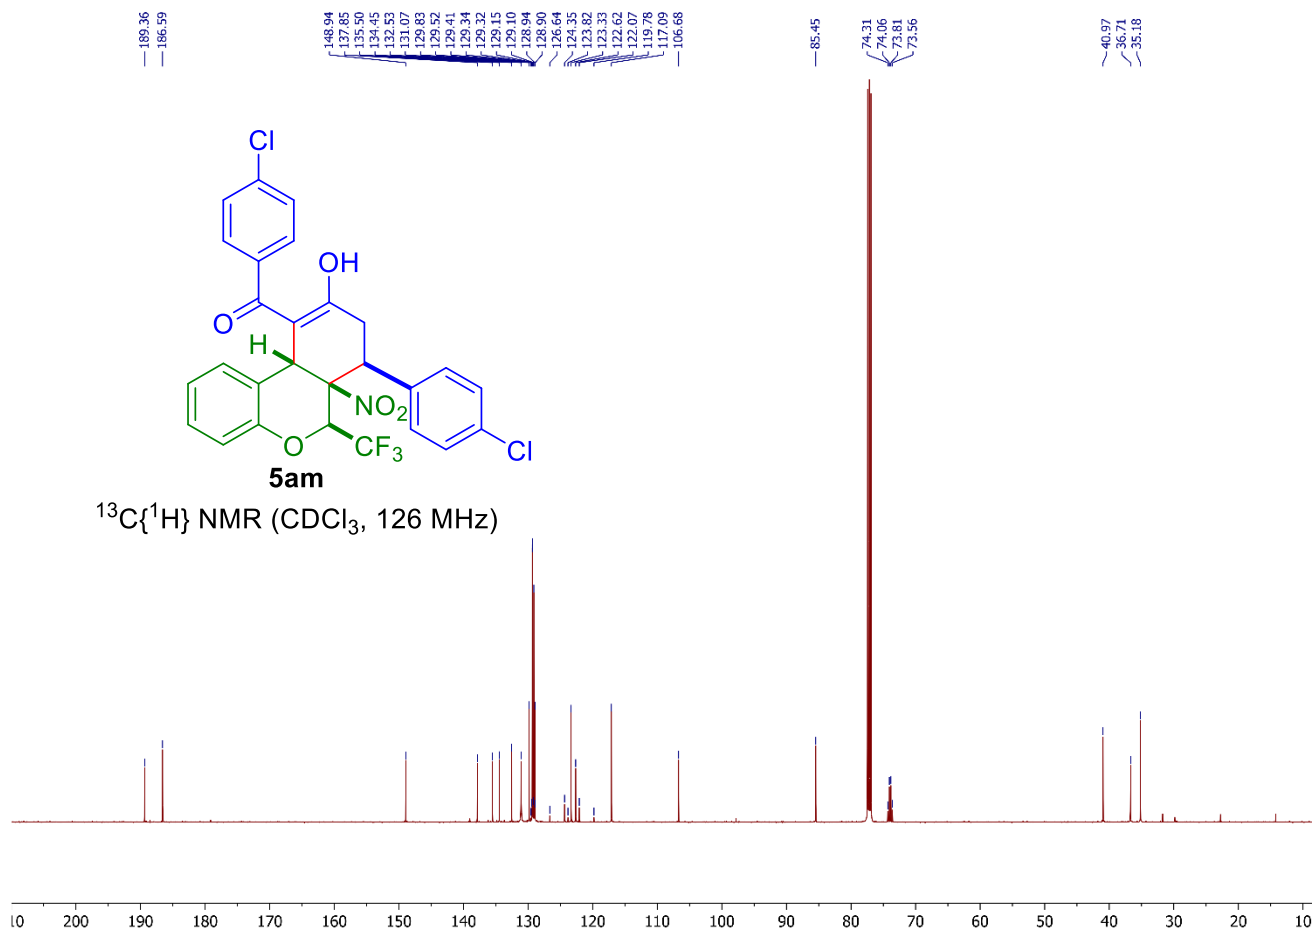

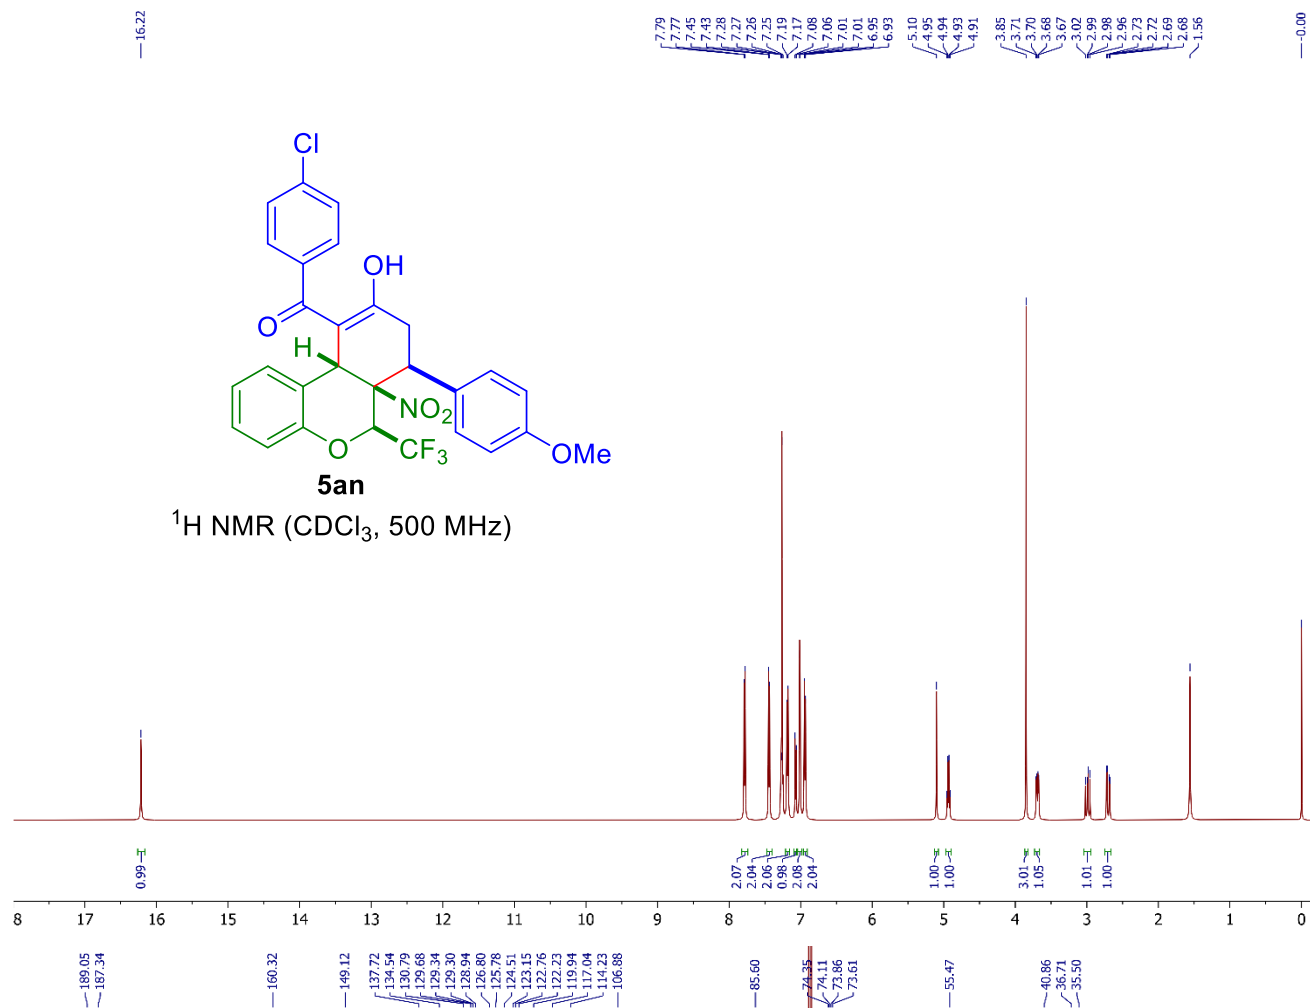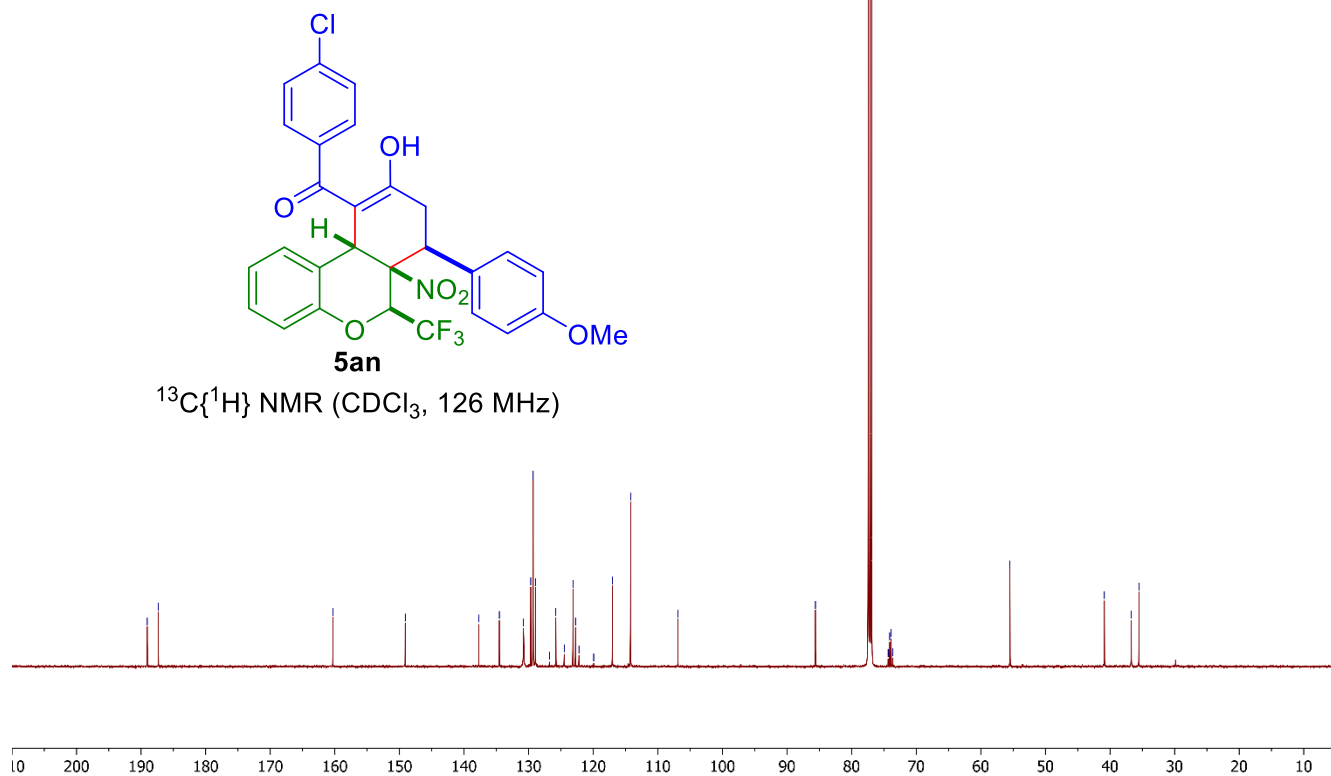



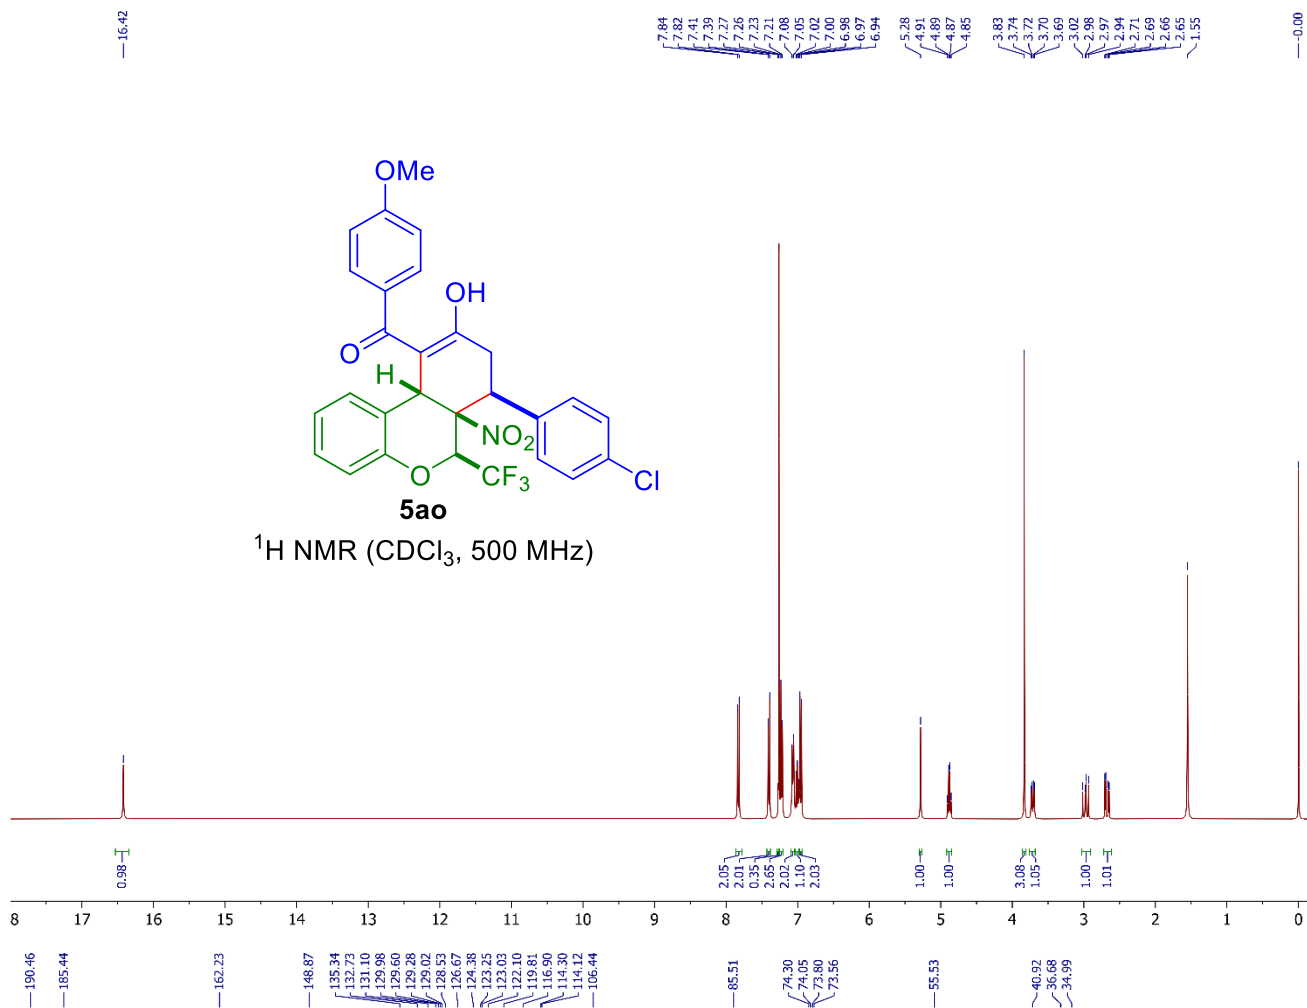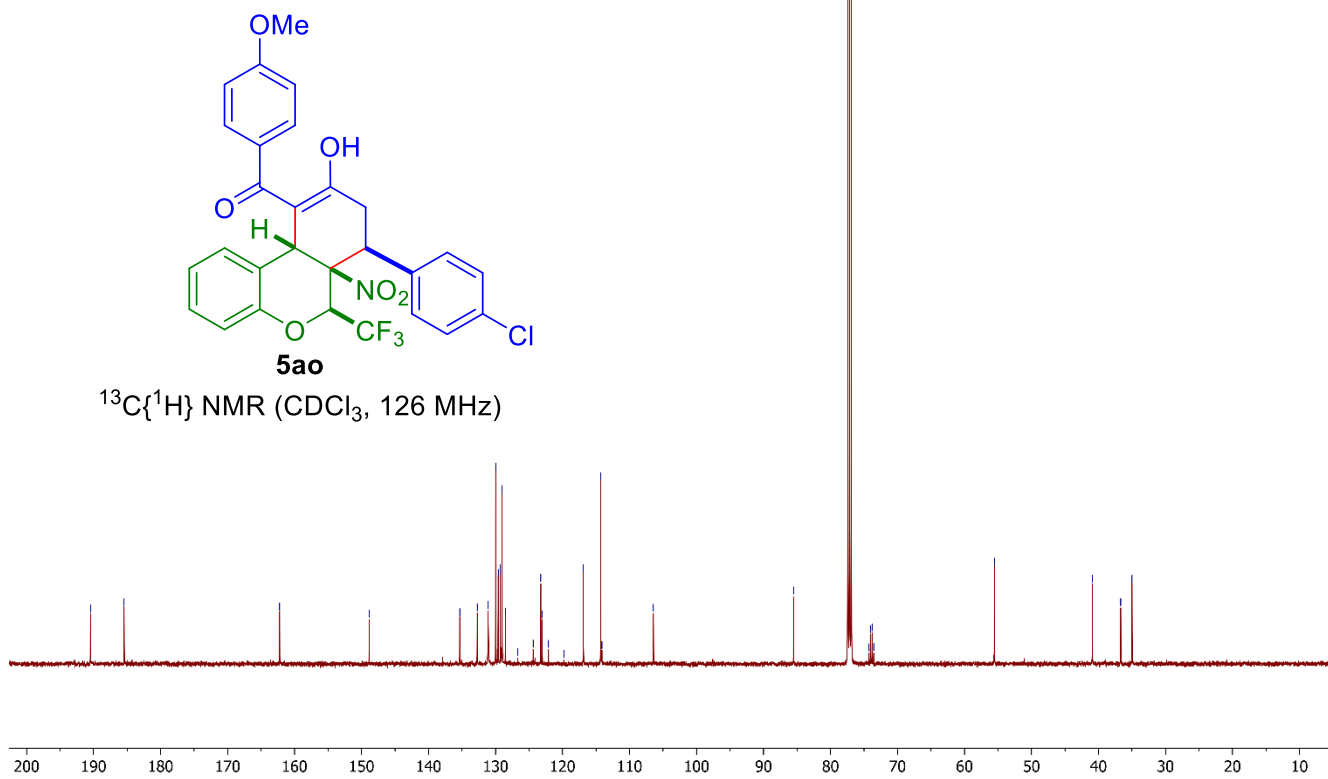

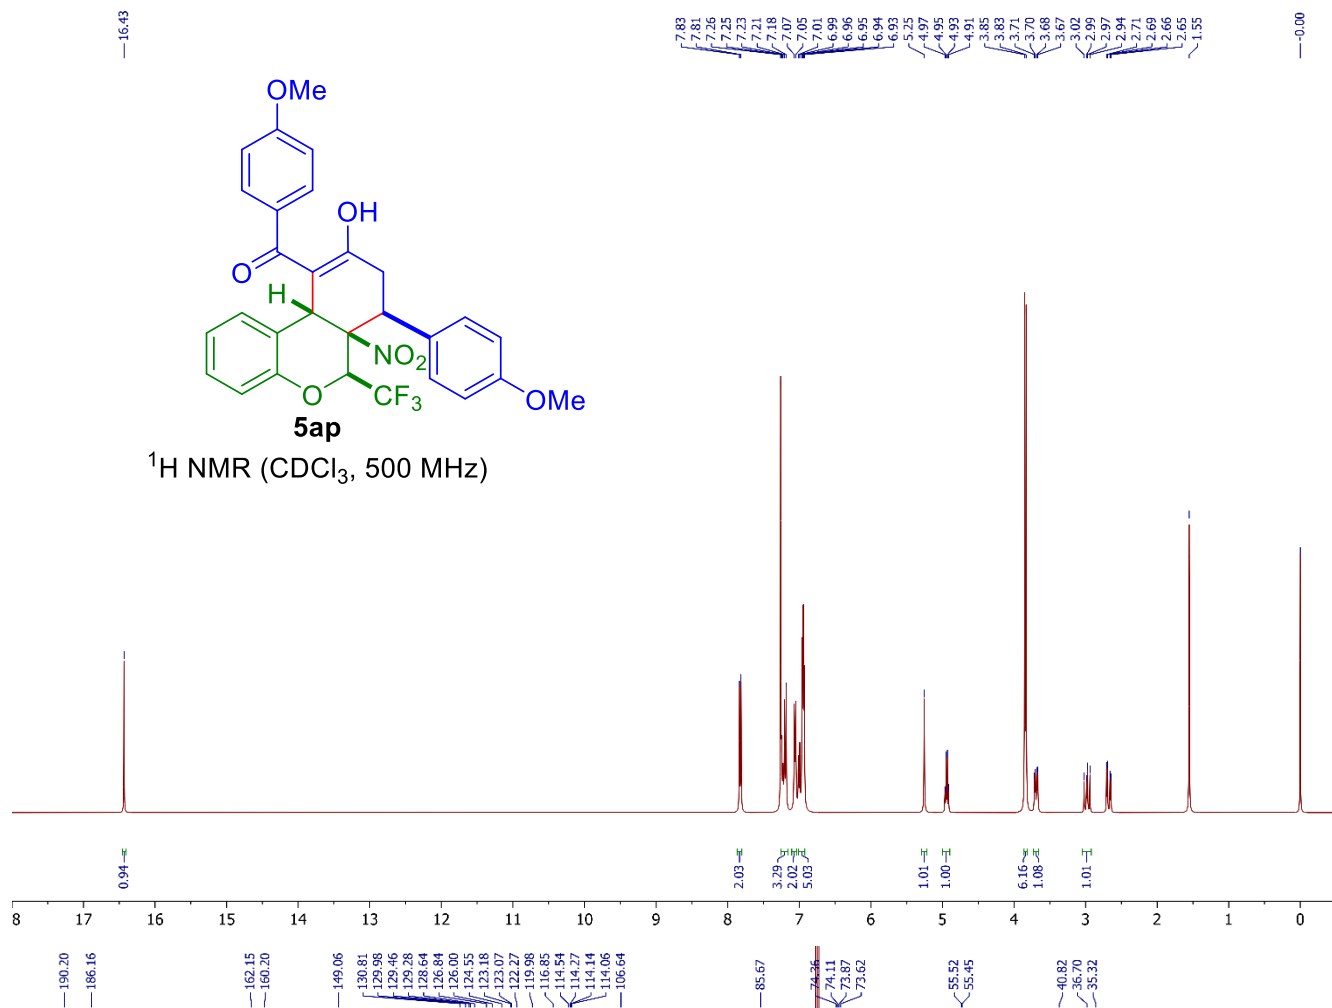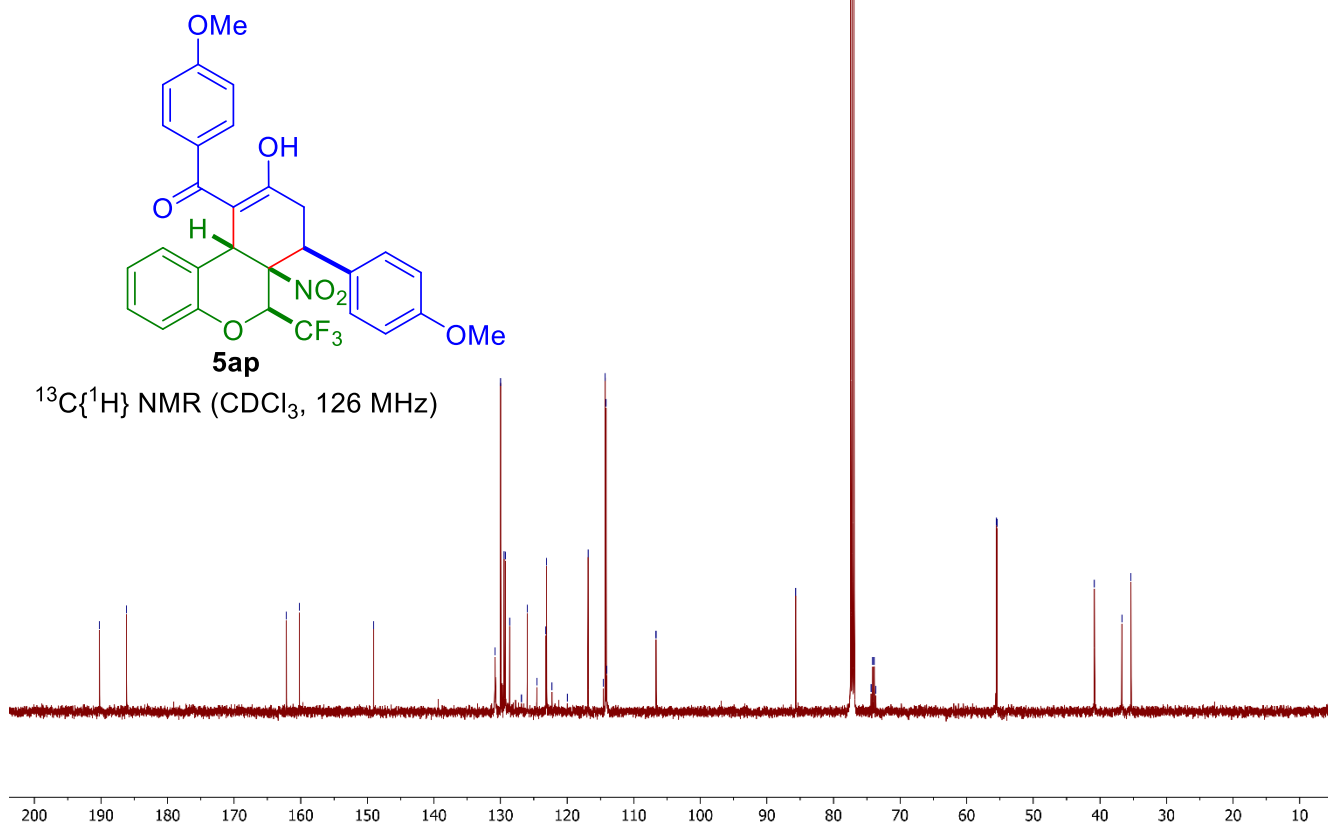

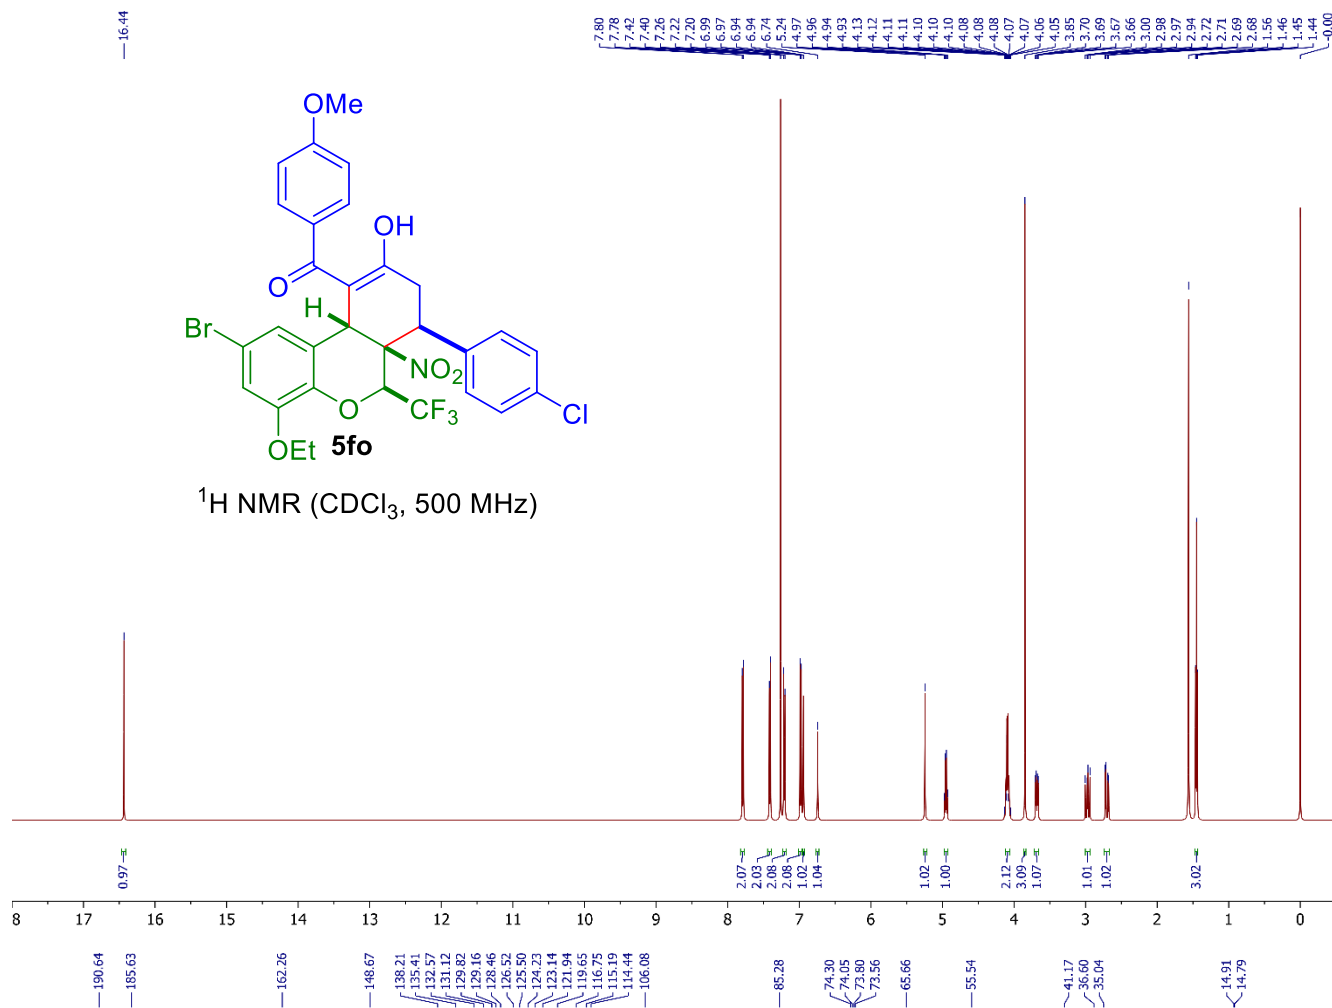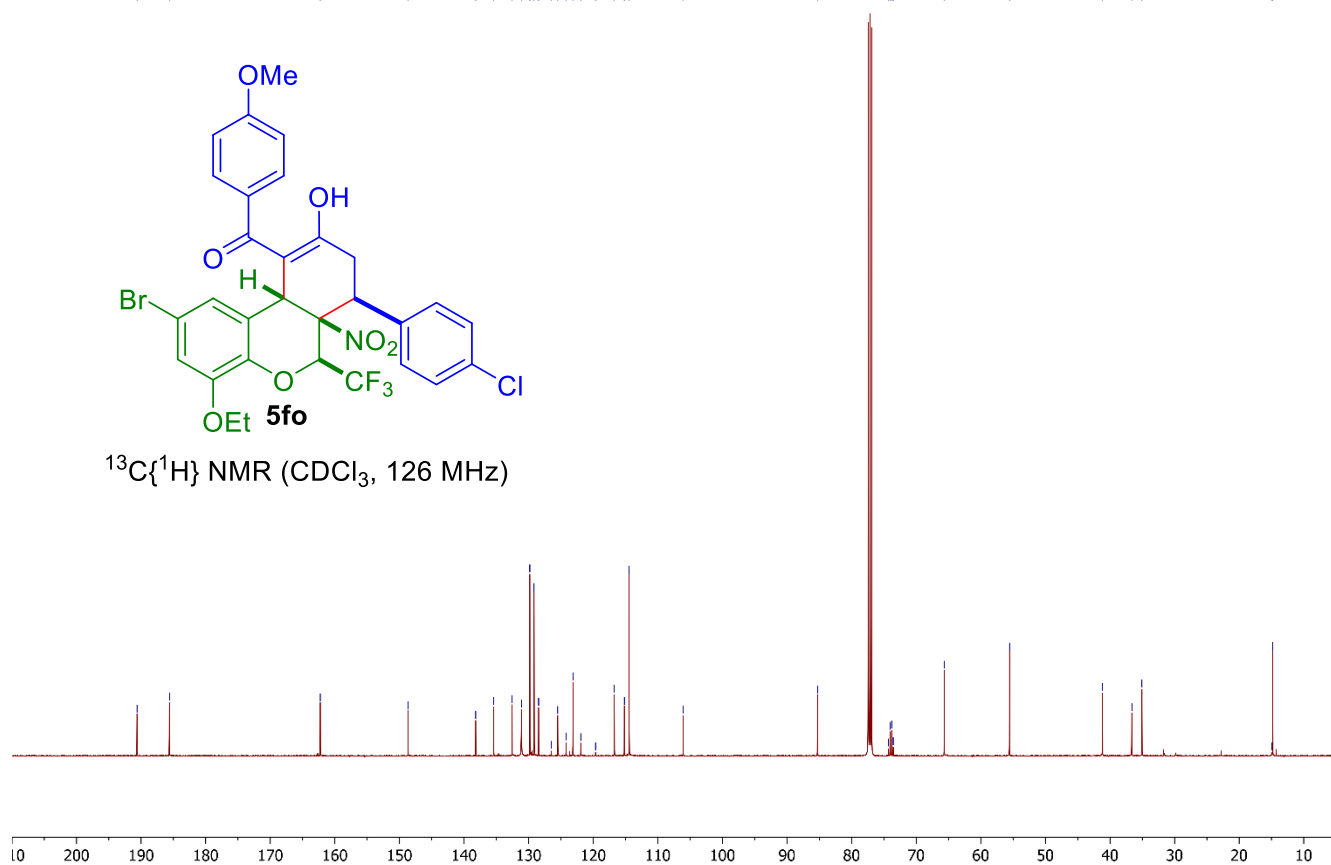

—16.52

8.13  
8.12  
8.11  
8.05  
7.87  
7.86  
7.19  
7.17  
7.15  
7.00  
6.99  
6.97  
6.95  
5.33  
5.05  
5.04  
5.03  
5.01  
3.86  
3.83  
3.85  
3.54  
3.52  
3.51  
3.05  
3.02  
3.01  
2.98  
2.75  
2.74  
2.71  
2.70

—0.00

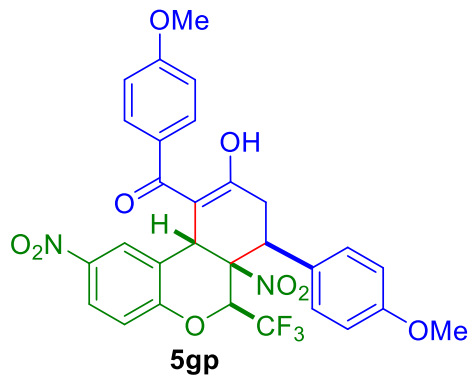

$^1\text{H}$  NMR ( $\text{CDCl}_3$ , 500 MHz)

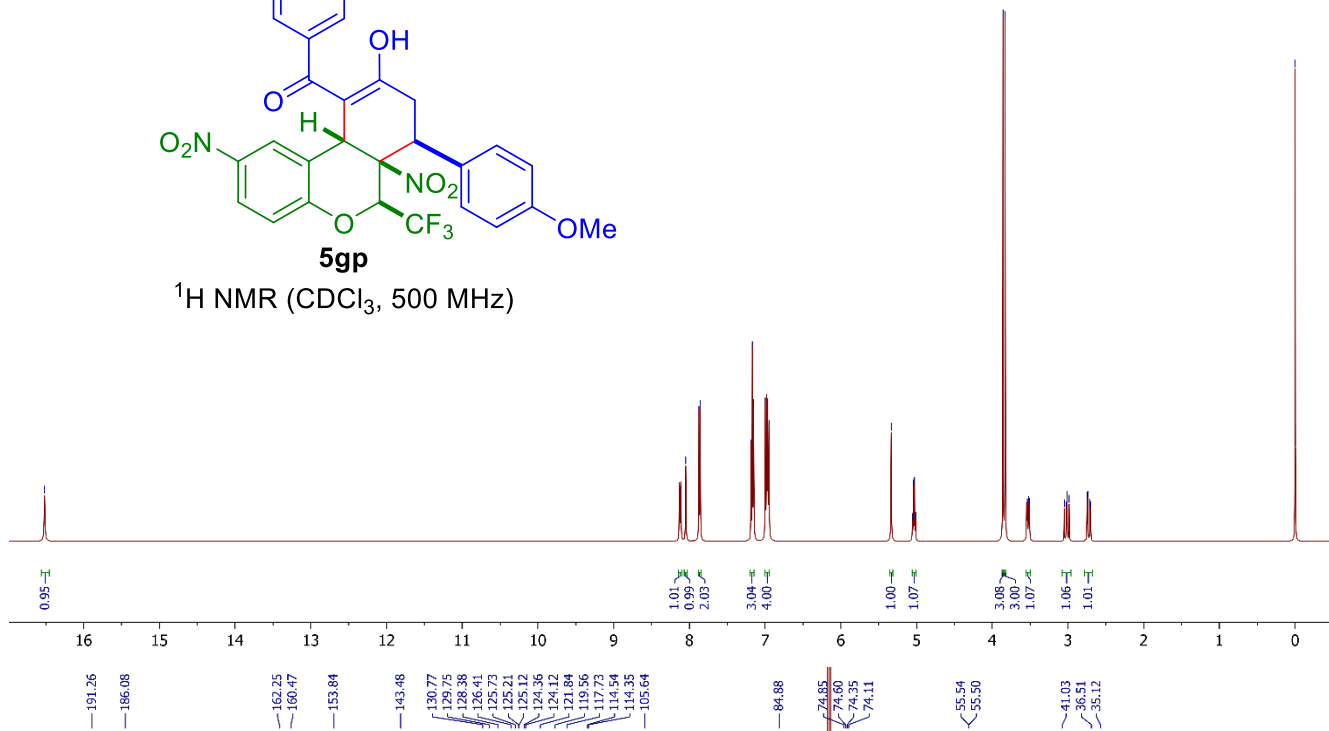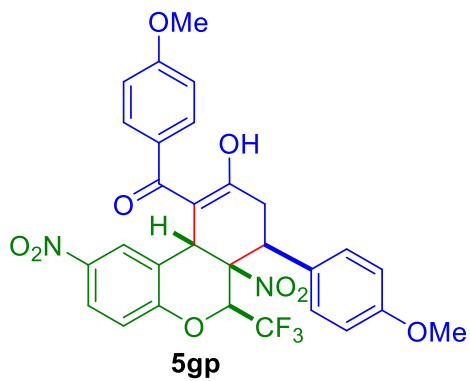

$^{13}\text{C}\{^1\text{H}\}$  NMR ( $\text{CDCl}_3$ , 126 MHz)

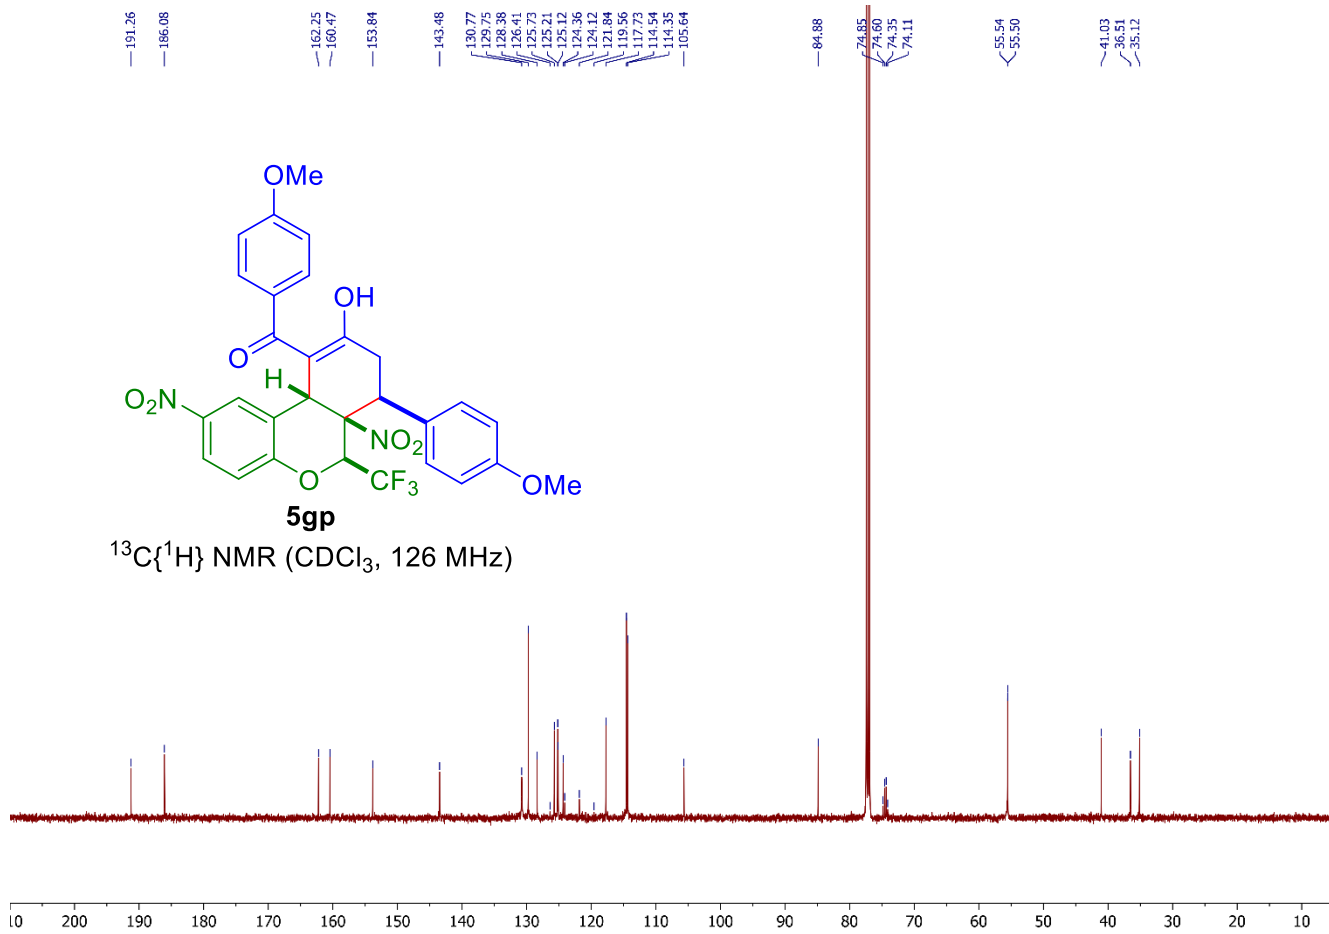

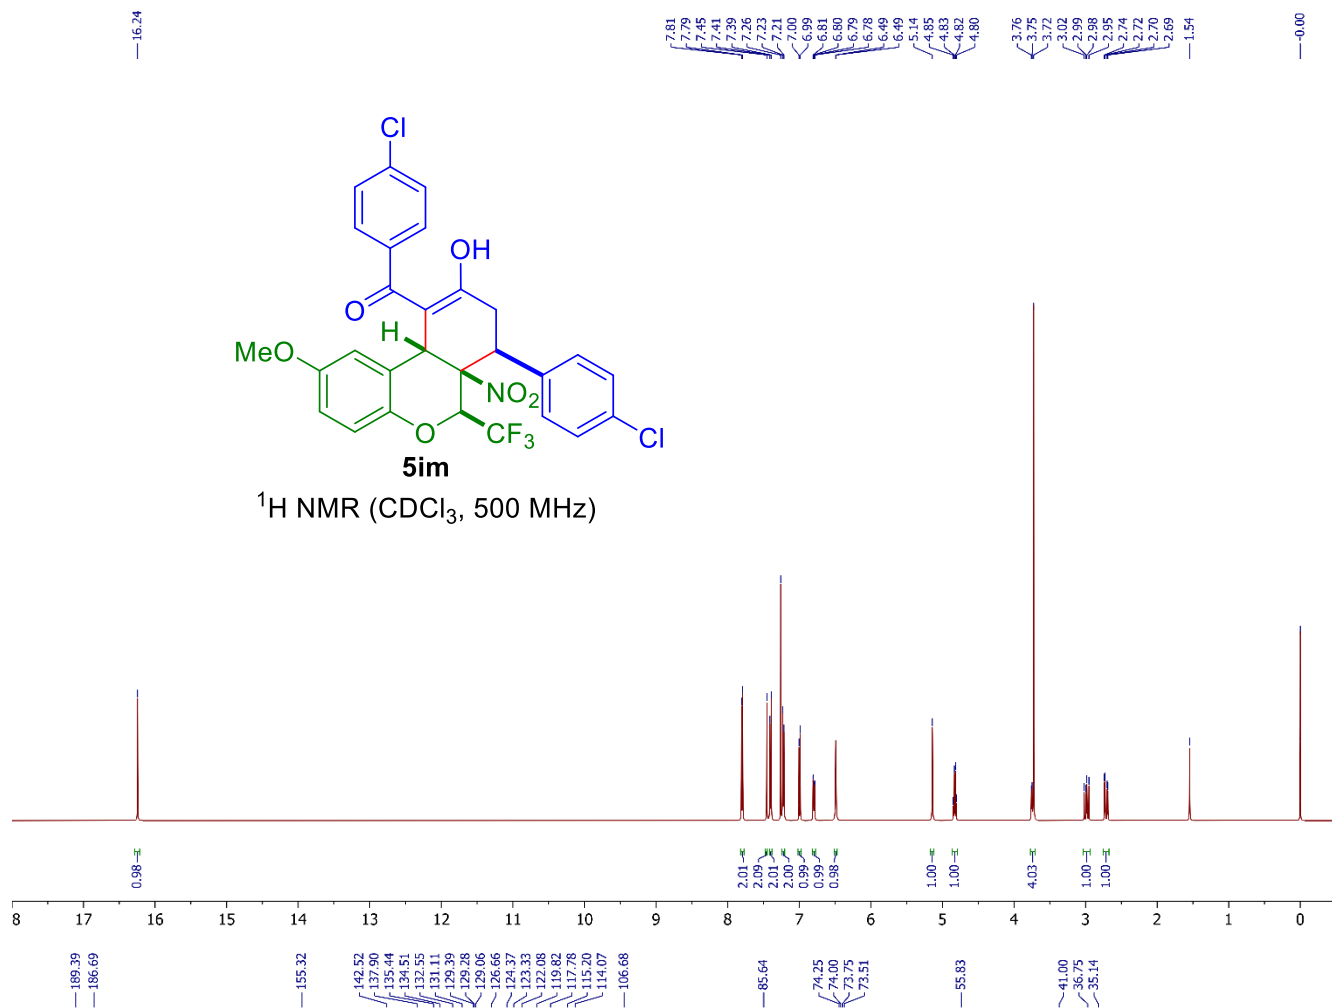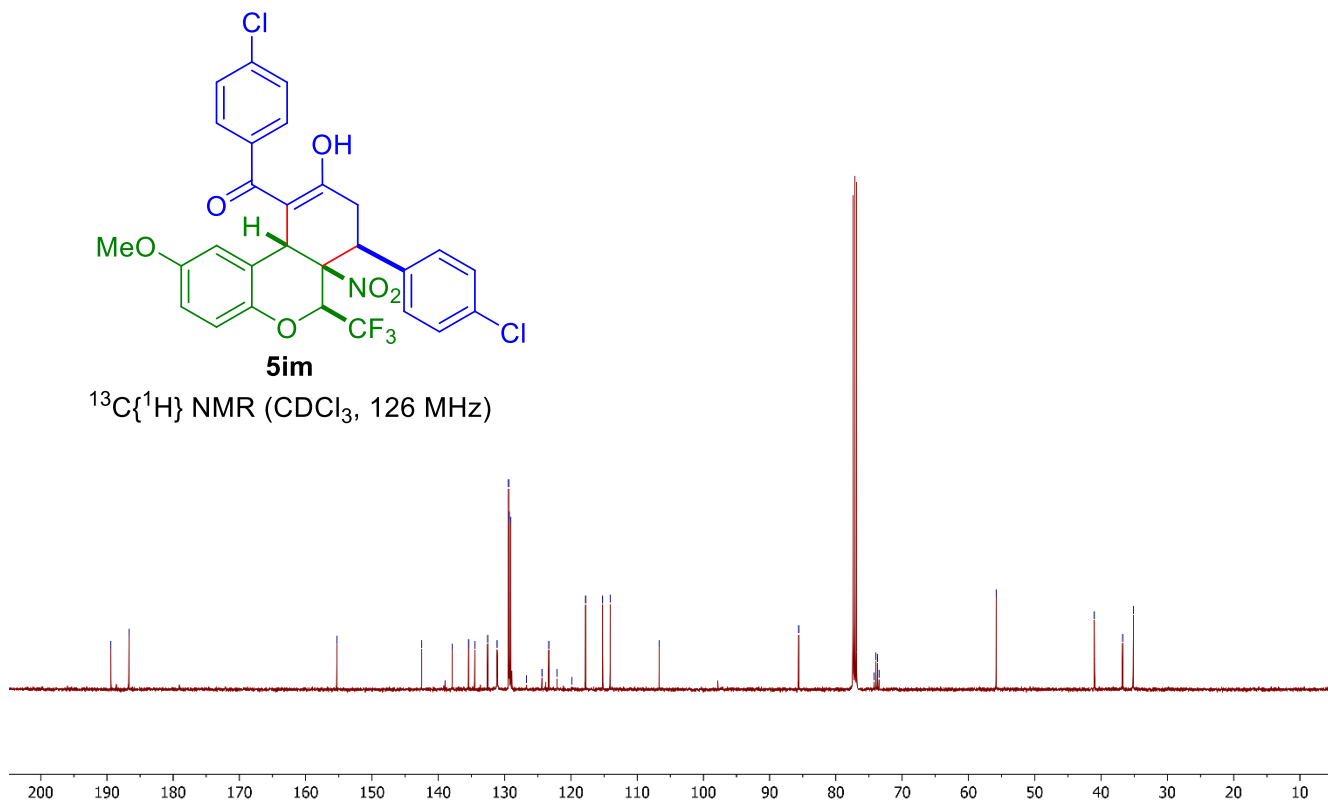

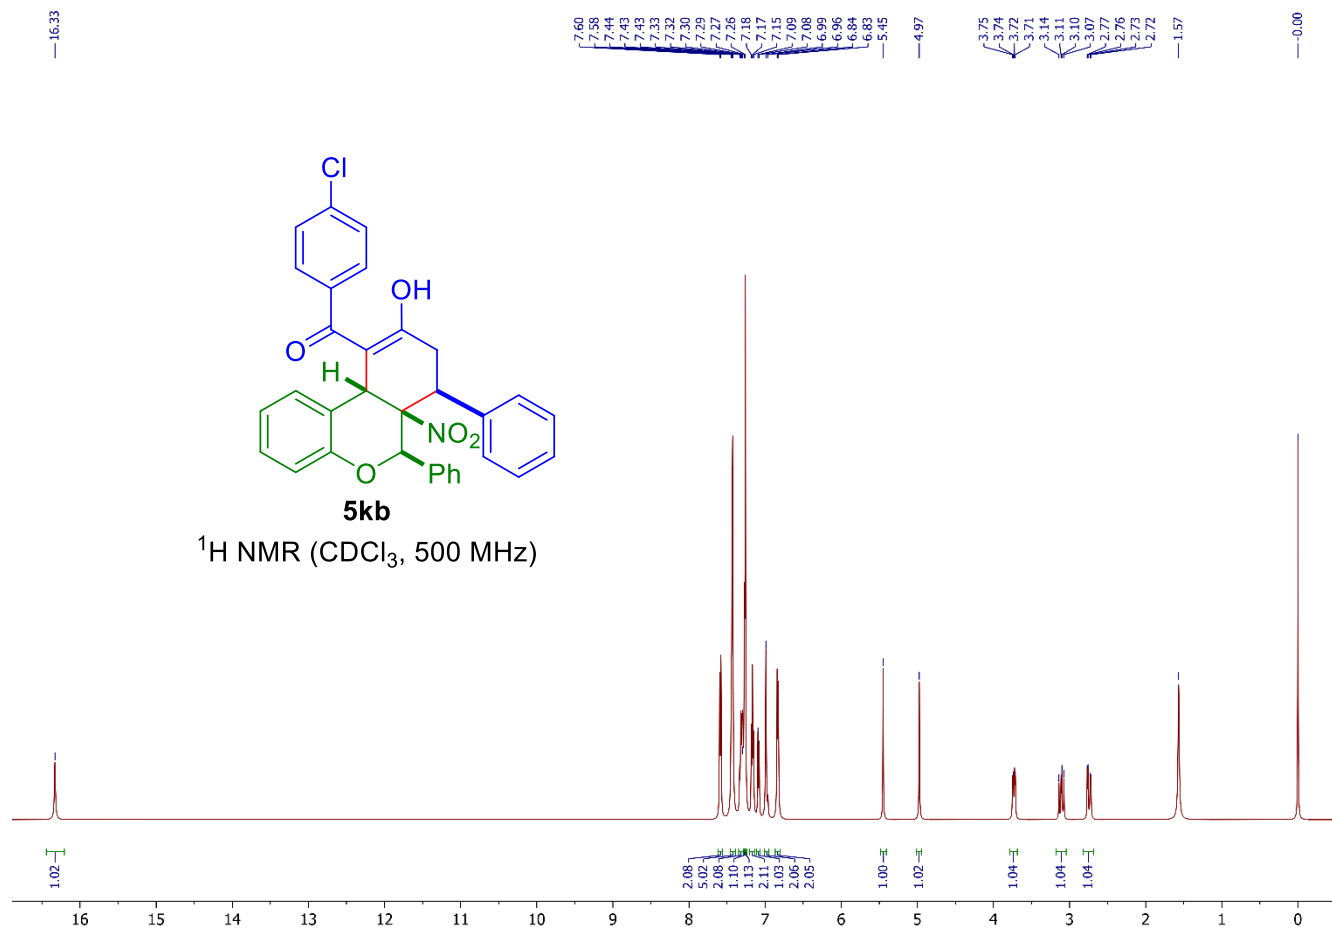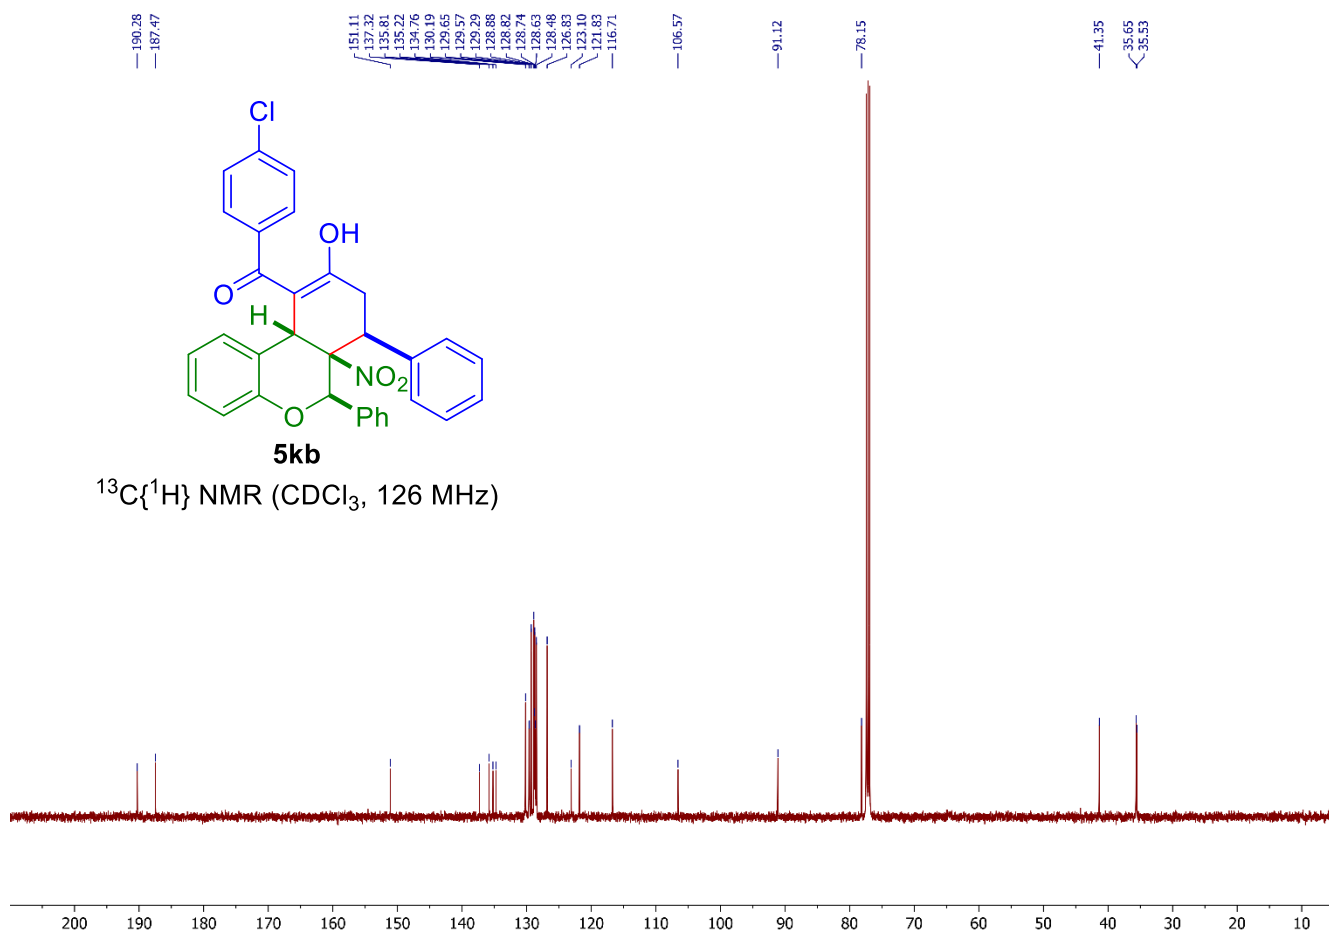

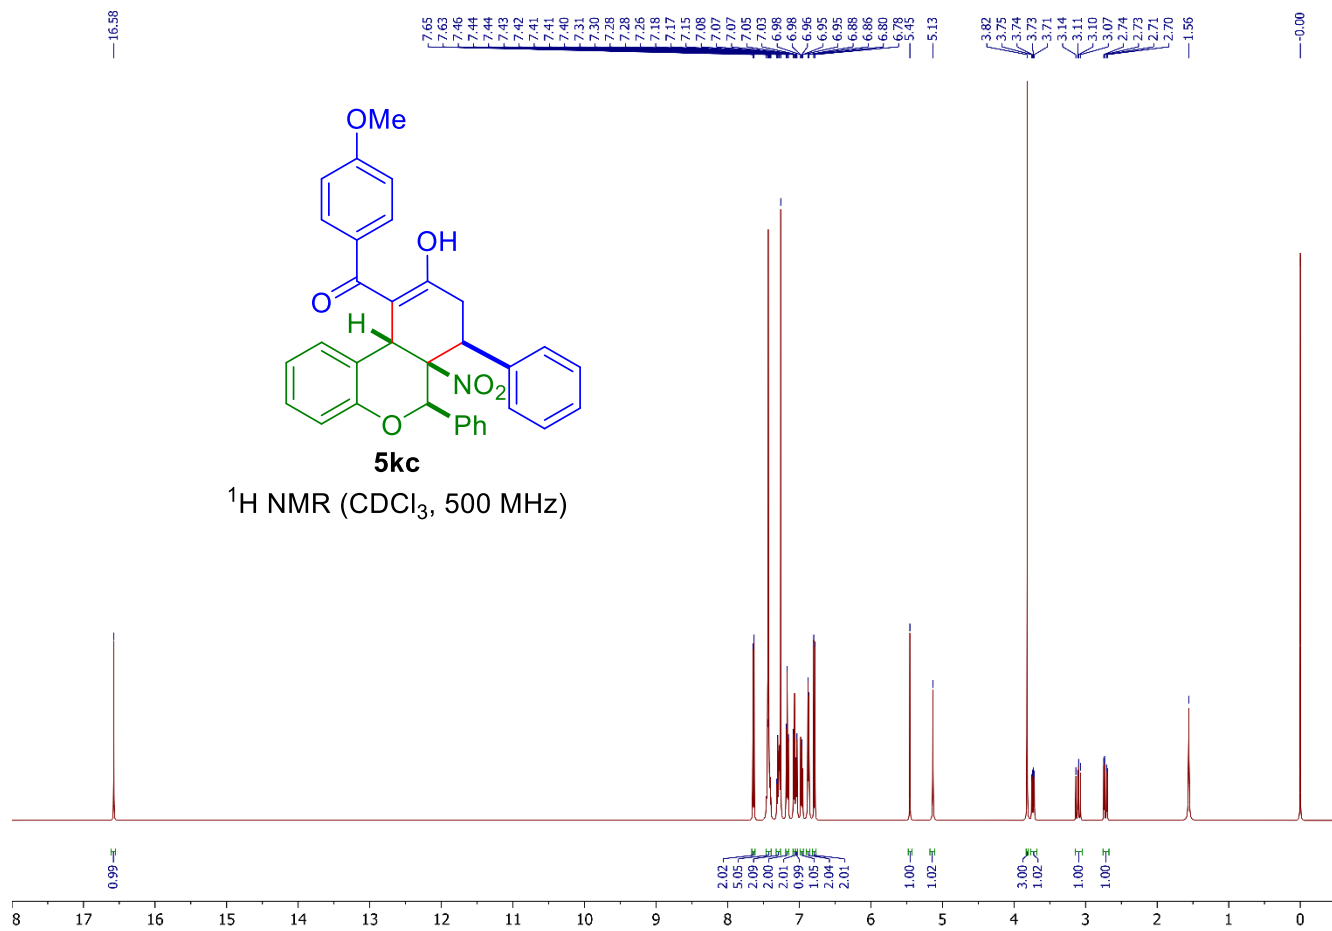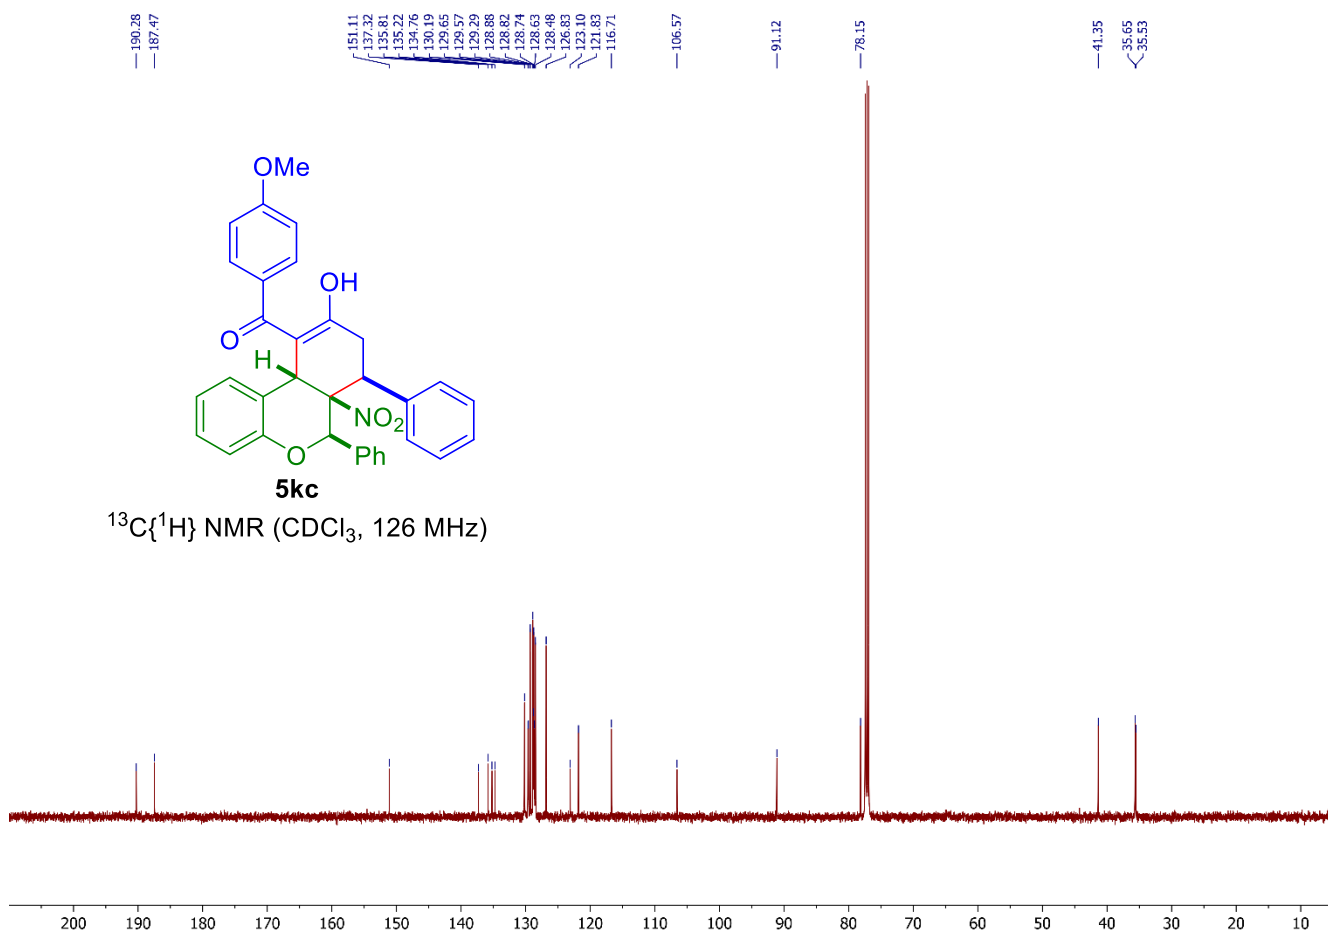

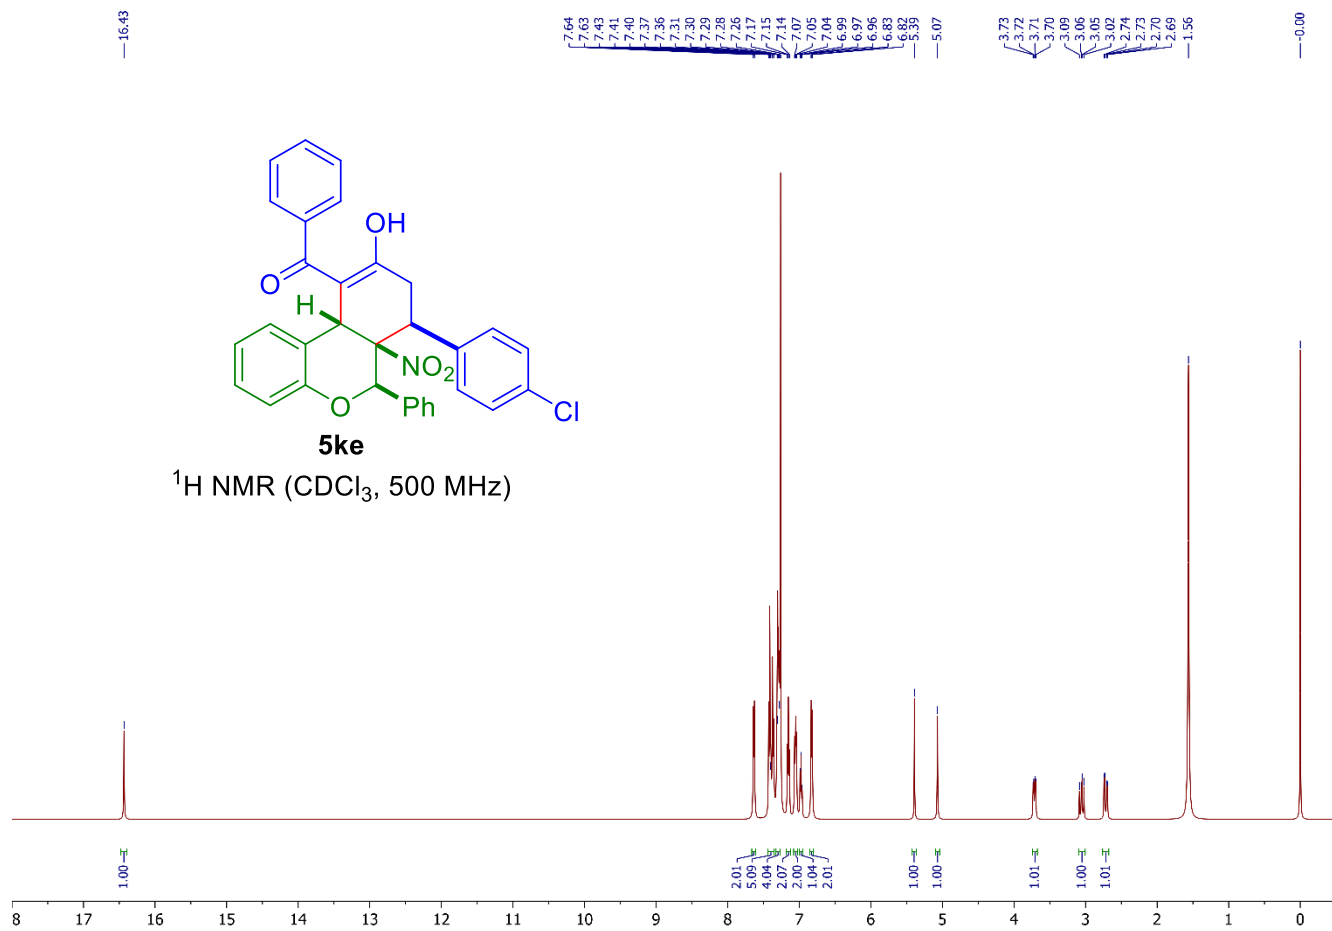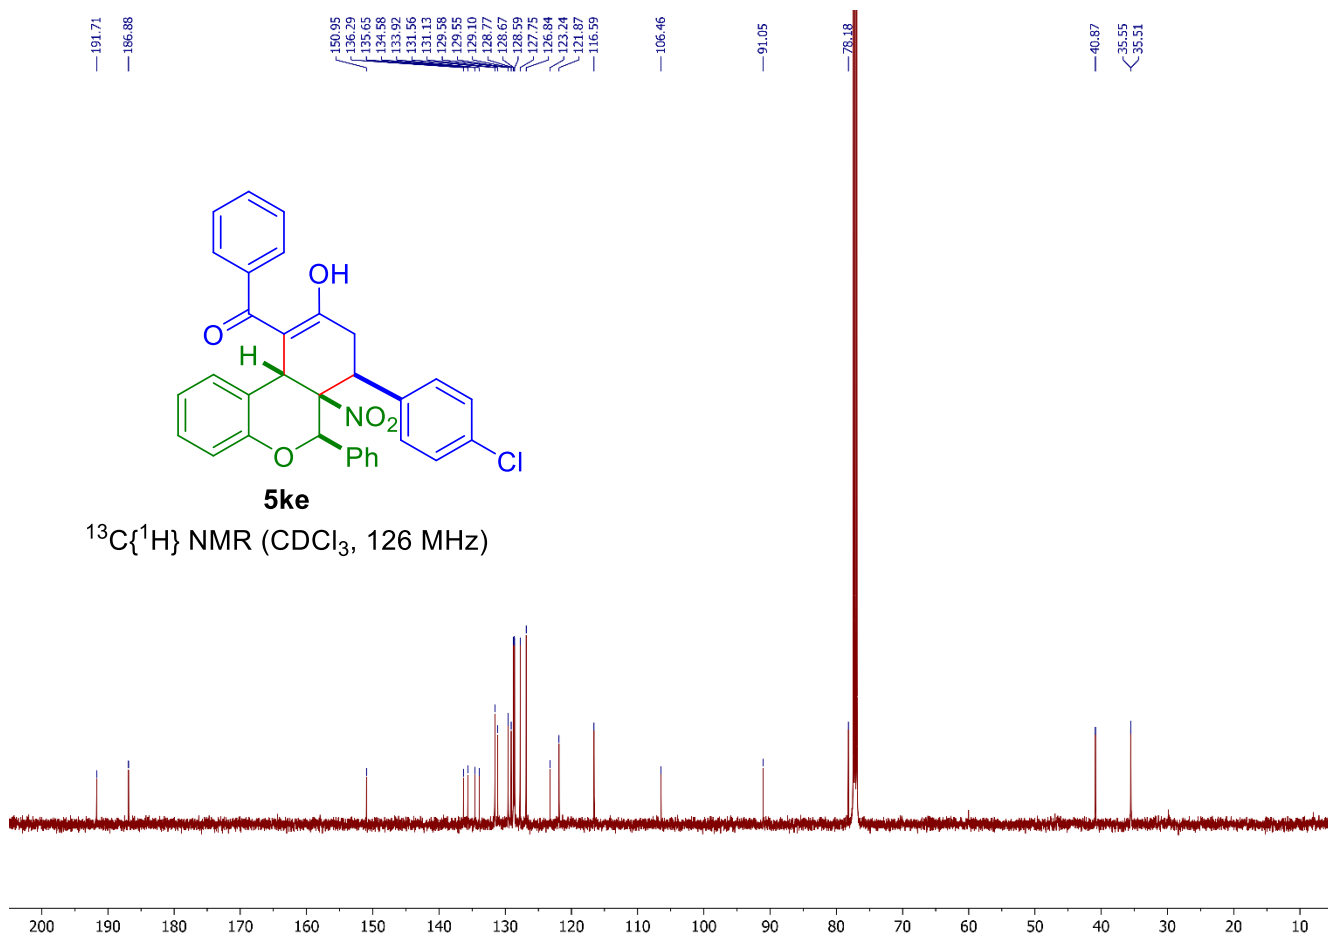



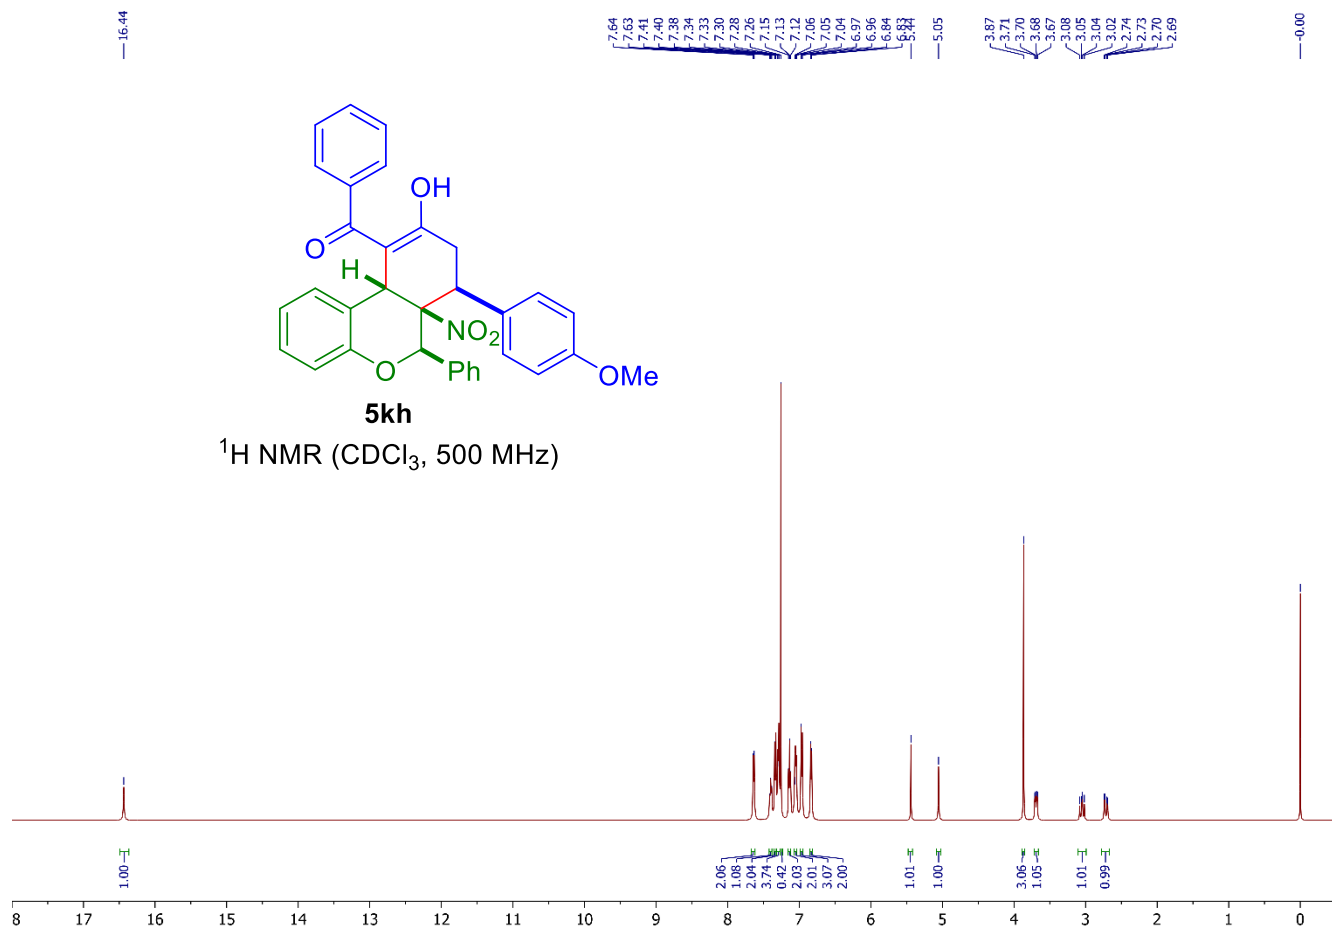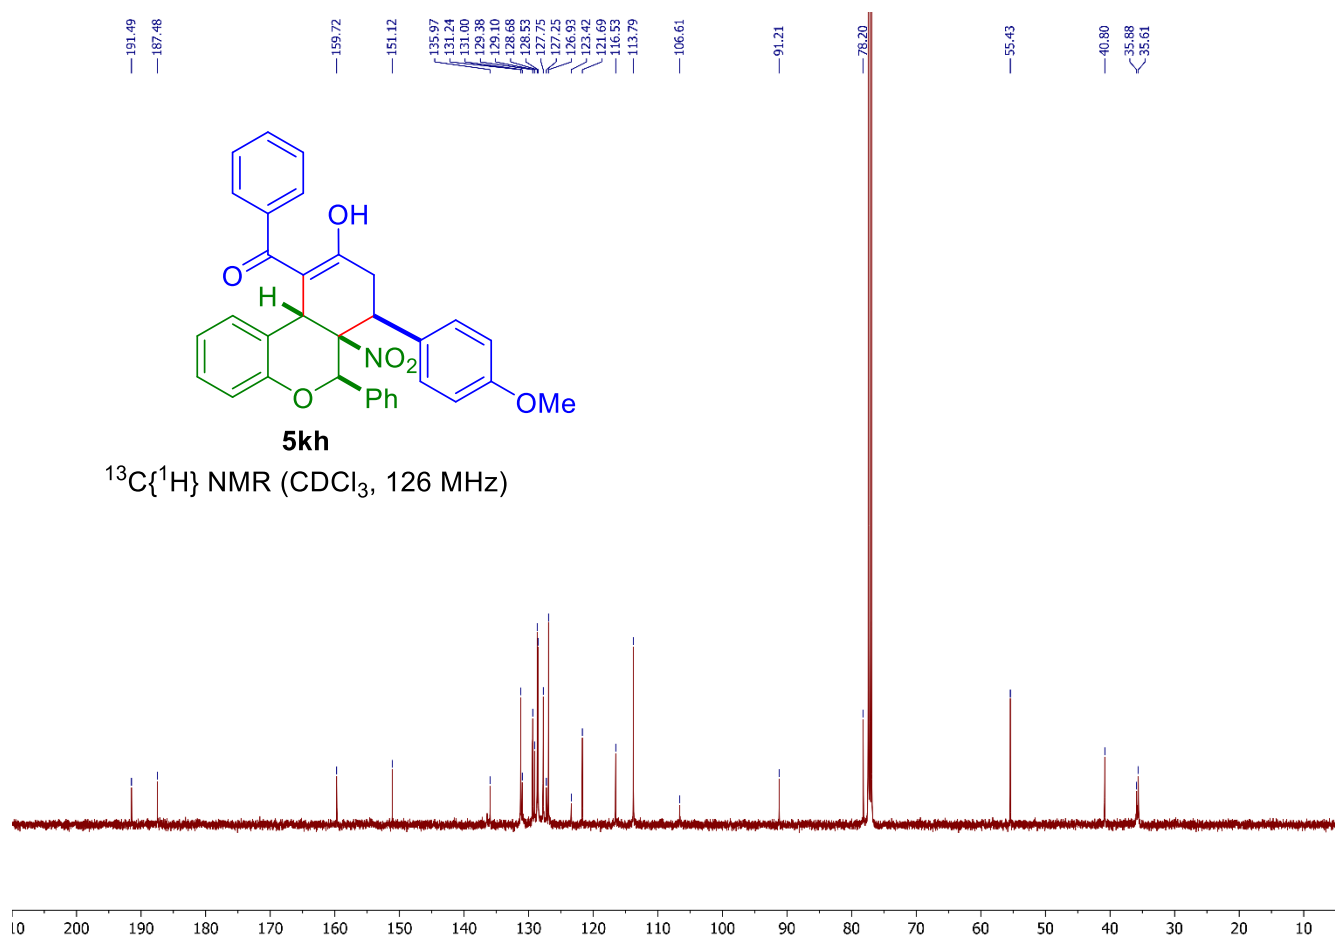

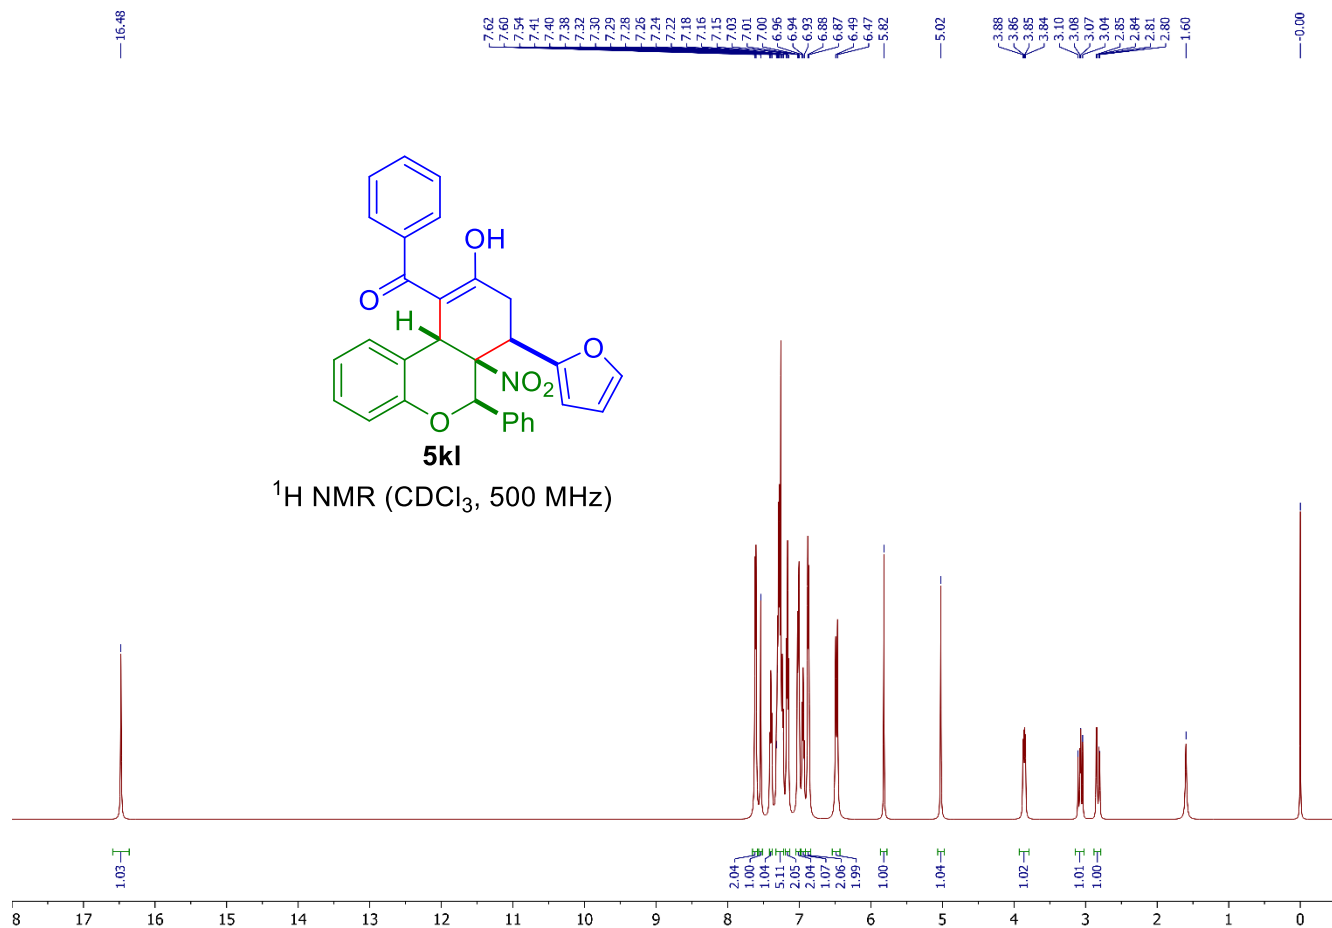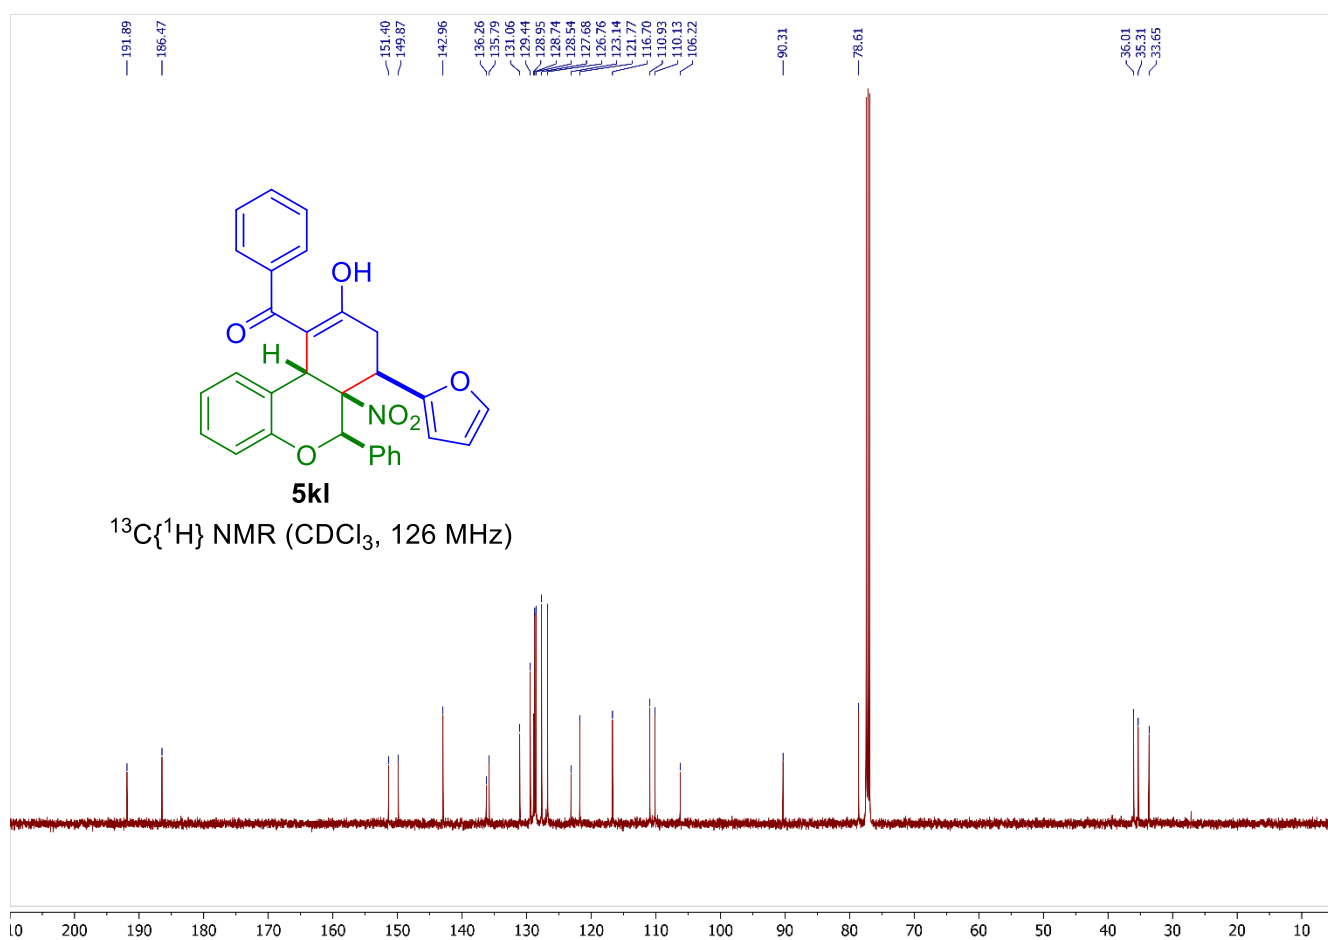

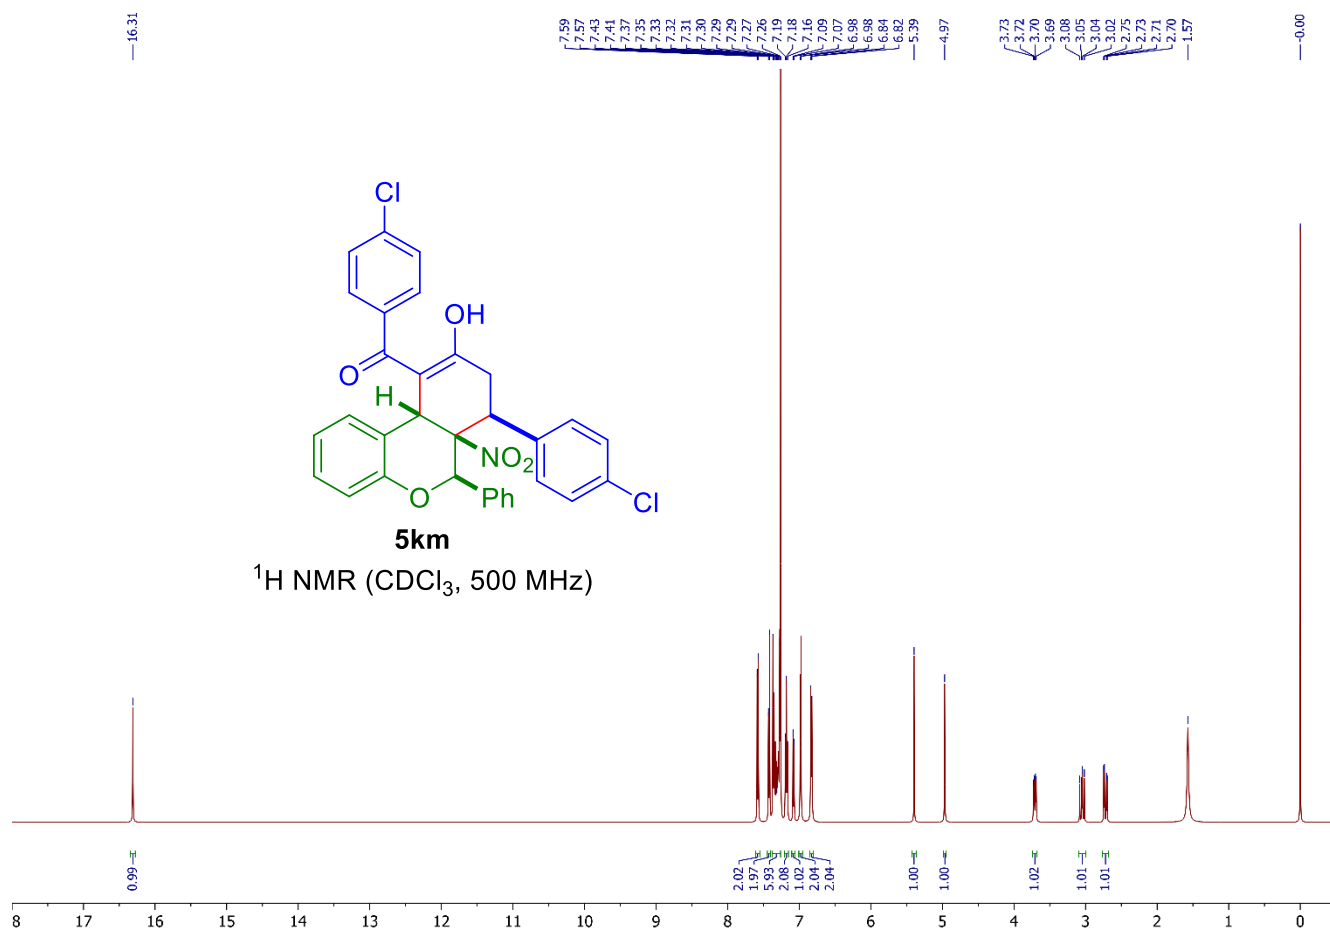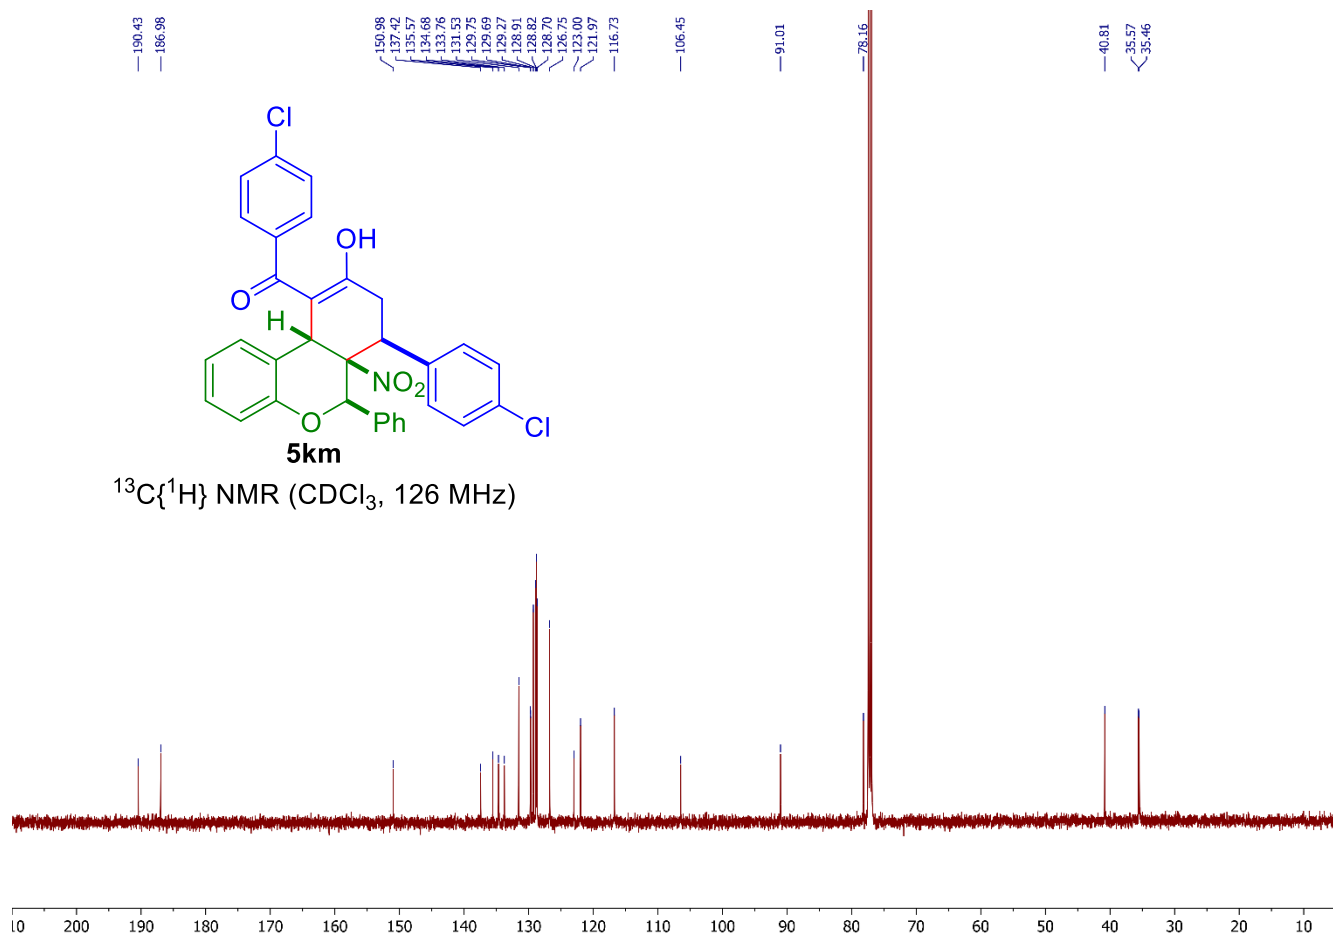

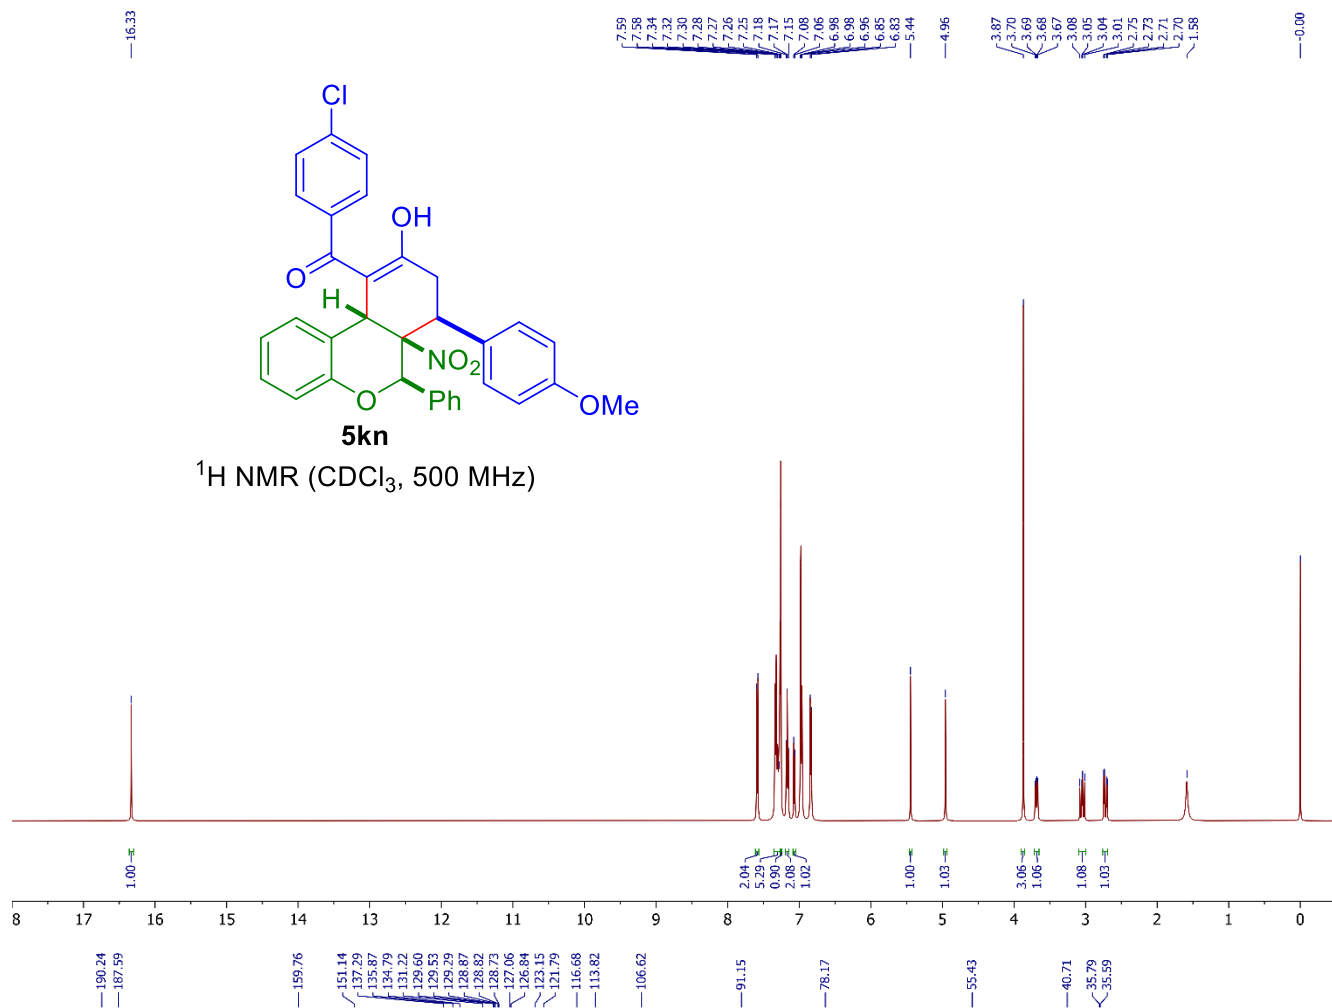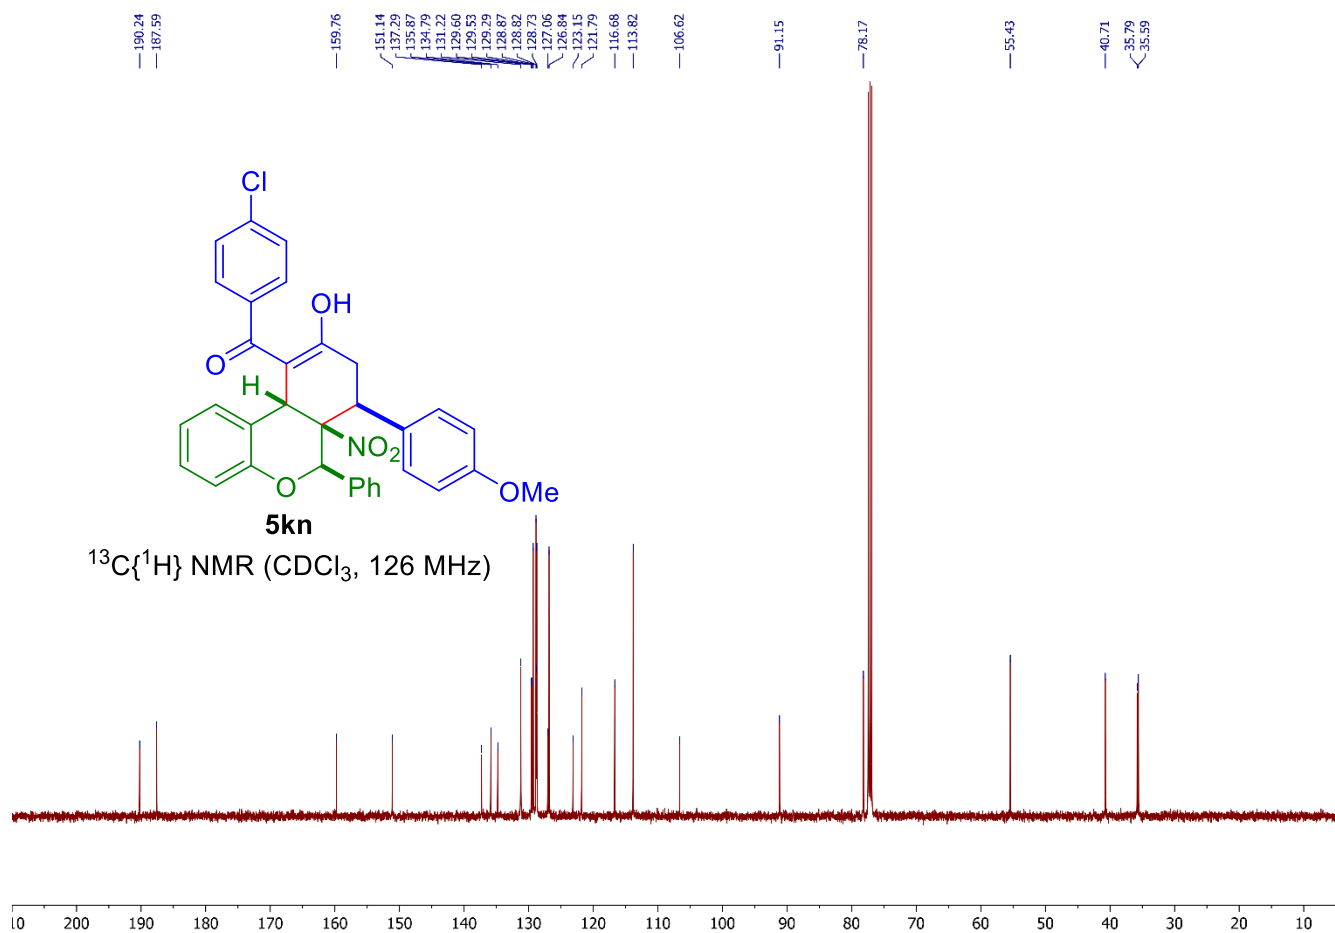

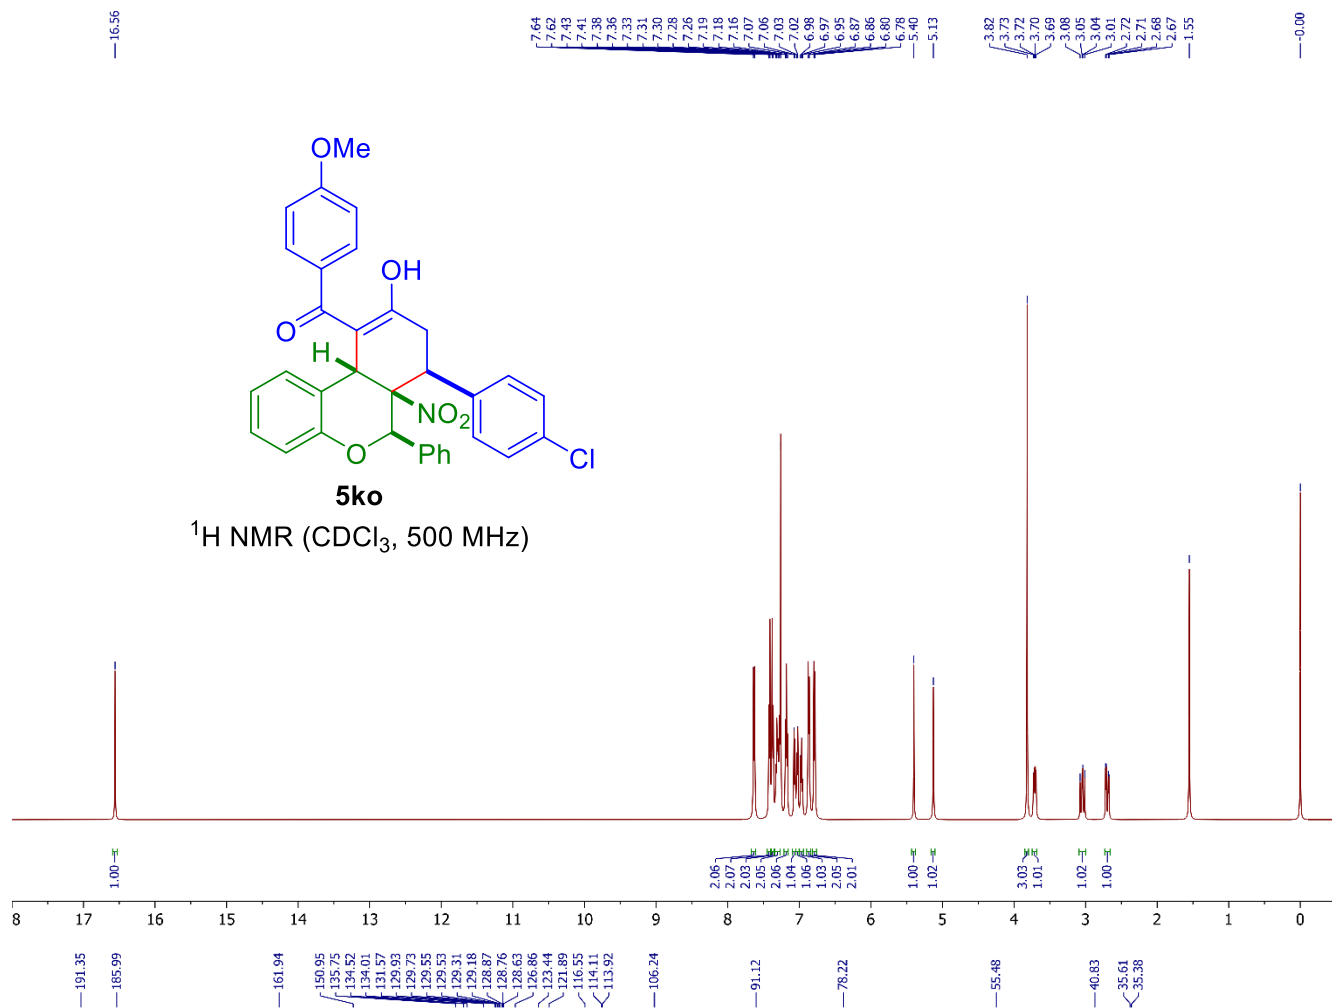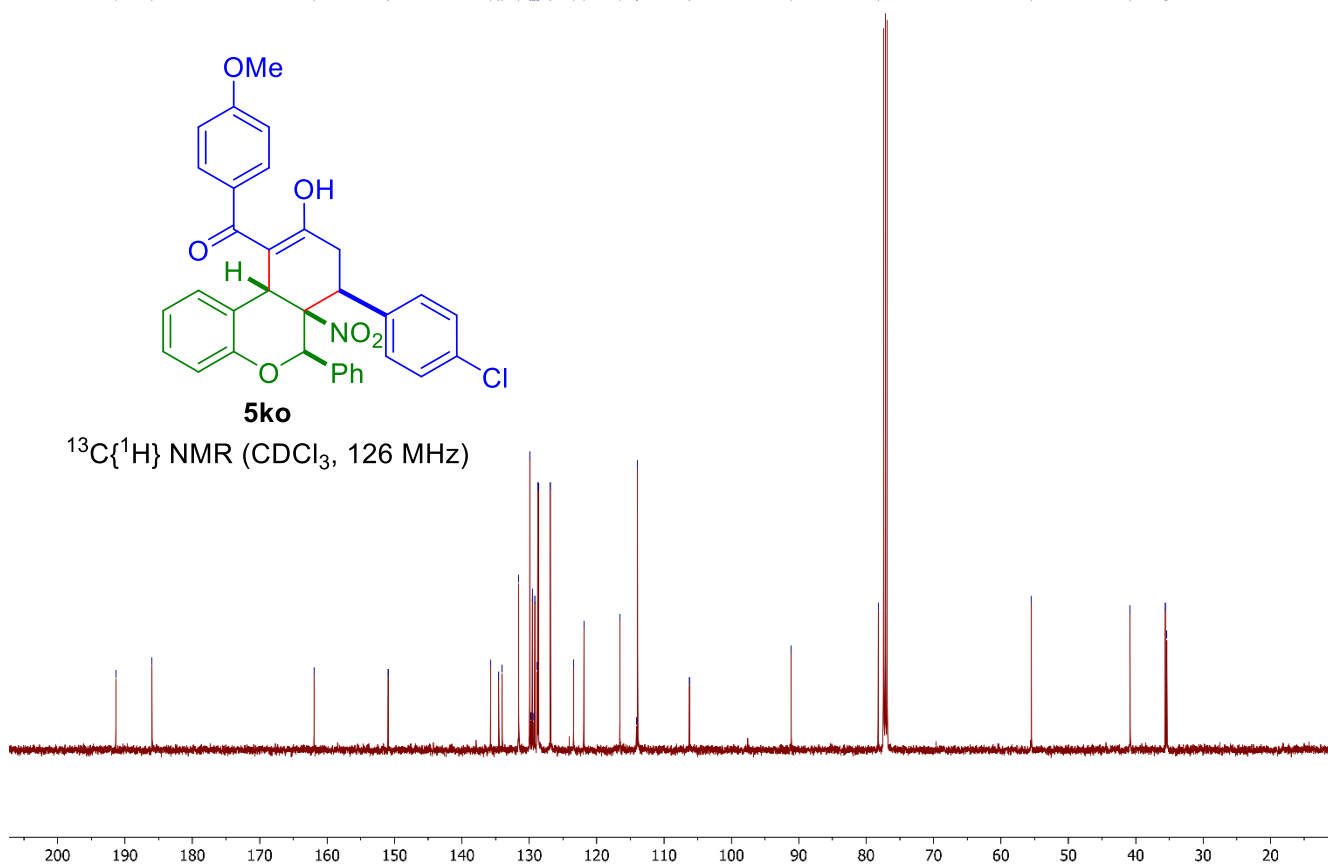

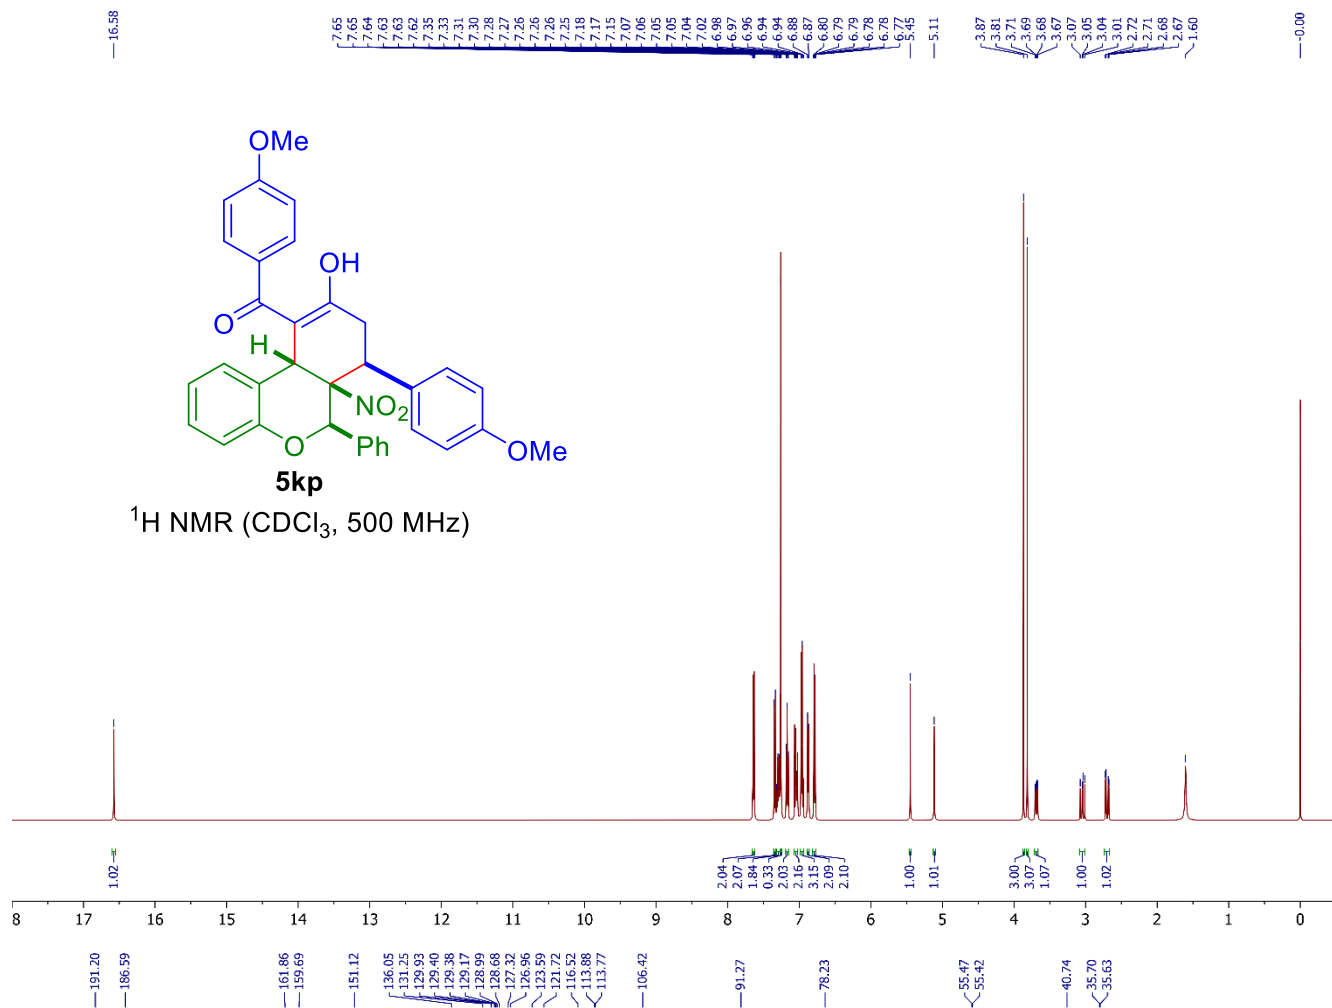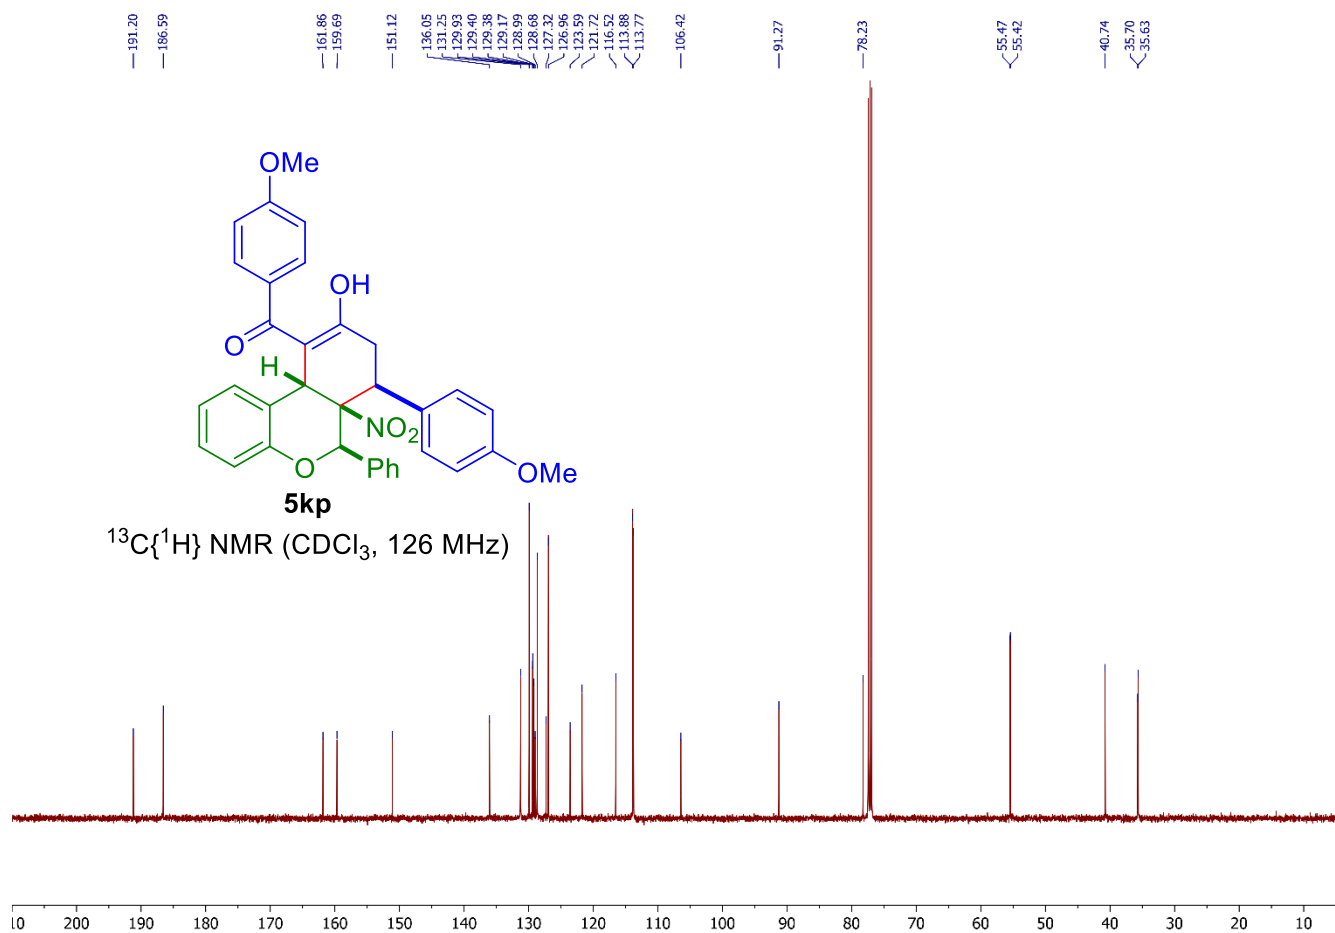

—16.19

7.43  
7.42  
7.41  
7.31  
7.30  
7.29  
7.26  
7.25  
7.24  
7.12  
7.10  
6.98  
6.97  
6.97  
4.91  
4.90  
4.89  
4.87  
4.73  
3.62  
3.61  
3.60  
3.59  
2.96  
2.93  
2.92  
2.89  
2.88  
2.87  
2.85  
2.84  
2.88

—0.00

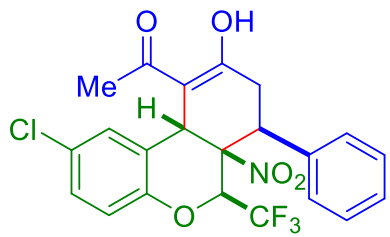

**5bq**

<sup>1</sup>H NMR (CDCl<sub>3</sub>, 500 MHz)

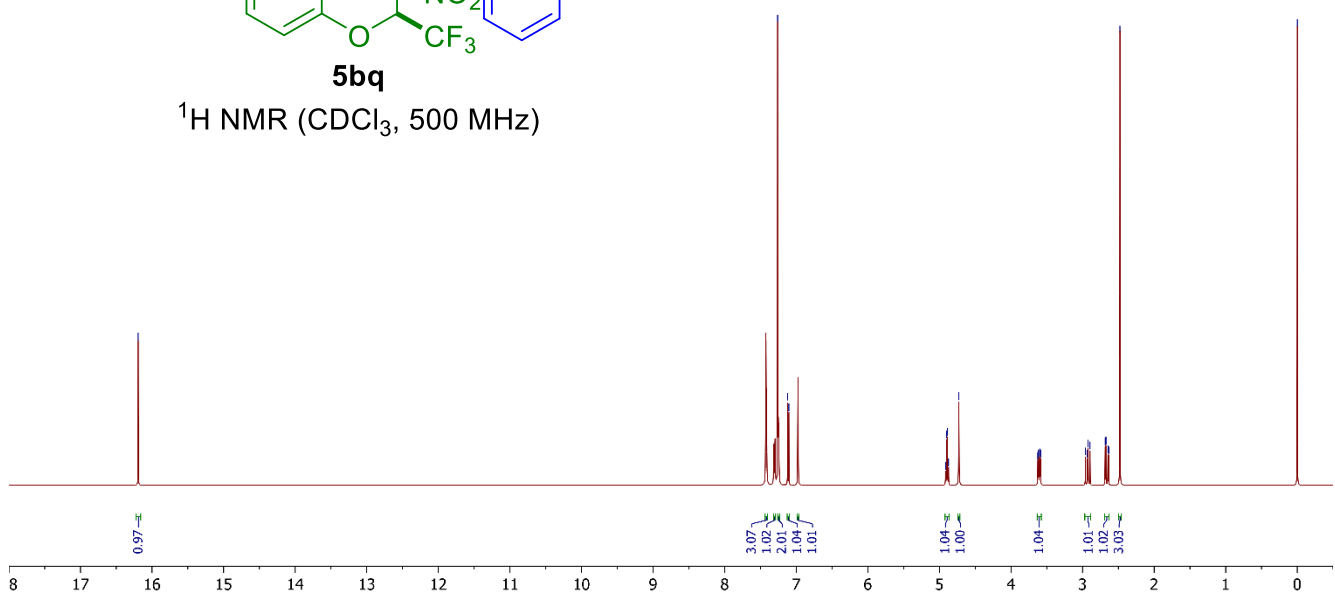

—195.48

—183.02

—147.89

133.78  
129.93  
129.86  
129.39  
128.84  
128.64  
128.55  
128.32  
126.06  
124.23  
124.15  
123.35  
120.34  
118.63  
106.72

—84.99

74.18  
73.98  
73.77  
73.56

—41.72

—36.83

—34.22

—24.12

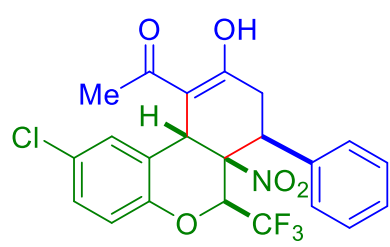

**5bq**

<sup>13</sup>C{<sup>1</sup>H} NMR (CDCl<sub>3</sub>, 151 MHz)

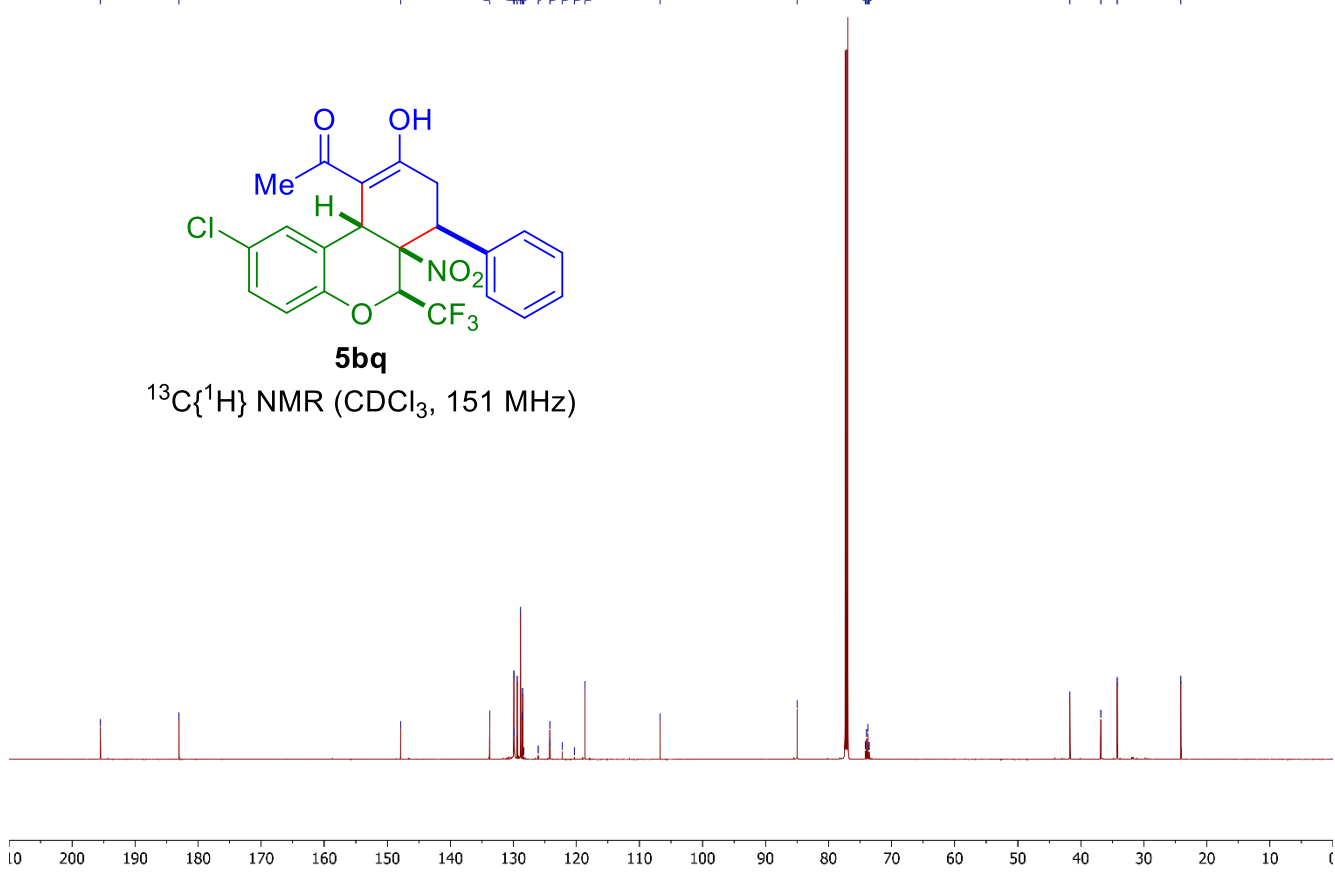

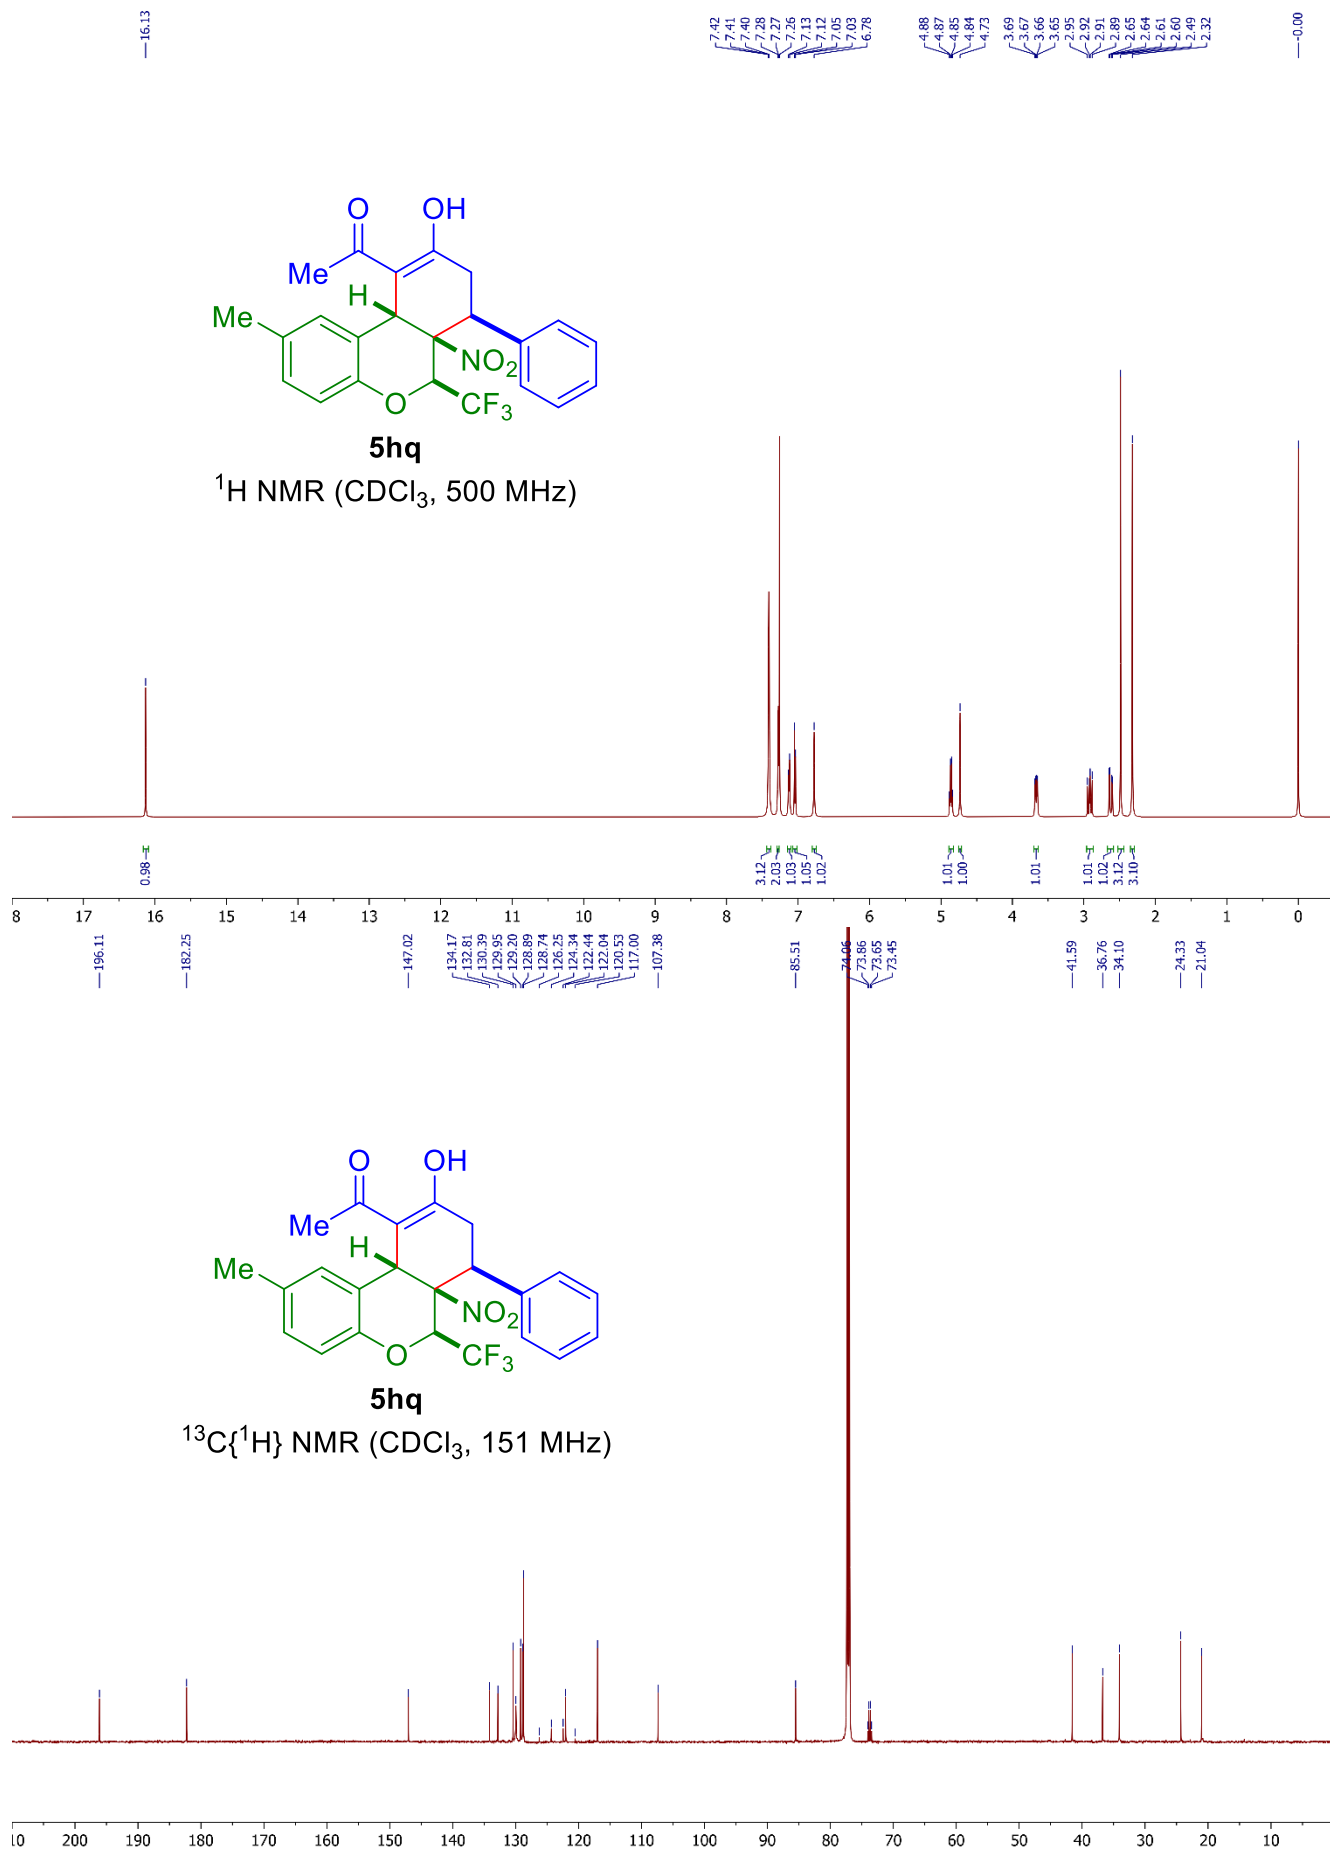



—16.16

7.42  
7.41  
7.40  
7.29  
7.28  
7.26  
7.25  
7.24  
7.10  
7.08  
6.89  
6.88  
6.87  
6.87  
6.55  
6.54  
4.87  
4.85  
4.84  
4.83  
4.74  
3.78  
3.70  
3.69  
3.67  
3.66  
2.95  
2.91  
2.89  
2.88  
2.65  
2.62  
2.61  
2.48

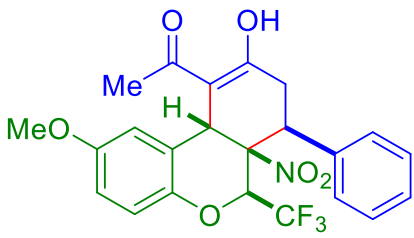

**5iq**

<sup>1</sup>H NMR (CDCl<sub>3</sub>, 500 MHz)

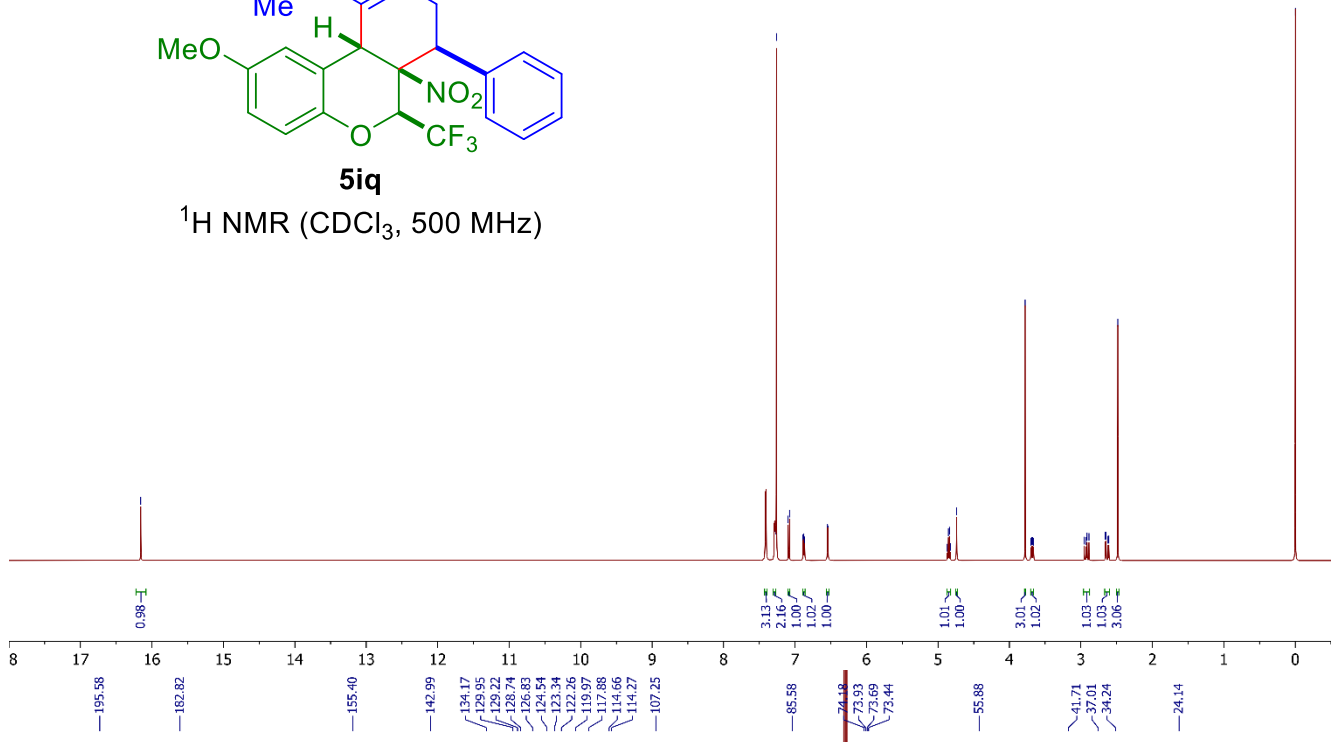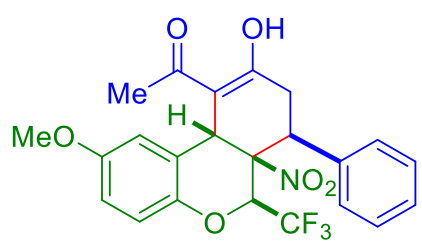

**5iq**

<sup>13</sup>C{<sup>1</sup>H} NMR (CDCl<sub>3</sub>, 126 MHz)

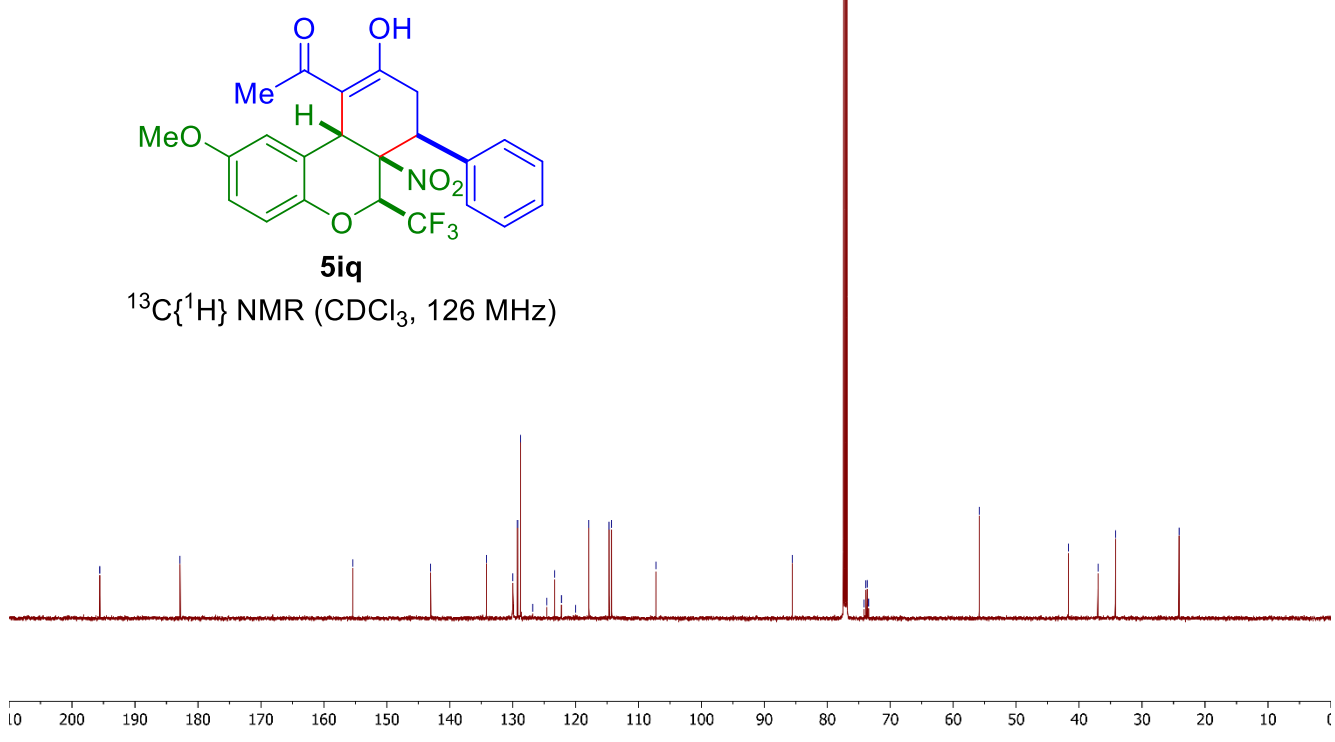

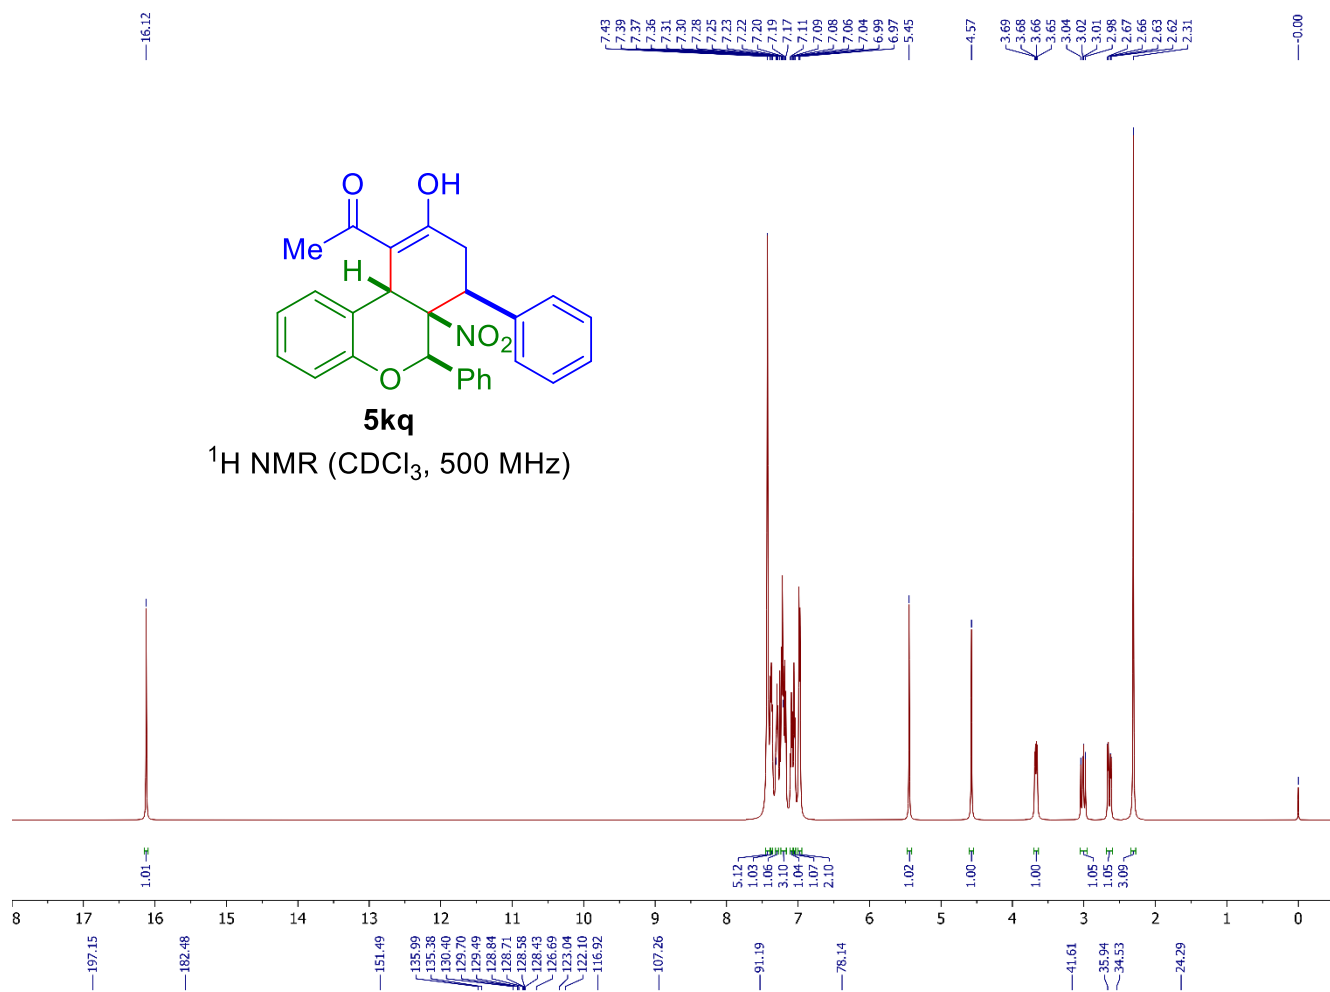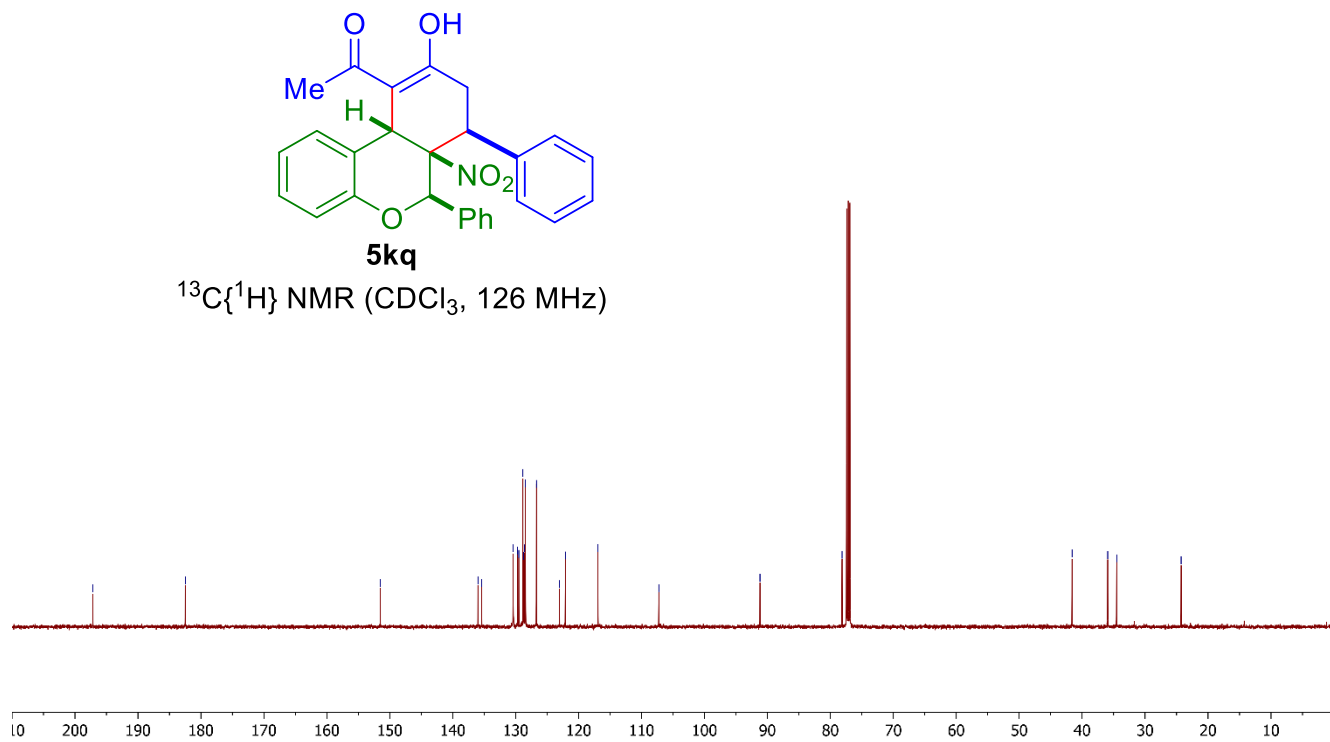

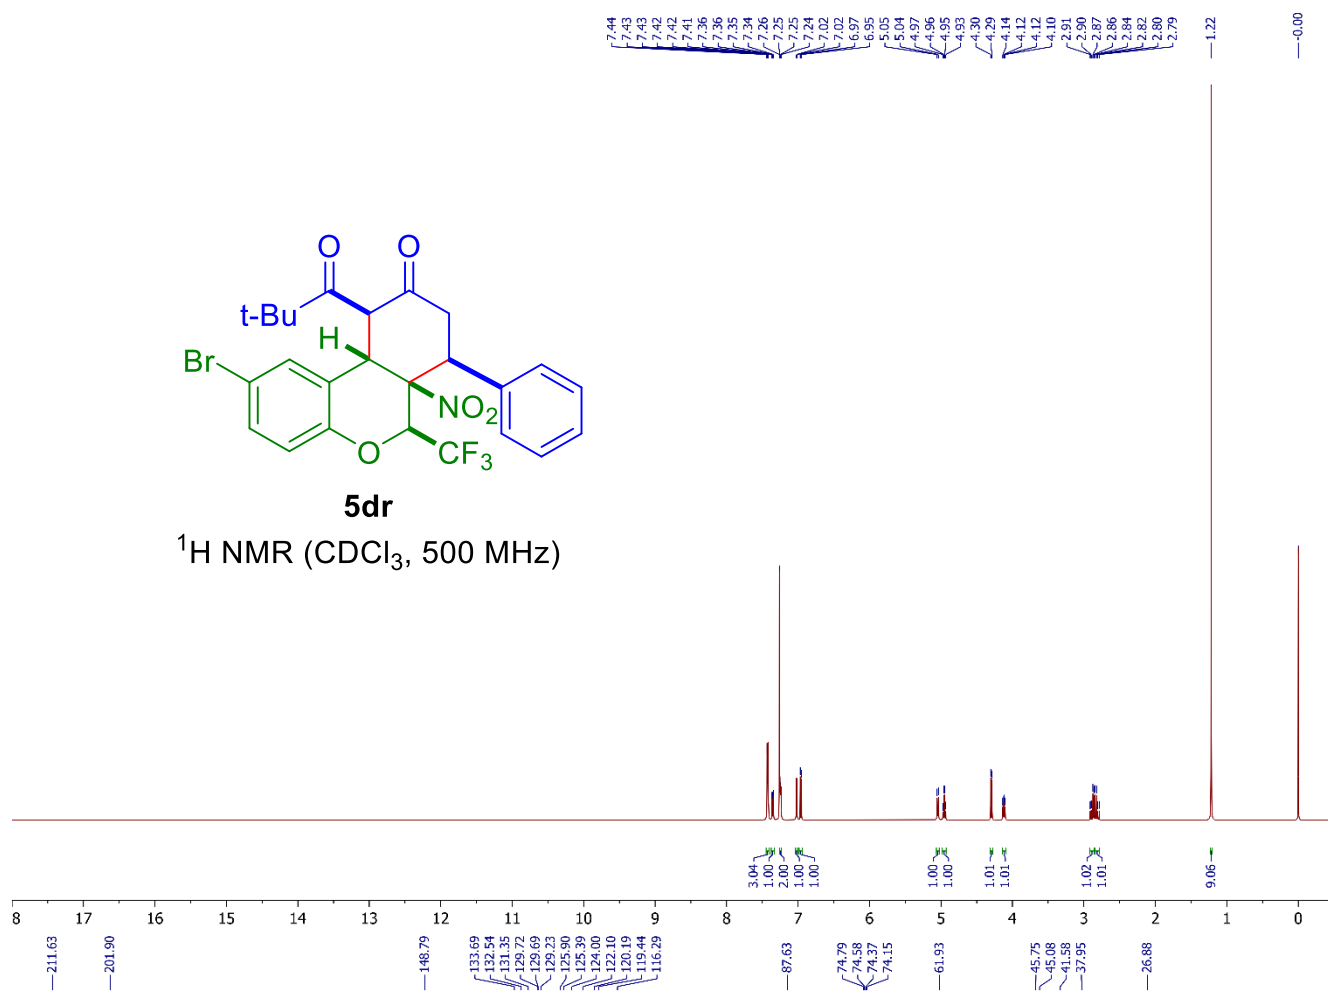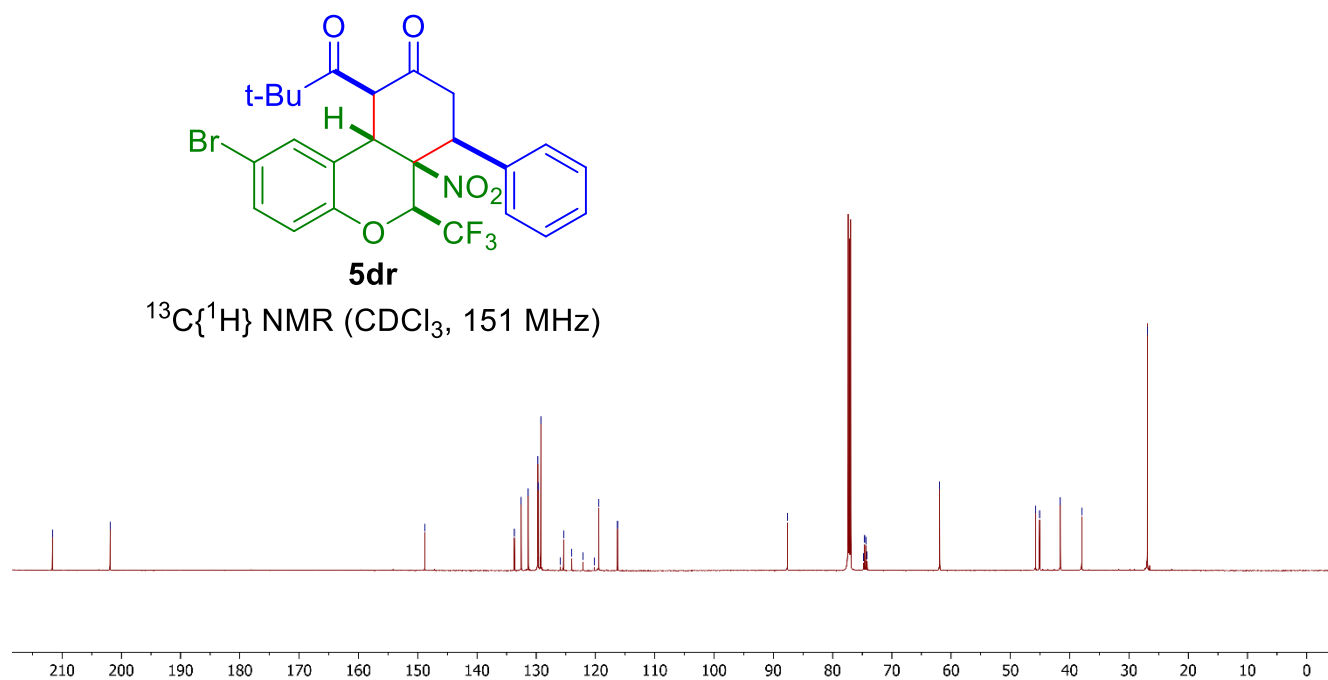

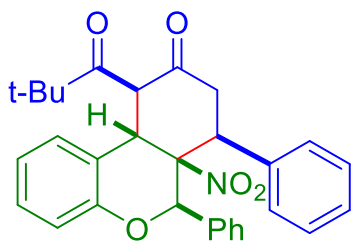

**5kr**

$^1\text{H}$  NMR ( $\text{CDCl}_3$ , 500 MHz)

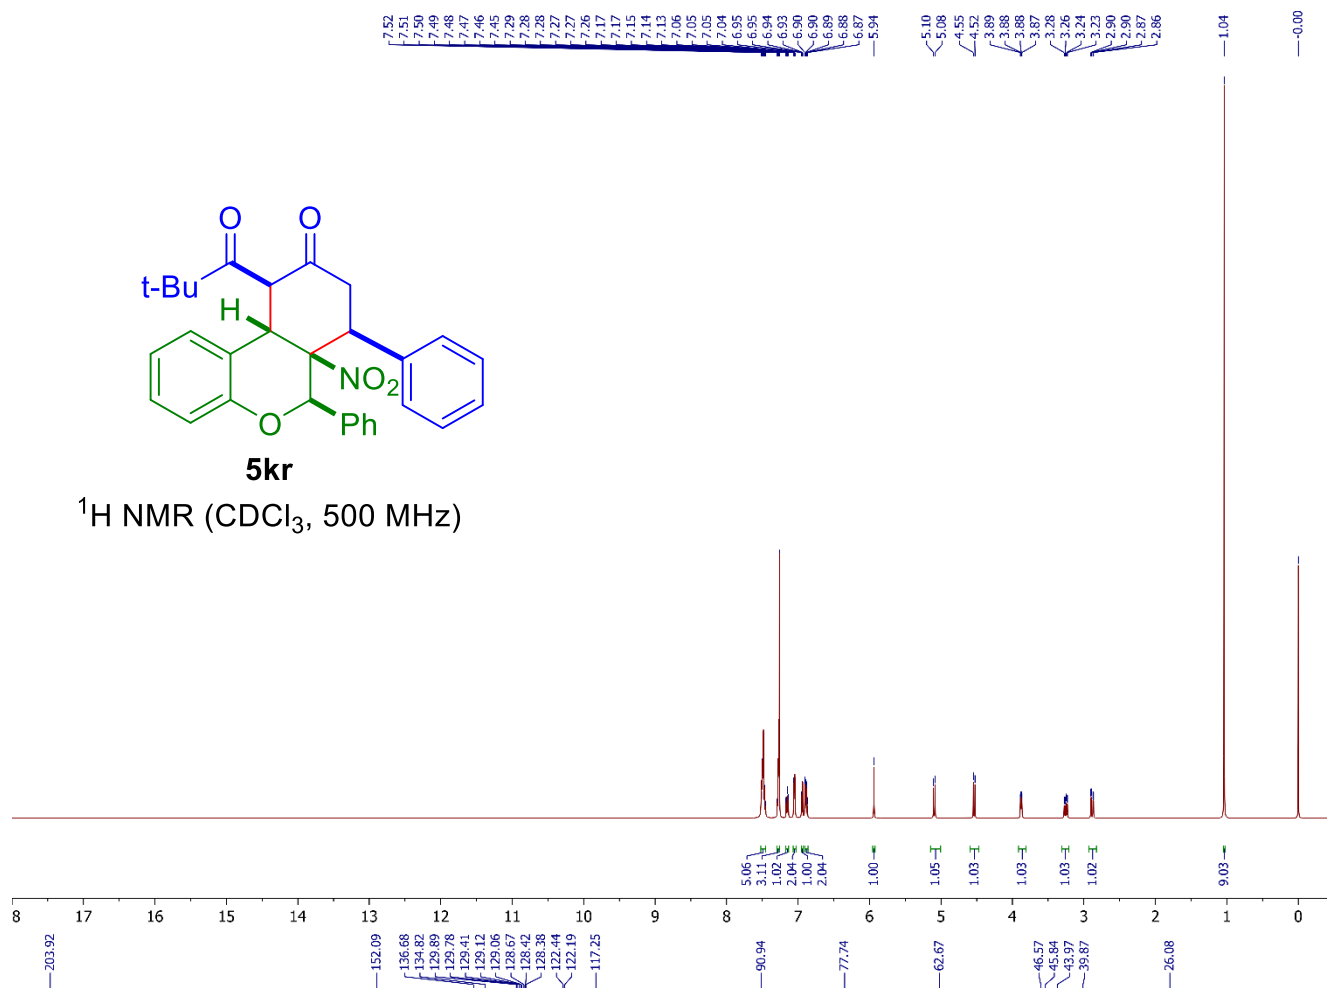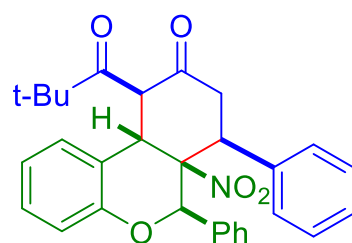

**5kr**

$^{13}\text{C}\{^1\text{H}\}$  NMR ( $\text{CDCl}_3$ , 151 MHz)

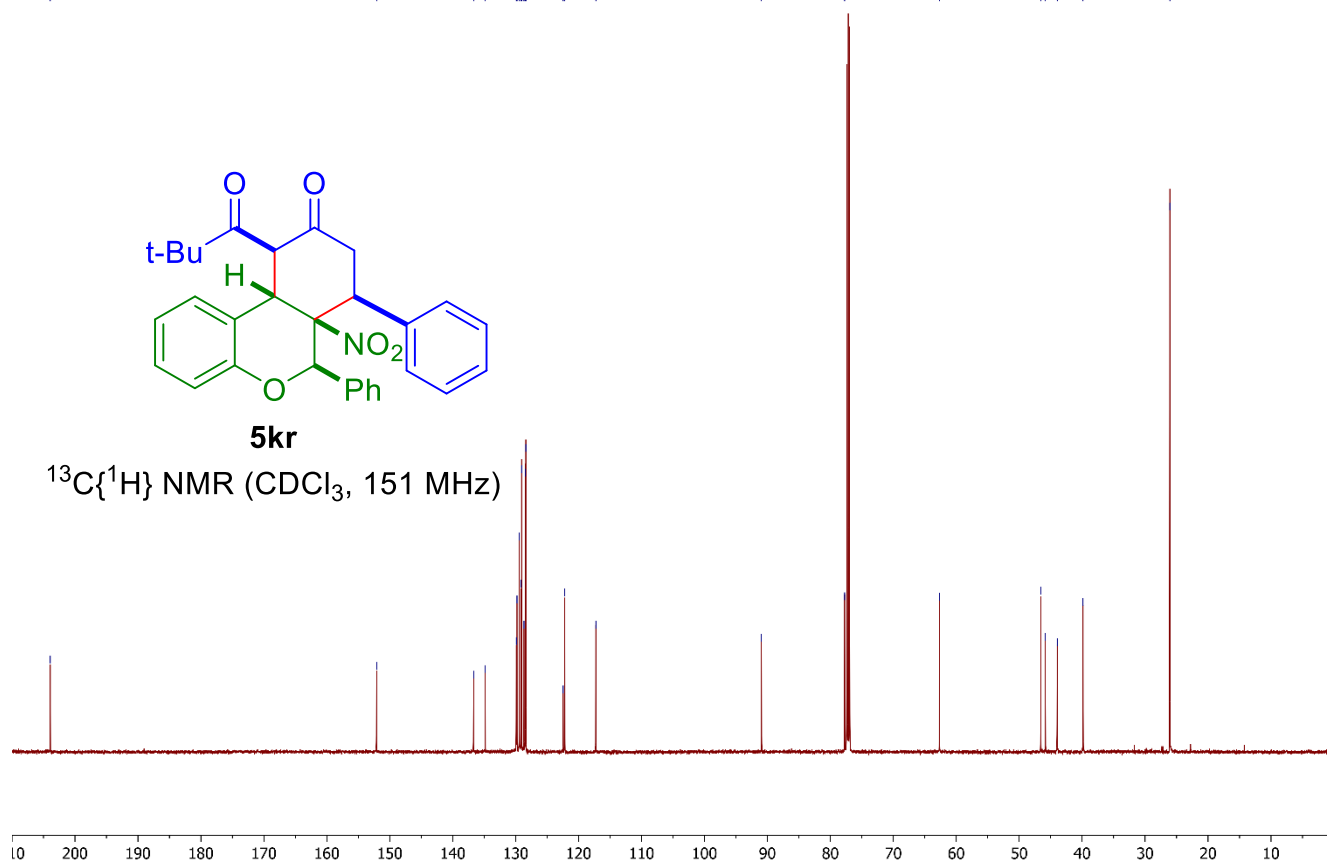

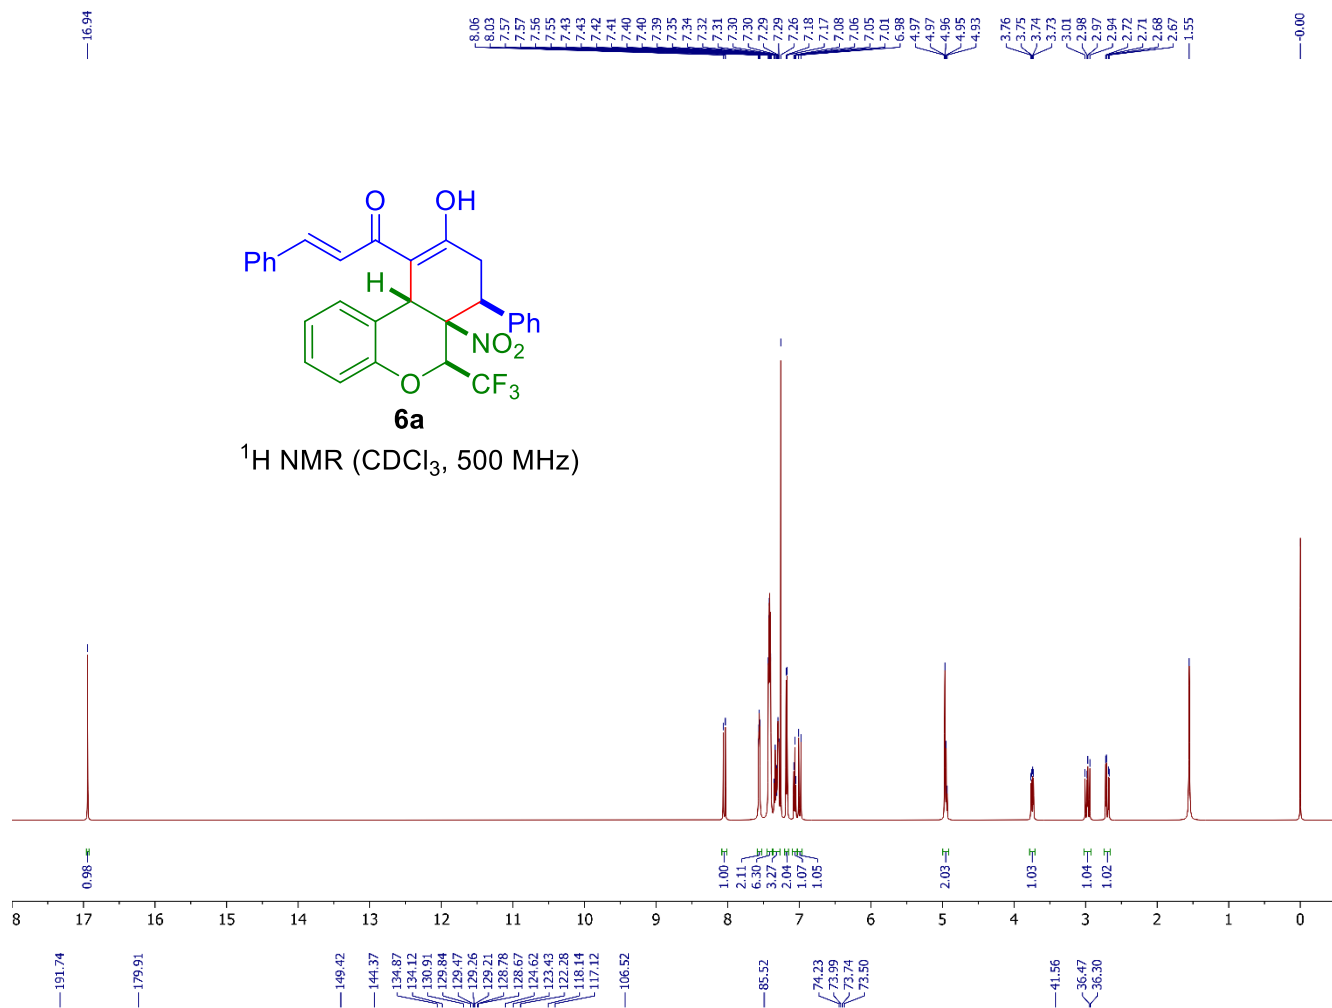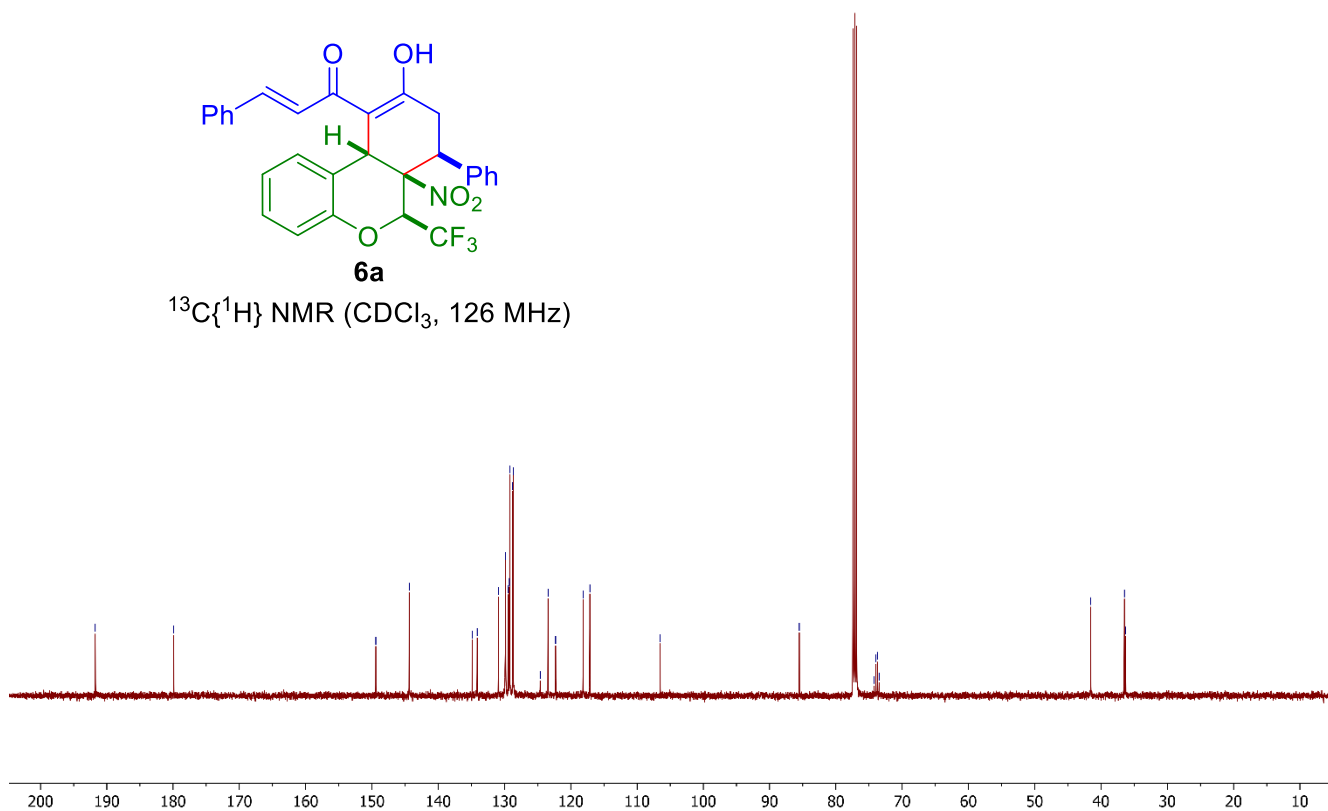

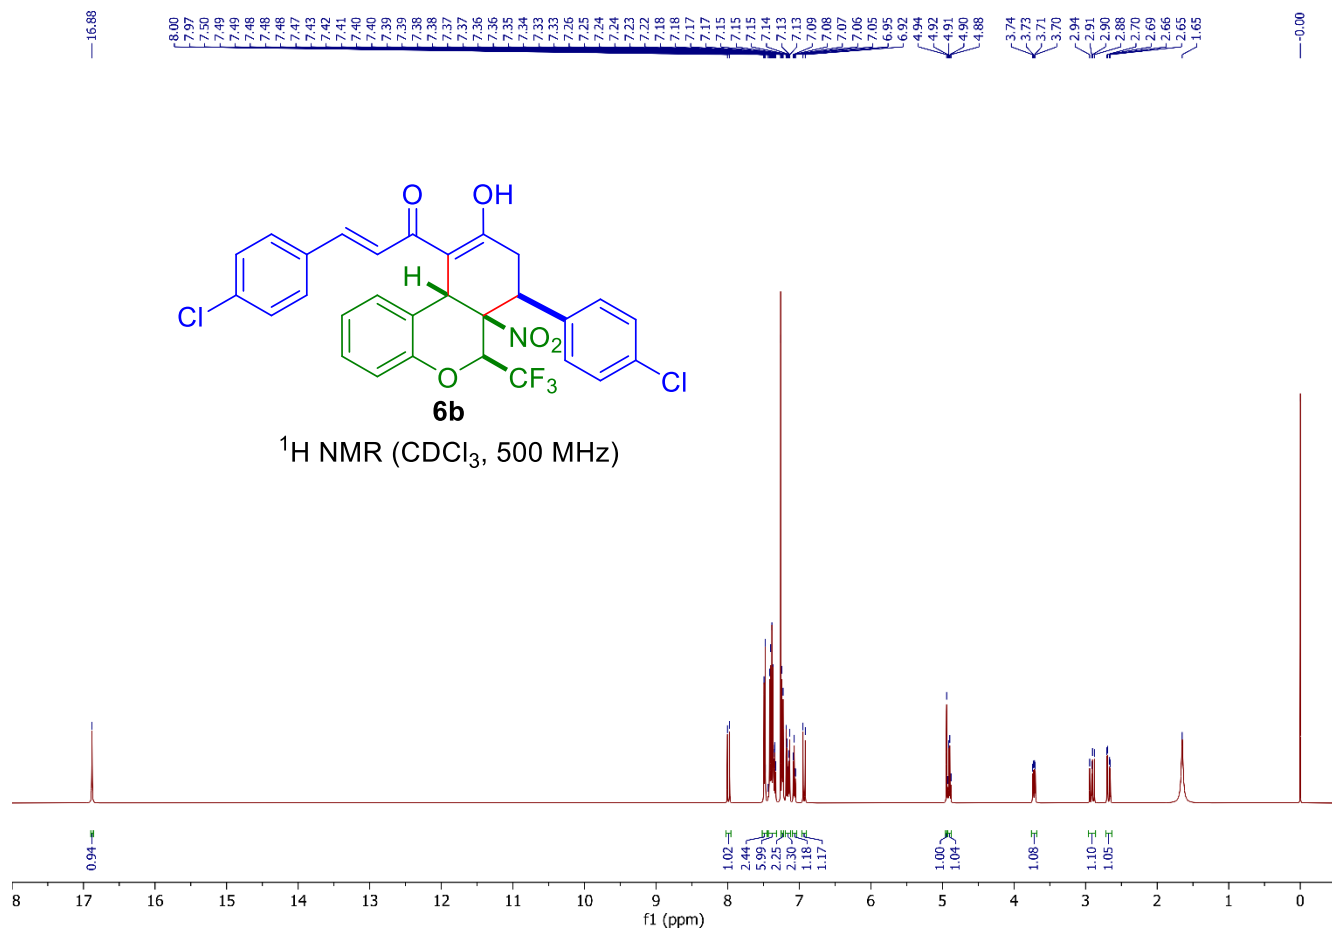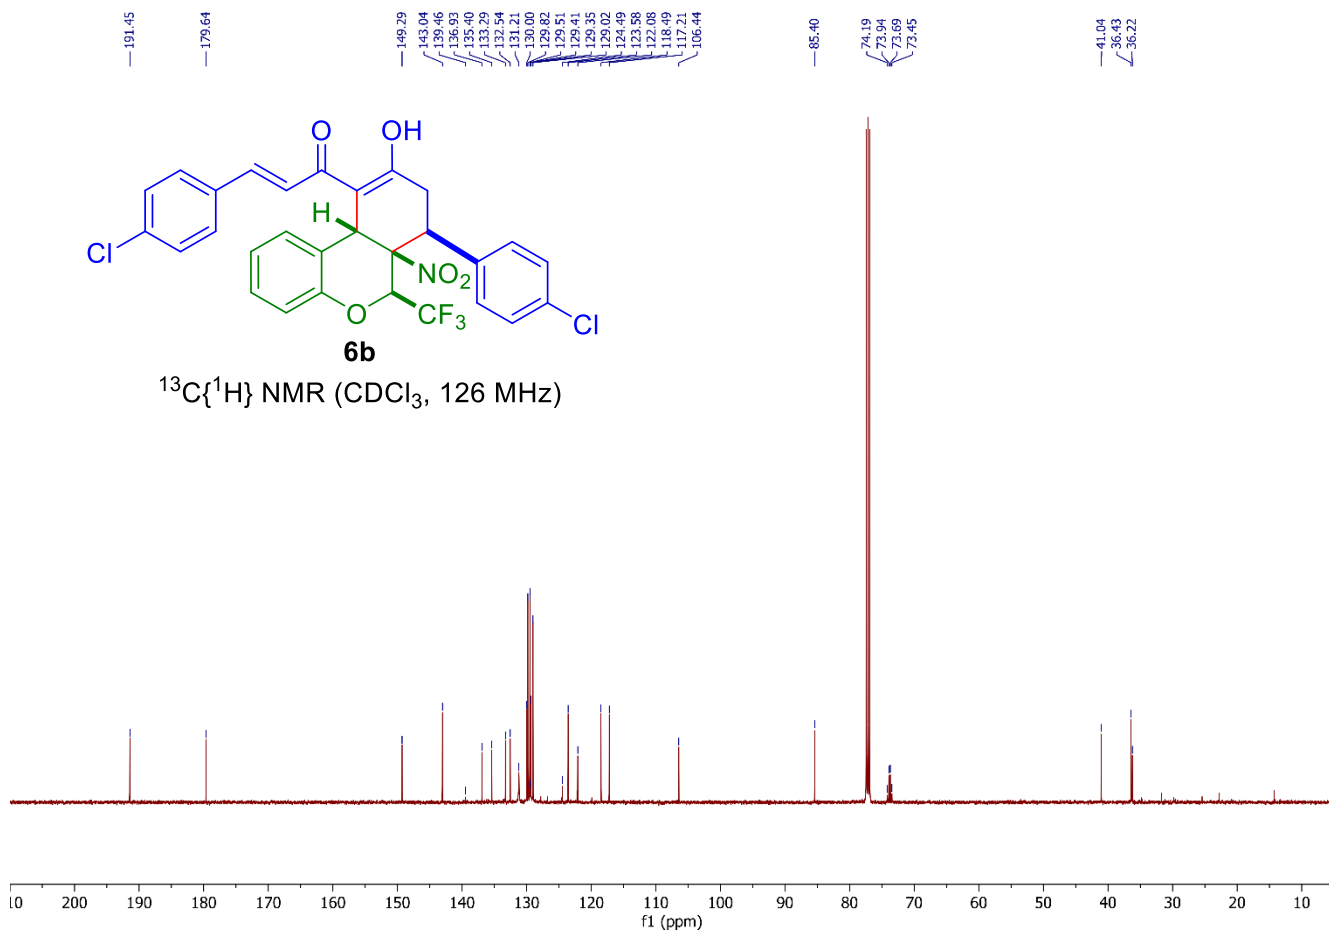

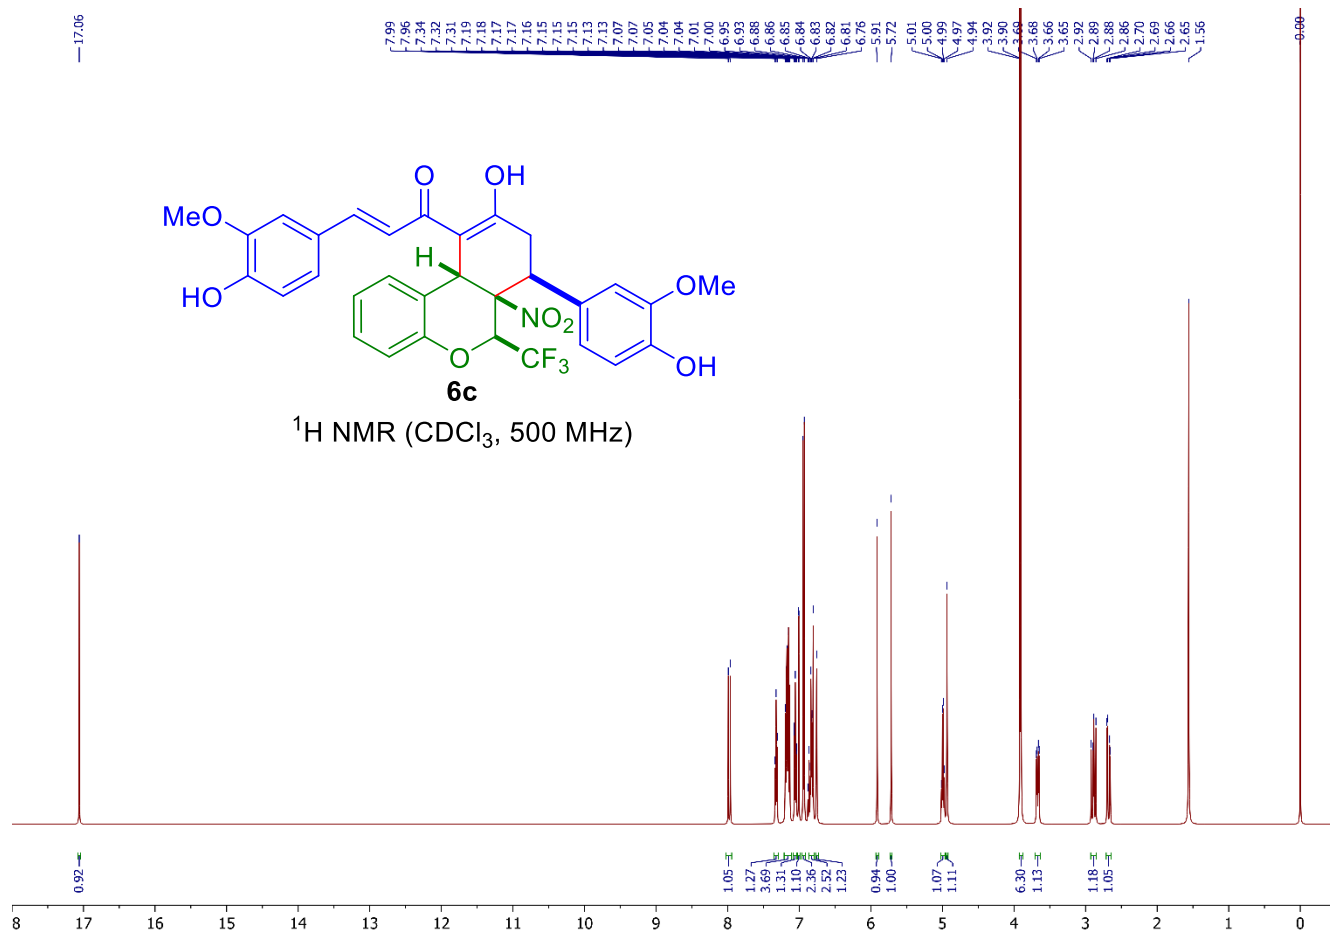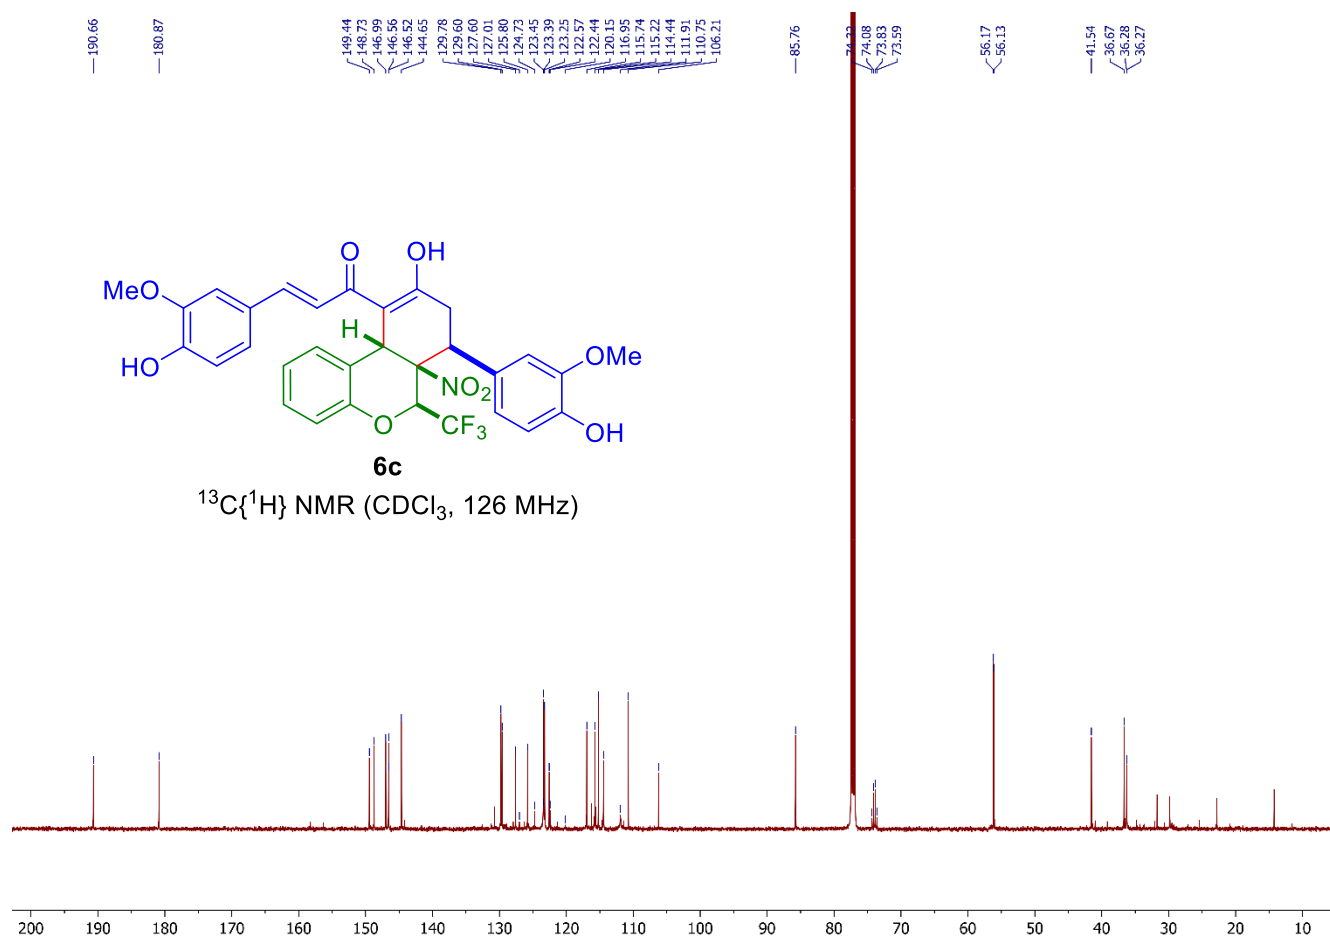

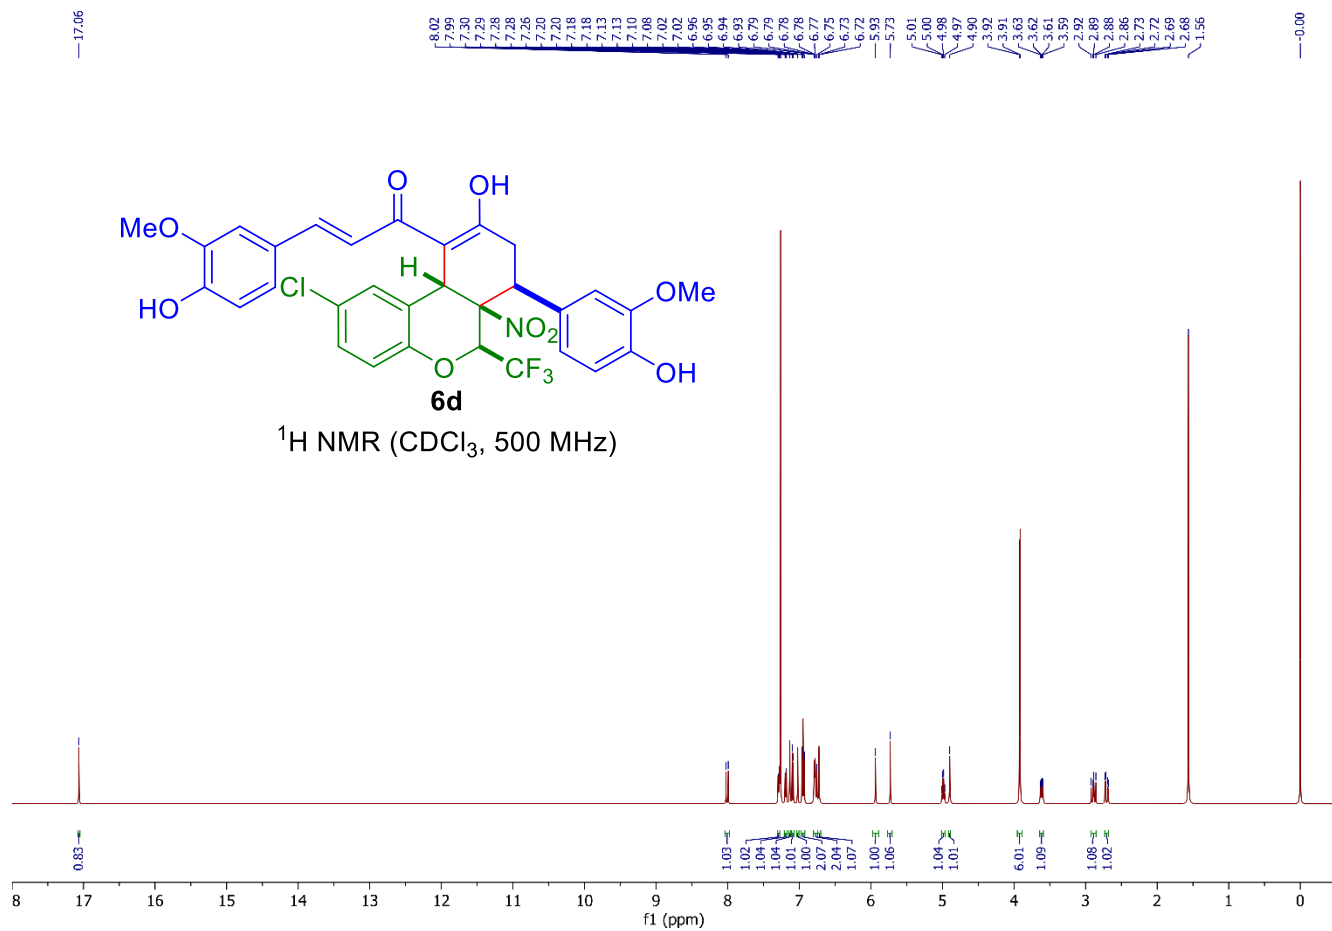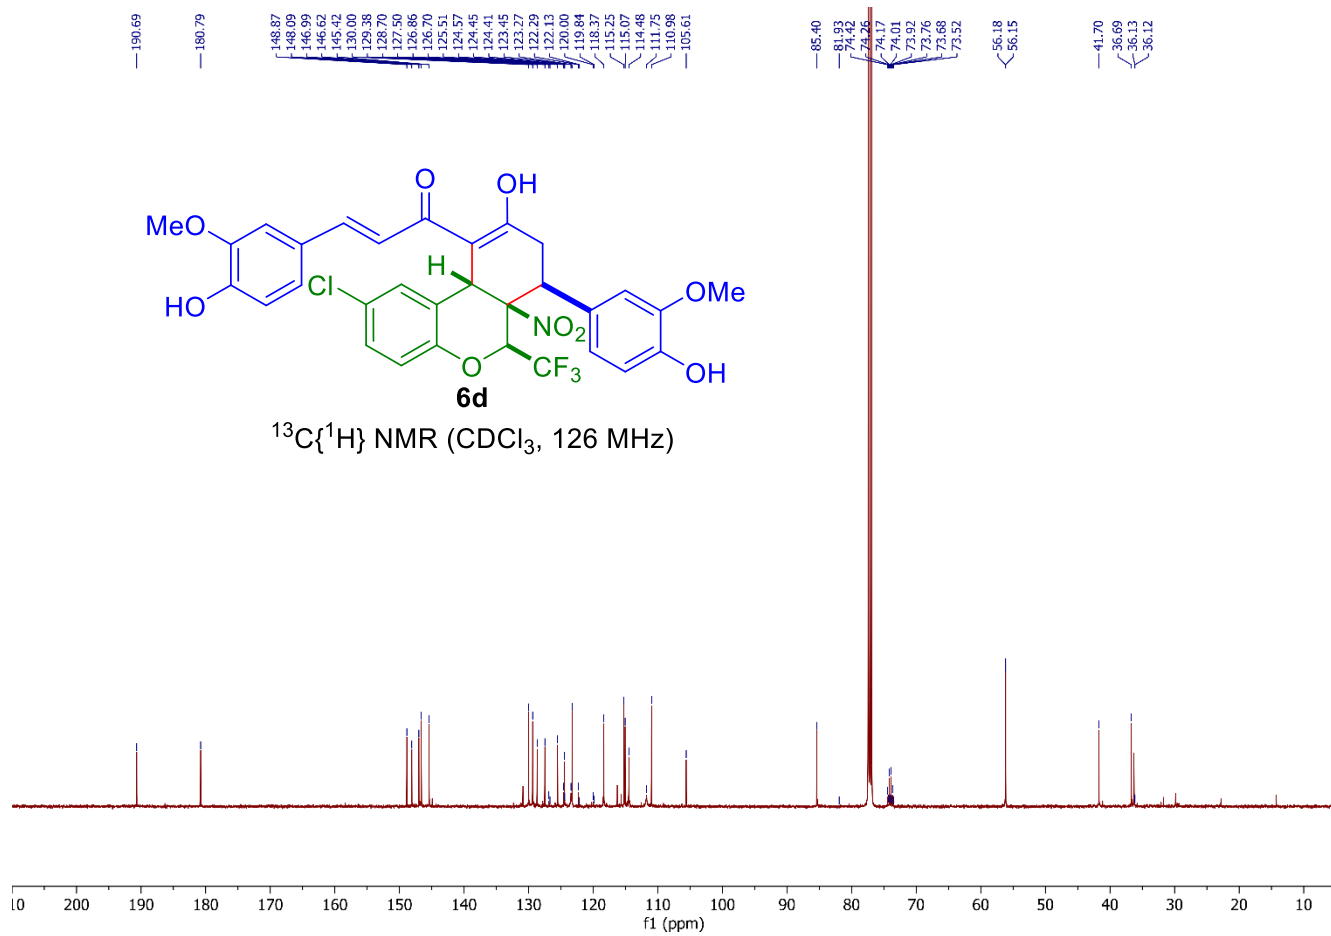



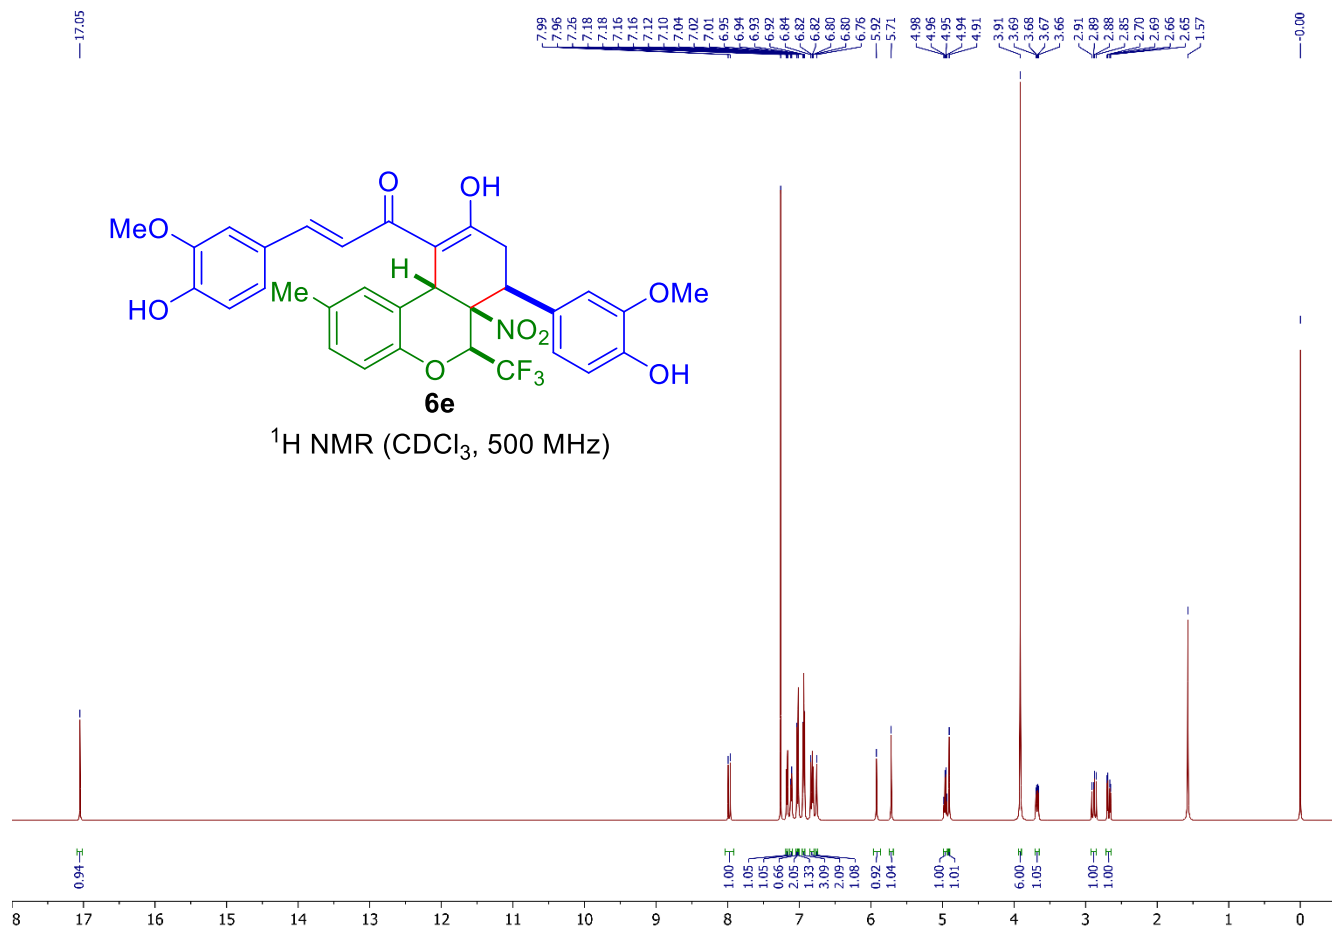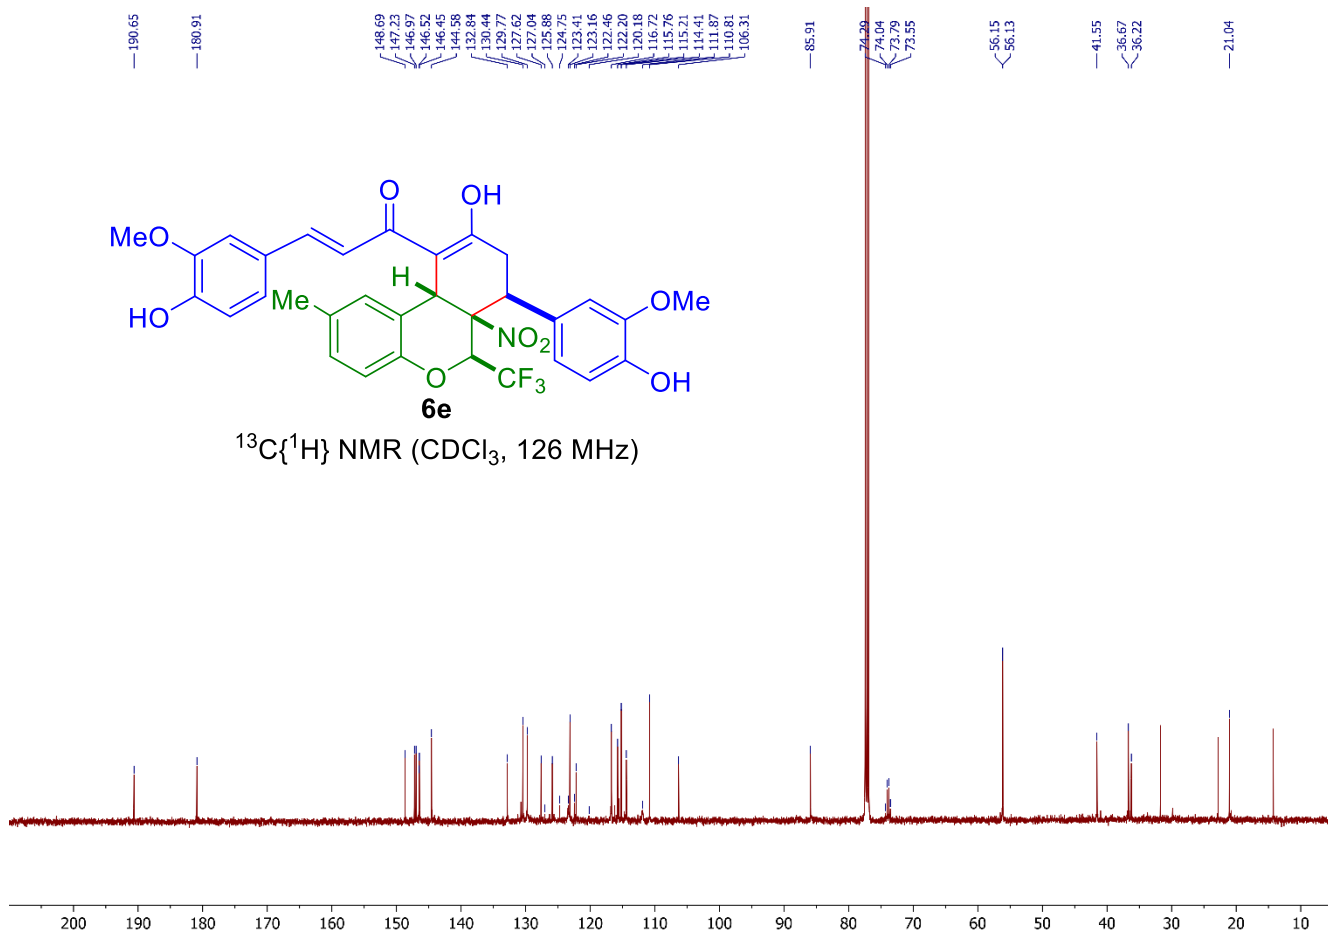

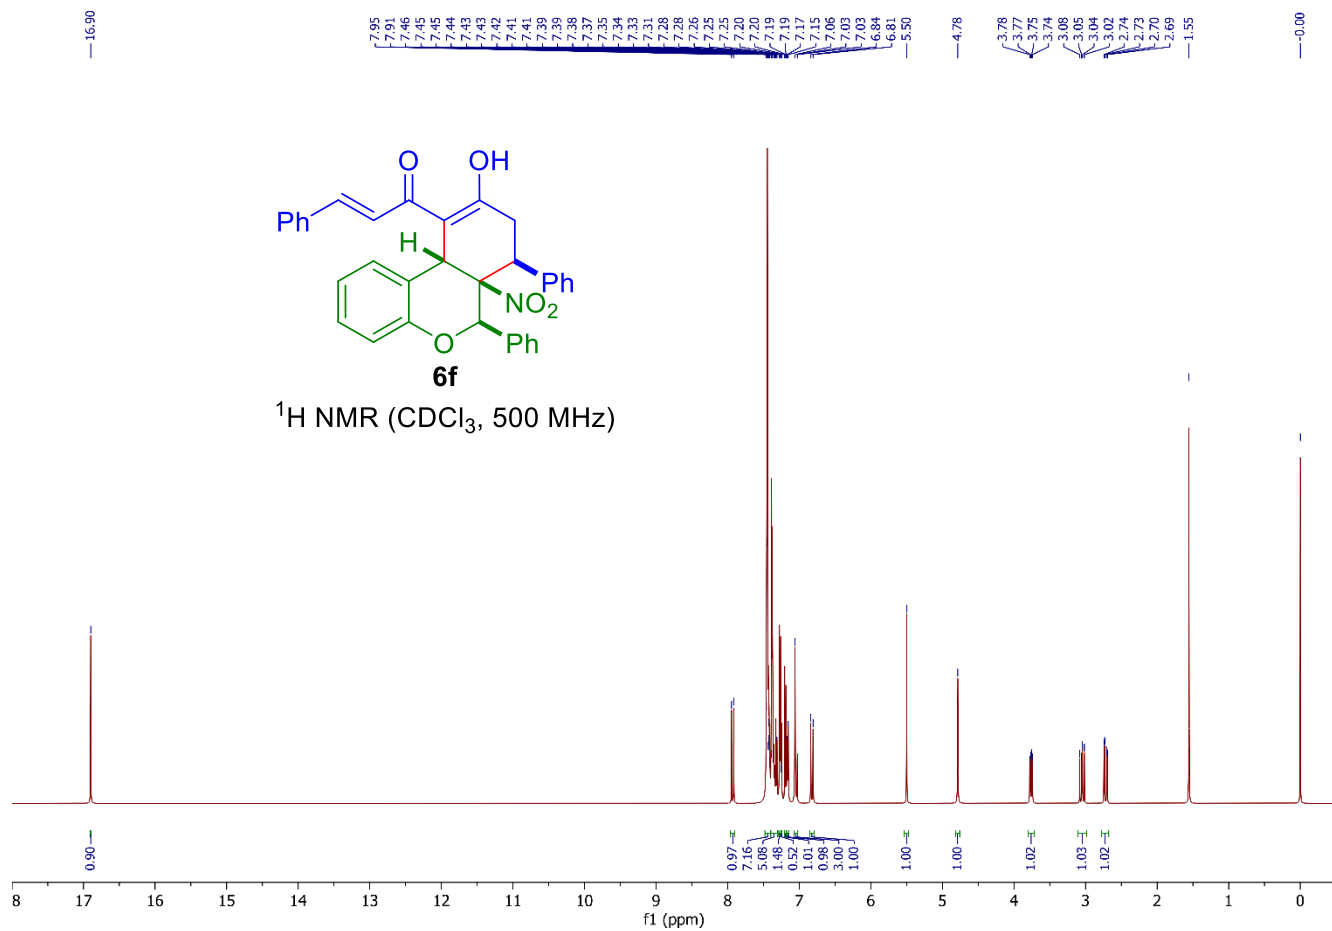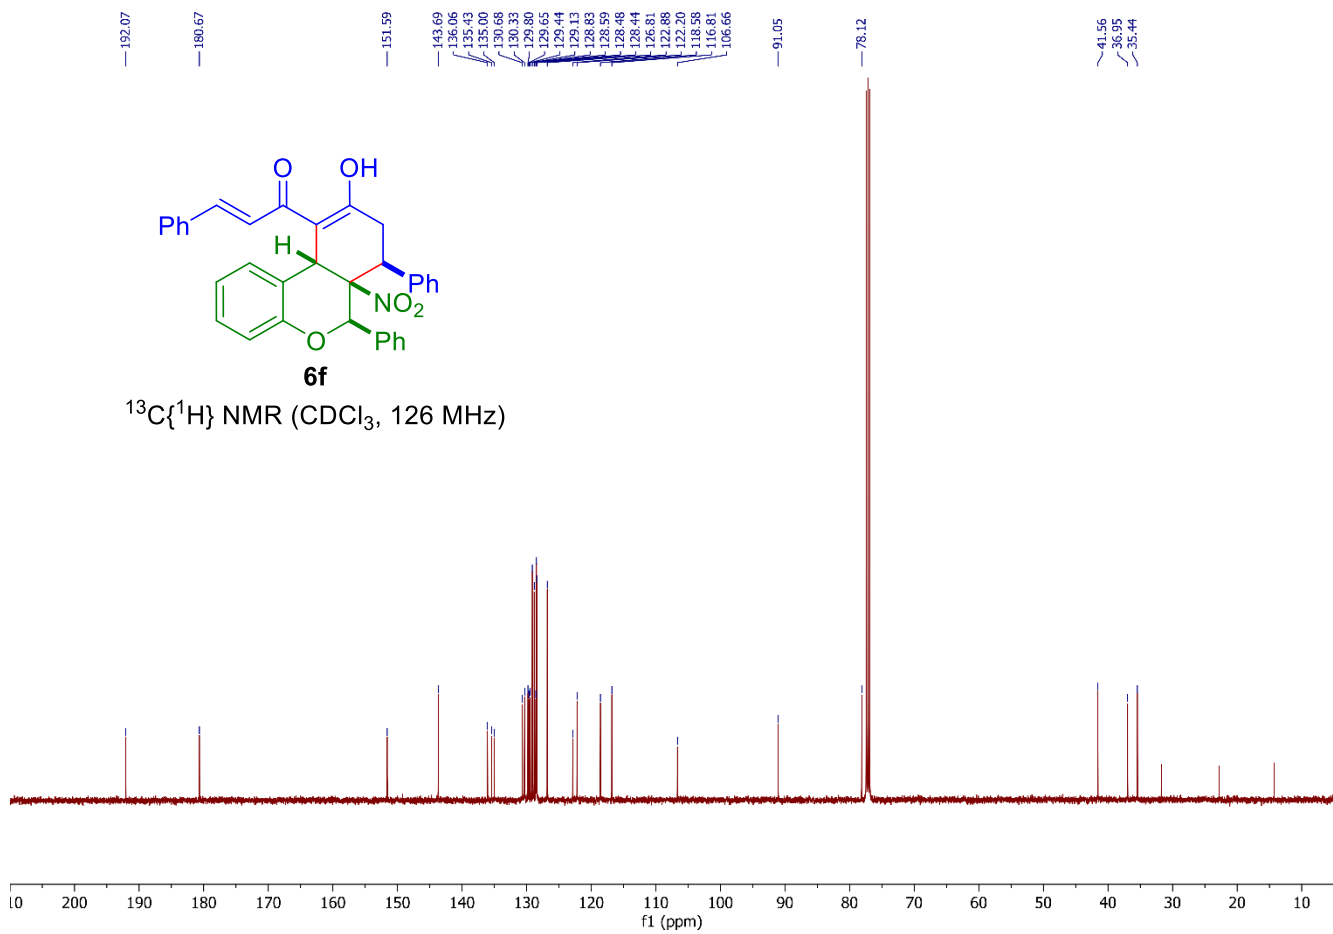

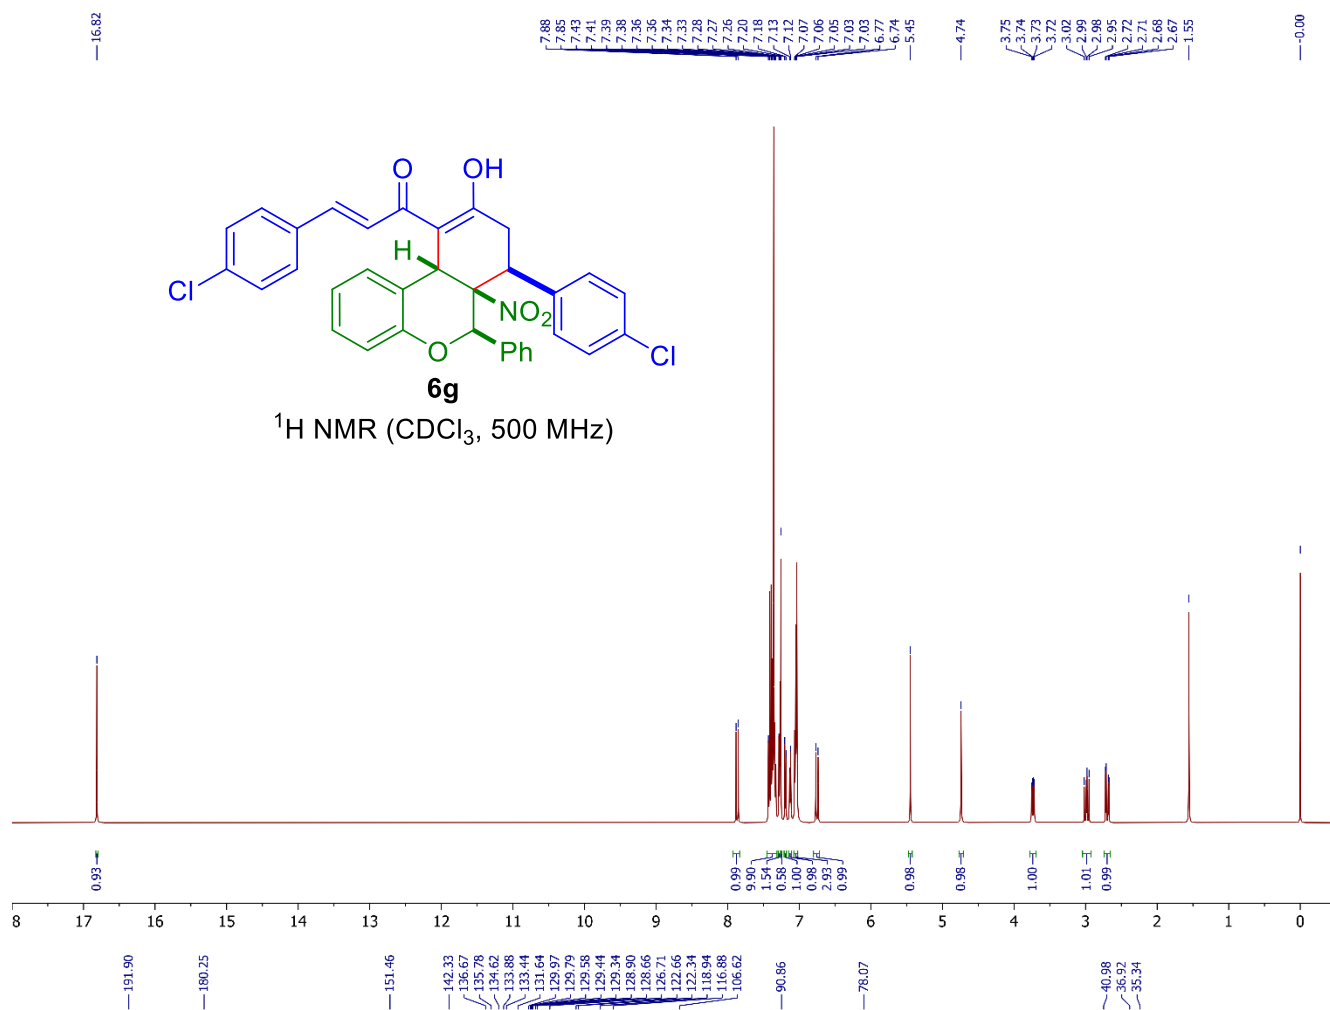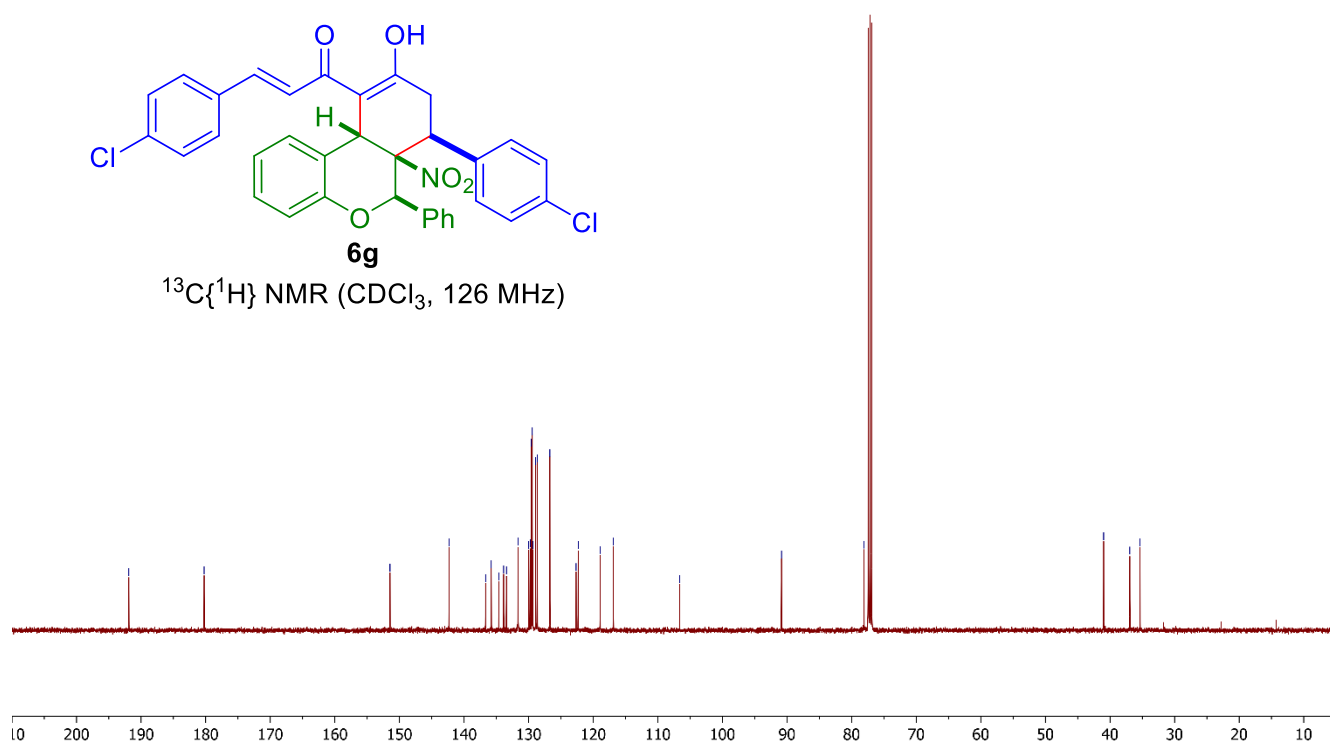

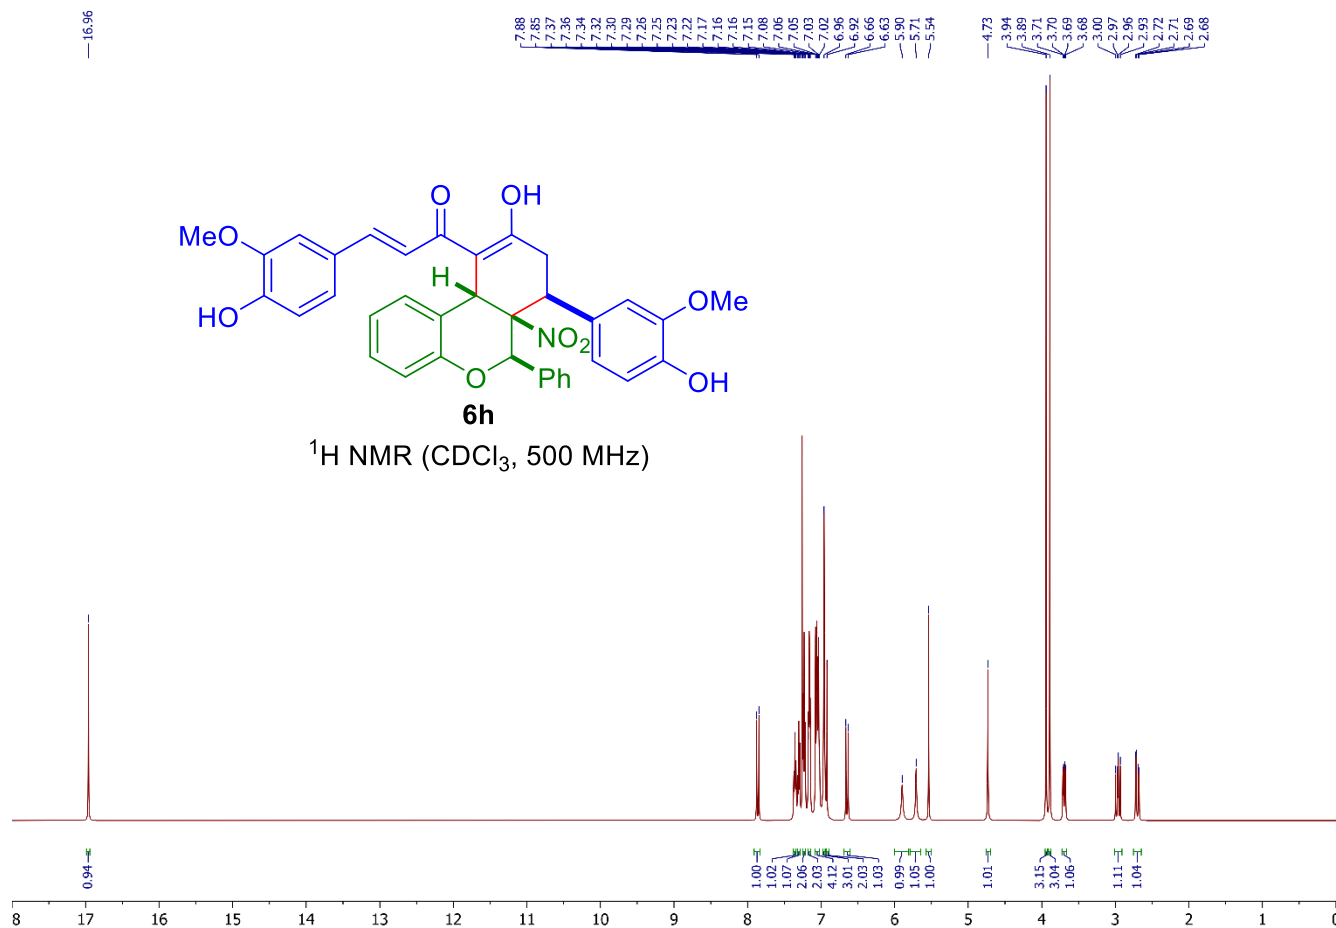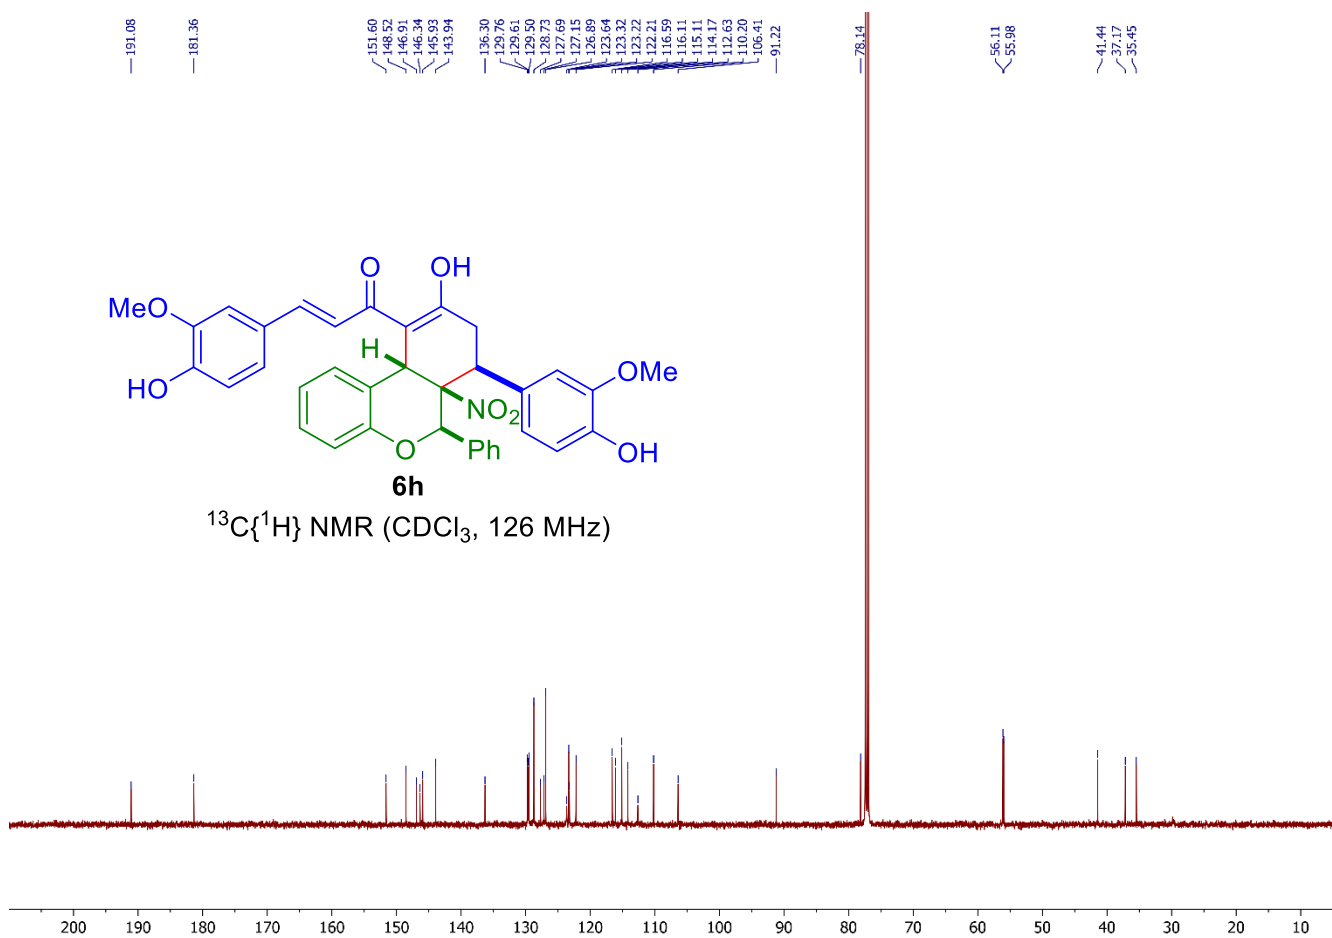

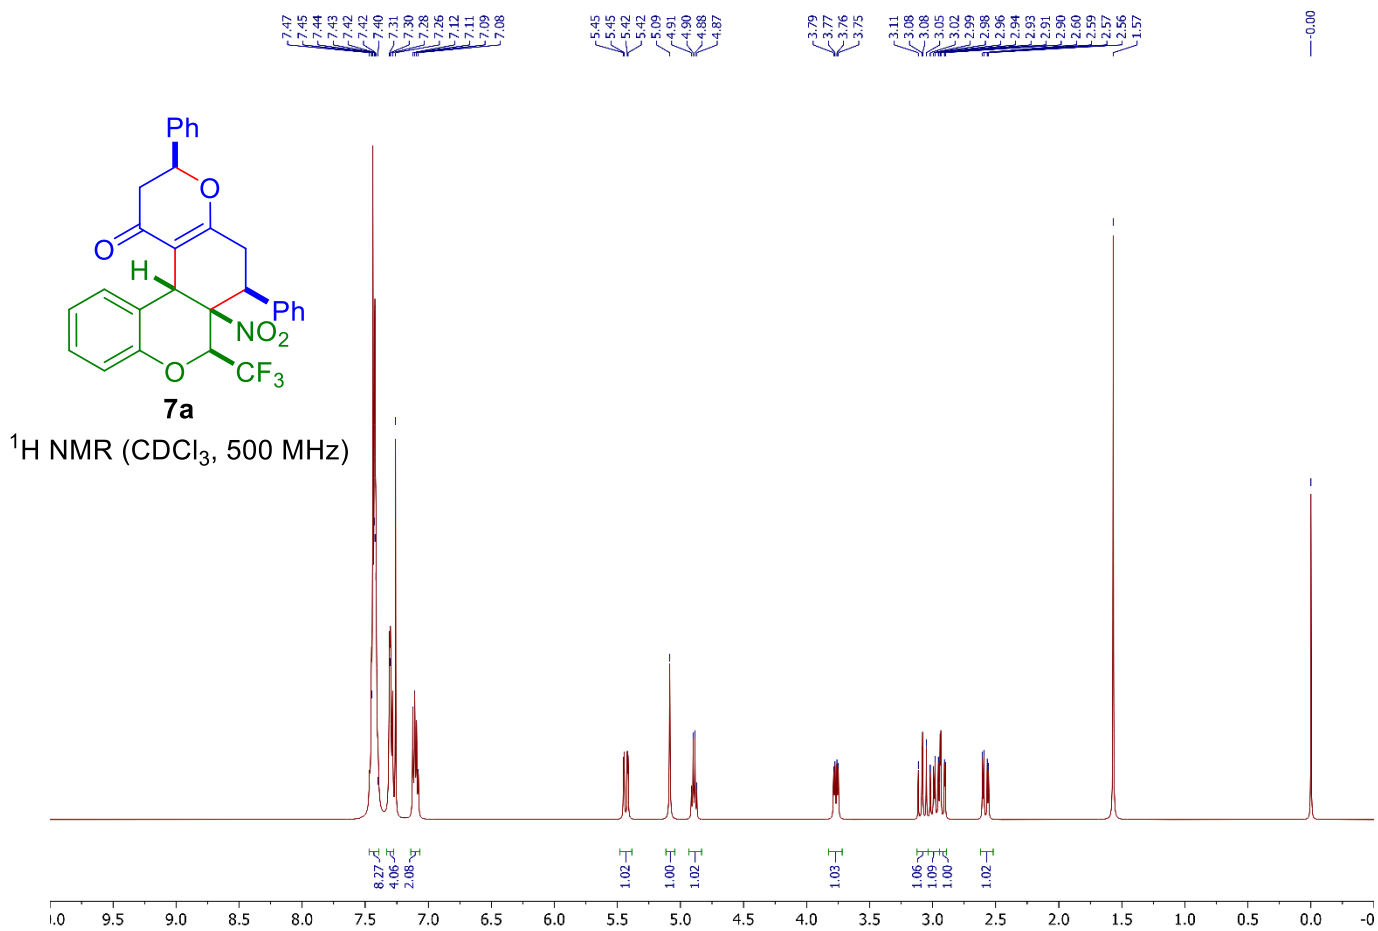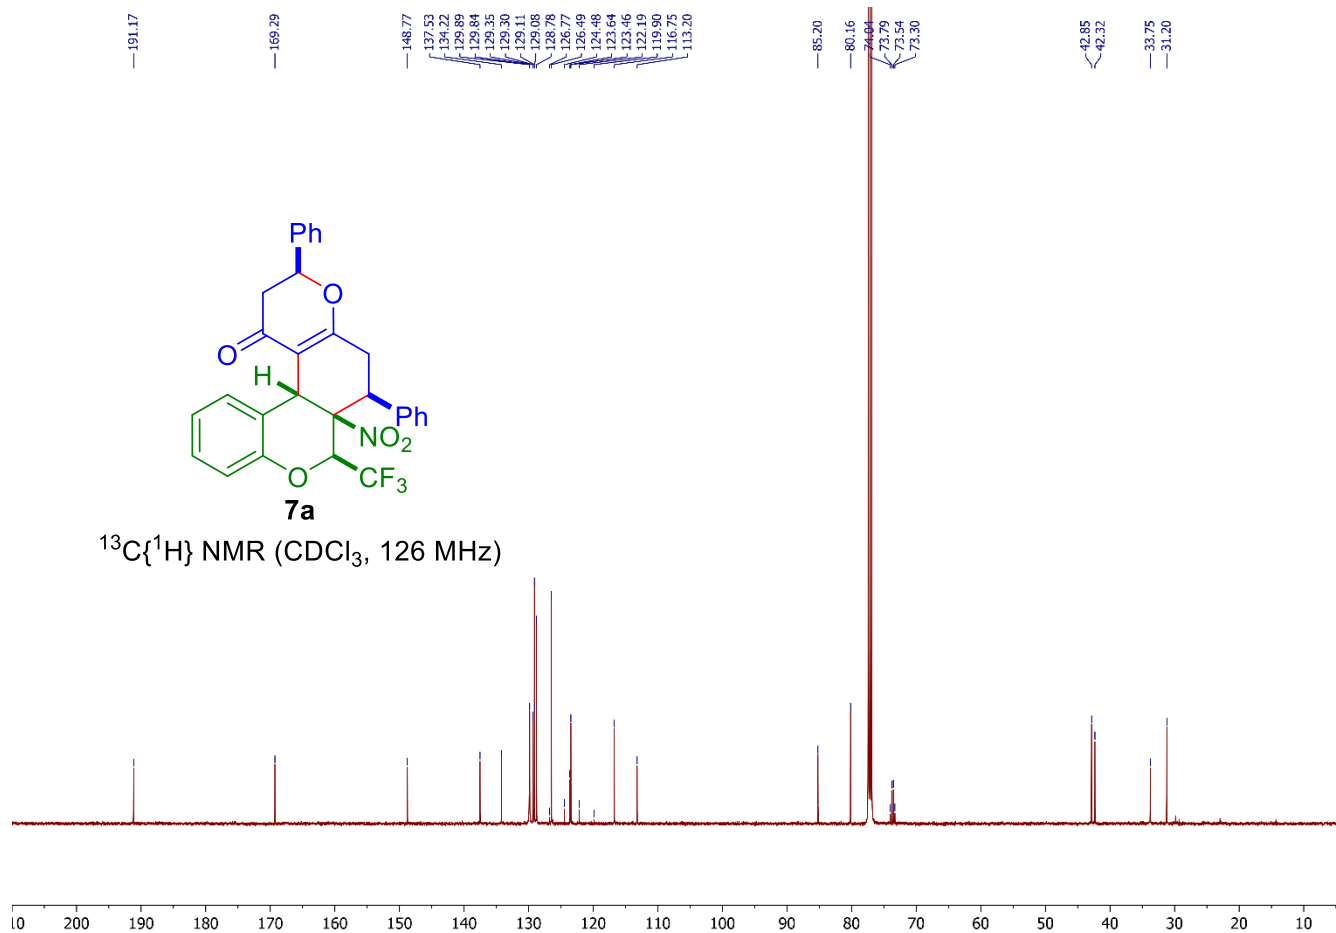

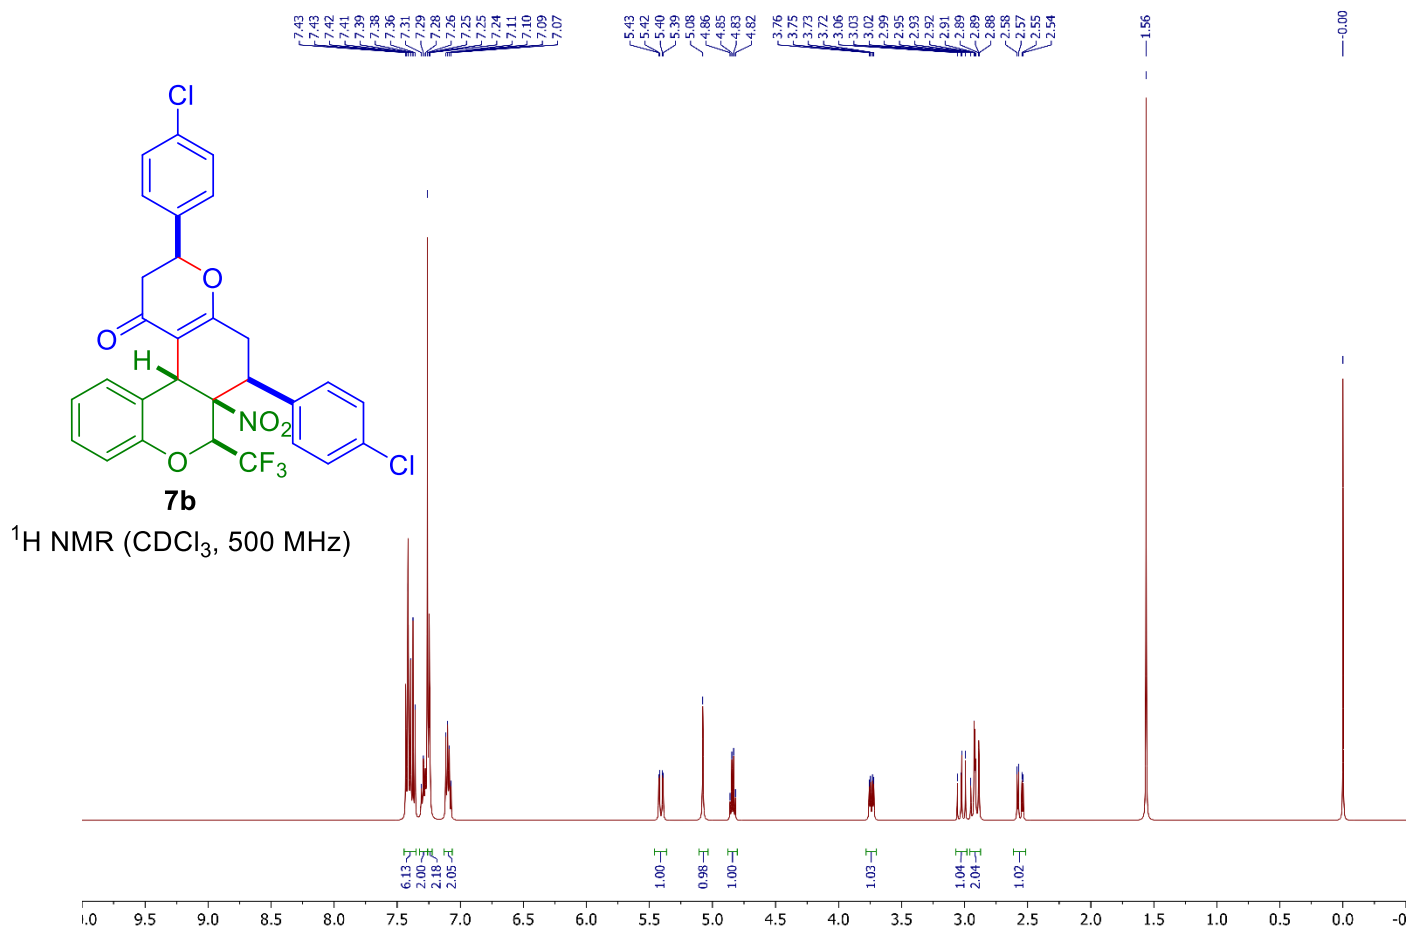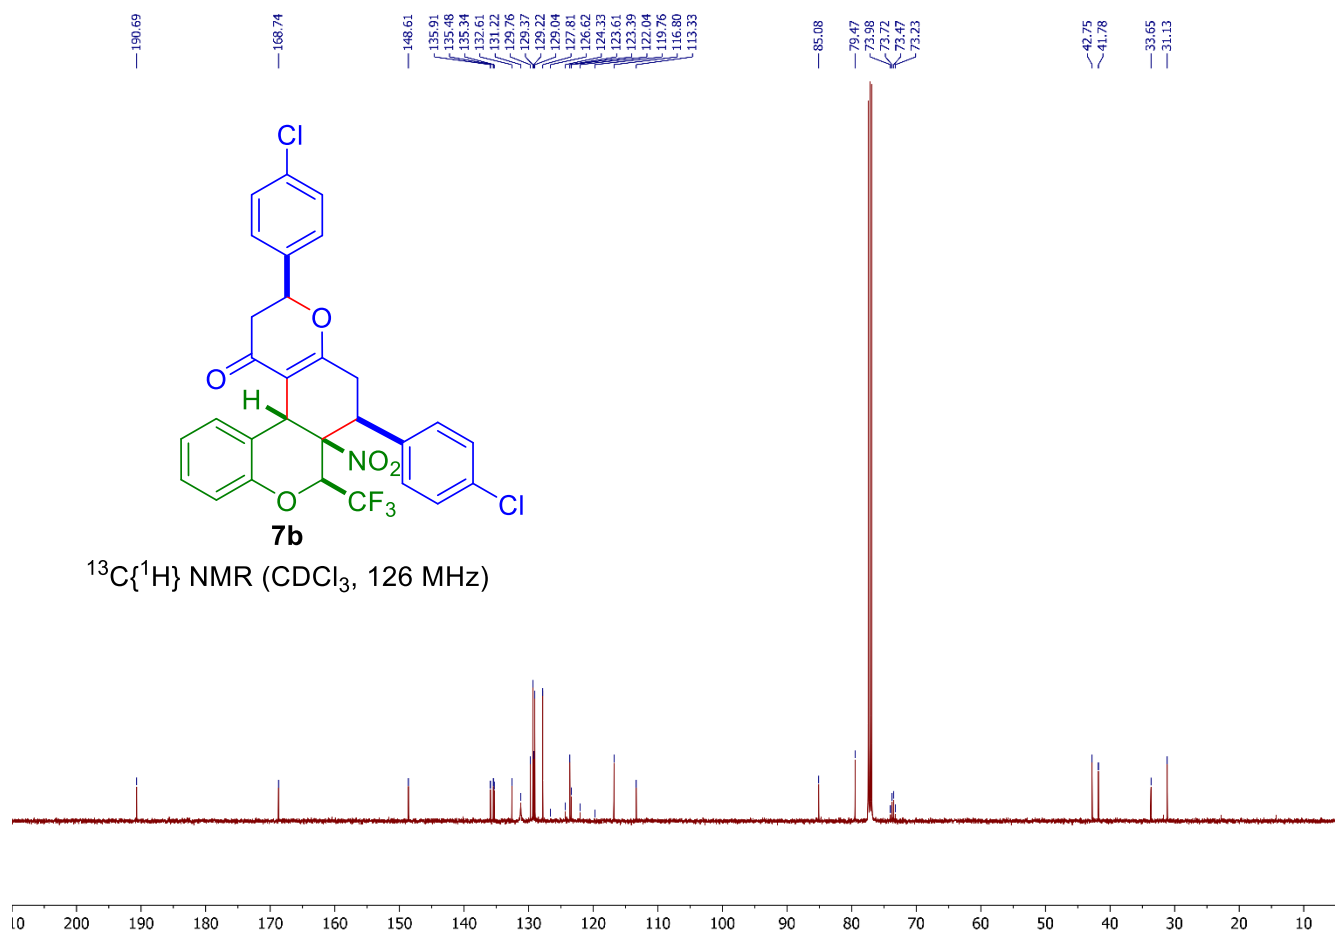

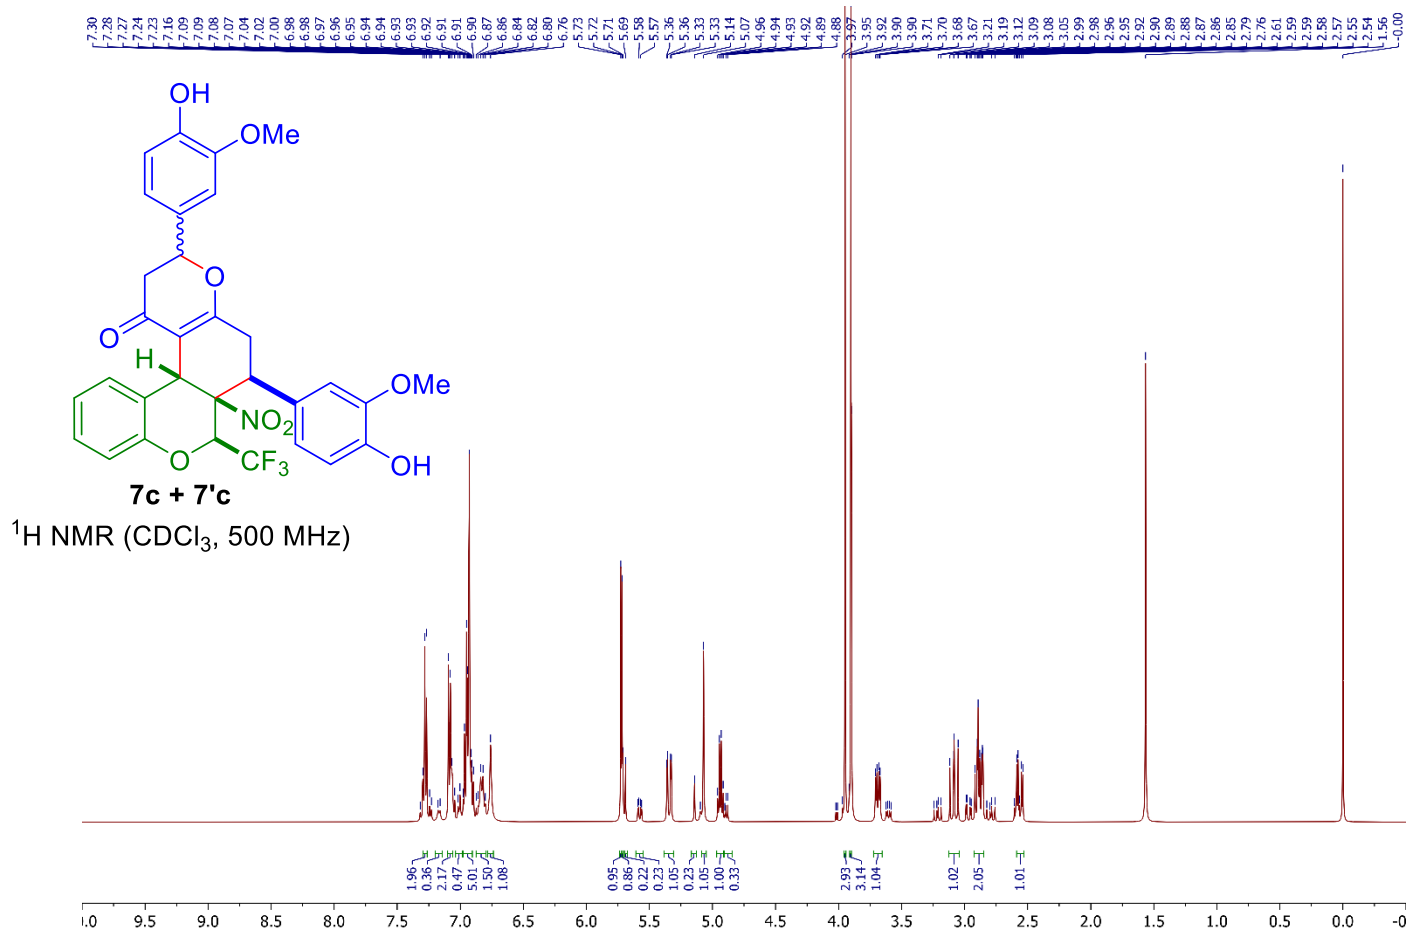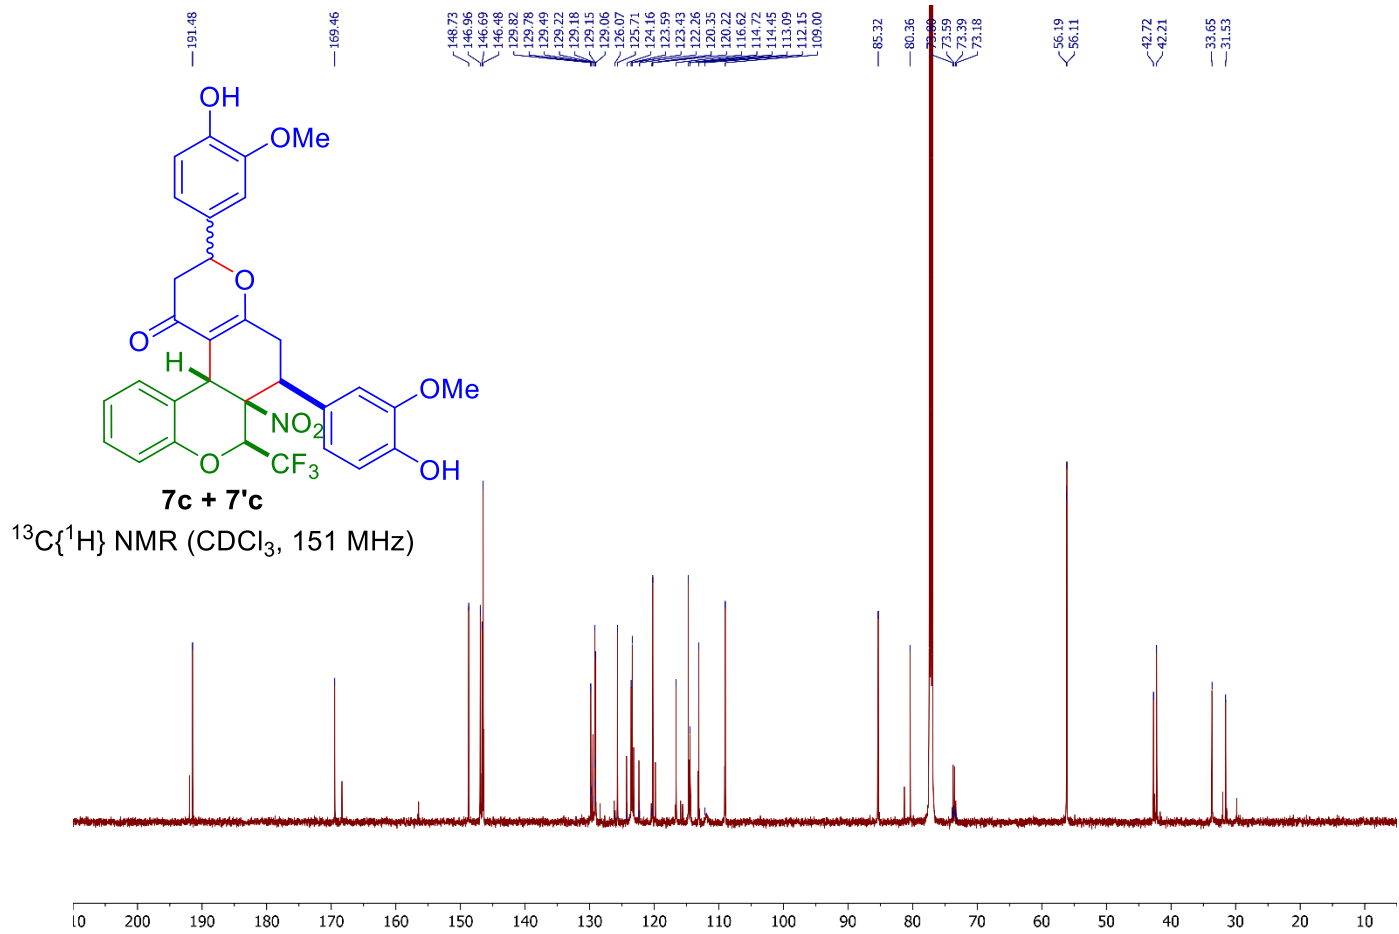

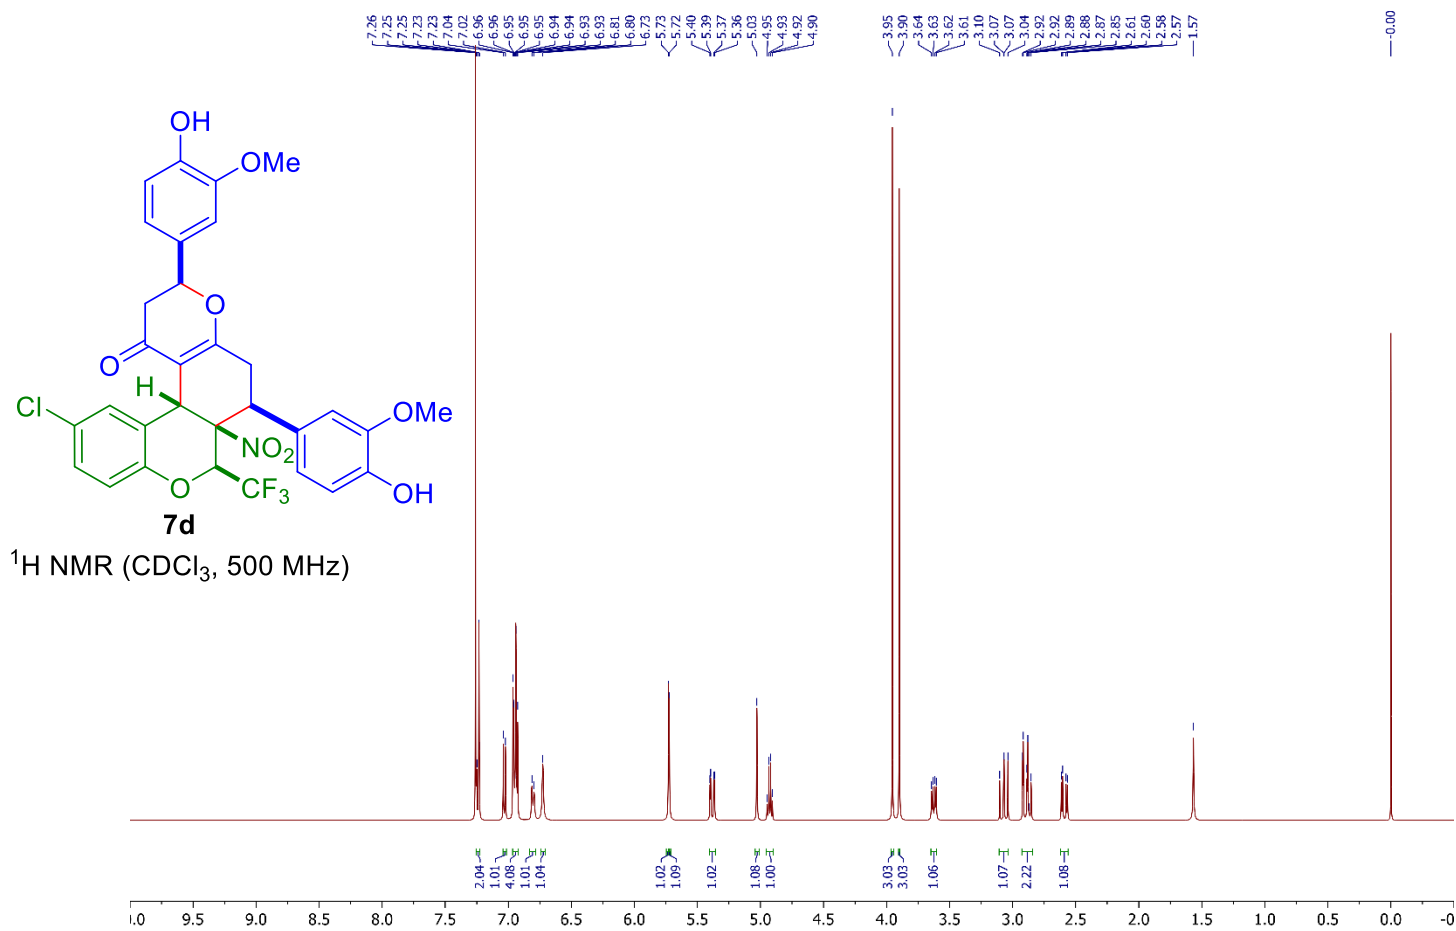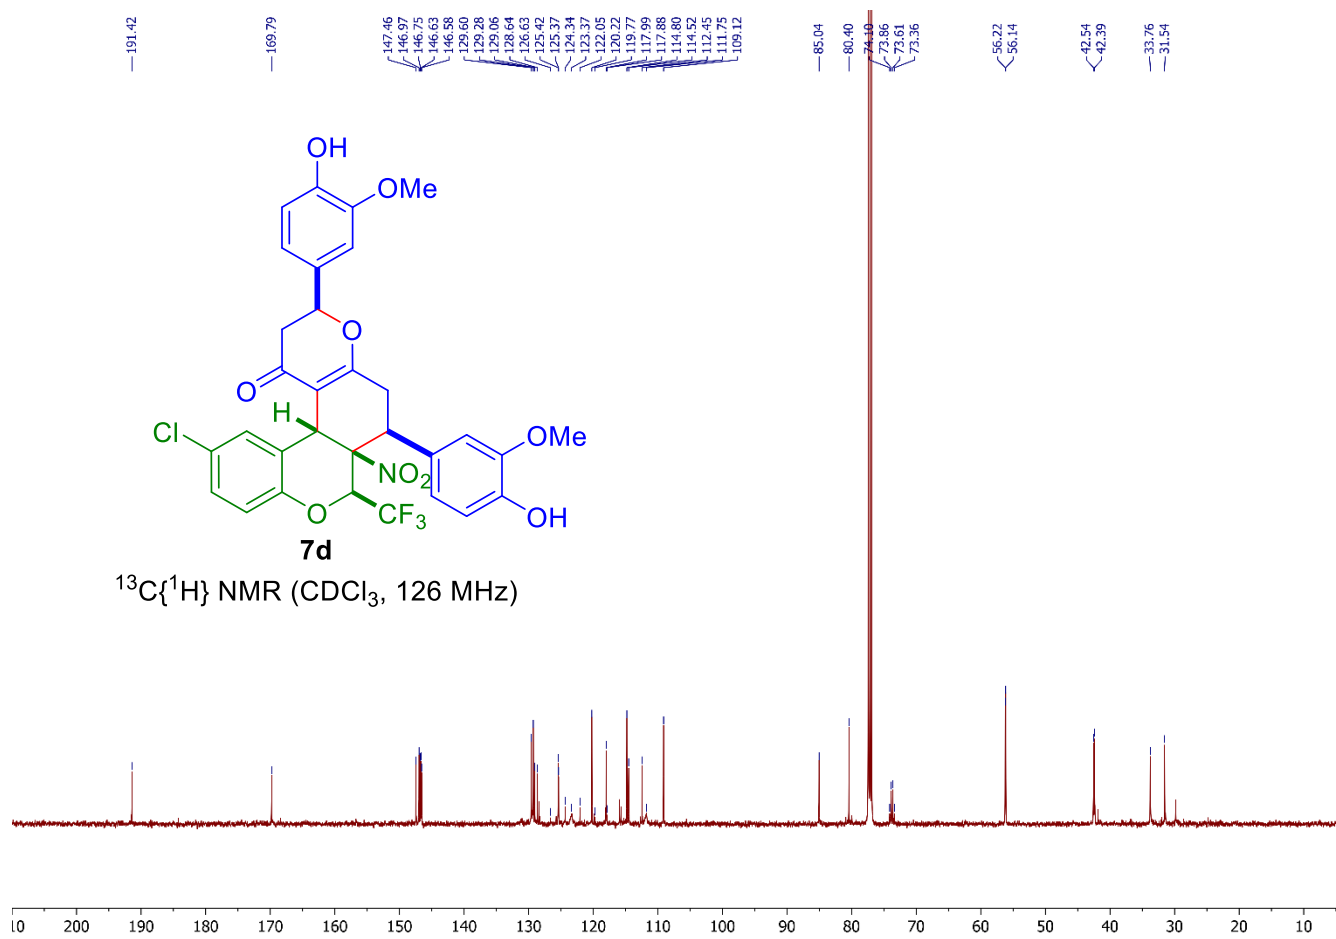



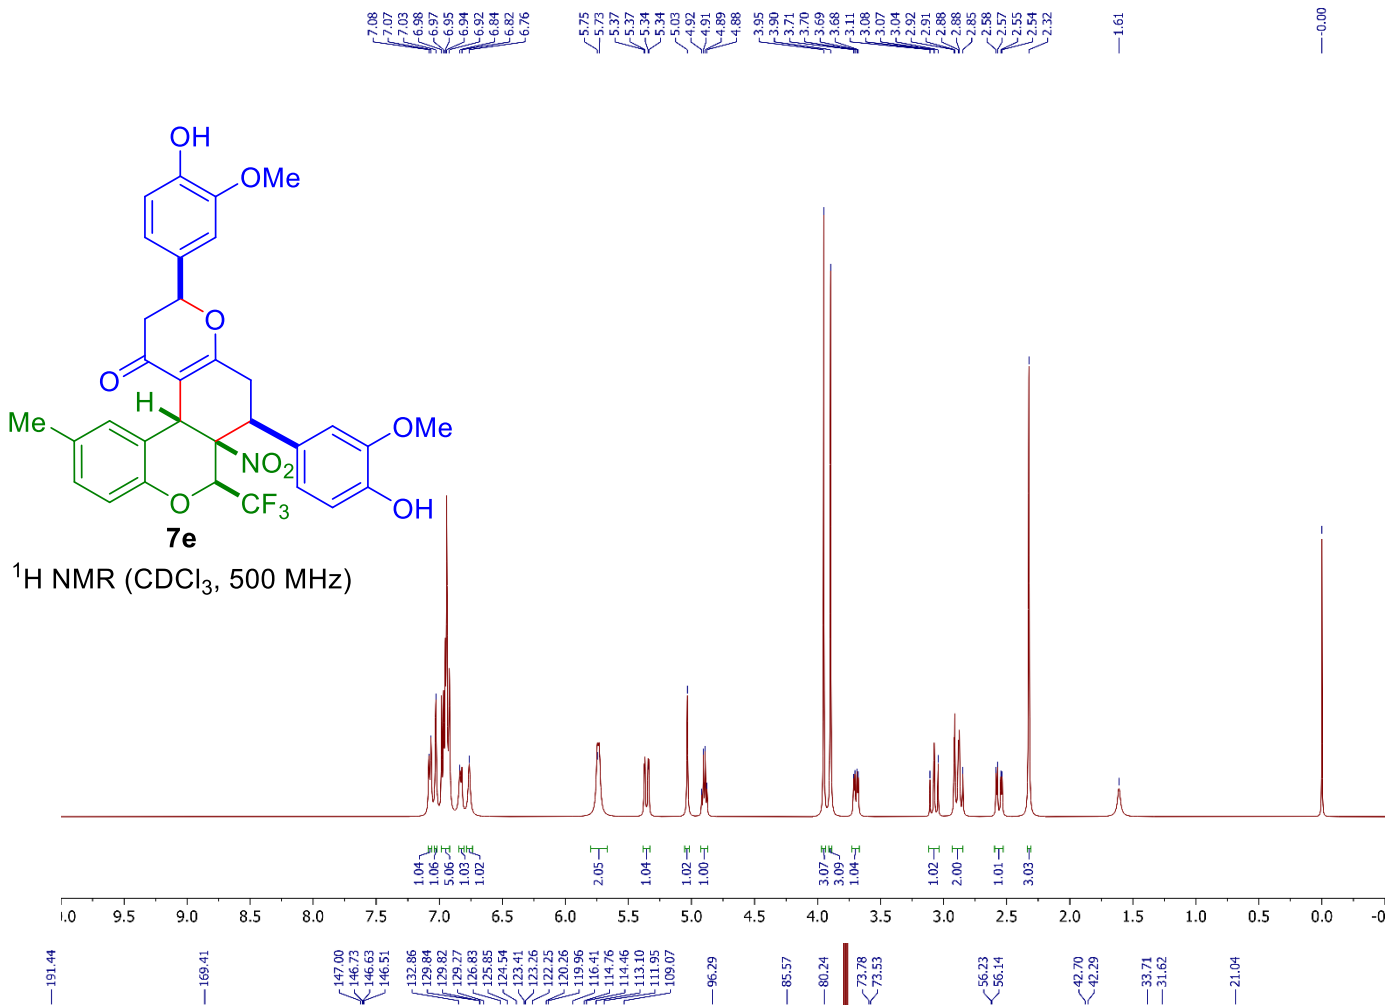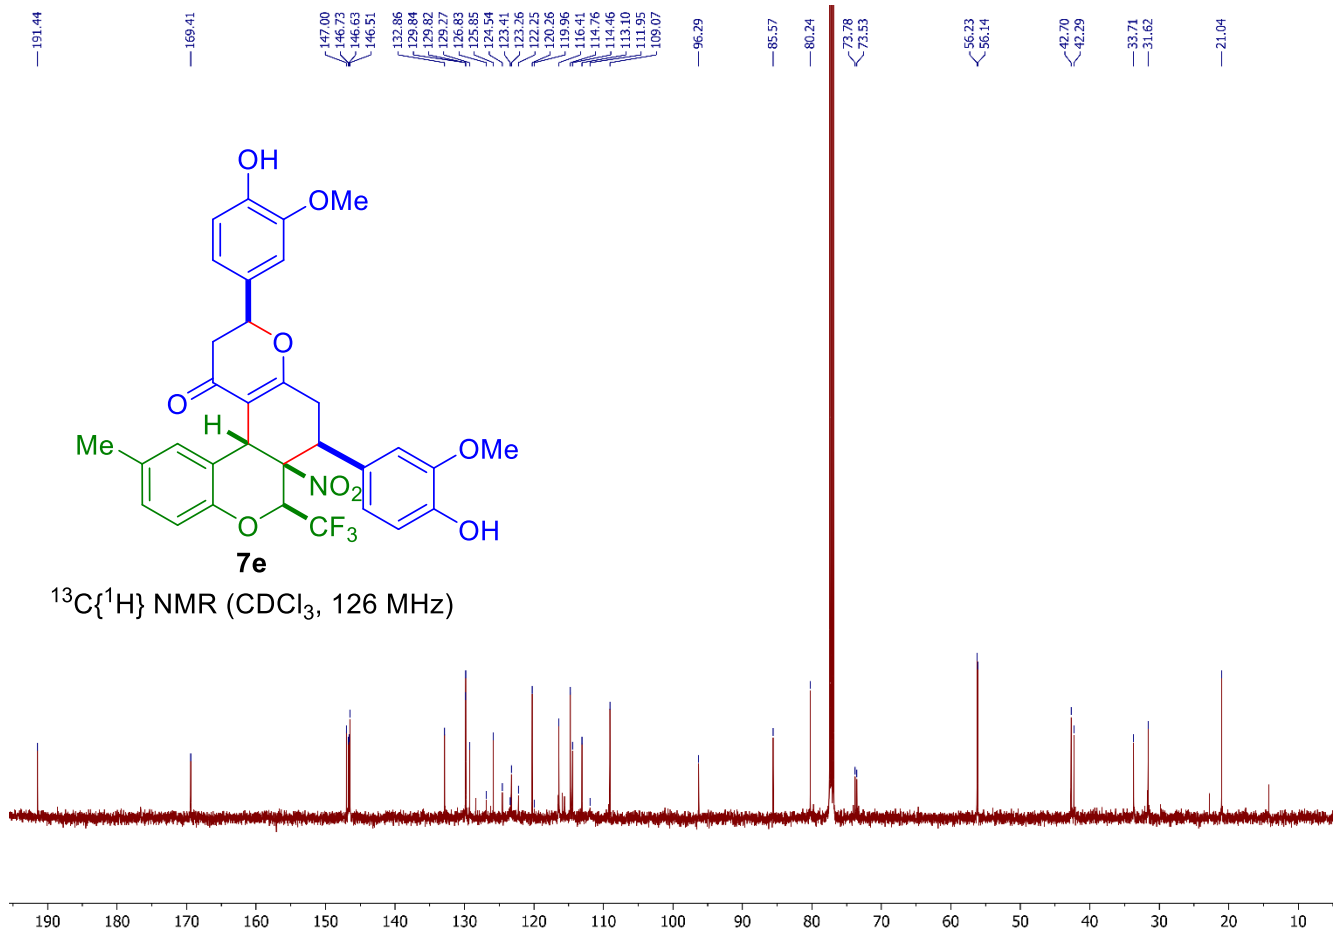

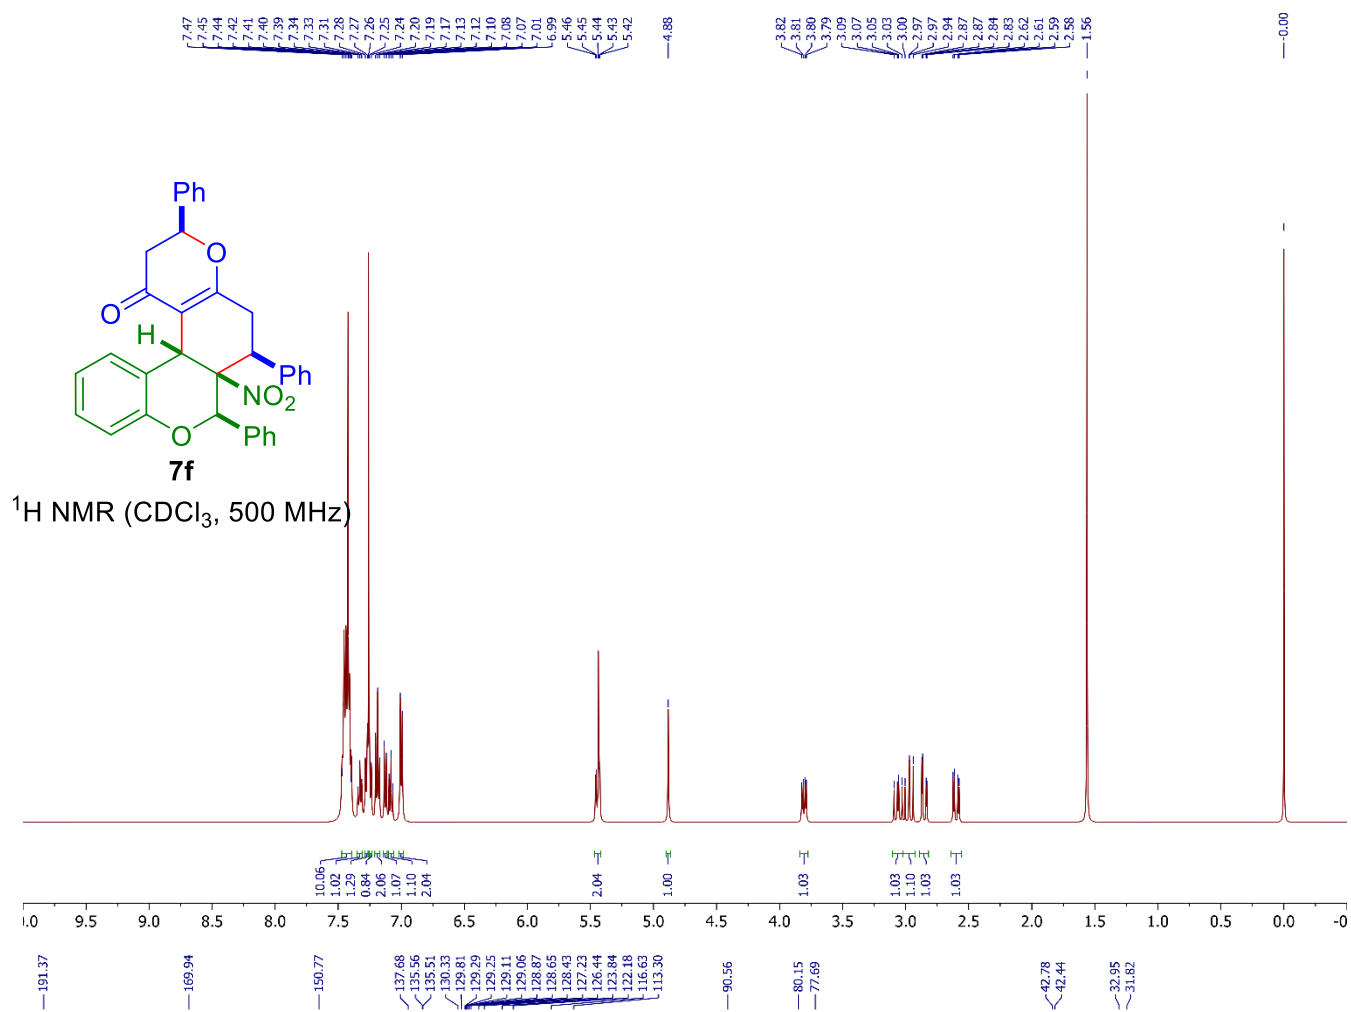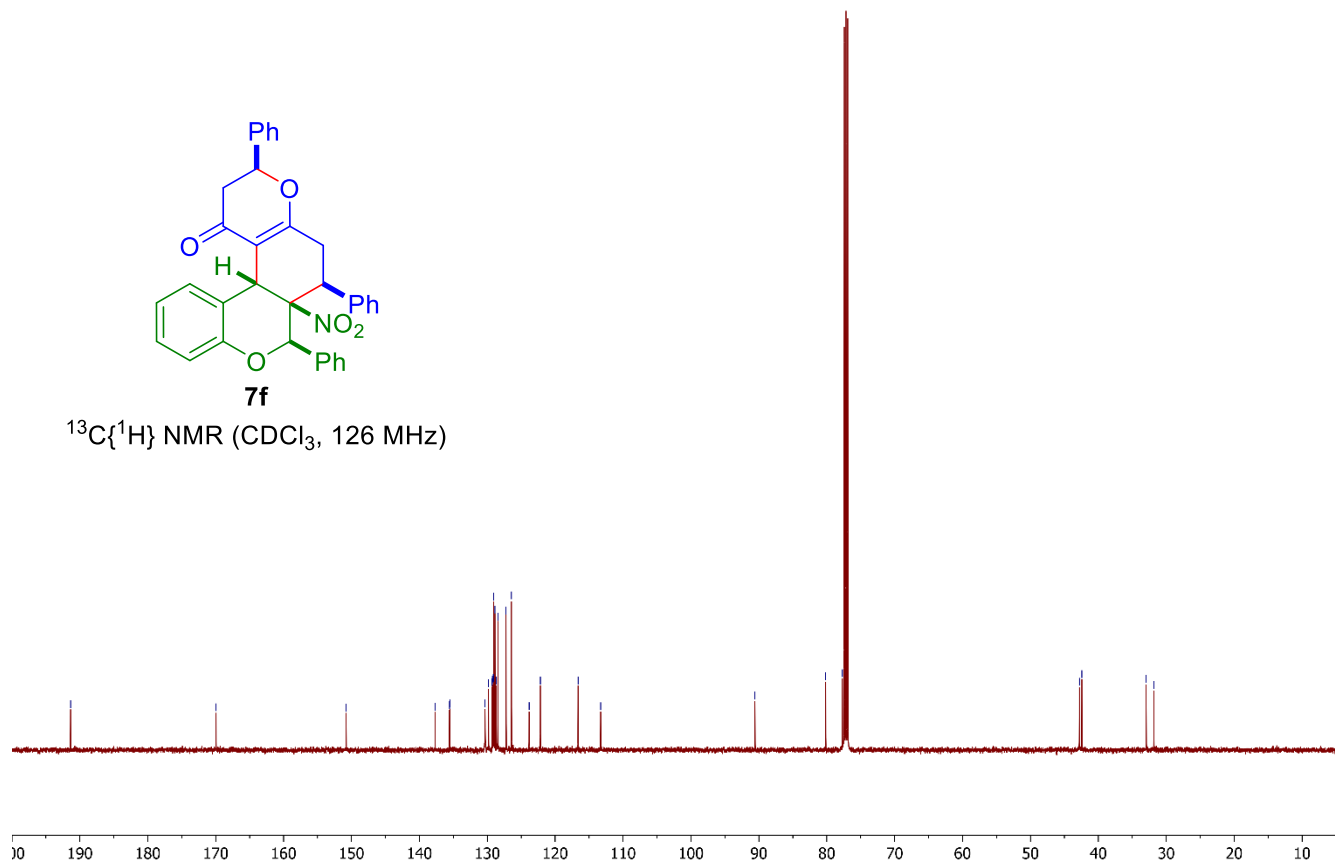

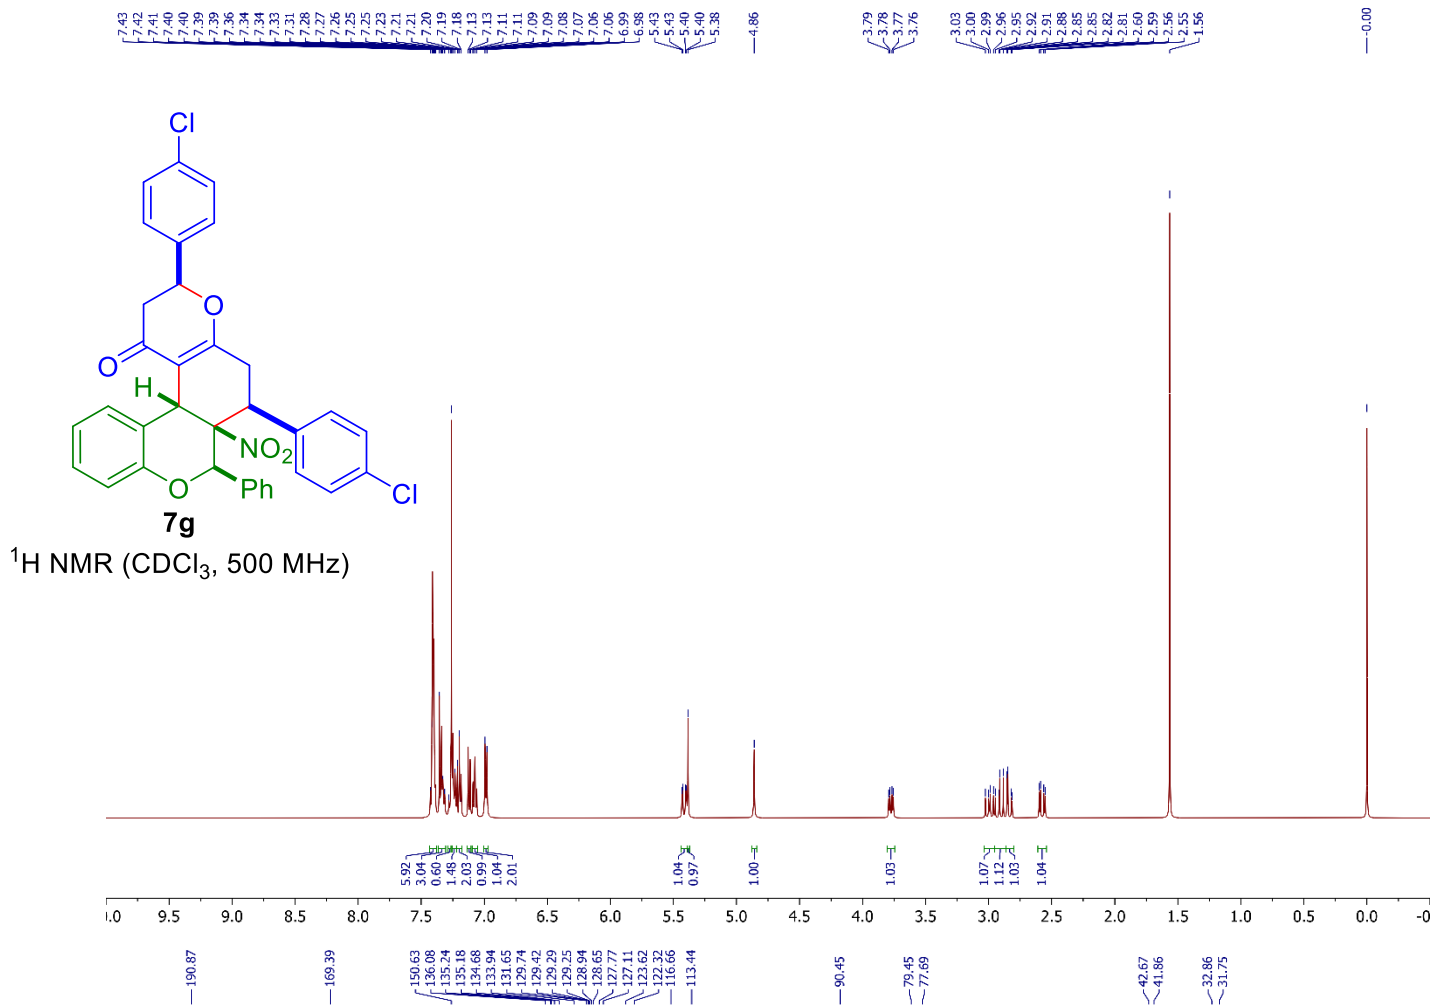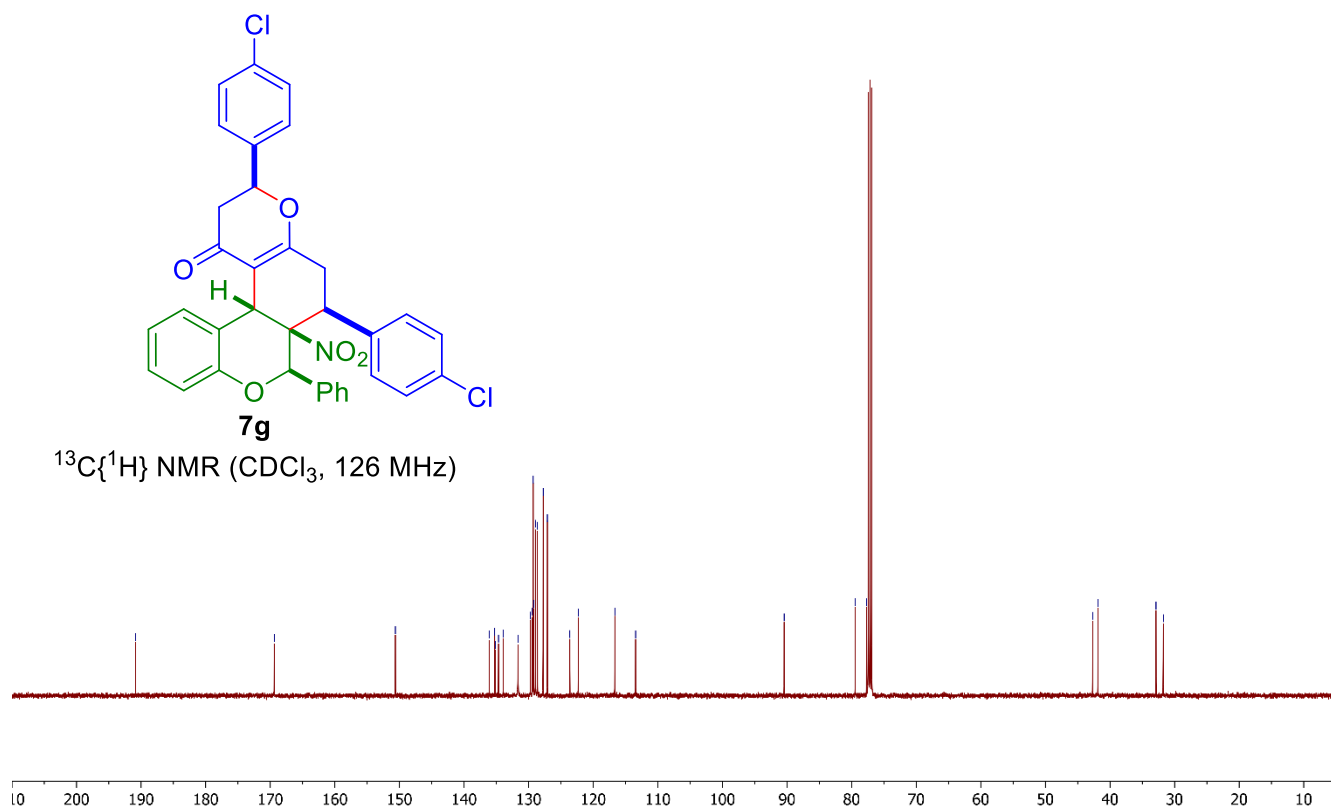

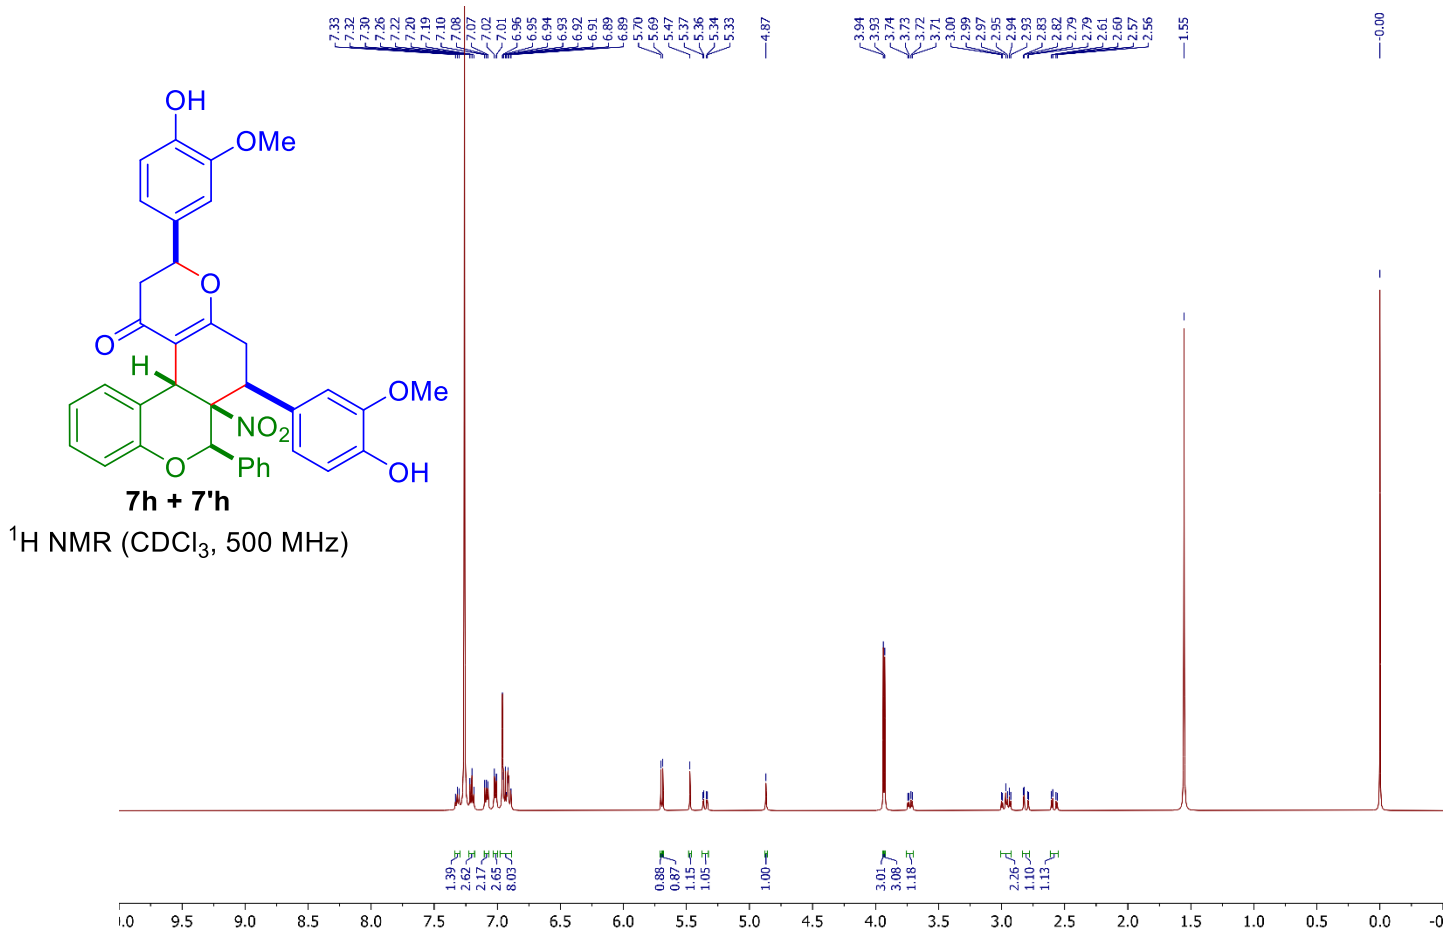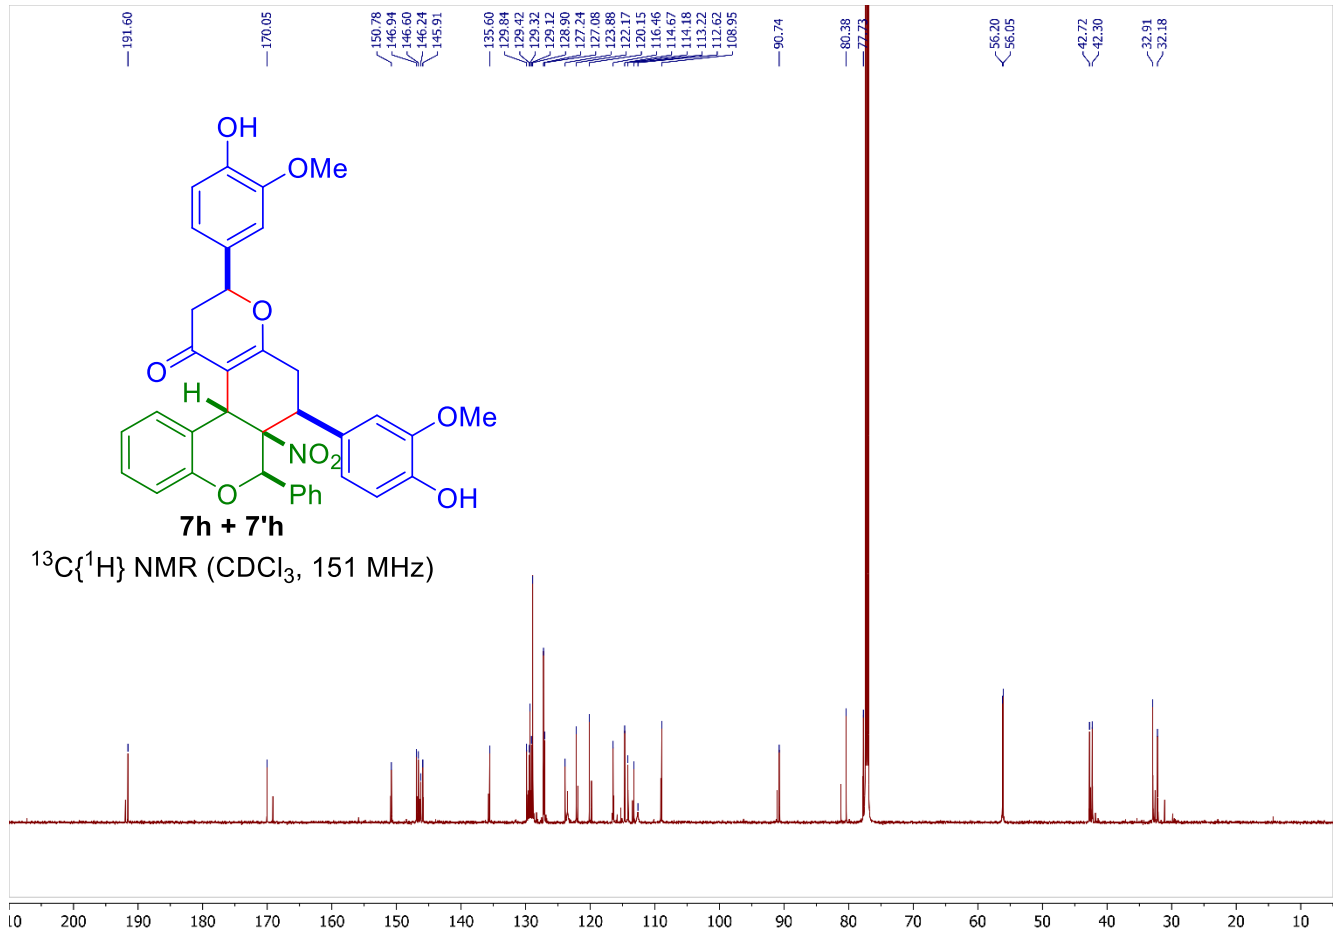

17.73  
17.57

7.79  
7.76  
7.73  
7.60  
7.58  
7.56  
7.53  
7.51  
7.49  
7.46  
7.26  
7.24  
7.23  
7.21  
7.19  
7.18  
7.17  
7.15  
7.14  
7.13  
7.09  
7.08  
7.06  
7.00  
6.99  
6.98  
6.92  
6.89  
6.88  
6.81  
6.80  
6.78  
6.73  
6.70  
6.47  
6.44  
6.26  
6.00

1.56

0.00

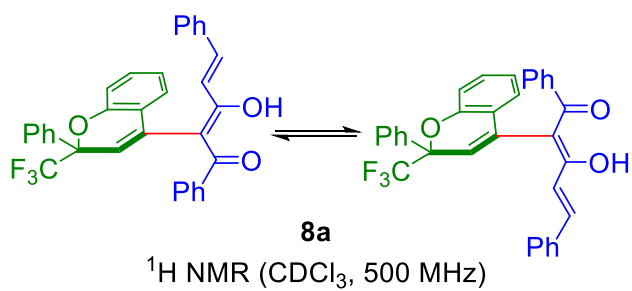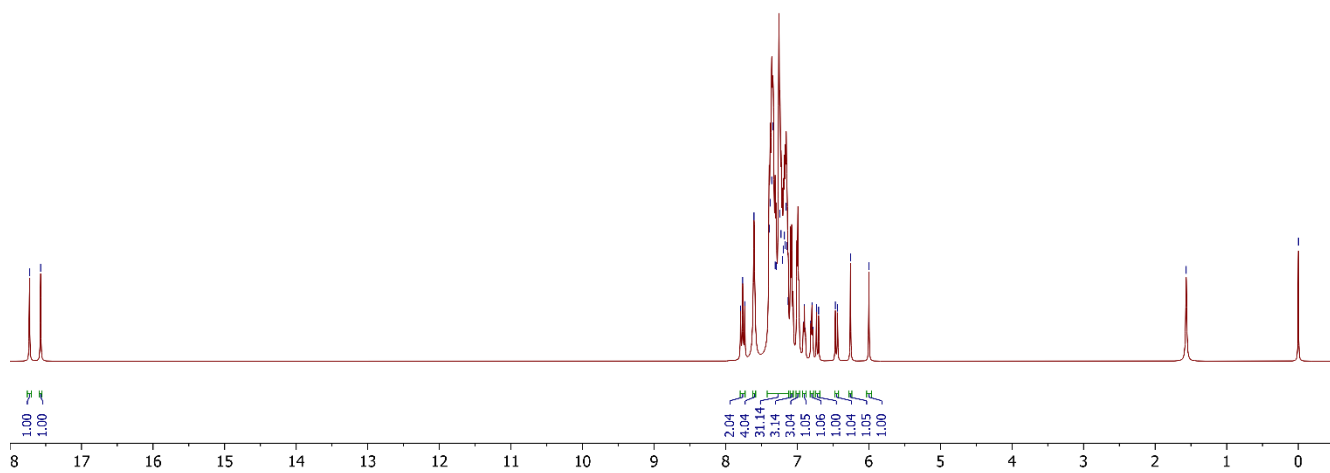

192.18  
190.55  
182.46  
180.45  
151.28  
151.13  
142.54  
142.12  
137.38  
136.96  
136.76  
135.66  
135.07  
134.89  
133.66  
133.44  
131.27  
131.06  
131.00  
130.95  
130.49  
130.36  
129.19  
129.08  
129.04  
128.93  
128.90  
128.86  
128.56  
128.49  
128.44  
128.32  
128.03  
127.96  
127.80  
126.86  
126.70  
126.59  
126.36  
126.04  
124.82  
124.70  
123.21  
122.93  
122.80  
122.61  
122.36  
122.19  
121.17  
121.05  
120.70  
116.95  
116.94  
108.86  
108.73  
80.92  
80.80  
80.72  
80.60  
80.52  
80.40  
80.32  
80.20

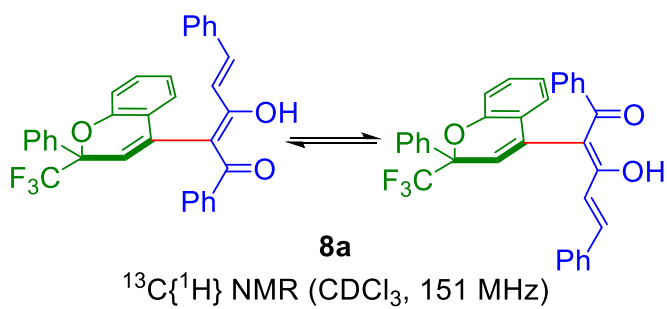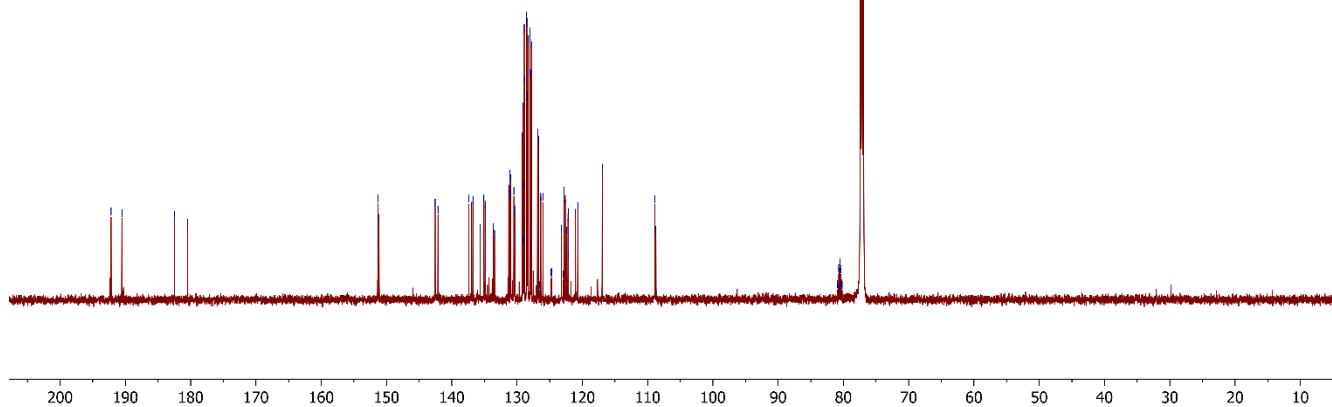

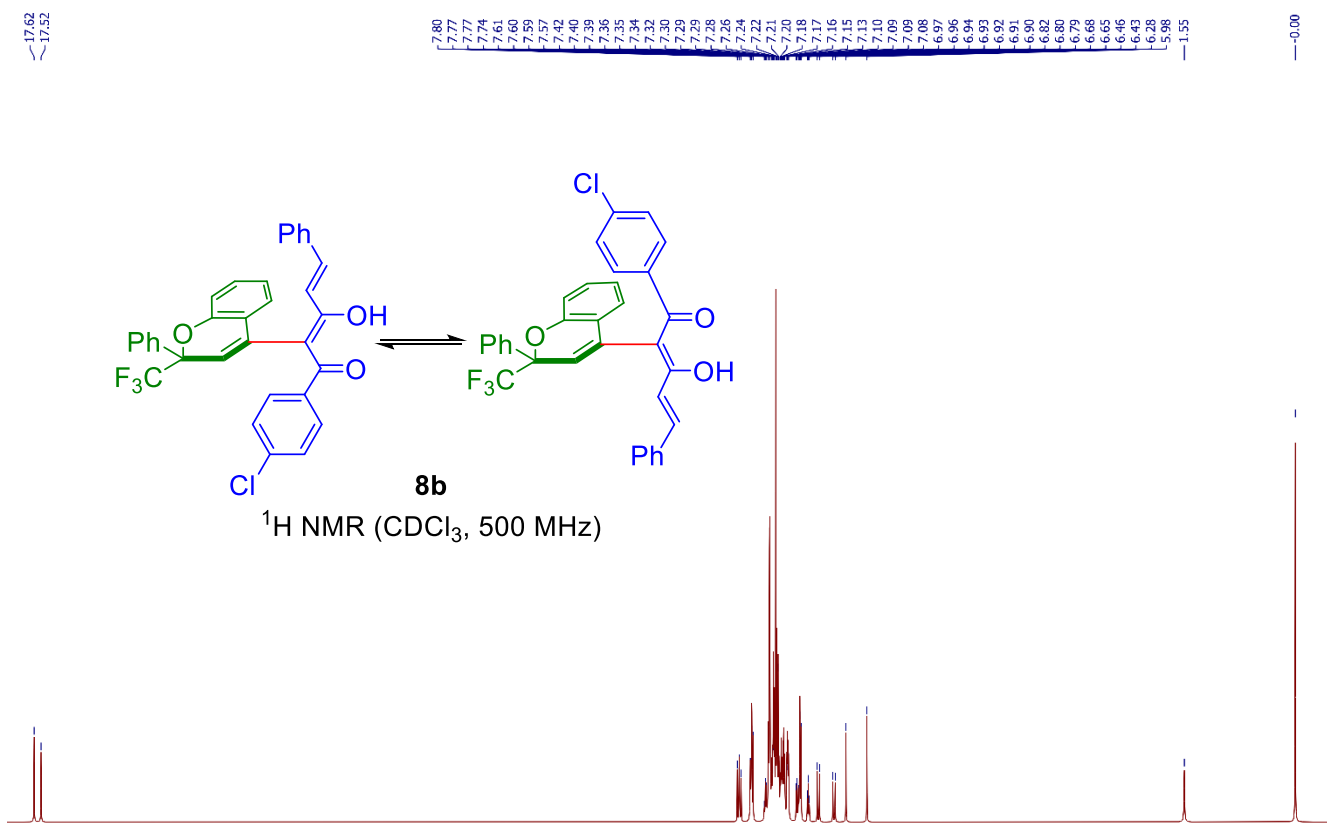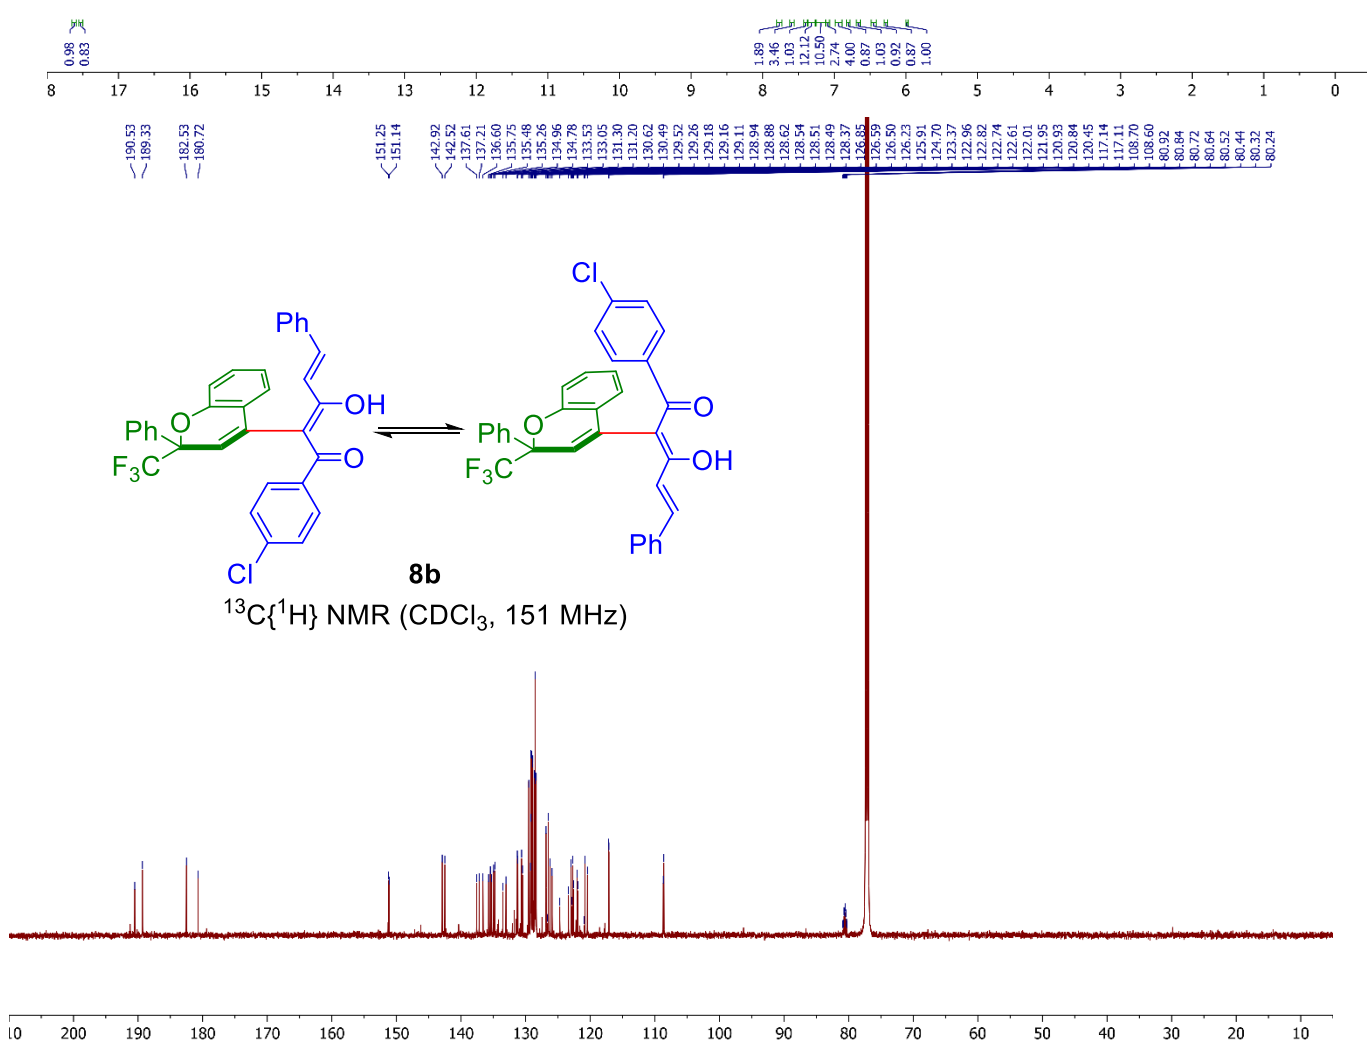

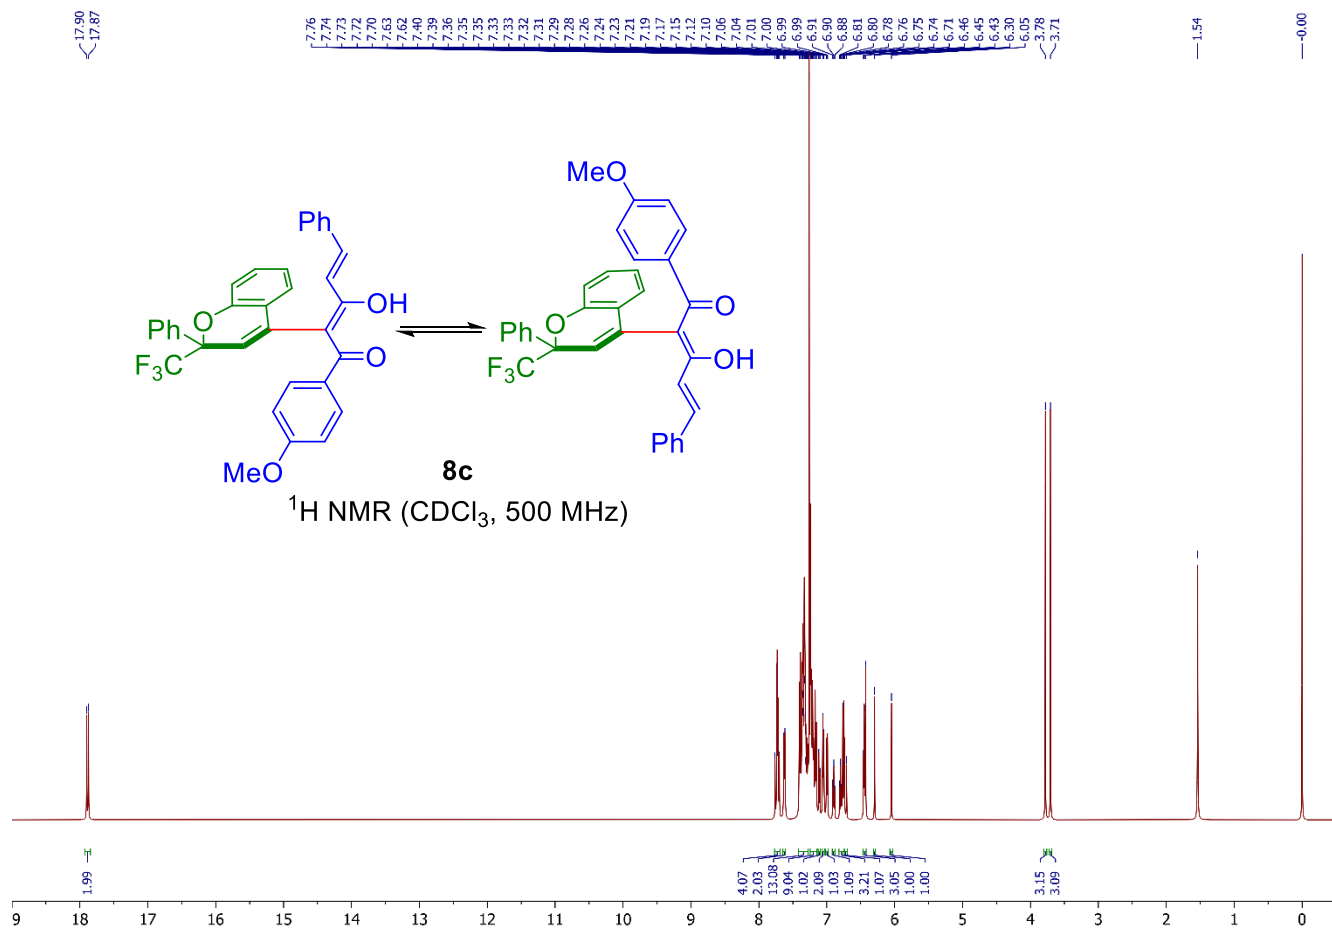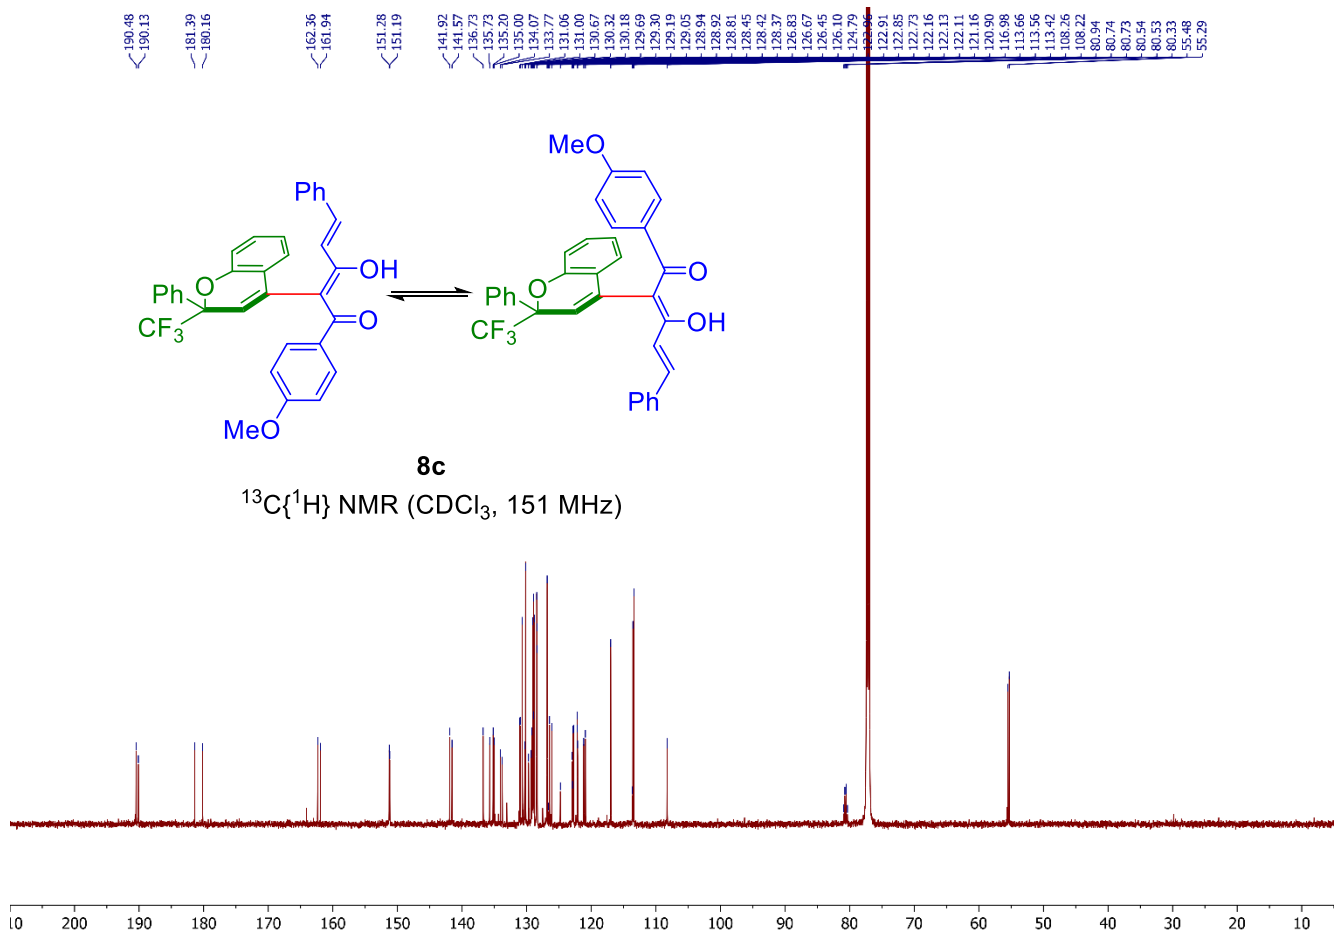

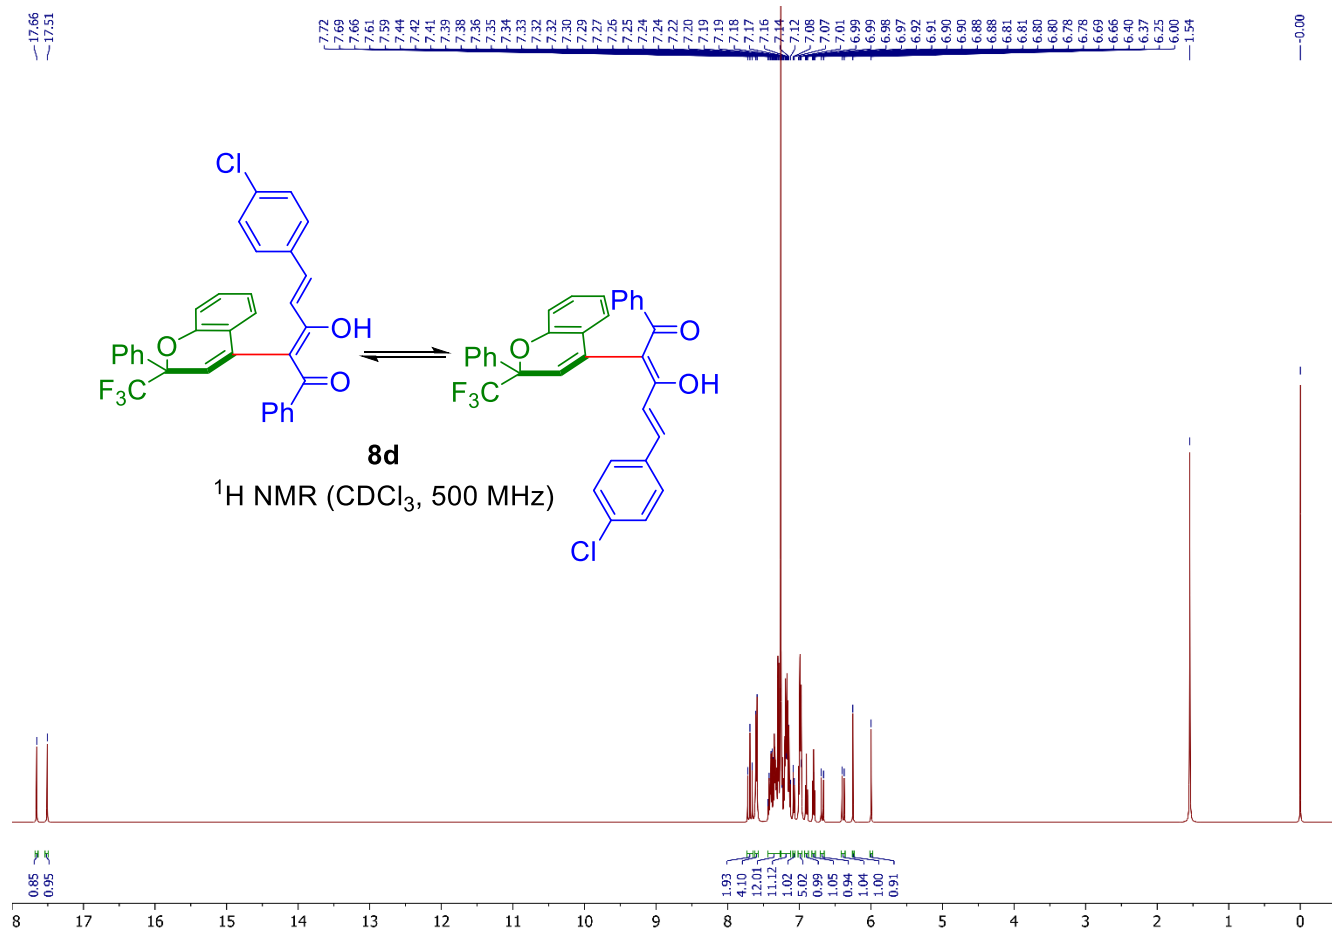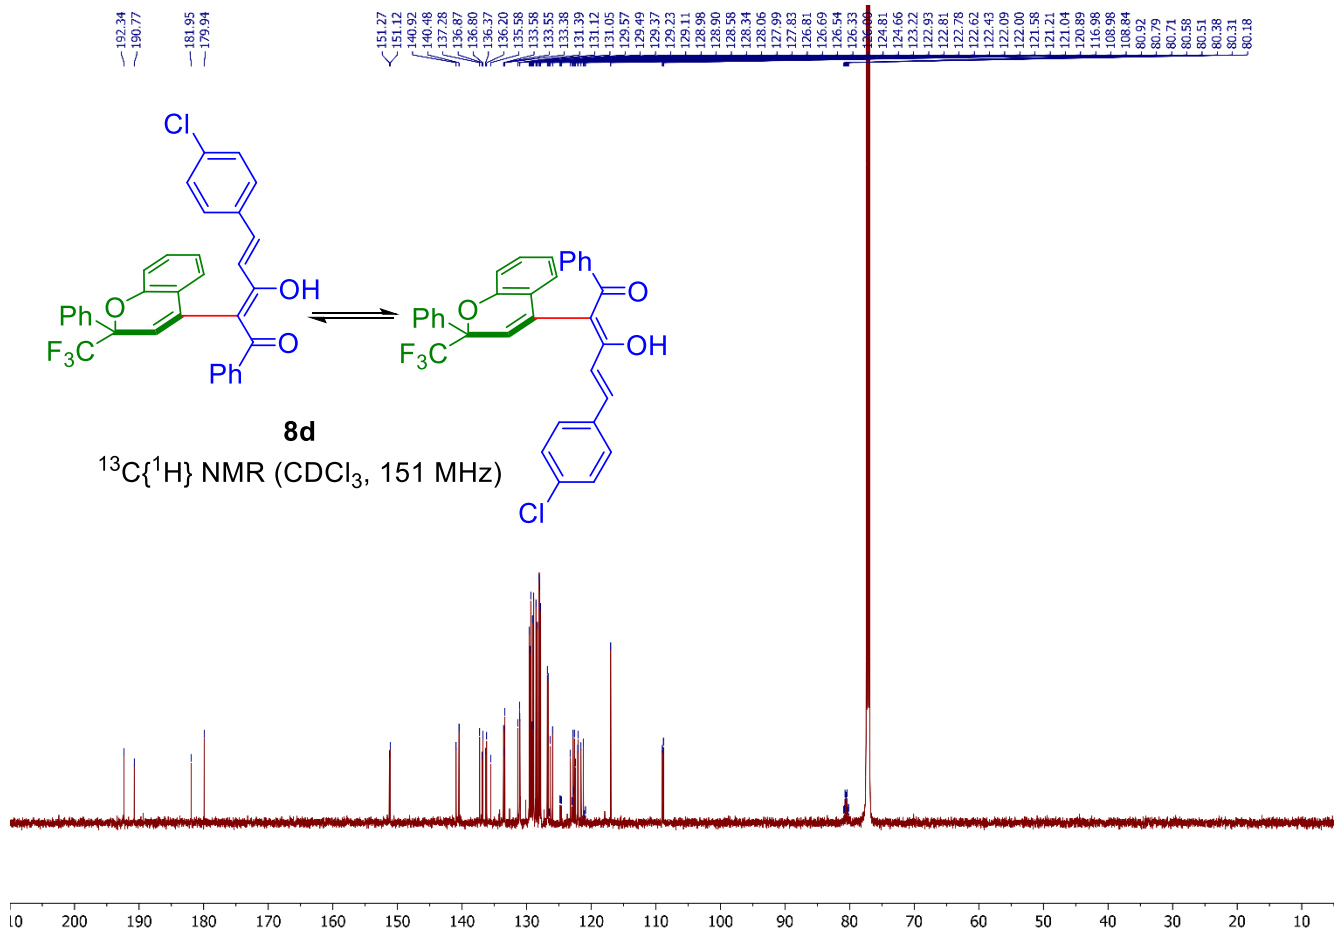



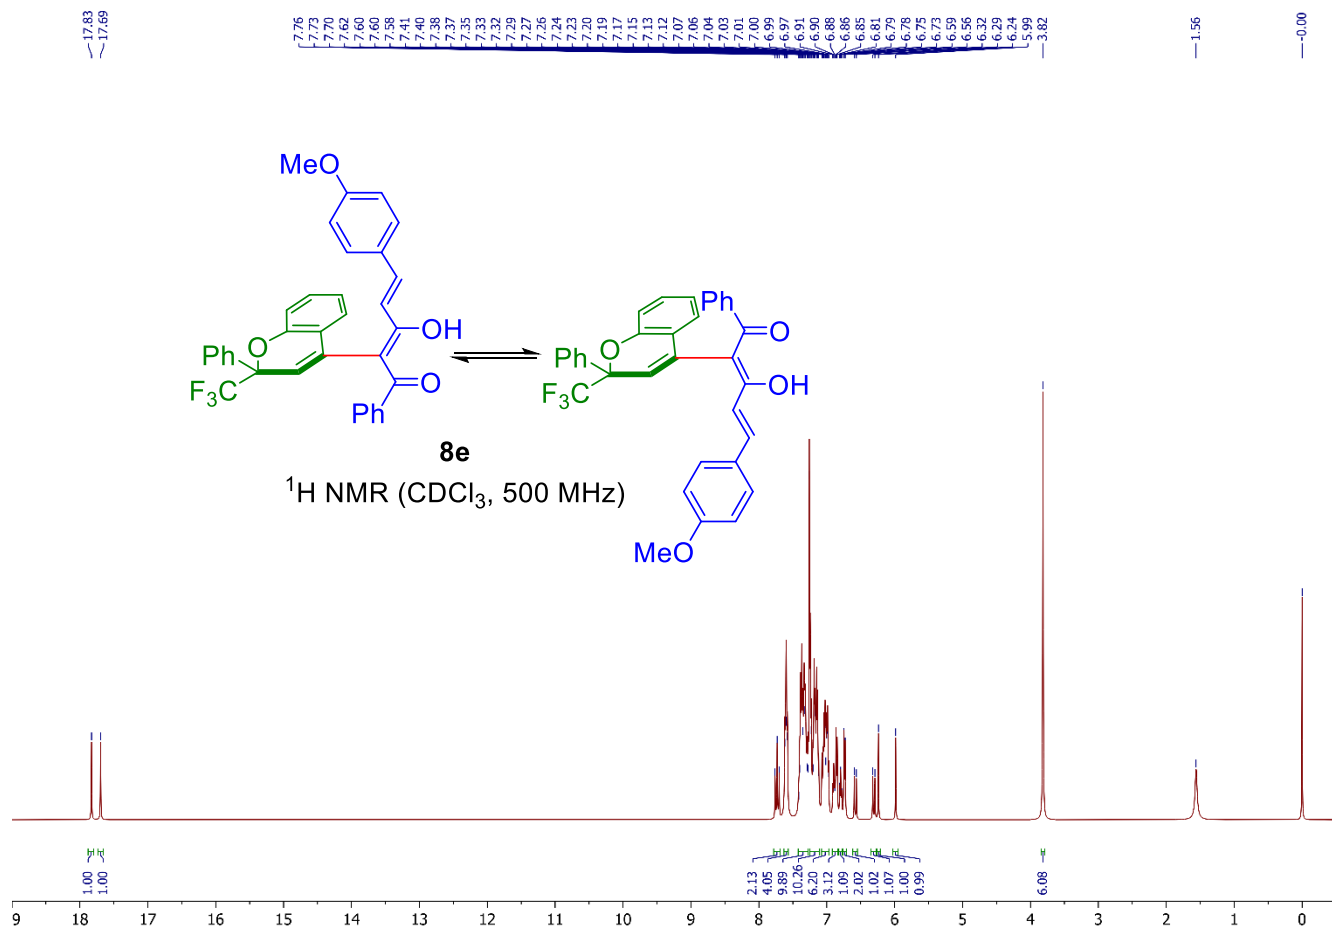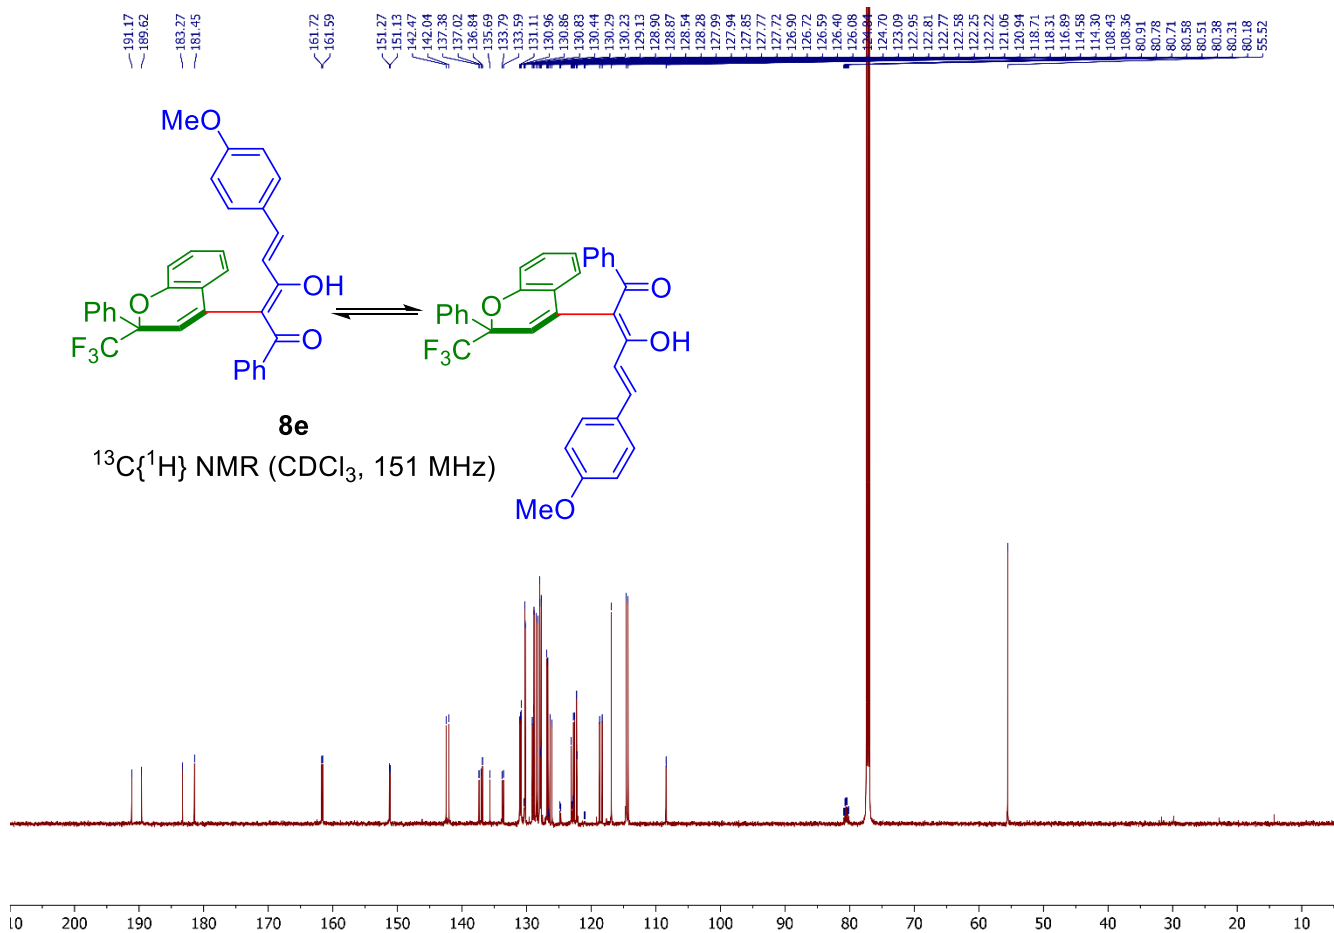

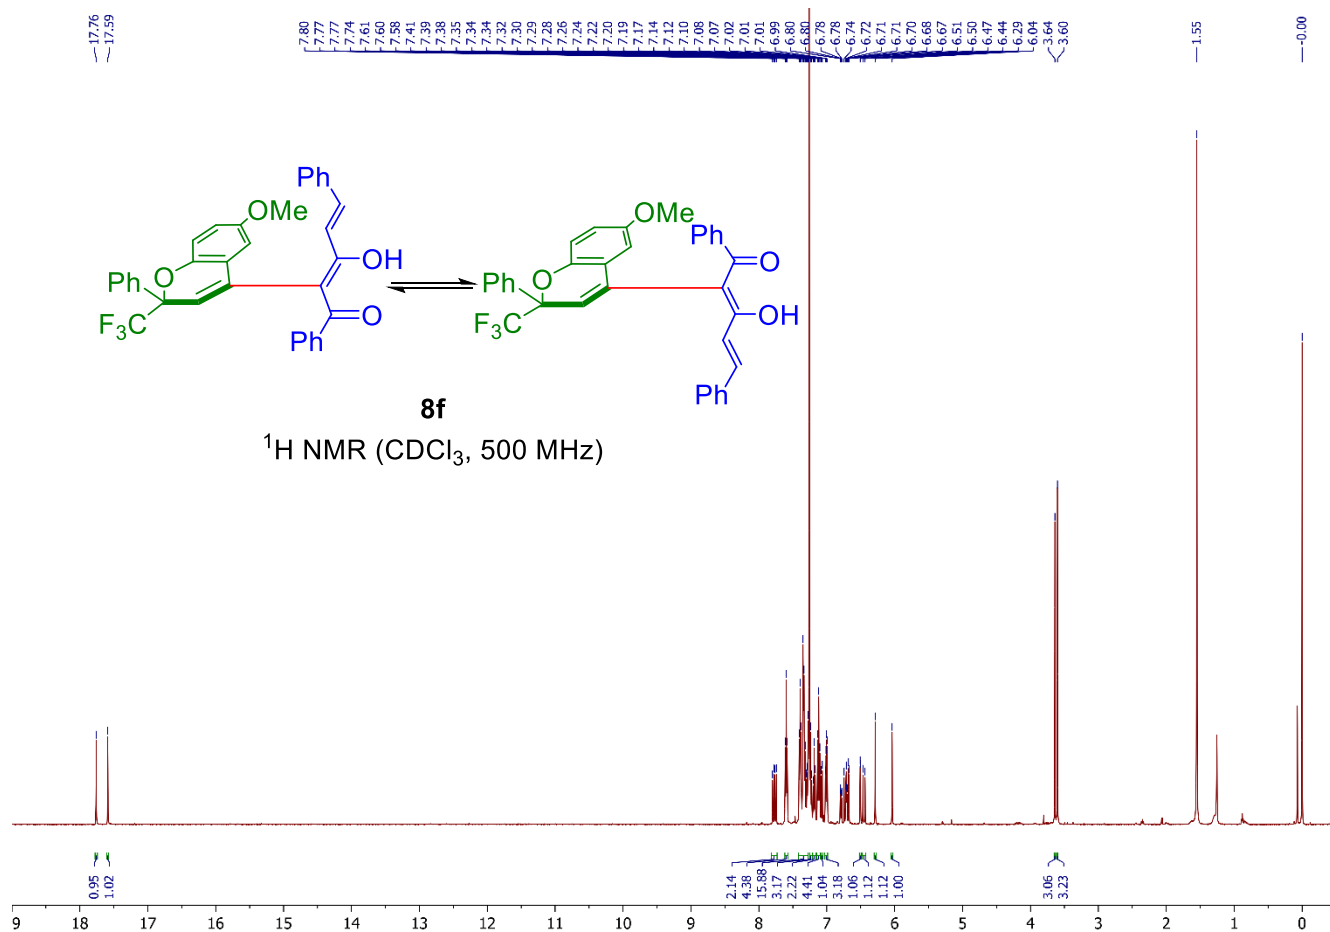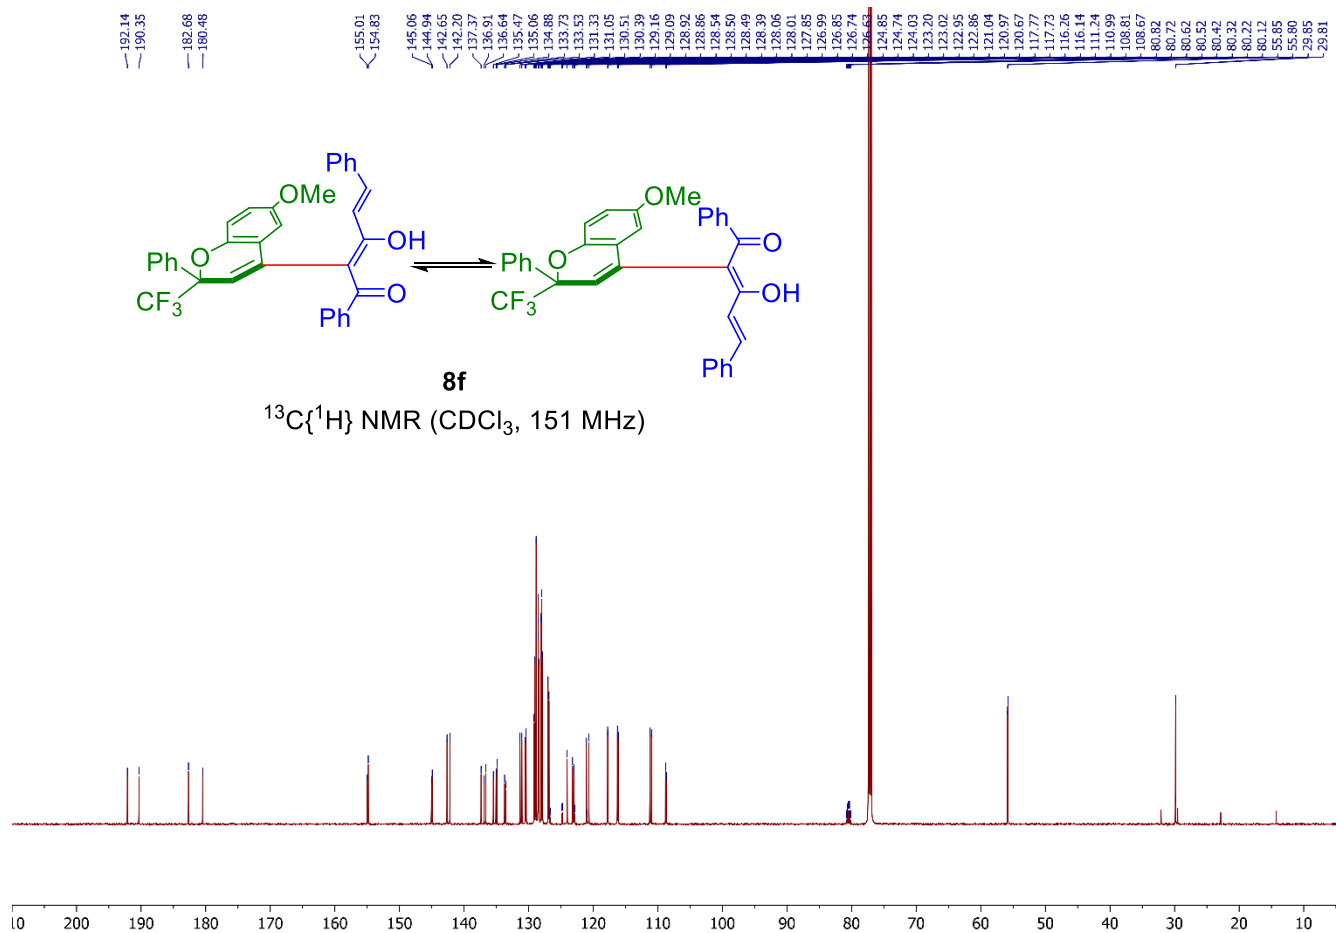

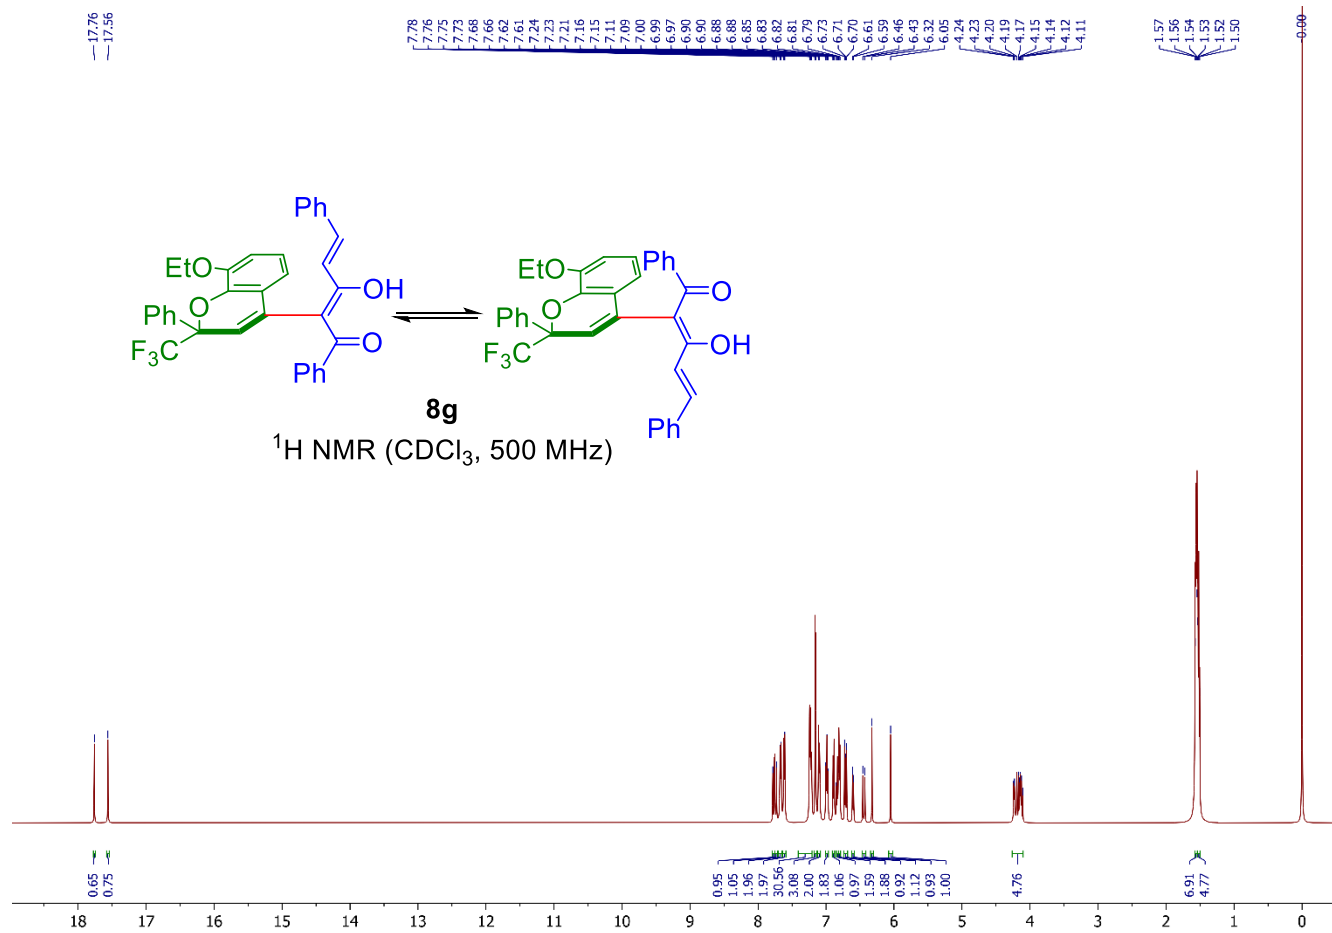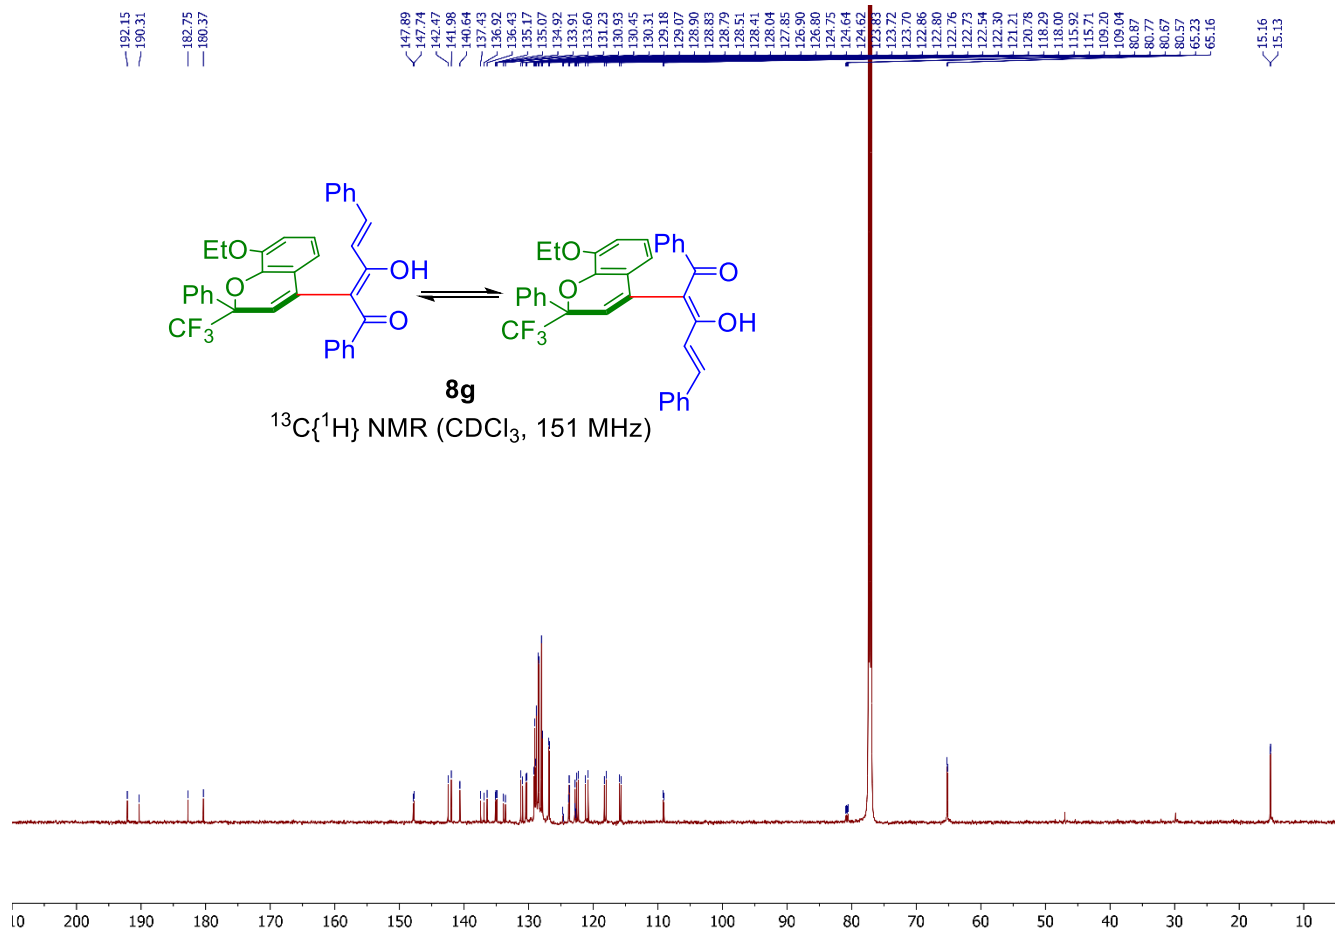

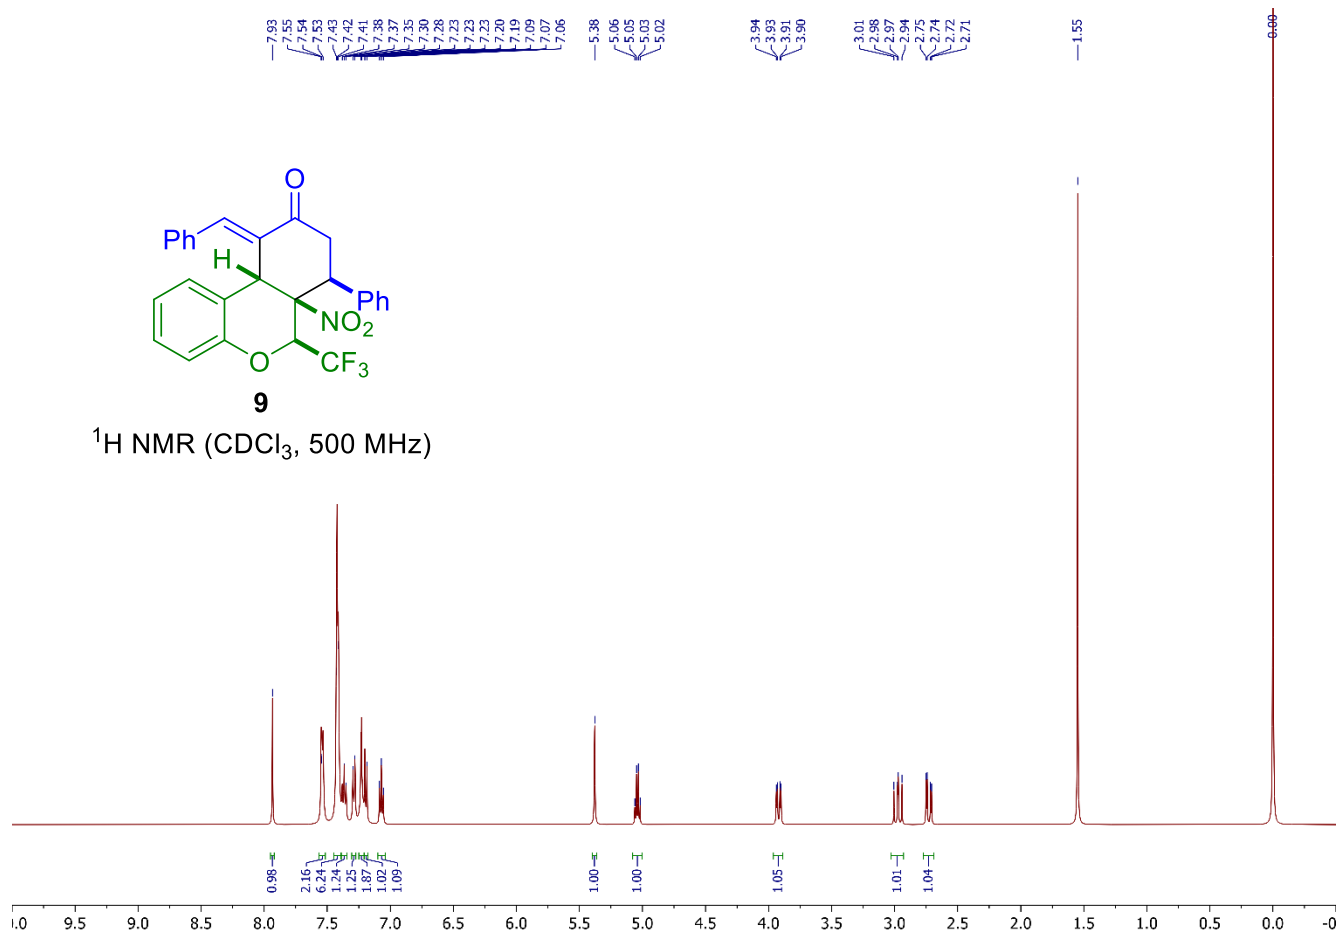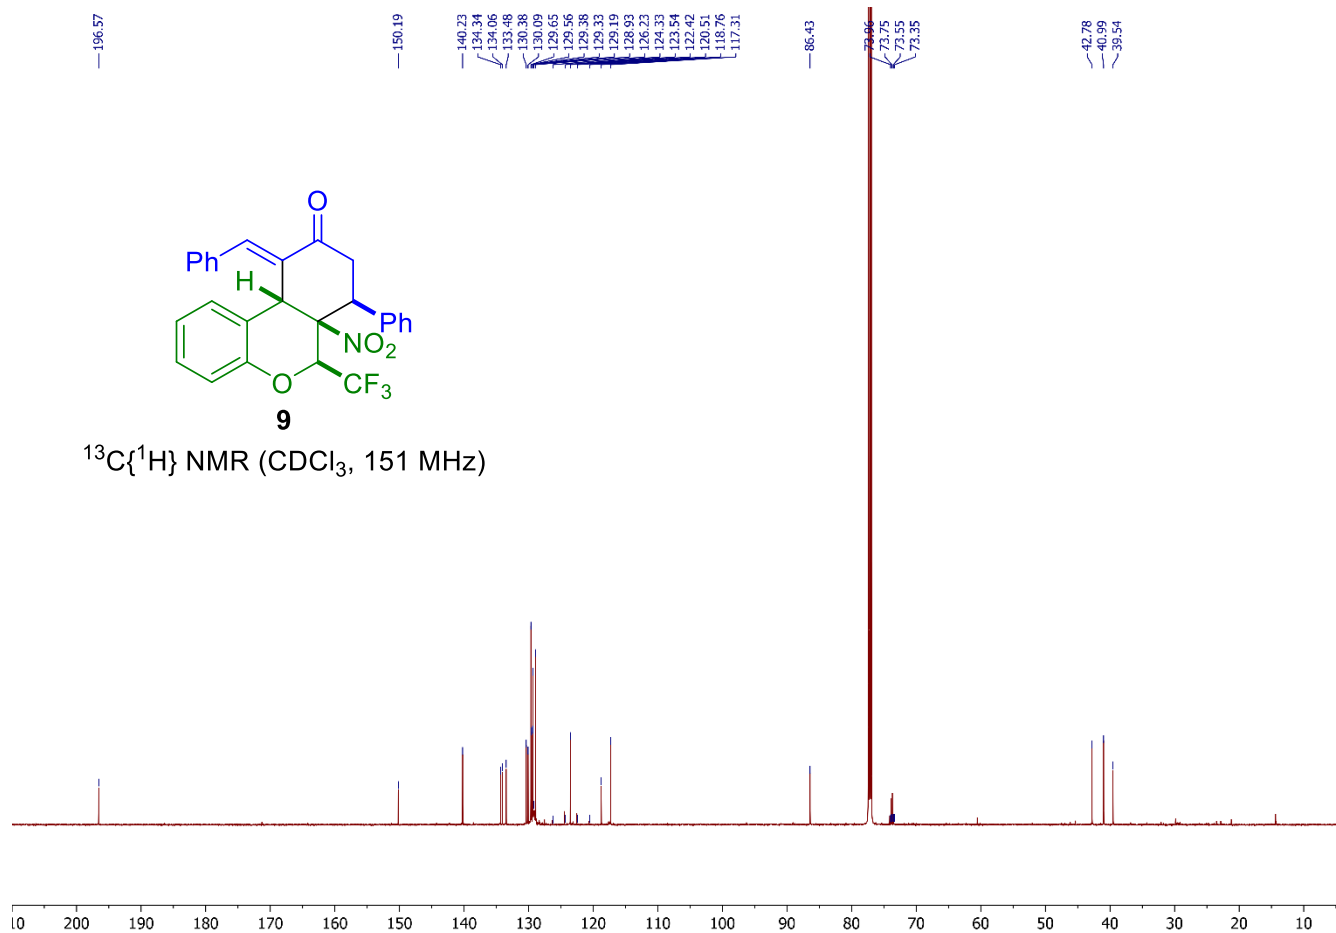

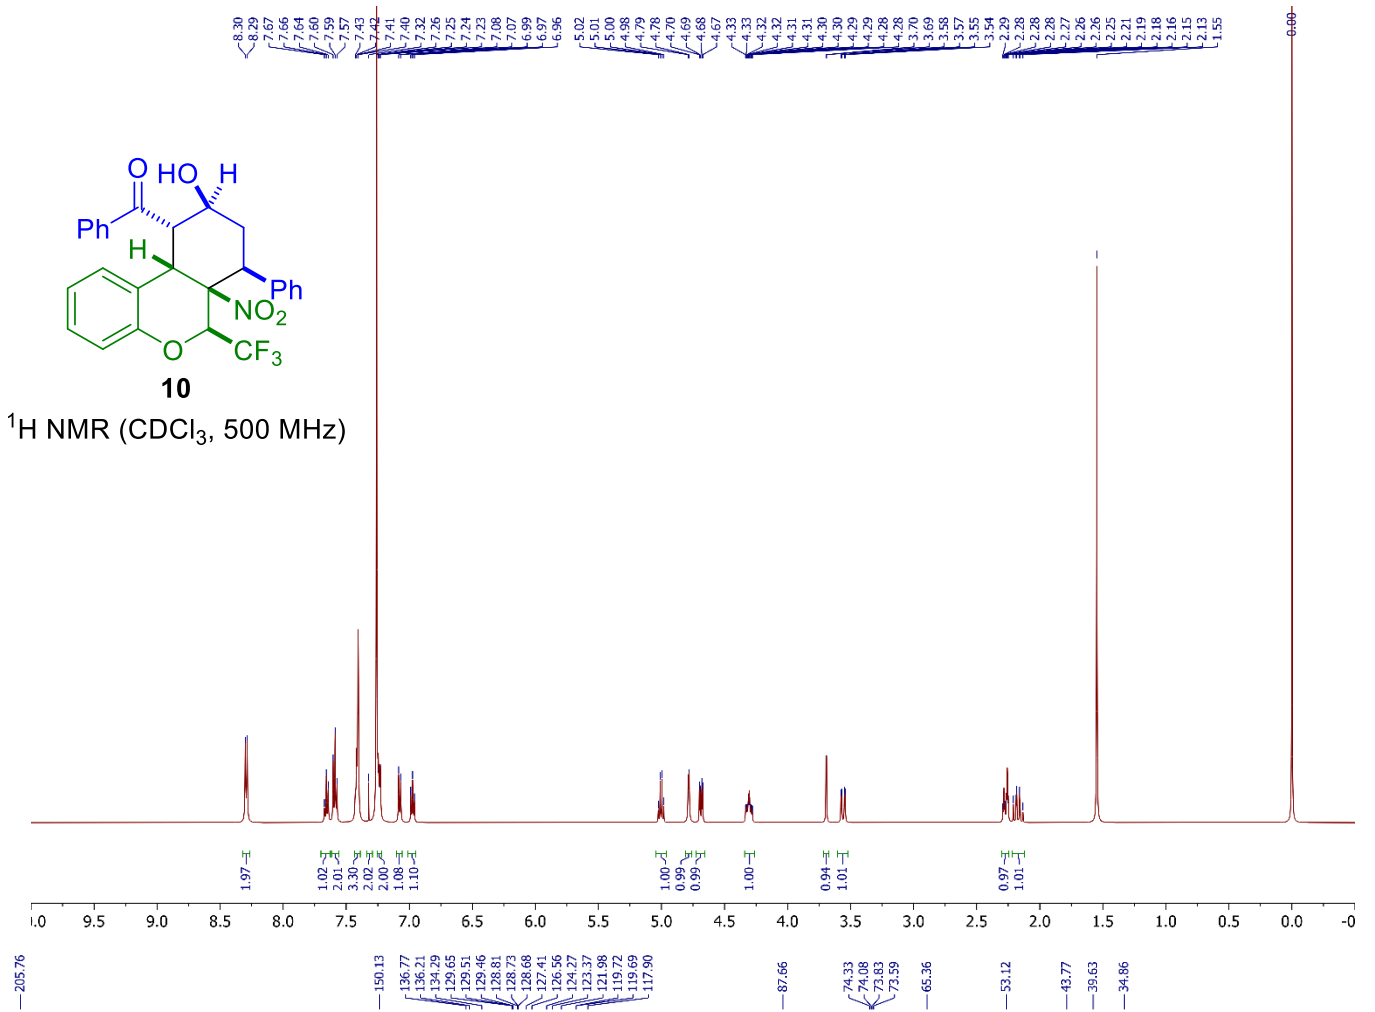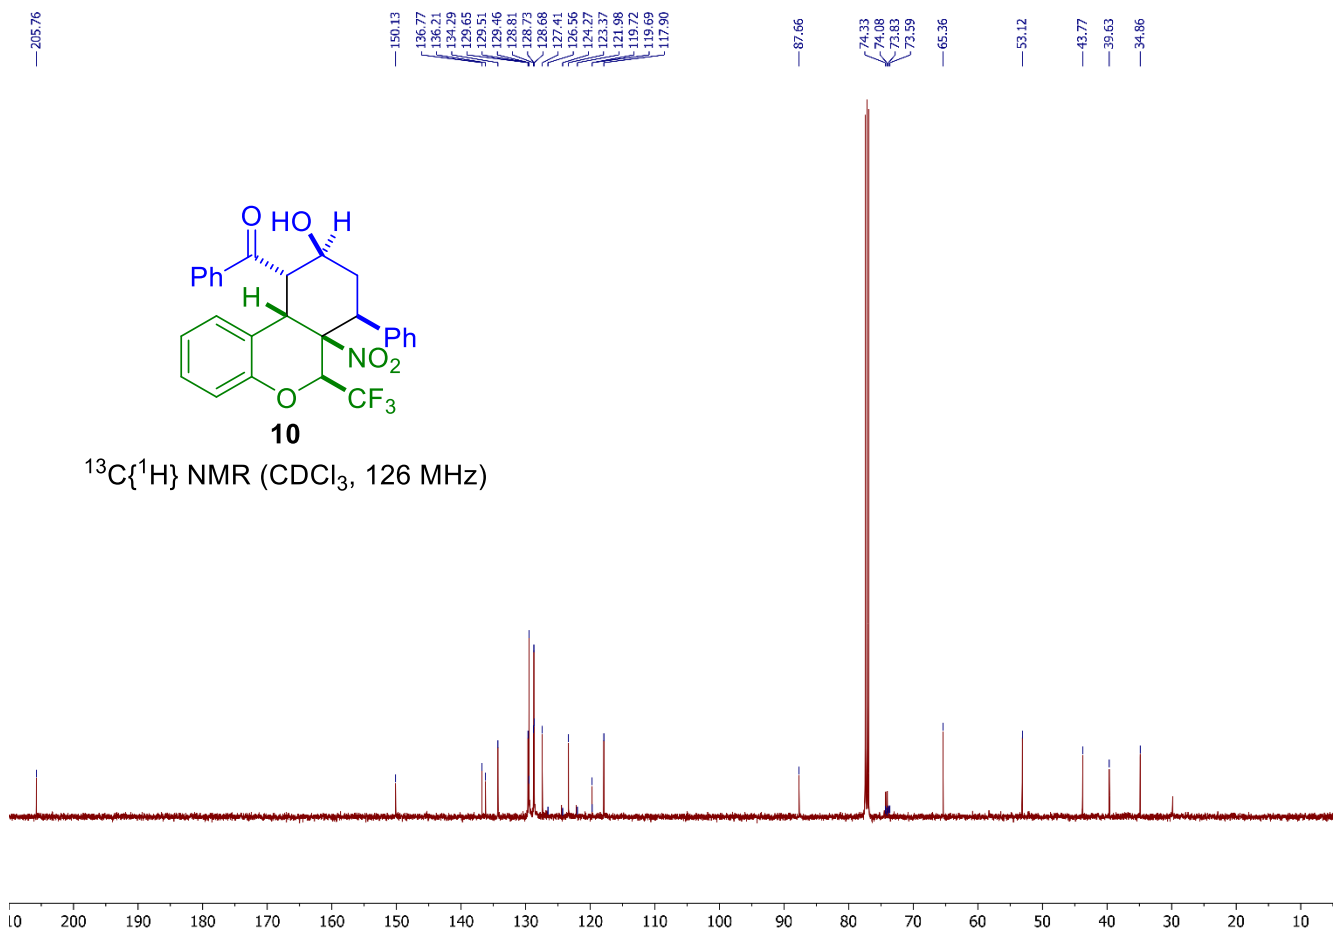

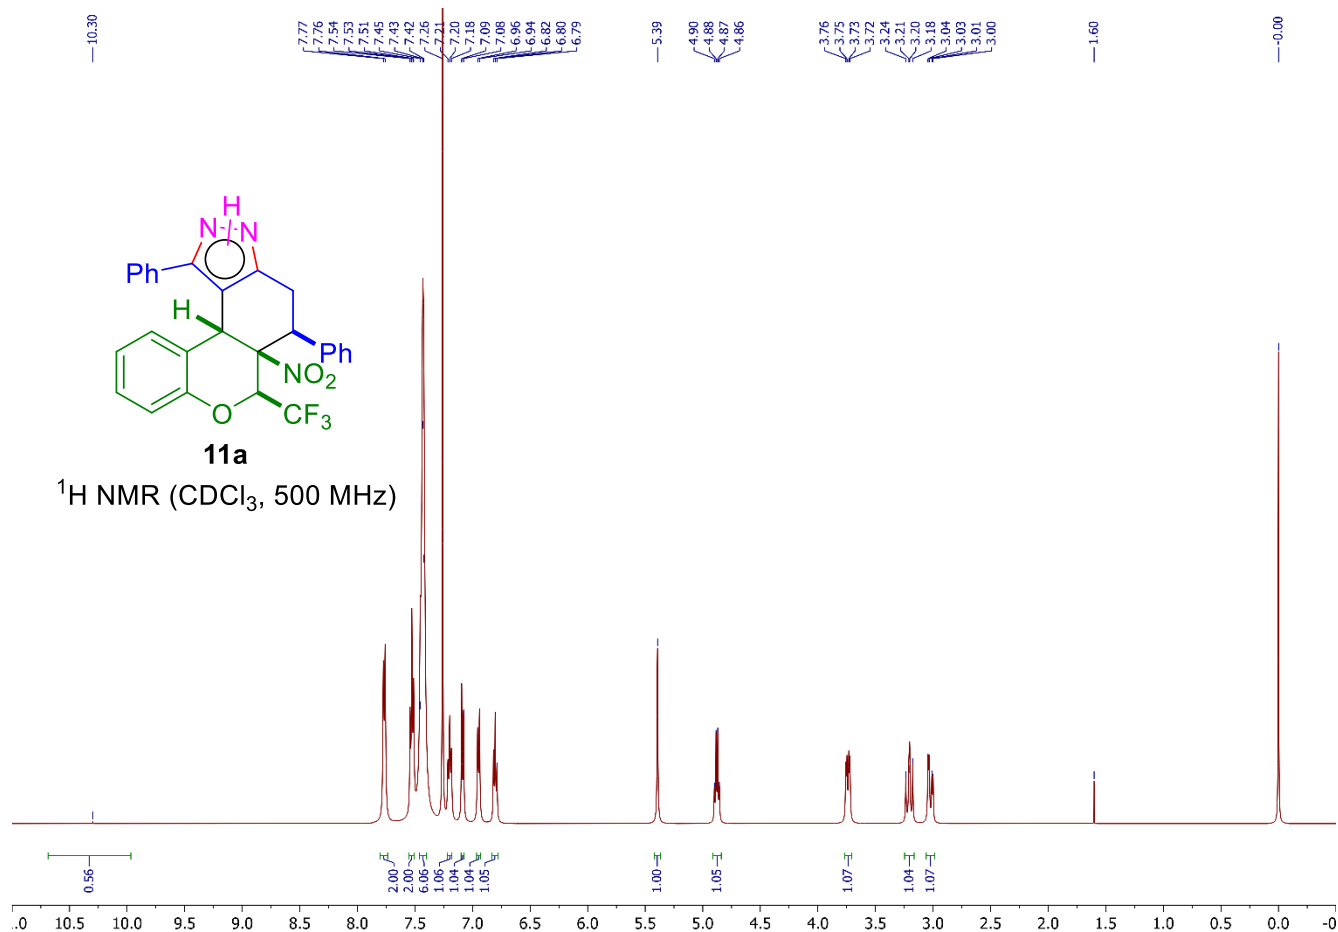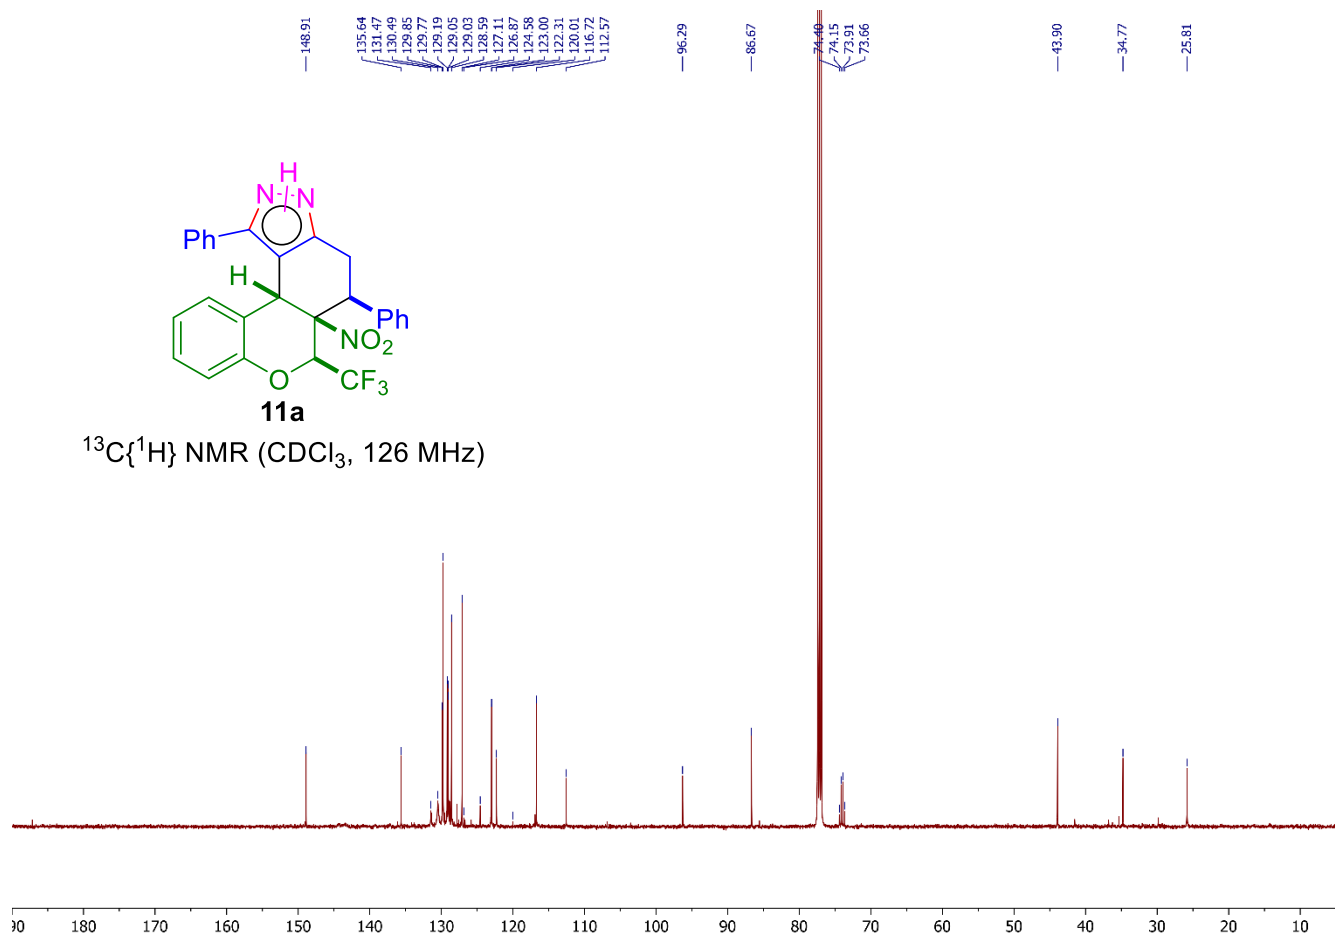

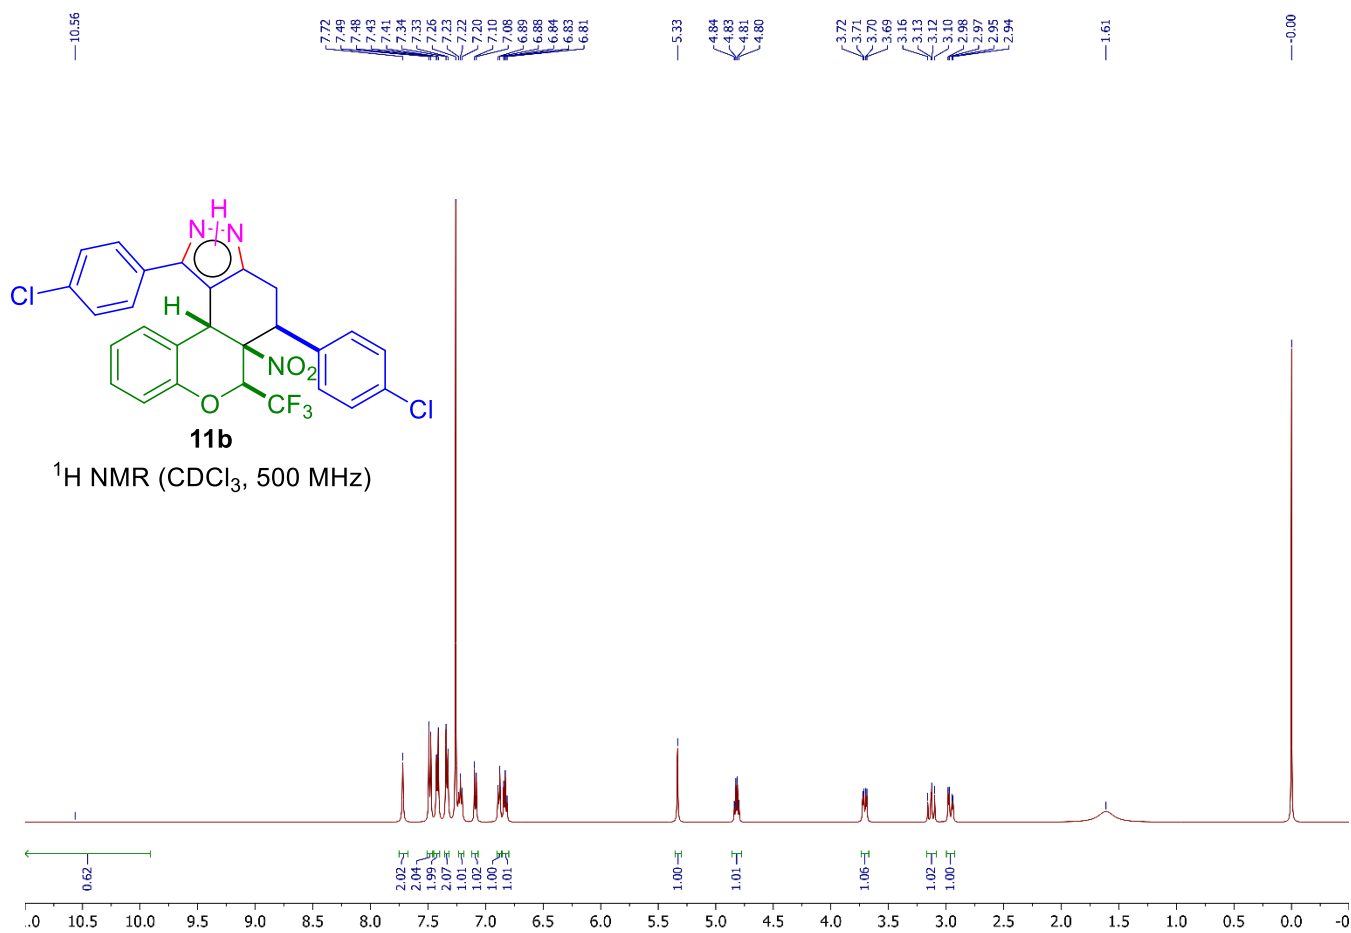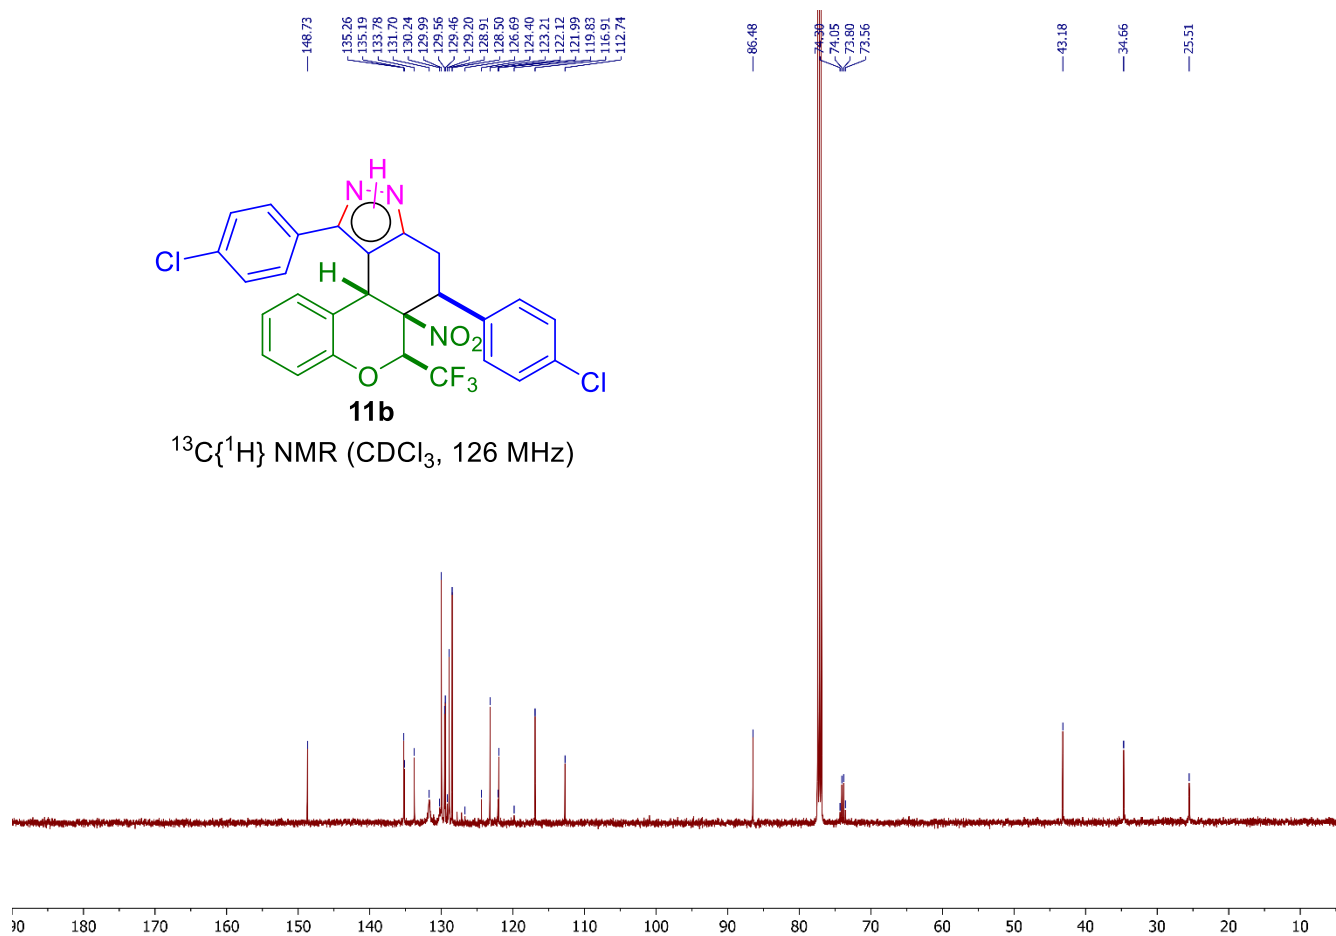

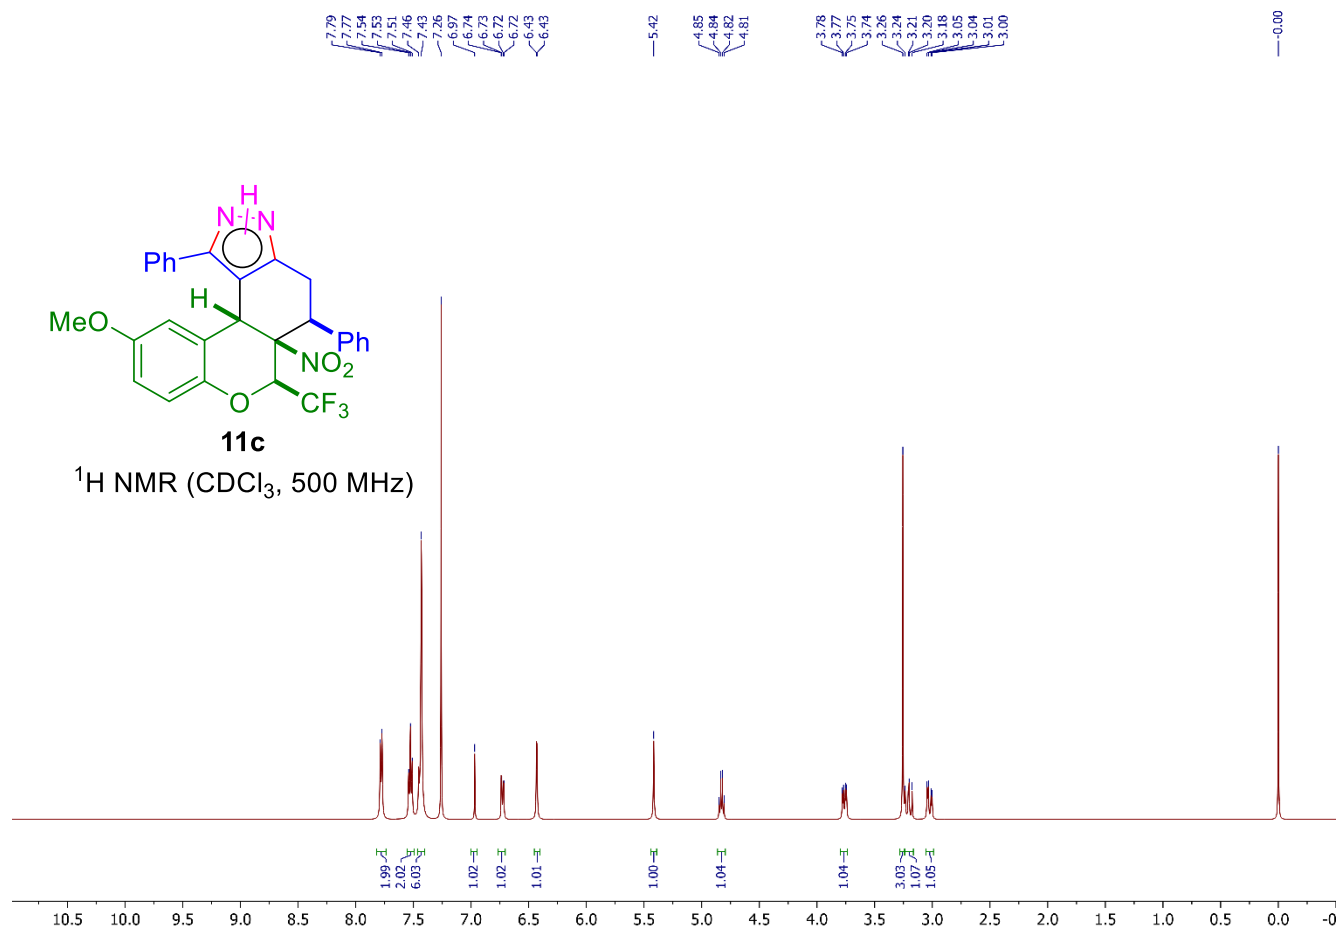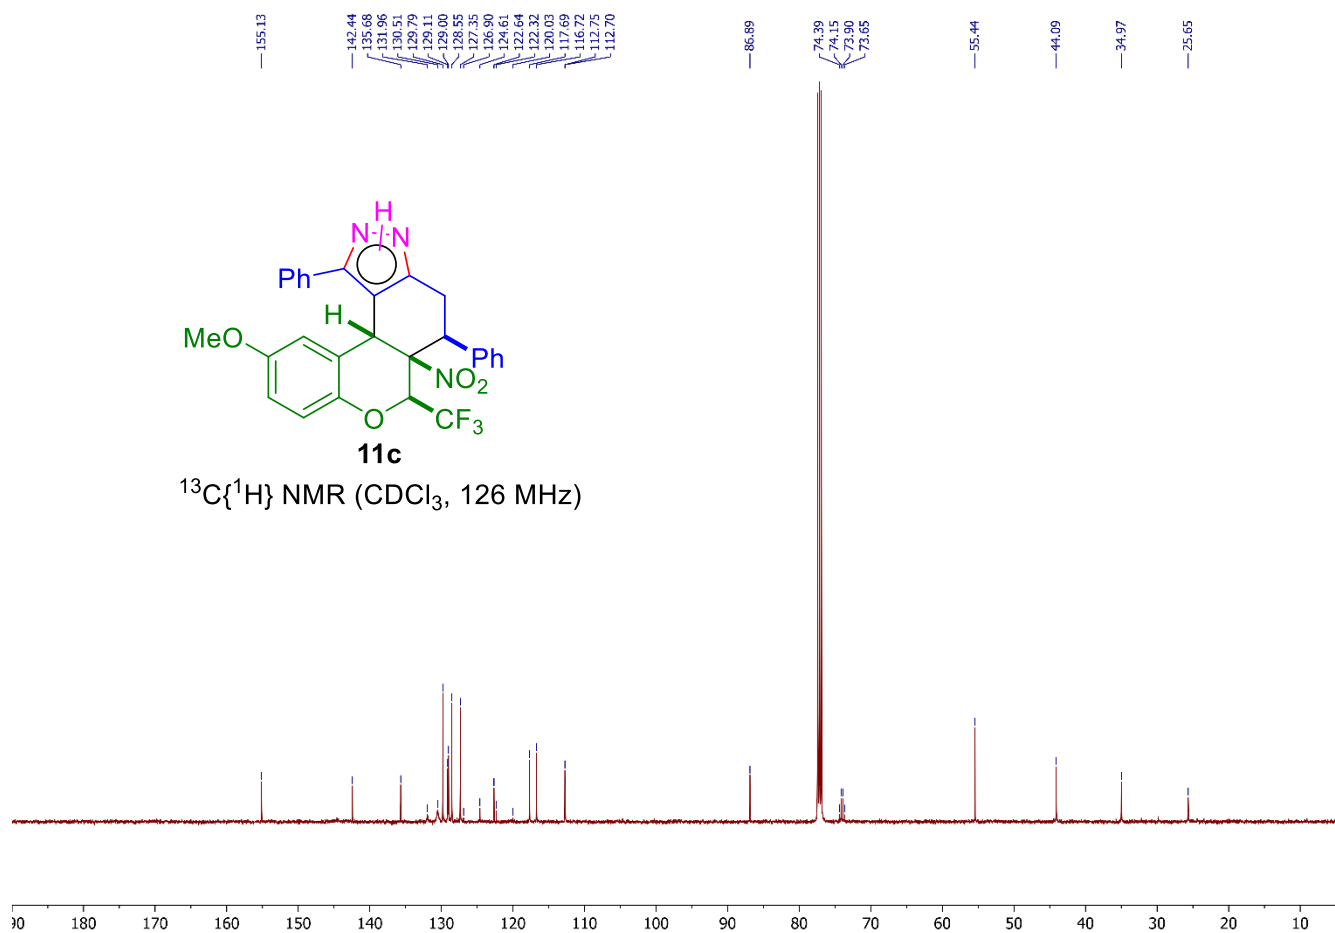



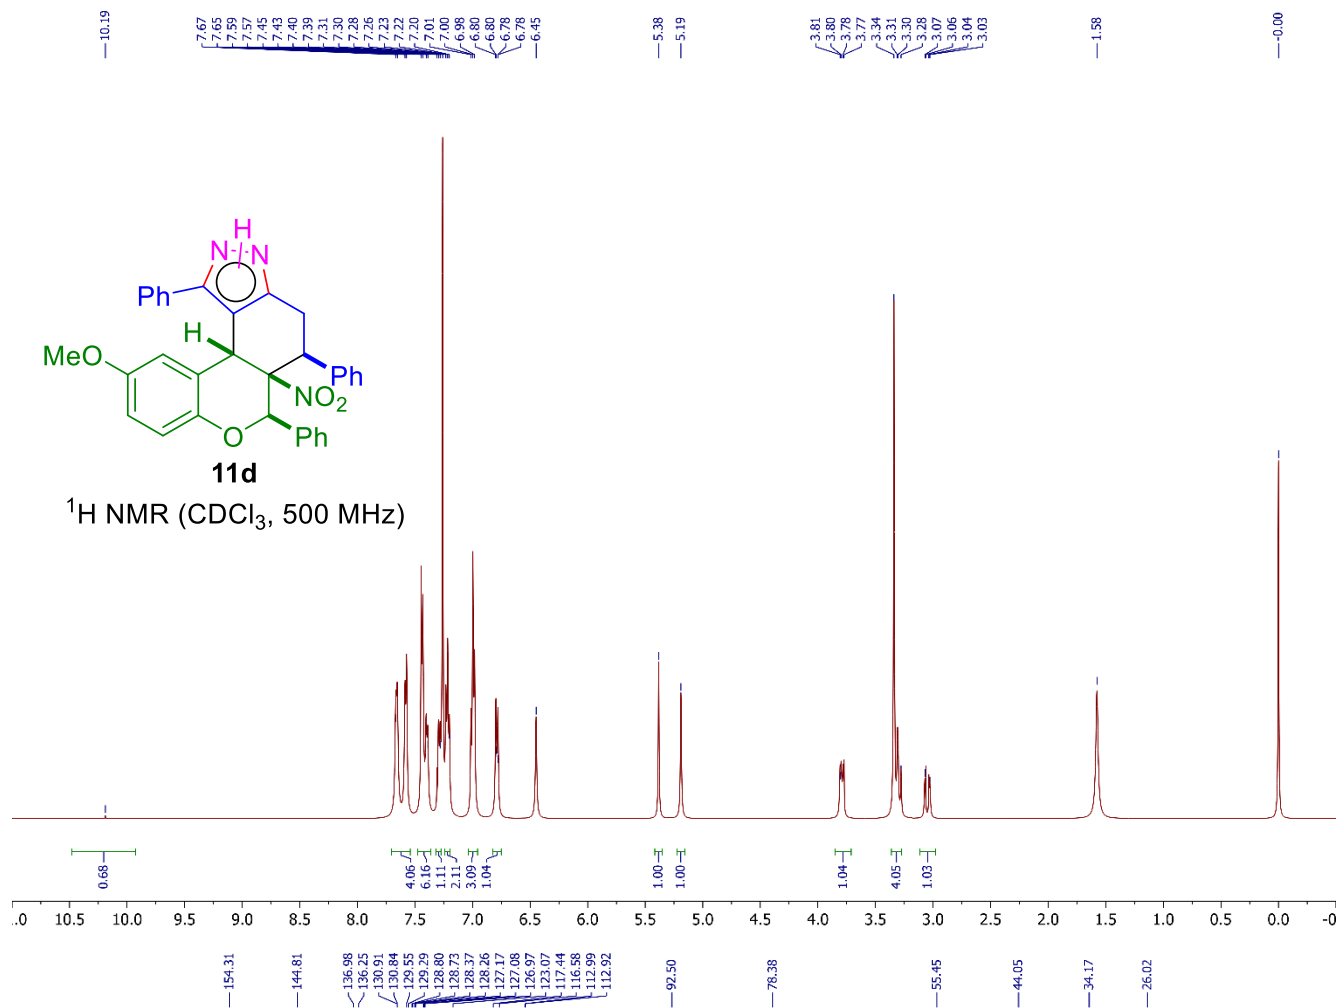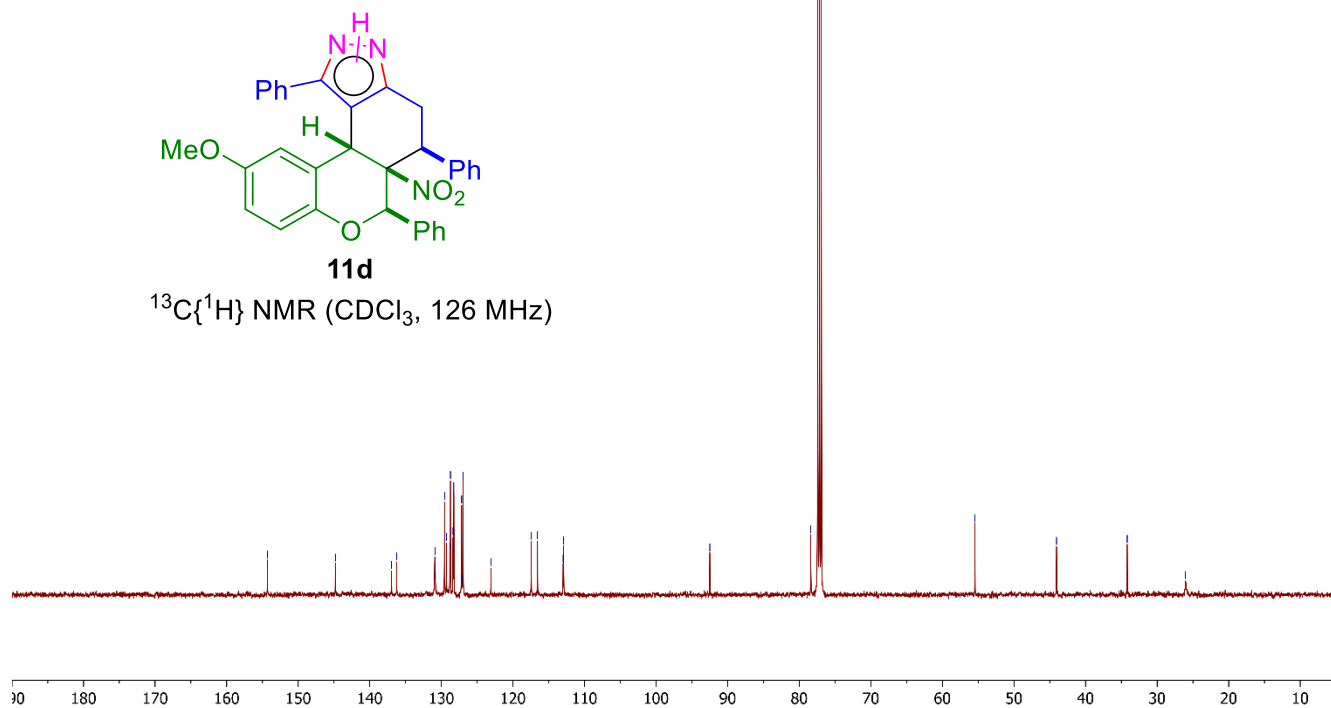

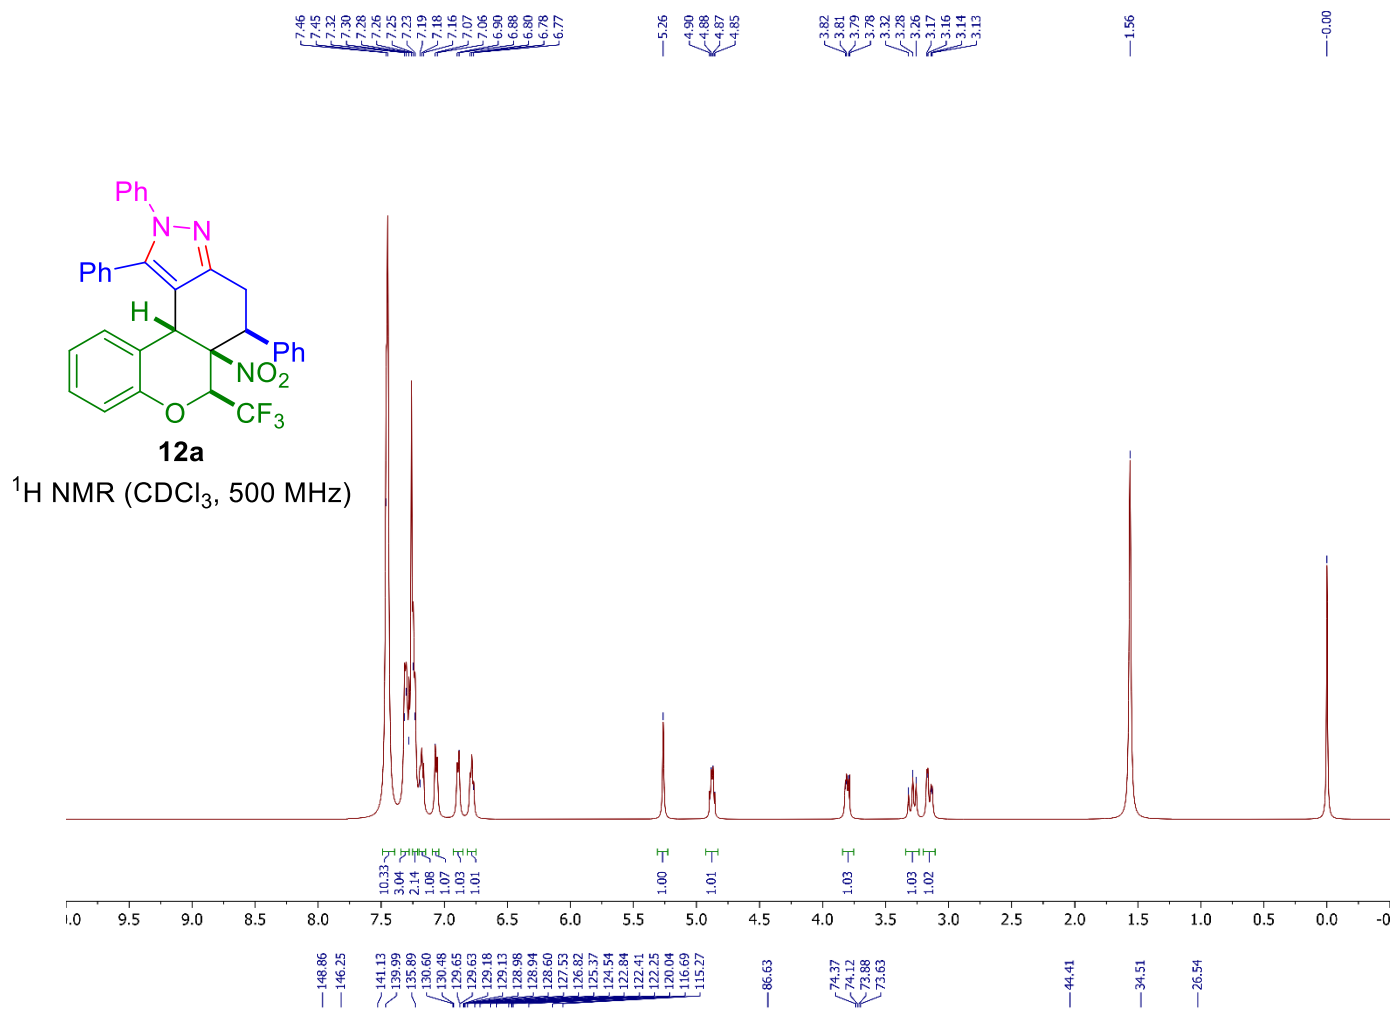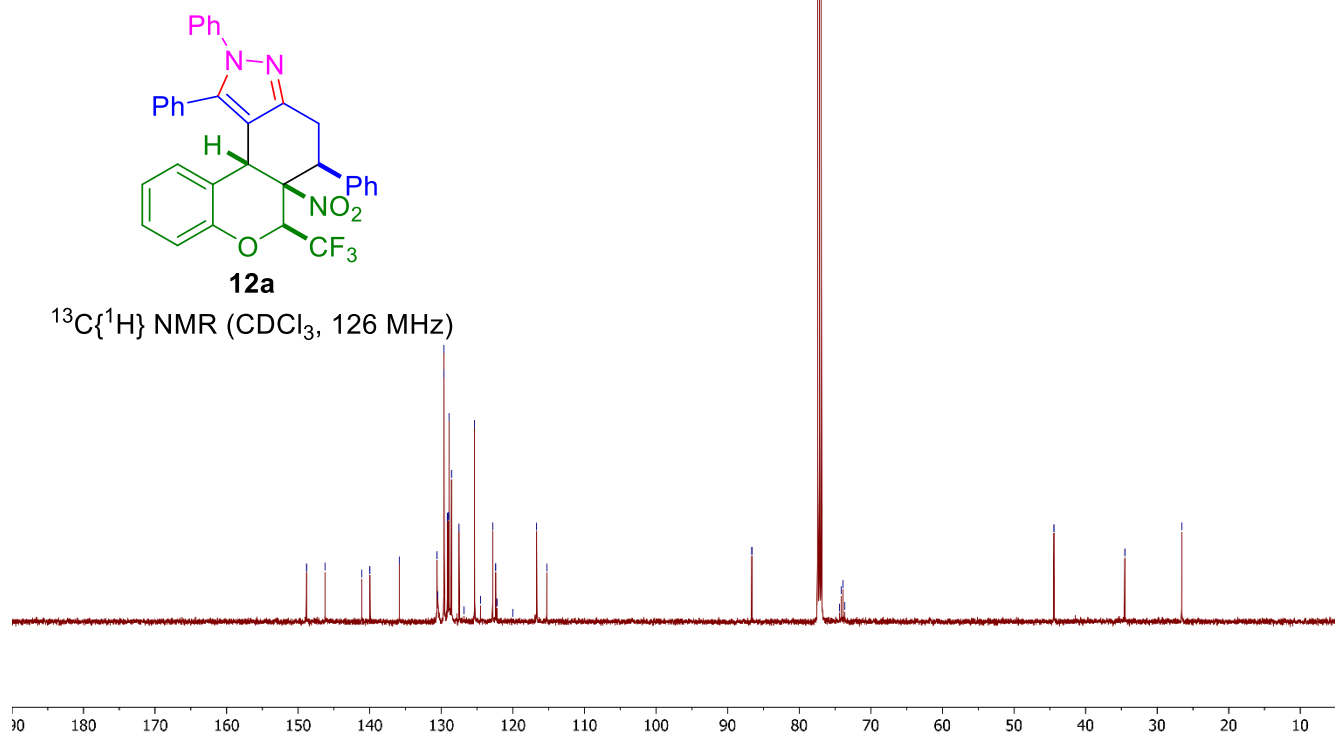

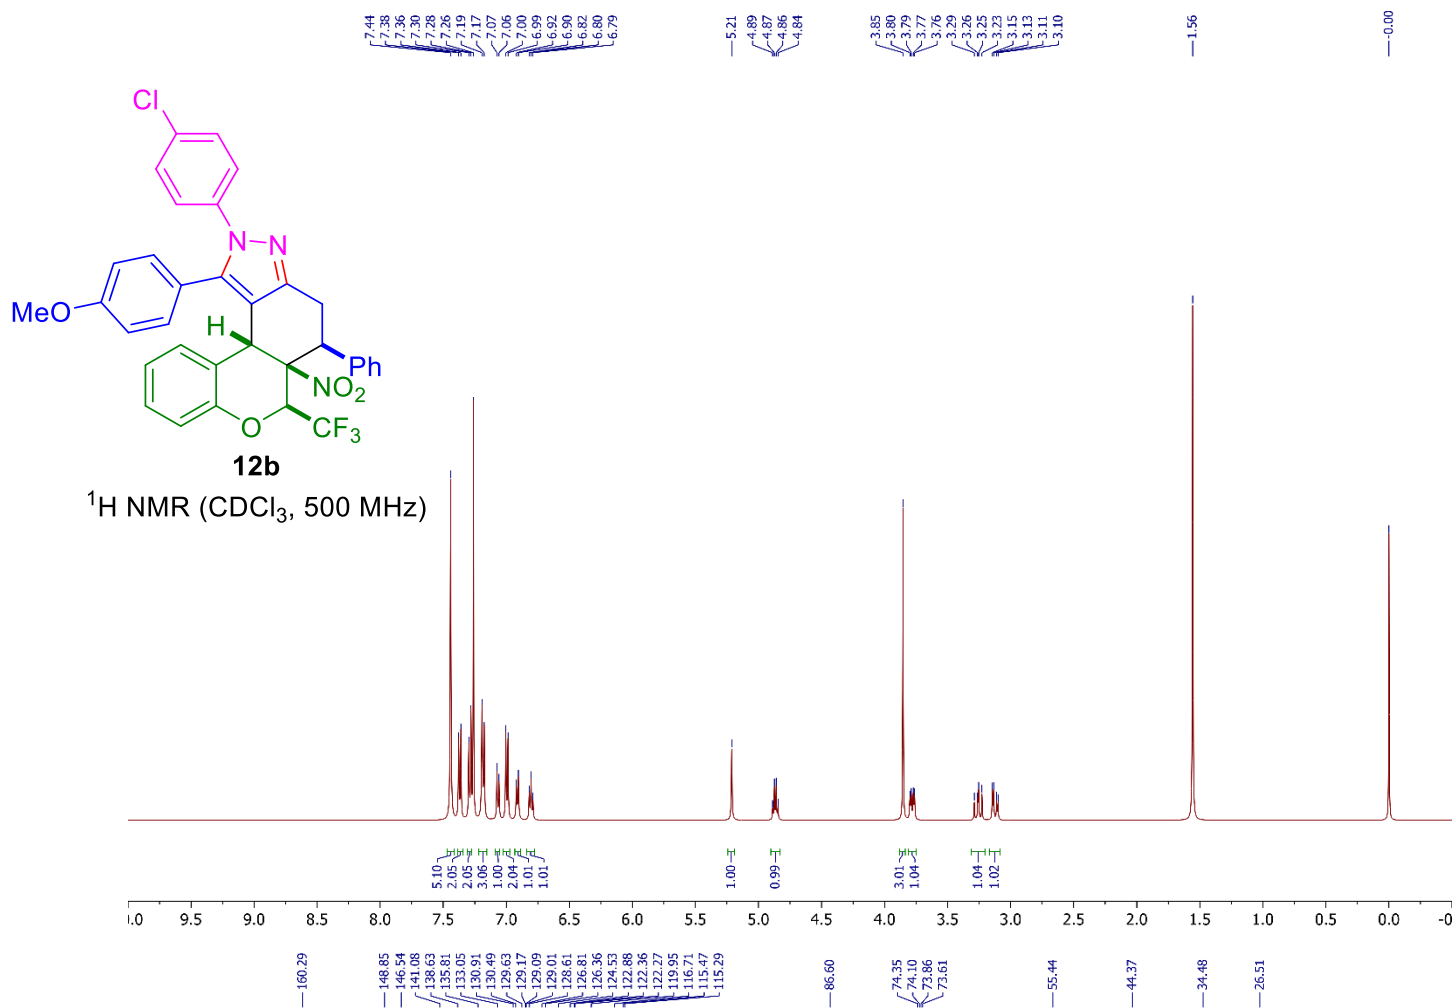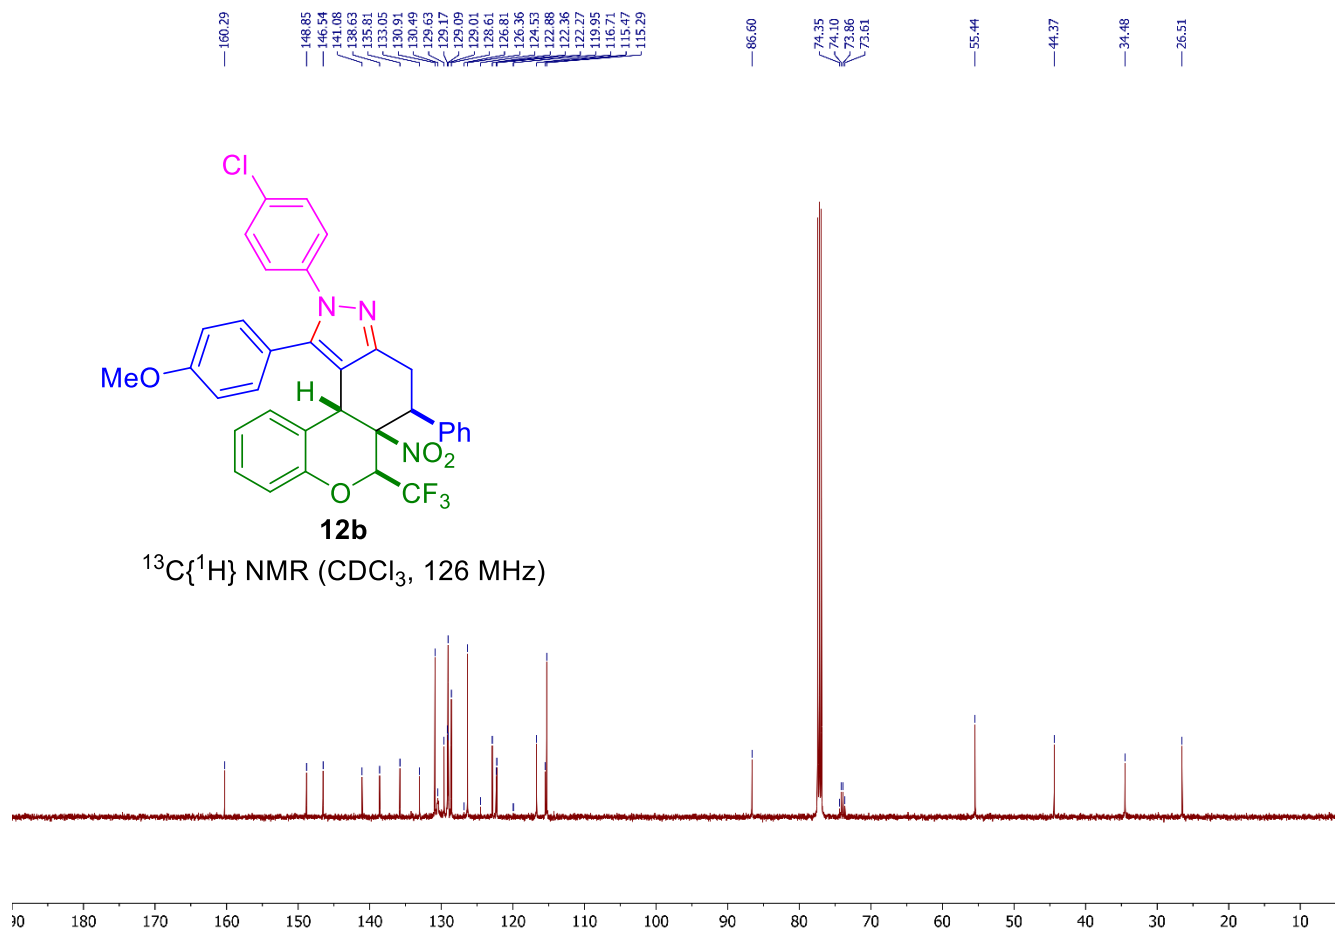

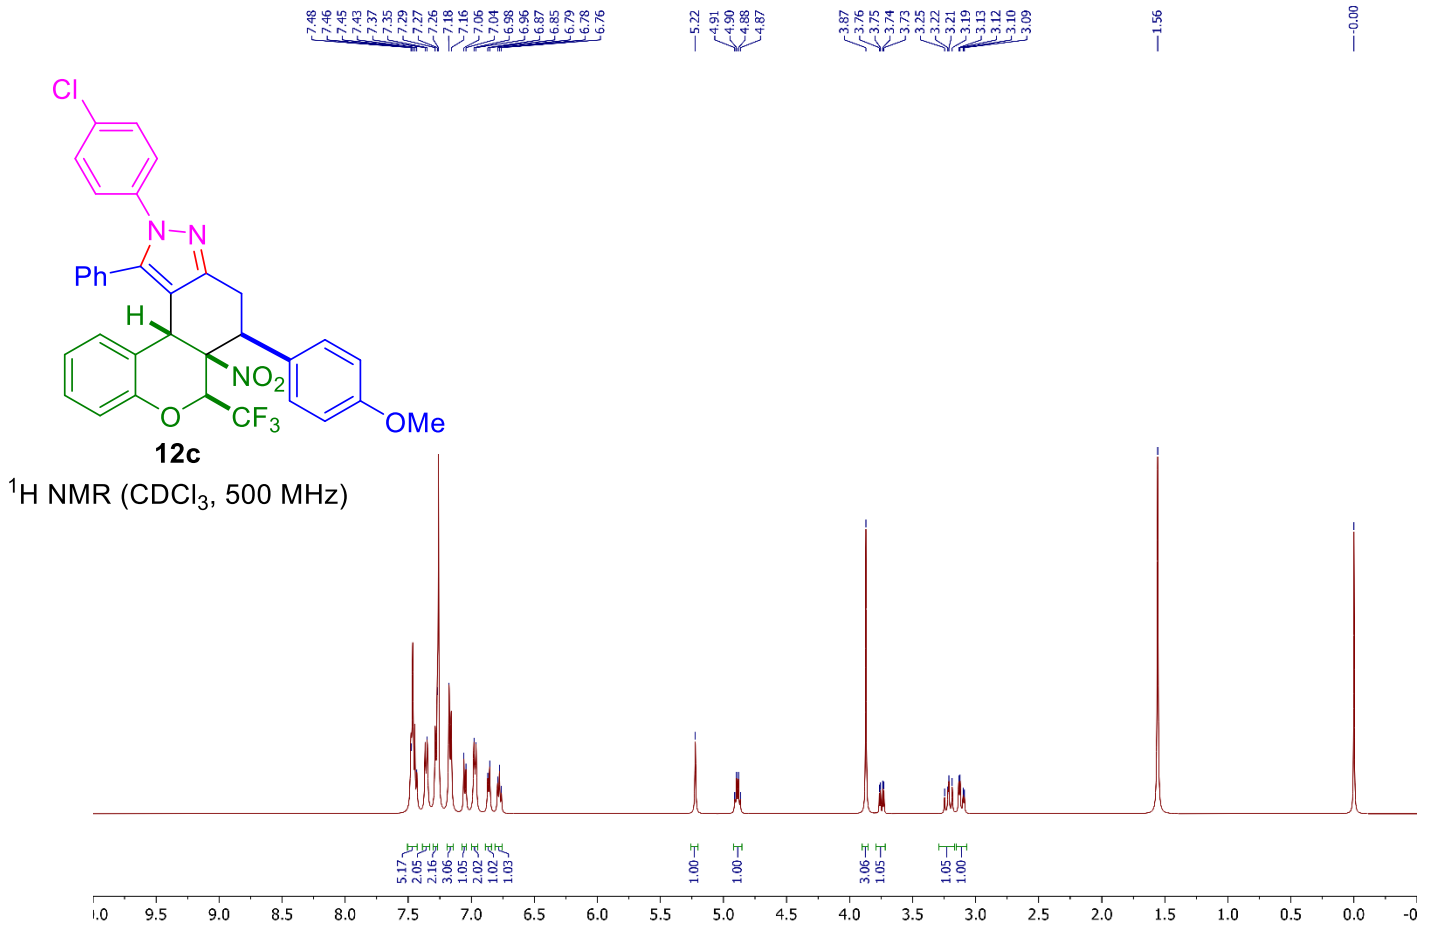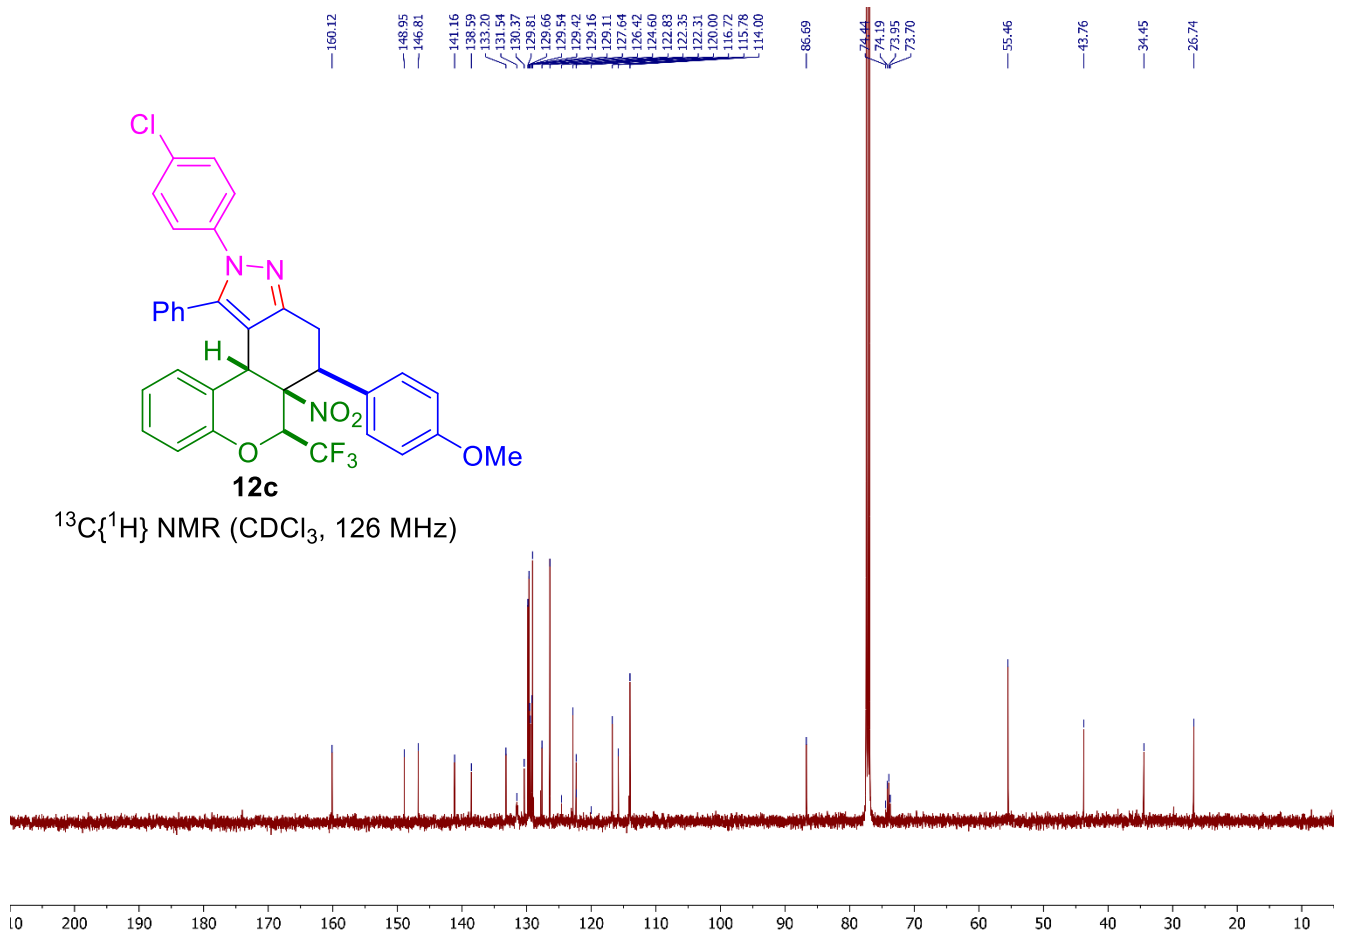

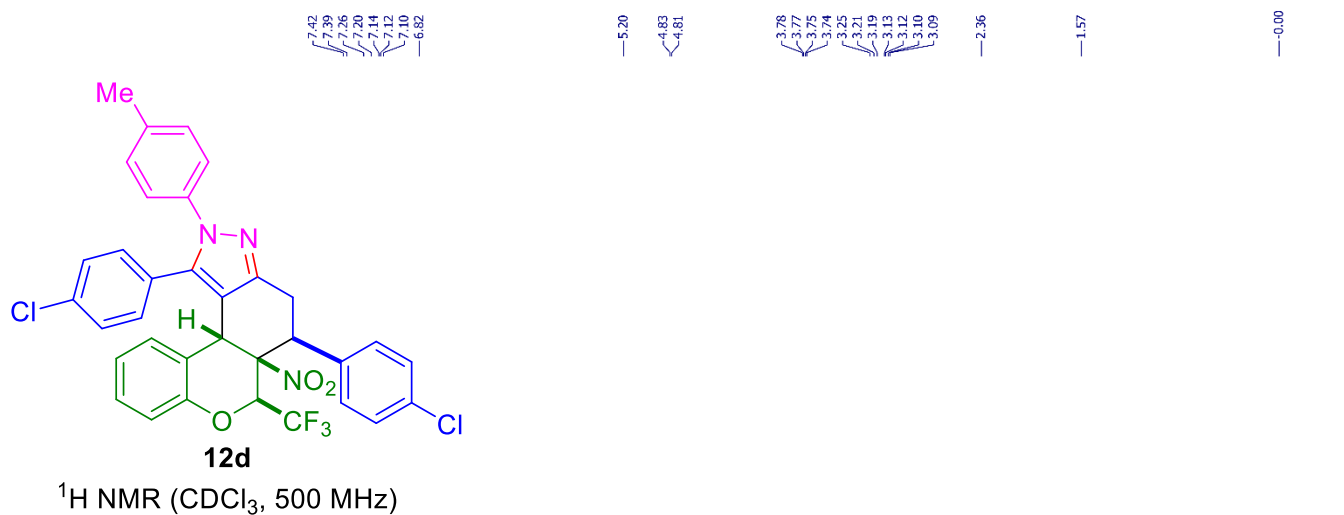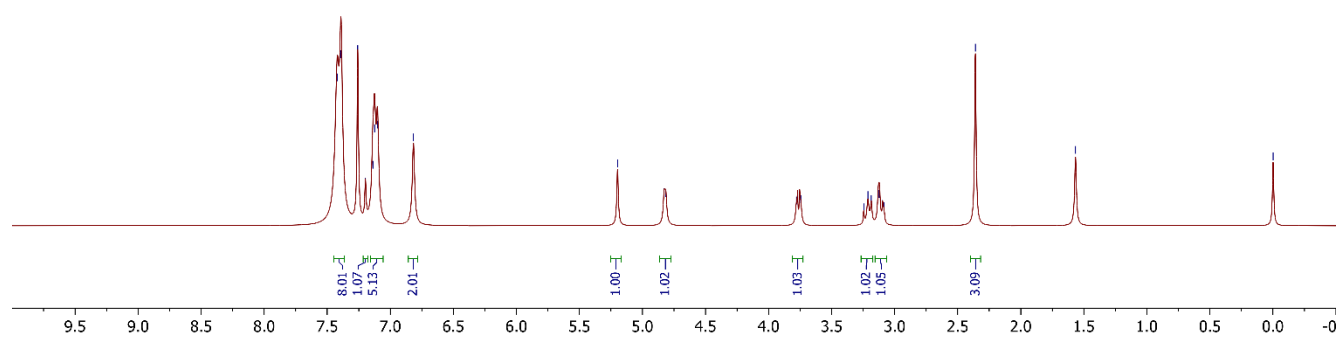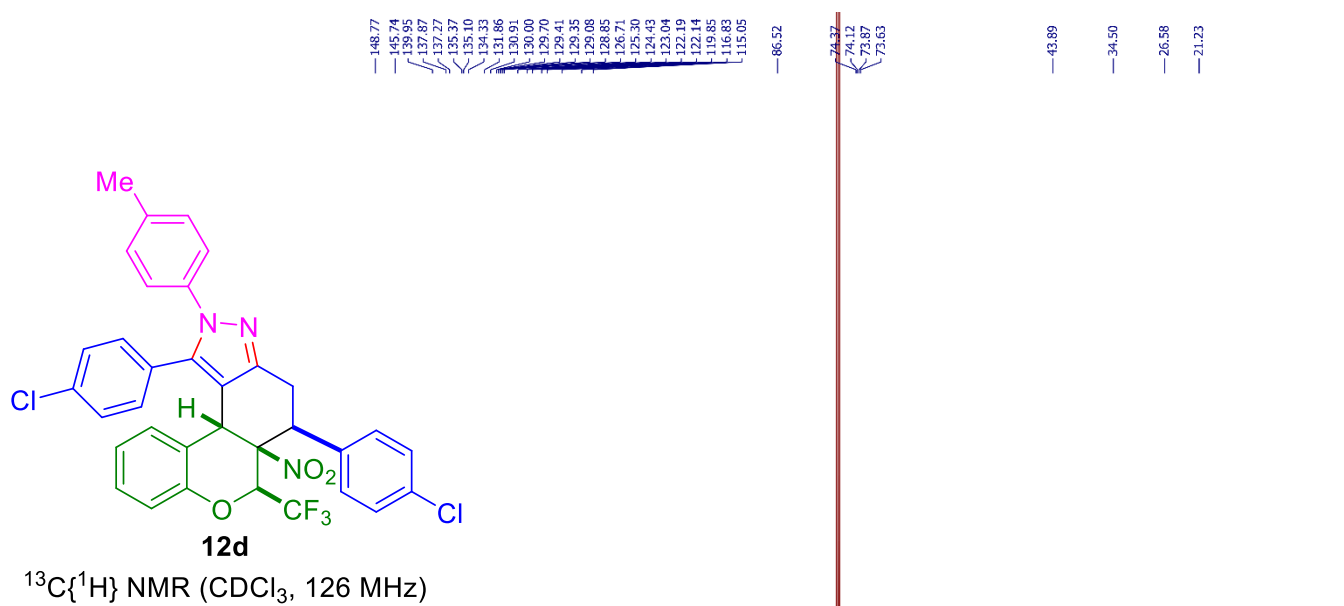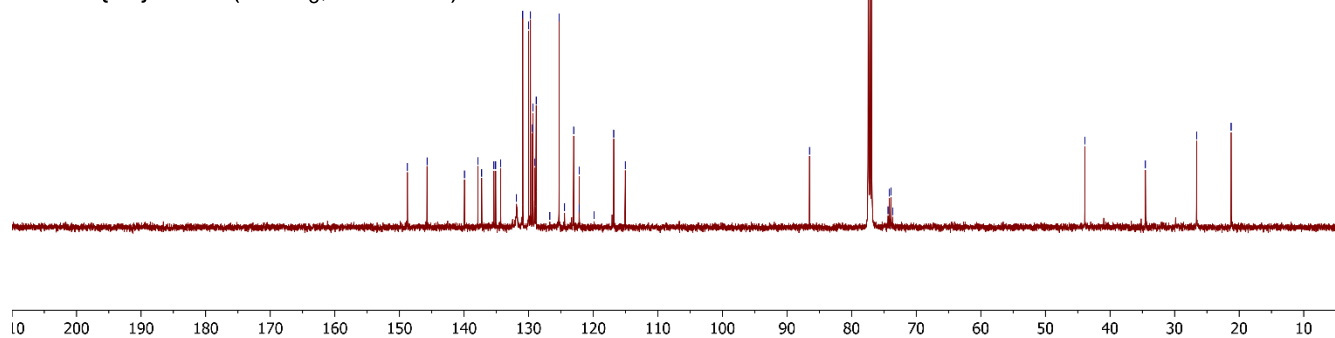

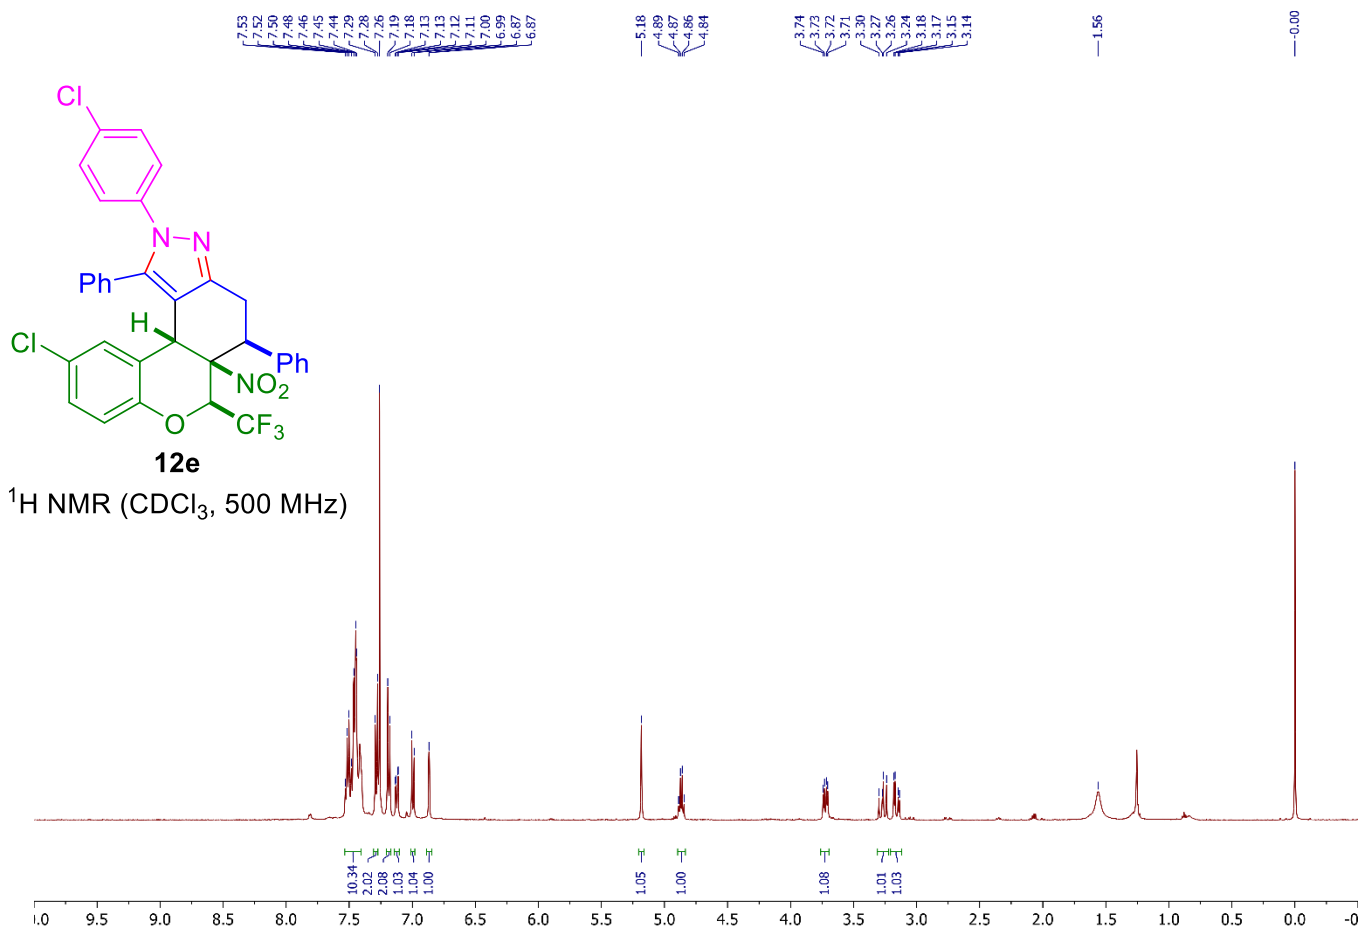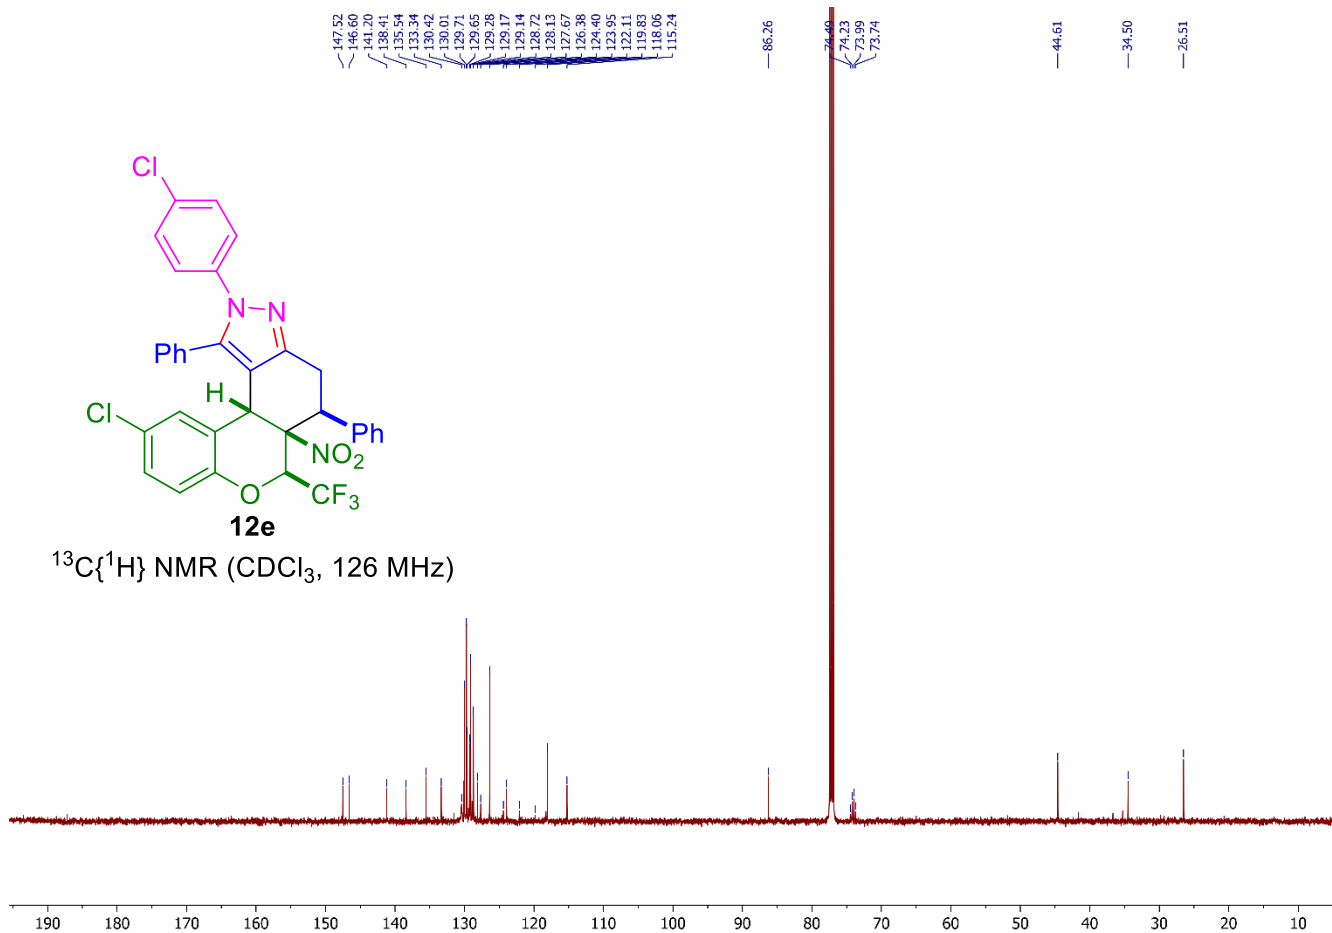

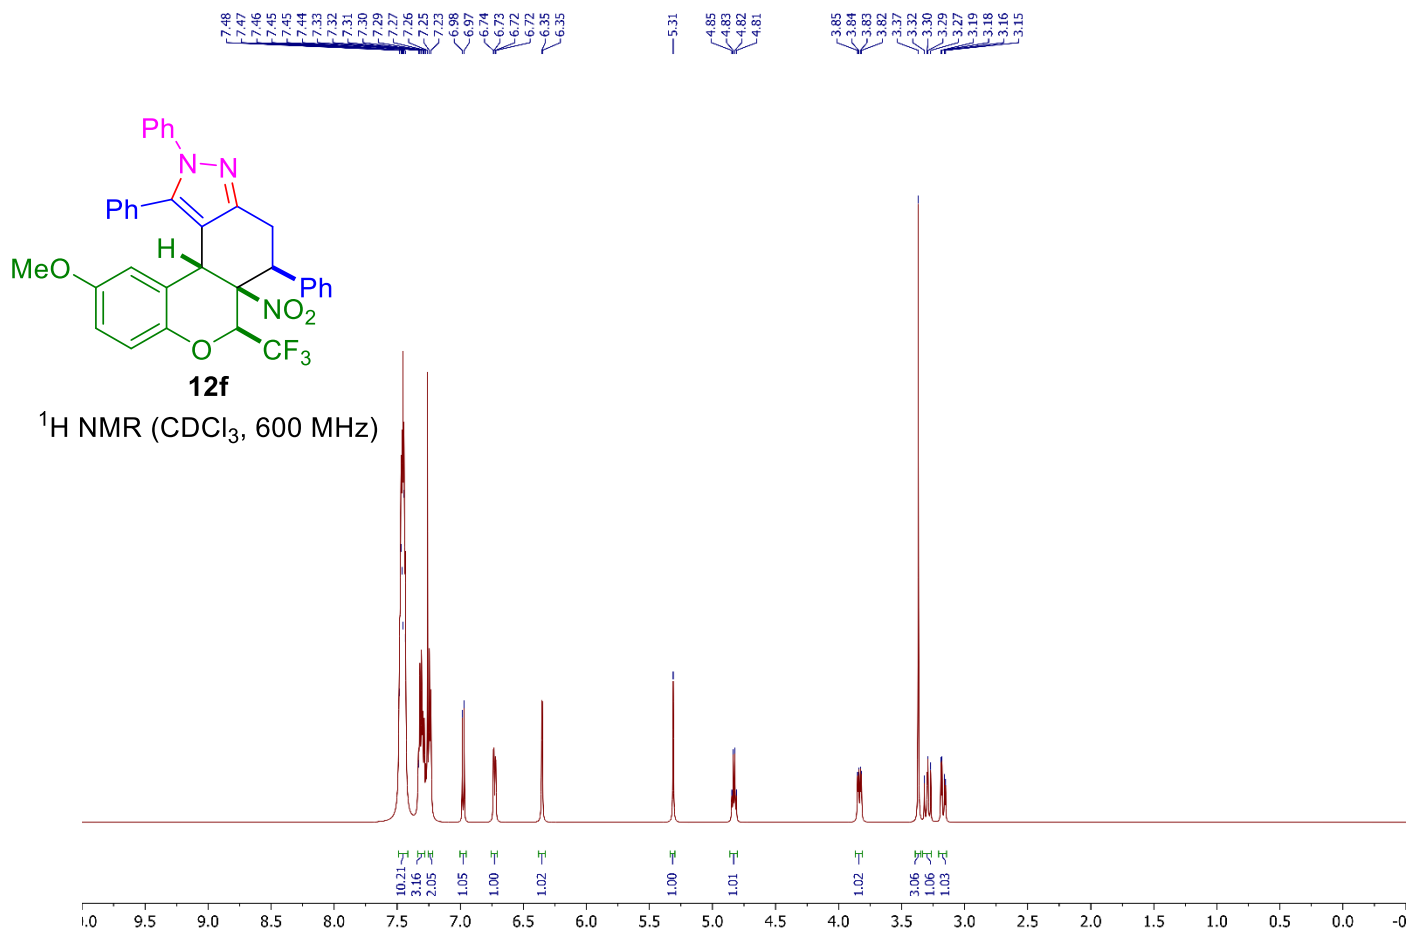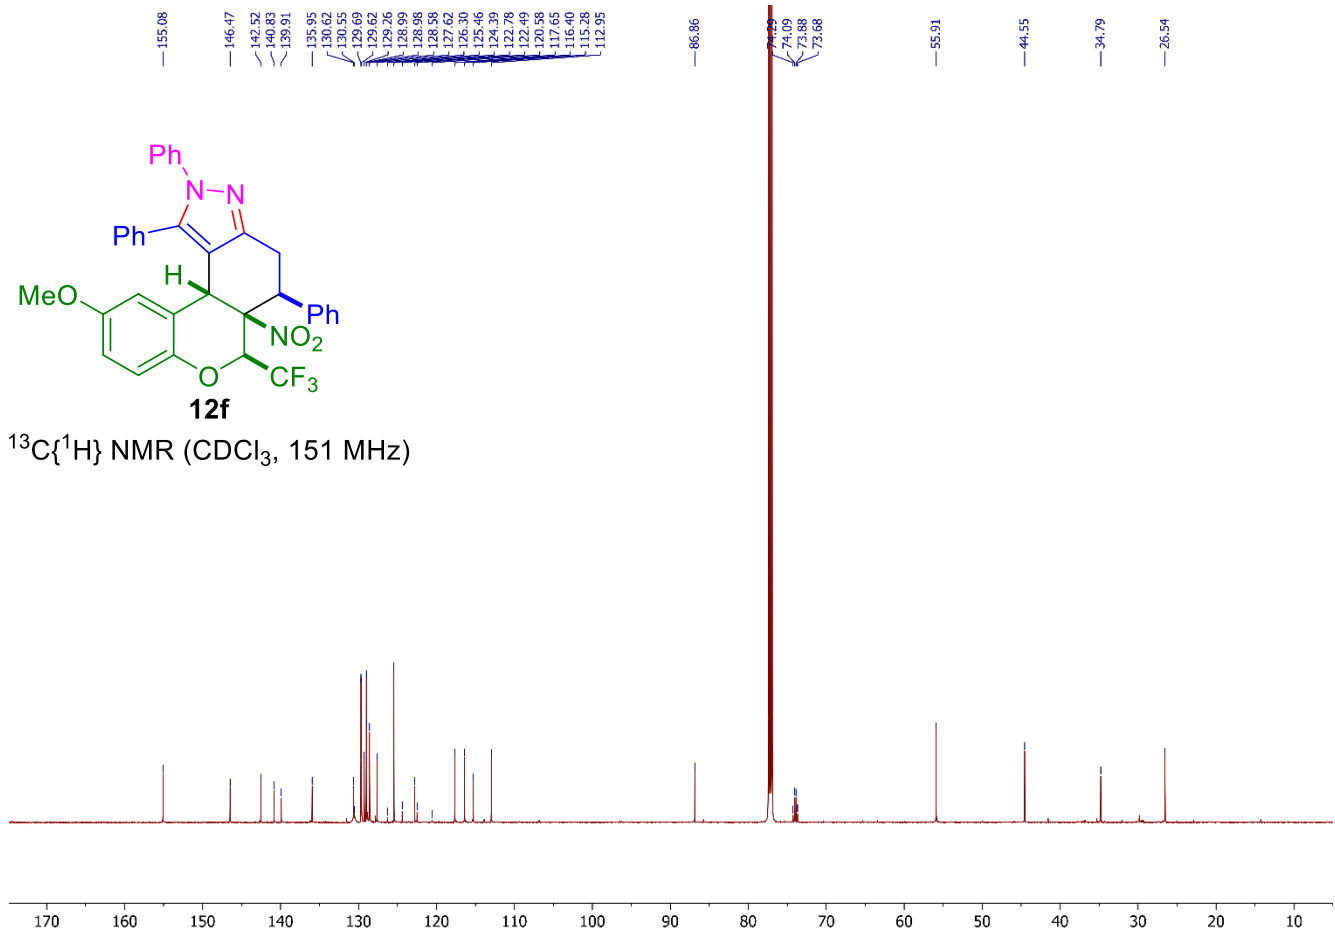

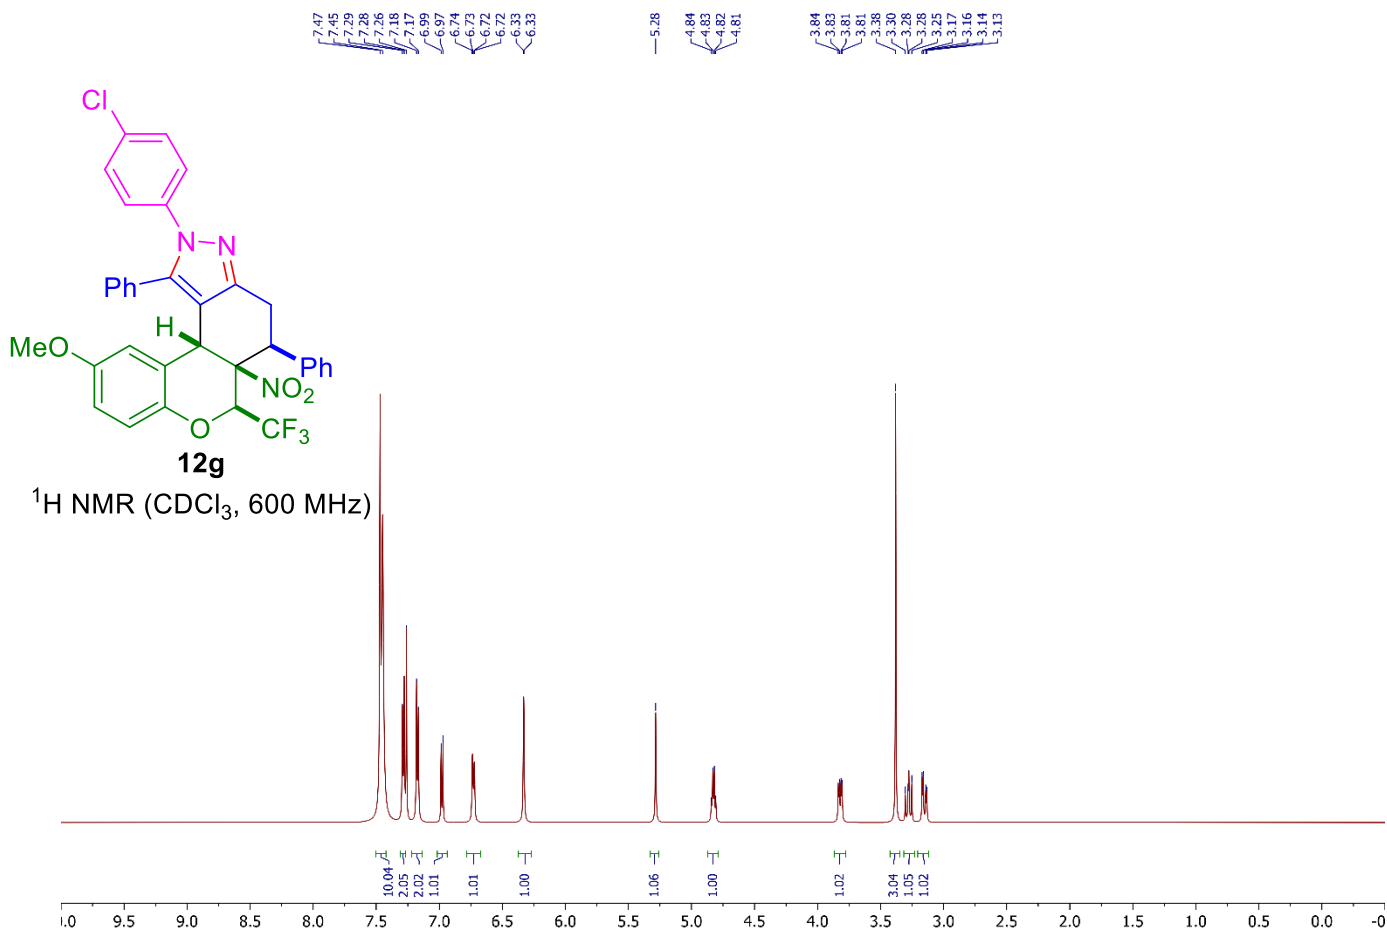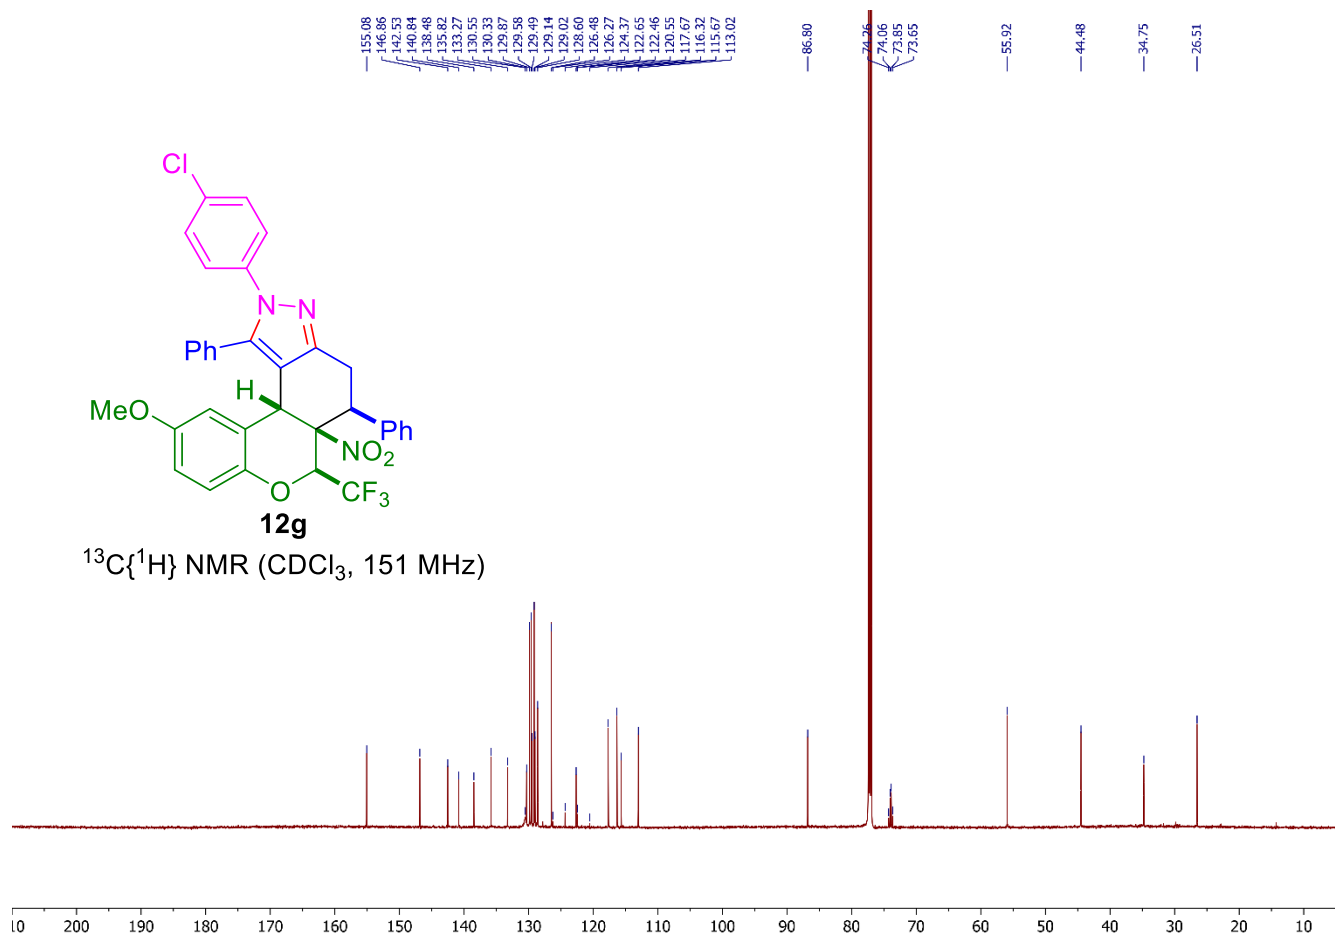



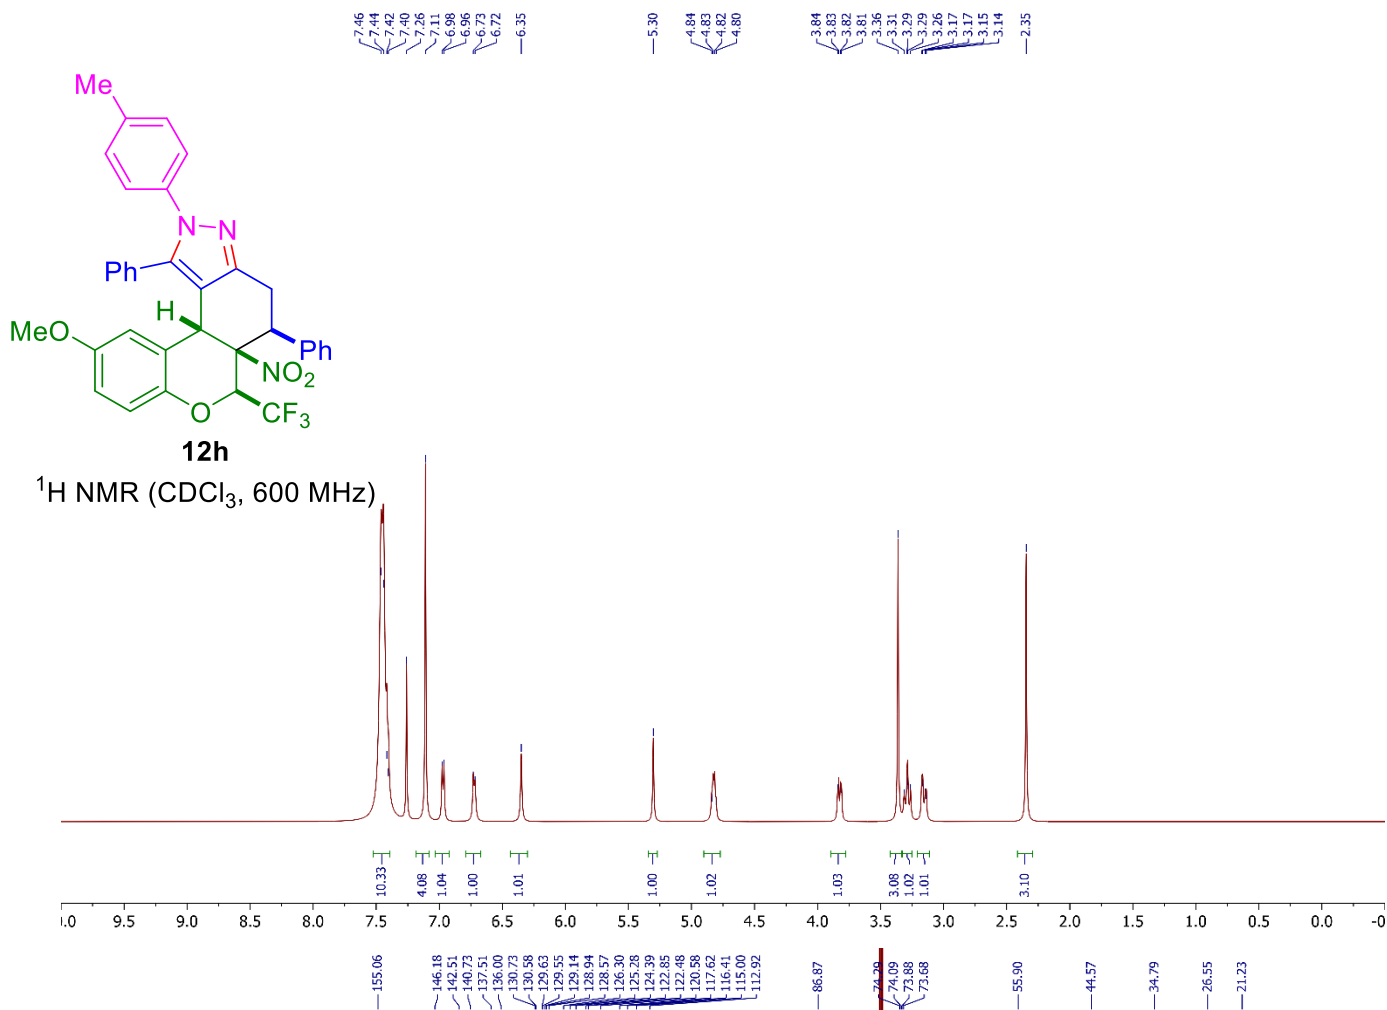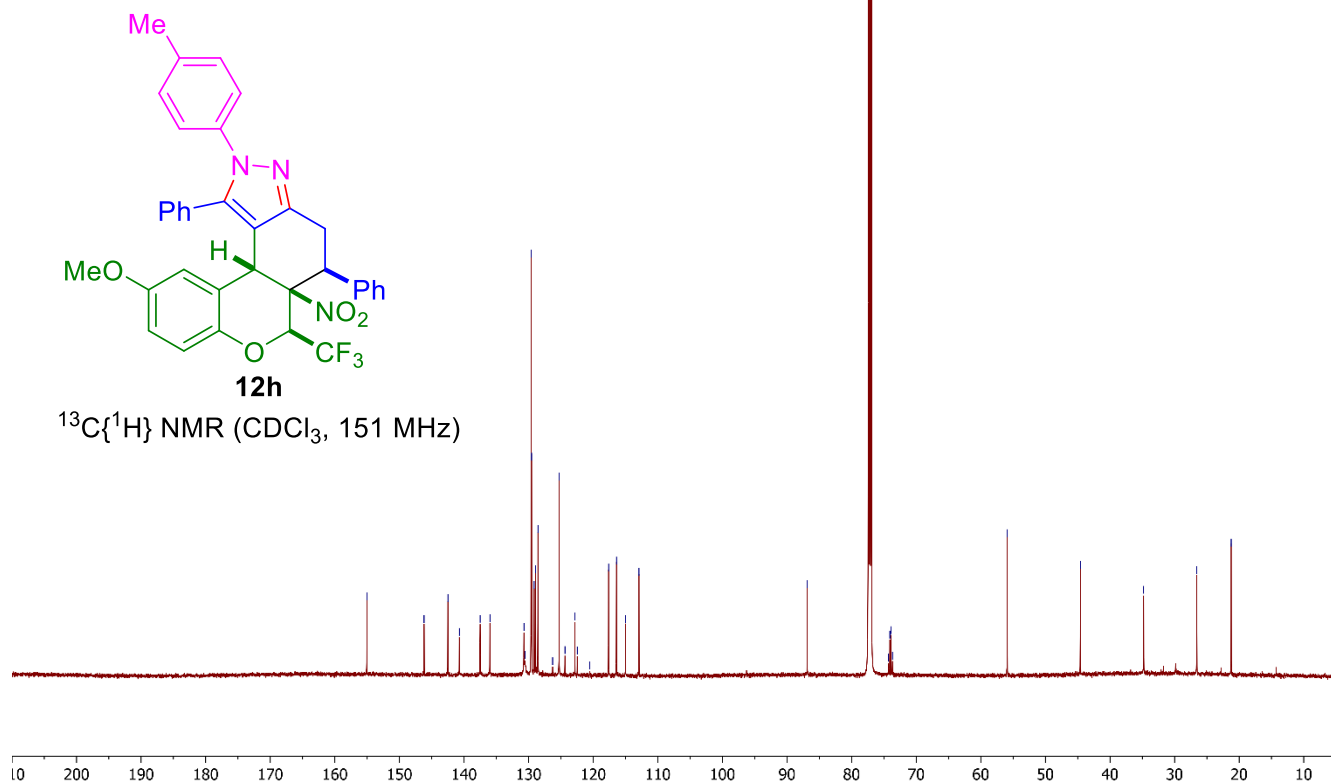

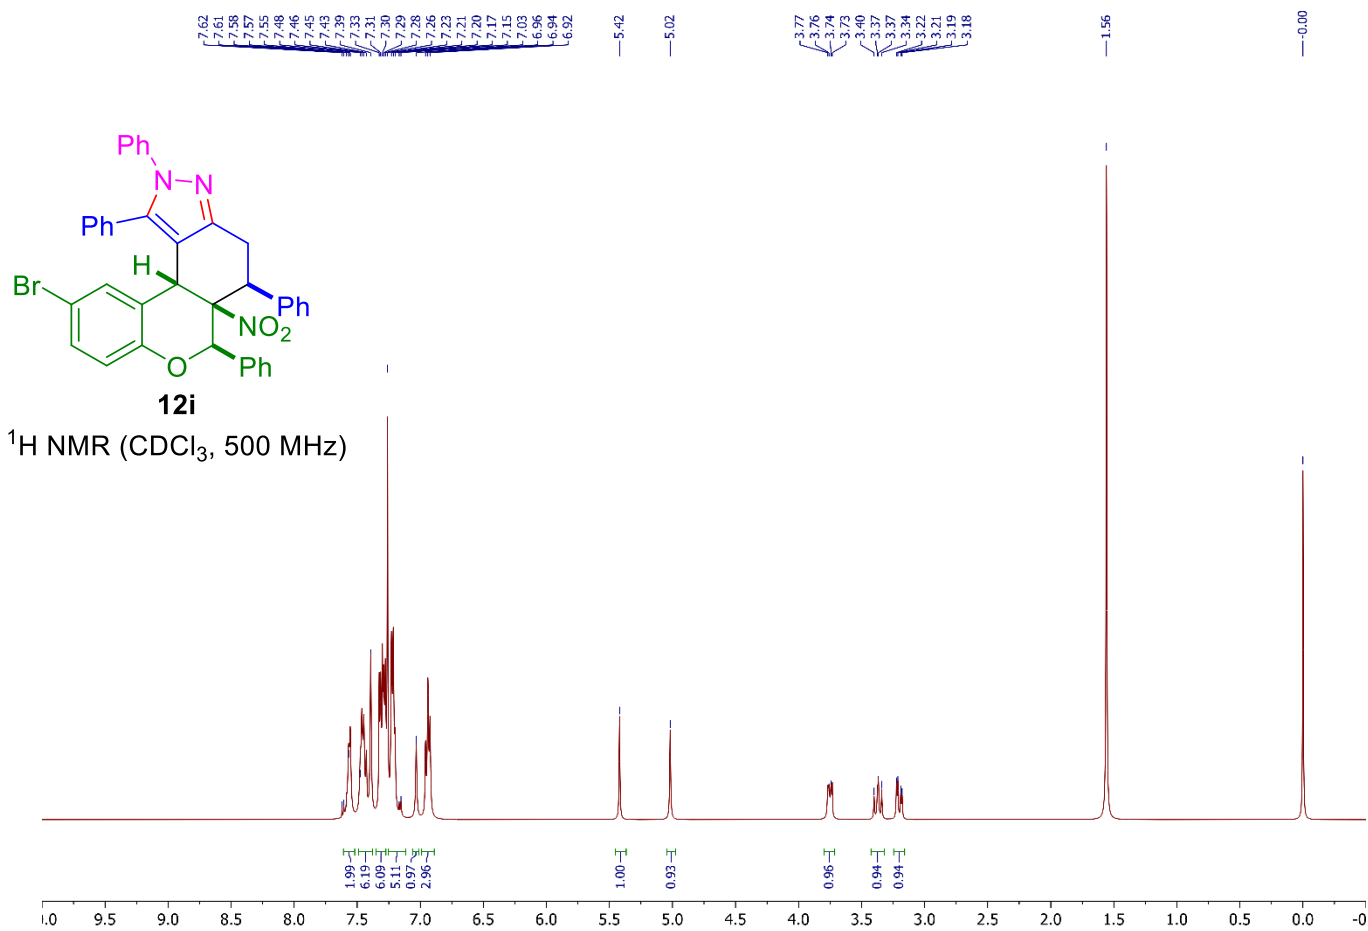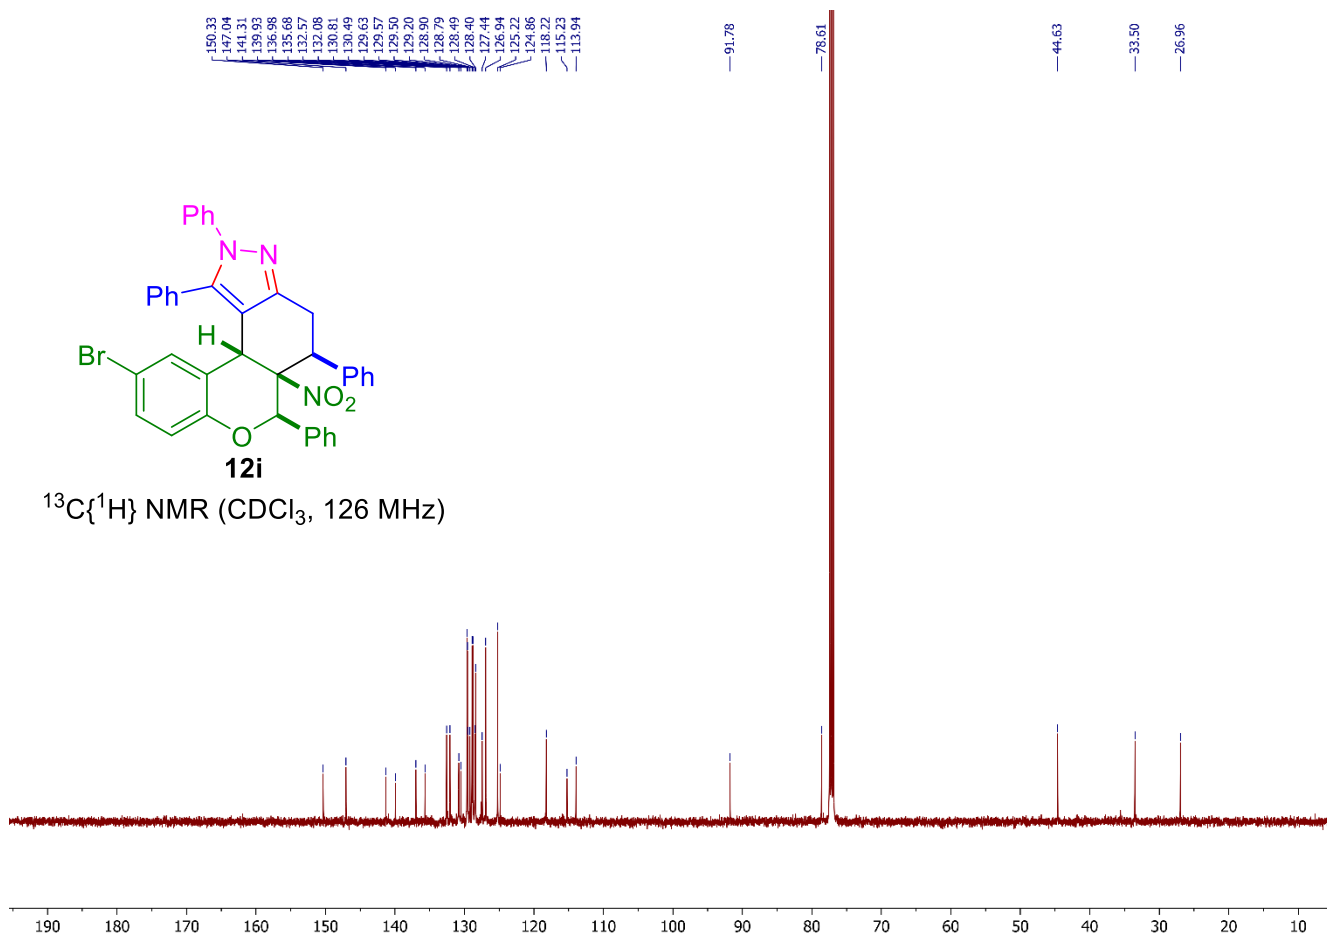

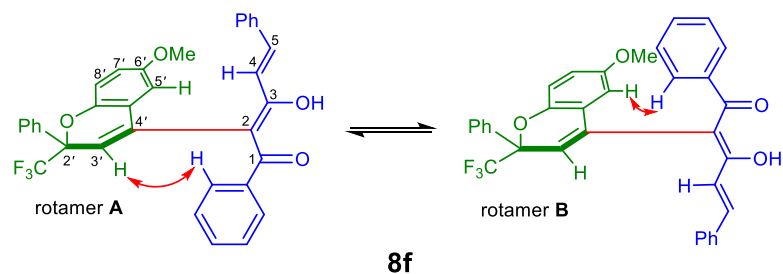

2D  $^1\text{H}$ - $^1\text{H}$  NOESY NMR ( $\text{CDCl}_3$ , 600 MHz)

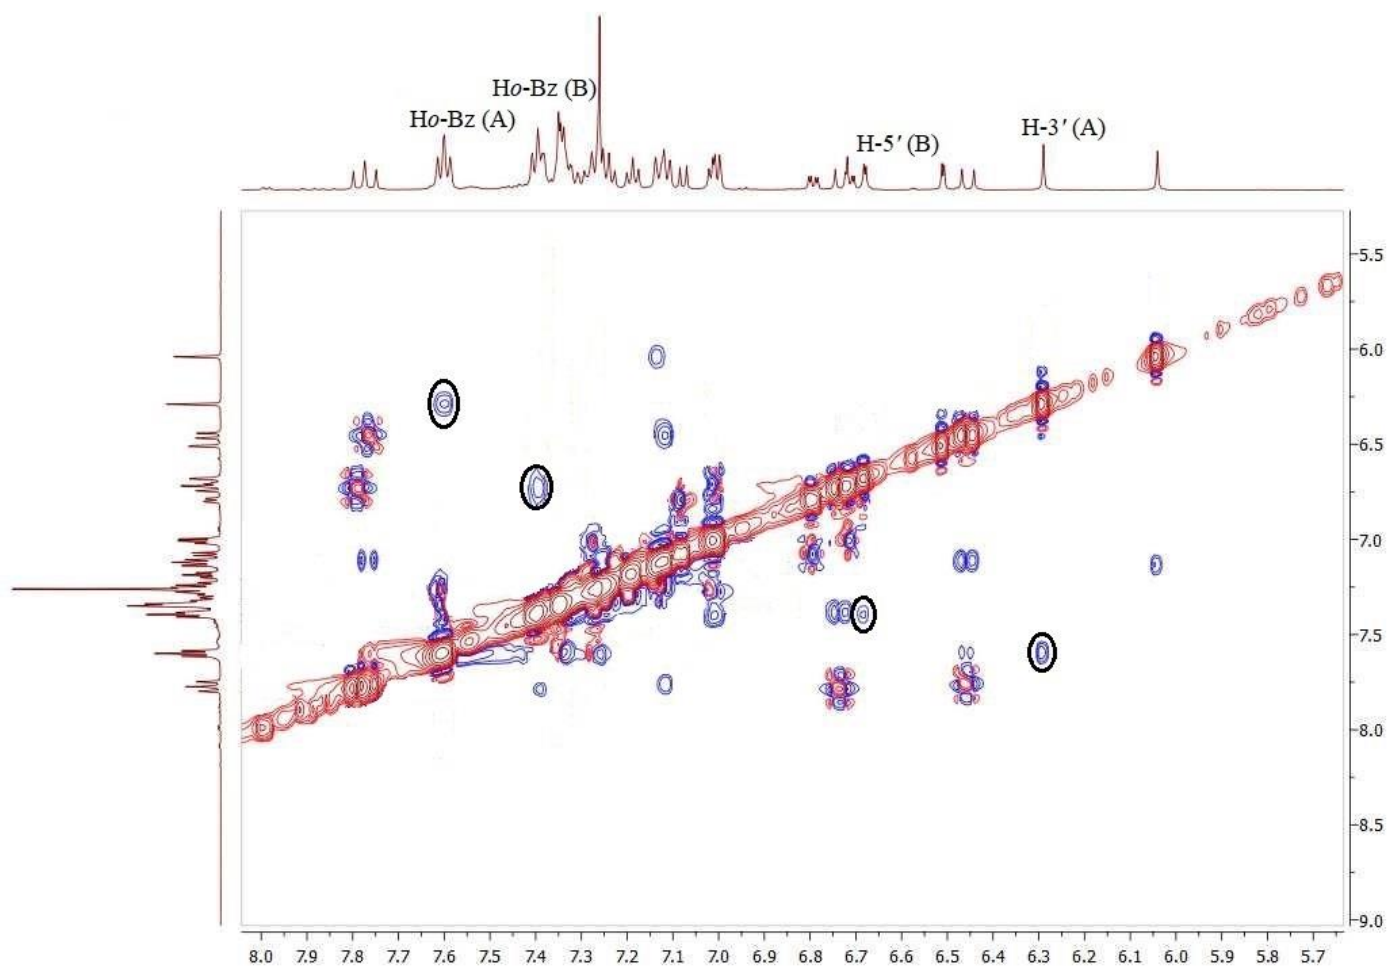

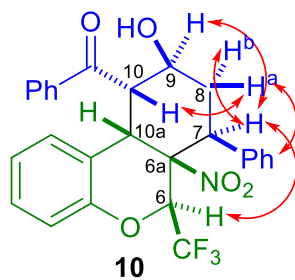

2D <sup>1</sup>H-<sup>1</sup>H NOESY NMR (CDCl<sub>3</sub>, 600 MHz)

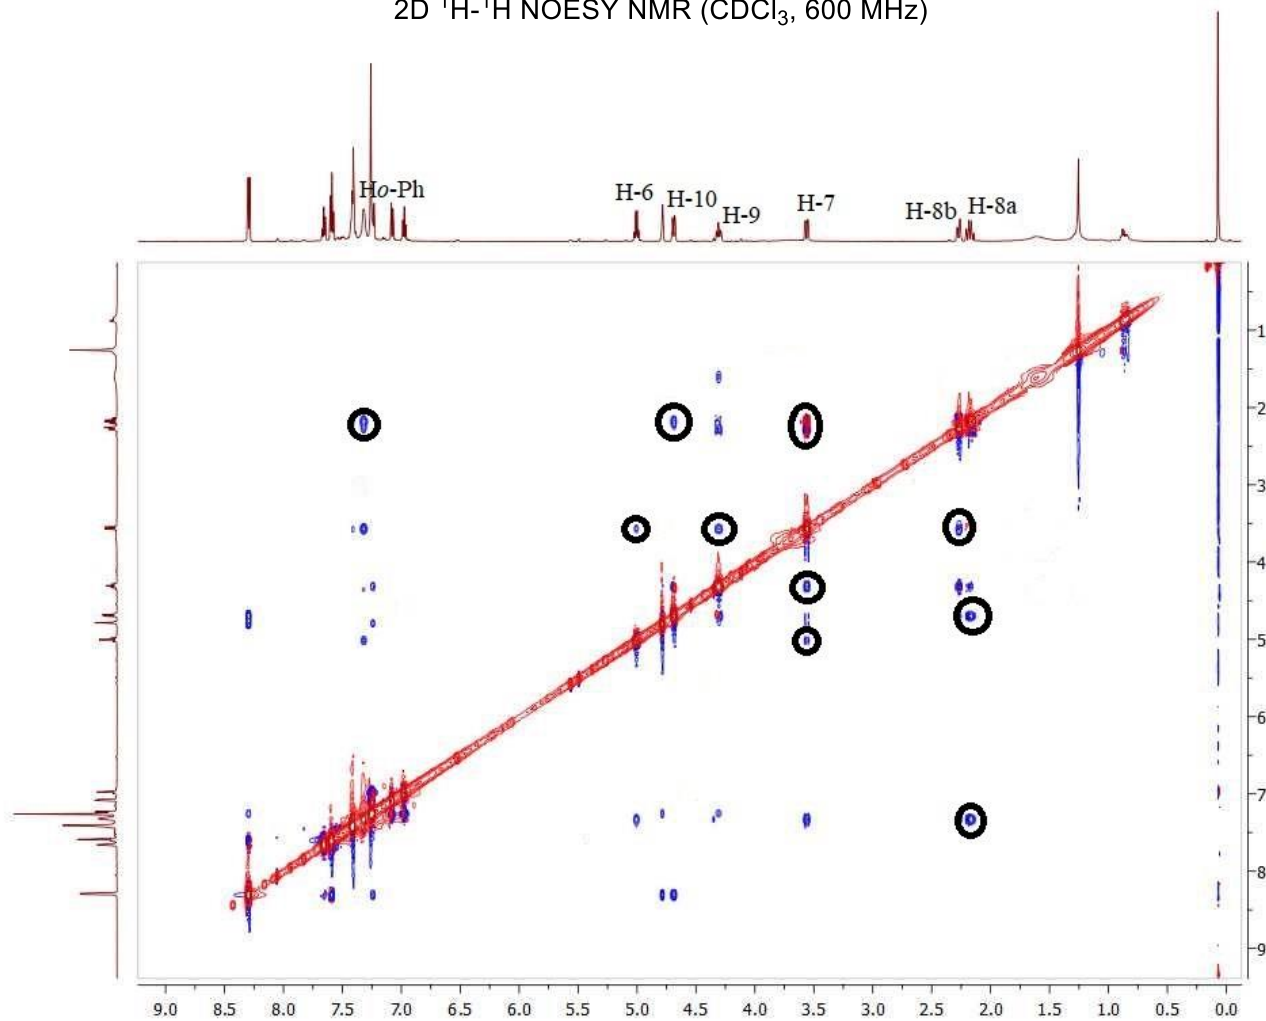

Supplement: d2nj02019j1.pdf [file d2nj02019j1.pdf]
